# Supplementary material for: The Richness and Diversity of Catalases in Bacteria
Source: Front Microbiol. 2021 Mar 19;12:645477. doi: 10.3389/fmicb.2021.645477 (PMC8017148; doi:10.3389/fmicb.2021.645477)
Supplement: Supplementary file 2 [file Data_Sheet_1.XLSX]

## Sheet: 4,860 bacteriacatalase homologs
Protein name	Protein Accession	Nucleotide Accession	Organism	Group	Sequence
A0126_05945_ASI35128.1	ASI35128.1	CP022236.1	Exiguobacterium oxidotolerans	typical catalase Group 5	MTNKKEEQMKAHQIDNTKKAGLTTNQGLKMAEDEFSLKAGLRGPTLIEDFHFREKMTHFDHERIPERIVHARGVGAHGEFQVYEPLAEITKAGFLNDPSKTTPVFVRFSTVQGSRGSGDTVRDVRGFSTKFYTDEGNYDLVGNNIPVFFIQDAIKFPDFVHAVKPEPHTEVPQGASAHDTFWDFIGQNHETAHTVMWAMSDRGIPRSLRMMEGFGVHTFRLVNAQGKAHFVKFHWKPKLGVHSQVWDEAQKALGKNPDFHRVDLYEAIDKGDFPEWELGLQLIAEEDEFKFDFDILDPTKLWPEEEVPVRLVGKMTLNRNVDNFFAETEQVAFHPGHIVPGIDFSNDPLLQGRLFSYTDTQLSRLGGPNFHQIPINQPVCPYHNNQRDGMHQMAVHKGQ…
A0126_10780_ASI36038.1	ASI36038.1	CP022236.1	Exiguobacterium oxidotolerans	typical catalase Group 2	MNENEKKLTTNQGVPIGDNQNSRTAGRRGPTLLEDYQLIEKIAHFDRERVPERVVHARGFGAHGVFKVKNSMKKYTKAAFLQEEGTEVPVFARFSTVIHGTHSPETLRDPRGFSVKFYTEEGNWDFVGNNLPVFFIRDAMKFPDMVHSLKPDPRTNIQDPDRYWDFMTLRPESTNMLMHLFTDEGIPASYRKMRGSSVHSFKWVNAHGNTVYIKLRWVPKEGVHNLSADEATEVQGKDFNHASNDTFQAIENGDFPEWDLFVQVLDPADVENFDFDPLDATKDWFEDVIPFQHVGTMTLNKNVDNYFAETESVGFNPGVLVPGMLPSEDKLLQGRLFSYSDTQRHRIGPNYQQLPINCPFAQVNNYQRDGAMPFKQQTSSVNYEPNRYQDEPKQTPEYT…
A0128_08195_AOP33823.1	AOP33823.1	CP015217.1	Leptospira alstonii	typical catalase Group 7	MNKKTLTTSGGHPVPQNQHSLTAGPRGPVLIQDTHLIEKLAHFNRERIPERVVHAKGAGAYGTLTITQDLSKYSRASVFSKVGKQTPLFLRFSTVAGEKGSADTERDPRGFAIKFYTEEGIWDLVGNNTPVFFERDPLKFPDFIHSQKRDPVTGYKNPFRMWDYWAKAPEALHQMTILFGDRGIPDGYRFMNGYGSHTFGLWNTKGERFWVKFHFKSLQGIKNLSGEKGAALAGTDPDYATRDLFEAIERKEFPKWRFCVQIMPEEEAEKTKFNPFDLTKVWSHKDYPLIEVGVLELNANPKNYFEEVEQAAFSPANMPPGIGASPDKMLQGRLFAYPDAQRYRLGVQYQQLPVNRPKNPVNVYHRDGSVKFQSDGNFDNYEPNGFEGPSQDSSFAEPP…
A0256_04805_AMR30790.1	AMR30790.1	CP014773.1	Mucilaginibacter sp. PAMC 26640	catalase-peroxidase Group 4	MQDKPQHGISGGDNQPGDASNCPFLNGALEQSAGSGTRNRDWWPKQLKLNILRQHSALTNPMGSDFNYAEAFKSLDLAAVKQDLNVLMTDSQDWWPADFGHYGGLFIRMAWHSAGTYRIGDGRGGAGAGLQRFAPLNSWPDNVSLDKARRLLWPIKQKYGNKISWADLMILAGNVALDSMGFKTFGFGGGRADVWEADESVYWGAETTWLGNDKRYANGQEGVEGHGVLVSDEDADGQIHDRILEQPLGAAHMGLIYVNPEGPDGIPDPVLSARDIRETFGRMAMNDEETVALIAGGHSFGKTHGASTSEHVDKEPEAAGLELQGFGWANTFGAGKGPDTITSGLEVTWTTTPTQWSNNYFENLFGFEWELTKSPGGAHQWVAKDAEEIIPDAYDSAKK…
A0256_12785_AMR32235.1	AMR32235.1	CP014773.1	Mucilaginibacter sp. PAMC 26640	typical catalase Group 5	MANNKPADNPAAIPGNVKVDKLGEFRDDATGHMMTTNTGLKINDDQNSLKAGDRGPSLLEDFILREKITHFDHERIPERVVHARGSGAHGVFKLYEDQSAVTKAGFLNDVSLETPVFVRFSTVAGSKGSSDLARDVRGFAVRFYTQEGNFDLVGNNMPVFFIQDAIKFPDLIHAVKPEPDSEIPQAASAHDTFWDFISLMPESSHMVMWAMSDRALPRSLRMMEGFGVHTFRFVNAEGVASFVKFHWKPLLGVHSVAWSEAQAISGKDPDFHRRDLWEAIESGNFPEWELGVQIIPEEDEFKFEFDLLDSTKLVPEELVPVQRIGKMTLNRNPDNFFAETEQVAFHLGHVVPGIDFTNDPLLQGRLFSYTDTQLTRLGGPNFQEIPINRPVVPVYNNQR…
A0257_02105_AMR29583.1	AMR29583.1	CP014771.1	Hymenobacter sp. PAMC 26554	catalase-peroxidase Group 4	MNDPSAAKCPFLAGQTQQAAGGGTRDRDWWPNMLRLNILRQHSALANPMGADFNYVEEFKKLDFNAVKQDLLELMTTSQDWWPADYGHYGPFFIRMAWHSAGTYRIADGRGGAGAGMQRFAPLNSWPDNANLDKARLLLWPIKQKYGEQISWADLMILAGNCALESMGLKPFGYSGGRADVWEPMDEVYWGSEREWLGDKRYTGDRQLENPLAAVQMGLIYVNPEGPNGNPNPLGSARDIRETFGRMAMNDEETVALIAGGHTFGKTHGAADPAQYIAHEPAAAGIEQQGKGWLNTYGTGNAGDTITSGLEGAWTATPAKWGNGYFNNLFGFEWELTKSPAGAHQWKPKGDAGAGLIPDAHDPNKSHQPFMLTSDIAMREDPIYEKISRRFHENPEEFA…
A0257_04865_AMR26503.1	AMR26503.1	CP014771.1	Hymenobacter sp. PAMC 26554	typical catalase Group 5	MKQKPLAKQNHEDMVSNPKTDELAKNREDGYGQFLTTNQGLRVNDDQNSLKAGDRGPTLLEDFIYREKMTHFDHERIPERVIHARGVAAHGYFEAYGNATDLTRAAFLQPGAVTPIFTRFSTVAGSRGSSDMARDVRGFAVKFYTEEGVYDFVGNDMPVFFIQDAIKFPDFIHAVKPEPHNEIPQAASAHDTFYDFISTNPESIHMLLWVMSDRGLPRSLRMMEGFGVHTYRMINAEGKSRFVKFHWKPKQGVHSVAWEEAQQISGNDPDFHRRDLWNCIESGAYPEWELGVQVIEEEDEMKFGFDILDSTKLIPEEQVPVQLIGKMVLNRNVDNYFAETEQVAFCLSHMVPGIDFSNDPLLQGRIFSYLDTQLKRLGGPNFHEIPINRSLAPVHNNQR…
A0259_01295_AMR21371.1	AMR21371.1	CP014768.1	Shigella sp. PAMC 28760	catalase-peroxidase Group 4	MSTSDDIHNTTATGKCPFHQGGHDQSAGAGTTTRDWWPNQLRVDLLNQHSNRSNPLGEDFDYRKEFSKLDYYGLKKDLKALLTESQPWWPADWGSYAGLFIRMAWHGAGTYRSIDGRGGAGRGQQRFAPLNSWPDNVSLDKARRLLWPIKQKYGQKISWADLFILAGNVALENSGFRTFGFGAGREDVWEPDLDVNWGDEKAWLTHRHPEALAKAPLGATEMGLIYVNPEGPDHSGEPLSAAAAIRATFGNMGMNDEETVALIAGGHTLGKTHGAGPTSNVGPDPEAAPIEEQGLGWASTYGSGVGADAITSGLEVVWTQTPTQWSNYFFENLFKYEWVQTRSPAGAIQFEAVDAPEIIPDPFDPSKKRKPTMLVTDLTLRFDPEFEKISRRFLNDPQA…
A0259_12715_AMR23430.1	AMR23430.1	CP014768.1	Shigella sp. PAMC 28760	typical catalase Group 5	MSQHNEKNPHQHQSPLHDSSEAKPGMDSLAPEDGSHRPAAEPTPPGAQPTAPGSLKAPDTRNEKLNSLEDVRKGSENYALTTNQGVRIADDQNSLRAGNRGPTLLEDFILREKITHFDHERIPERIVHARGSAAHGYFQPYKSLSDITKADFLSDPNKITPVFVRFSTVQGGAGSADTVRDIRGFATKFYTEEGIFDLVGNNTPIFFIQDAHKFPDFVHAVKPEPHWAIPQGQSAHDTFWDYVSLQPETLHNVMWAMSDRGIPRSYRTMEGFGIHTFRLINAEGKATFVRFHWKPLAGKASLVWDEAQKLTGRDPDFHRRELWEAIEAGDFPEYELGFQLIPEEDEFKFDFDLLDPTKLIPEELVPVQRVGNMVLNRNPDNFFAENEQAAFHPGHIVPG…
A0J50_10555_AMO41051.1	AMO41051.1	CP014651.1	Acinetobacter sp. DUT-2	typical catalase Group 5	MTDNVKSTNKTSEMAGADAANKANTTQKTEQLDSVRDDATNEALTTNQGVKIADNQNSLRAGIRGSTLLEDFILREKITHFDHERIPERIVHARGVGAHGYFQAYEGNEHLTKAGFLTDPTIQTPIFVRFSTVQGPRGSADTVRDIRGFAIKFYTQEGNFDLVGNNAPVFFVQDGIKFPDFVHAVKPEPDTEIPTGATAHDTFWDFVSLVPESAHAVIWAMSDRAIPRNLRSIQGFGVHTFRLINAEGKSHFVKFHWTPKQGLSALVWDEAQKLAGKDPDFHRRDLYEAIENGVYPEWELGVQIVEEEDEMNFDFDLLDPTKIIPEELVPVTPIGRFVLNRNVDNFFAETEQVAFCPGHIVPGIDFTNDPLLQARLFSYTDTQLSRLGGPNFHQIPINK…
A0J50_15445_AMO41900.1	AMO41900.1	CP014651.1	Acinetobacter sp. DUT-2	catalase-peroxidase Group 4	MSDESKCPFSGHKSKPEVTVGGGTPSLHWWPKQLRVDLLNQHSERSNPLGKEFNYRQEFKKLDYYTLKADIKNVLTDSQDWWPADWGNYTGLFIRLAWHAAGTYRMGDGRGGAGRGQQRFAPLNSWPDNASLDKARRLLWPVKQKYGQKISWADLFILAGNIALESSGFRTFGFGAGREDVWEPDNDVNWGDEKEWLAHRNSEALEGSNLAATEMGLIYVNPEGPQASGDPKSAAPFIRATFGNMAMDDEEIVALIAGGHTLGKTHGAASADHVQADPEGASIEQMGFGWSNSFGTGVGKDAITSGLEVIWSQTPTQWSNYFFENLFKYEWLQERSPAGAIQWVAADAEAIIPDPFDPSVKRKPTMLTTDLTLRFDPEFEKISRRFLNDPQAFANAFAR…
A0O31_00593_APD08788.1	APD08788.1	CP016312.1	Thermus brockianus	Mn-catalase Group 07	MFLRIDRLQIELPMPKEQDPNAAAAVQALLGGRFGEMSTLMNYMYQSFNFRGKKALKPYYDLIANIATEELGHIELVSATINSLLAKNPGKDLEEGVDPVSAPLGFAKDARNAAHFIAGGANTLVMGAMGEHWHGEYVFTSGNLILDLLHNFFLEVAARTHKLRVYEMTDNPVAREMIGYLLVRGGVHAAAYGKALETLTGVEMTKMLPIPRIDNSKIPEAKKYMDLGFHRNLYRFSPSDYQDLGLIWNGASPEDGSEVVVDGPPTGGPVFDAGHDAAEFAPEFHPAELYEIAKKLYEKAK
A0O34_10730_ANF50963.1	ANF50963.1	CP015199.1	Chryseobacterium sp. IHBB 10212	typical catalase Group 7	MDSKKLTLSSGAPYYEHQDSQTVGPRGPVLLQDFILQENLAHFVRERIPERIVHAKGTGAYGKLTITHDISKYTKAKLFSQVGNSCKMFARFSTVGGEKGSADTARDPRGFALKFYTEDGNWDLVGNNTPVFFIKDAKKFPDFIHTQKRVPRTNLKSATMMWDFWSLNPESLHQVLILMSDRGTPHGFRHMHGFGSHTFSMINANNERVWVKFHFKTKQGVKNFTNEDAVKMAGENPDFAQEDLCNAIDNGDFPKWTMYIQIMTEDQAKDFRWNPFDITKVWFQGDFPLIEVGEMELNEIPVNYFTHVEQSTFSPSNLIDGISFSPDKMLQGRLFSYPDAHRYRVGVNAHQLEVNRCPFAVNNYQRDGFMANSSQYQDKPNYHPNSFDDIKADSAYKNF…
A0O34_13265_ANF51416.1	ANF51416.1	CP015199.1	Chryseobacterium sp. IHBB 10212	catalase-peroxidase Group 4	MEKDLNDISKCPFHNGTMKKENVAGGGTNNKDWWPDHLRVDILRQHSSLSNPMEENFDYAEAFKSLDLESVKKDLHALMTDSQDWWPADFGHYGPLFIRMAWHSAGTYRVGDGRGGAGAGQQRFAPLNSWPDNVSLDKARRLLWPIKQKYGKKISWADLLILTGNIALESMGFKTFGFAGGREDVWEPDQDVYWGTEKTWLGGDLRYAHGSEGVVENRGVLPTDDNADGDIHSRNLEKPLAAVQMGLIYVNPEGPDGNPDPILAAKDIRDTFGRMAMNDEETVALIAGGHTFGKTHGAGPAEHVGKEPEAAGIESQGFGWNSSYKSGKGTDAISSGLEVTWTEKPTEWSNLFFKNLFENEWELTKSPAGAHQWVAKDGEKIIPDAFDSTKKHRATMLTT…
A0O34_20820_ANF52807.1	ANF52807.1	CP015199.1	Chryseobacterium sp. IHBB 10212	typical catalase Group 5	MKDPKTPPNEKVDQLQNHTTDNADQKLTTNQGLKINNNQDSLKAEERGPSLLEDFILREKITHFDHERIPERIVHARGSGAHGTFKLNKSLKEFTKAKFLSEEGKETPVFVRFSTVAGSAGSTDLARDVRGFAIKFYTEEGNYDLVGNNIPVFFIQDAMKFPDLVHAVKPEPDNAIPQAASAHDTFWDFISLMPESMHMIMWAMSDRAIPRSFRMMEGFGVHTFKFINDEGAVHFVKFHFKPKLGVHSVAWDEATKISGKDSDFHRRDLWEAIDNGAFPEWDFGVQIIPEEDEHKFDFDLLDPTKLIPEEEVPVQMVGTLTLNRNPDNFFAETEQIAFHPGHLVPGIDFTNDPLLQGRLFSYTDTQLSRLGSPNFHEIPINRSLNEVHNNQRDGHMRQQ…
A0U89_02635_AOX16198.1	AOX16198.1	CP014674.1	Kozakia baliensis	typical catalase Group 5	MSDEETQRKKVTIDDQTIQRGPQGATHQVAEGDIPTLTTQQGTPVADDQNTYKAGARGPTLLEDFHFREKIFHFDHERIPERVVHARGYGAHGFFELTDSLGDLTTASVLSKVGERVPAFVRFSTVAGNKGSFDLARDVRGFAVKLYTEQGNWDLVGNNIPVFFIQDAIKFPDMVHAVKEEPDRGFPQAQSAHDNFWDFASLSPETVHMLLWIMSDRAIPRSFRFMEGFGVHSFRLIDAQGKSTYVKFHWKPKQGLQSVVWNEALKINGADPDFHRRDLWDAITSGNYPEWELGVQLFDDEFADKFDFDILDATKLIPEEILPIRRIGRLVLDRVVDNFFAETEQVAFCTQNVVPGIGFTNDPLLQGRNFSYLDTQTKRLGGPNFTHIPINAPKCPFHN…
A0U91_11205_AQT05332.1	AQT05332.1	CP014687.1	Acetobacter persici	typical catalase Group 5	MTMSARSAHTDQTTVTLGEETVQRGAGGETHQTAGGDVPTLTTQQGVPVSDNQNTLKAGVRGPSLMEDFHFREKLFHFDHERIPERVVHARGYGAHGYFELTNSLSNITSADVLQREGERVPAFVRFSTVAGSKGSTDLARDARGFAVKLYTKEGNWDIVGNNIPVFFIQDAIKFPDMVHAVKEEPDRAFPQAQSAHDSFWDFISLTPESMNMIMWVMSDRGIPRSFRFMEGFGVHTFRFVNKAGQSTYAKFHWKPKMGLQSVVWNEALKISGADPDFHRRDLWNAIQSGNFPEWELGVQLFDDEFADRFEFDILDATKLIPEEVLPVQPVGRLVLDRMVDNFFAETEQVAFCTQNIVPGVDFTNDPLLQGRNFSYLDTQLKRLGGPNFTHIPINAPKC…
A0U93_14905_AQS88994.1	AQS88994.1	CP014691.1	Neoasaia chiangmaiensis	typical catalase Group 5	MANDLEAADRVTINDQTFQRGPQGATHQTARGETPTLTTQQGVPVSDDQNSLKAGPRGPVVLEDFHLREKIFHFDHERIPERVVHARGYGAHGFFELTDSLSEYTRASVLSKVGQRVPAFVRFSTVAGNKGSFDLARDVRGFAVKLYTEEGNWDLVGNNIPVFFIQDAIKFPDMVHAVKQEPDRGFPQAQSAHDNFWDFASLSPETTHMLMWVMSDRAIPRSFRFIEGFGVHTFRLVTAEGKSTYVKFHWKPKQGLQSVVWNEAVKINGADPDFHRRDLWDAITSGNYPEWELGVQLFDDSFADKFDFDILDATKLIPEEIVPVRRVGRLVLDRMVDNFFAETEQVAFCTQNIVPGIDFTNDPLLQGRNFSYLDTQTKRLGGPNFTHIPINAPKCPFHN…
A0U93_15040_AQS89013.1	AQS89013.1	CP014691.1	Neoasaia chiangmaiensis	typical catalase Group 7	MTRSHITTTAGAPWPDNQDSKSAGARGPLLLENYQLIEKLAHQNRERIPERTVHAKGSGAFGHFTVTQDITHLSCADVFSAVGKKTELLARFSTVAGERGAADAERDVRGFSLKFYTGEGNWDLVGNNTPVFFVRDPMKFPDFIHTQKRHPRTNMRSATAMWDFWSLSPESLHQVAILFSDRGLPQGYRFMNGYGSHTFSLWNASGERFWVKFHFKTQQGHRFWTNDEANDIIGRNRETSQADLYDAIERQEFPRWTMYIQVMREDEAERVDFNPFDITKVWSHKDYPLHEVGVVELNRNPENYFAEIEQSSFSPSNIVPGIGFSPDKMLQGRLFAYADAHRYRVGTHYEALPVNRPKVPVRTYHMDGPMRFDATEGSDAYYEPNSFDGPAEARQAIEP…
A0U94_07690_AQS92127.1	AQS92127.1	CP014689.1	Gluconobacter albidus	typical catalase Group 6	MTNEQAKPFHTTDSGIPVSSDEHSLTVGADGPILLHDHYLIEQMAAFNREMIPDRQPHAKGSGAFGRFEVTHDVSRYTSAKFLQPGAVTEAVARFSTVAGEAGSPDTWRDPRGFALKFYTEEGNFDMVGNNTPVFFVRDPLKFQHFIHSQKRRVDNGLRDNDMQWDFWTLSPESAHQVTWLMGDRGIPASWRHMDGFSSHTYLWVNATGERFWVKYHFKTDQGIKCLTQEQAGQLAGSDADYHRRDLHMAIKRGEHPSWTLKMQIMPYEDAKTYHINPFDLTKVWPQGEYPLIEVGRLTLDRNPTDFHSQIEQLAFEPNNFVPGTGLSPDKMLLGRSFAYADAHRARLGVNYKQIPVNAPKCPVHGYTKGGVMRMRDAHDPVYVPNSKGGPVANPQRFP…
A0V43_05800_AMQ20532.1	AMQ20532.1	CP014749.1	Geobacillus sp. JS12	catalase-peroxidase Group 3	MGNQQNASKCPYHGSVTSYNSNRTTNKDWWPNQLNLNILHQHDRKTNPHDEEFNYAEEFQKLDYWALKEDLRKLMTESQDWWPADYGHYGPLFIRMAWHSAGTYRIGDGRGGASTGTQRFAPLNSWPDNANLDKARRLLWPIKKKYGNKISWADLMILAGNVAIESMGGKTIGFGGGREDVWHPEEDIYWGAEKEWLSSERYSGDRELENPLAAVQMGLIYVNPEGPDGKPDPKAAARDIRETFRRMGMNDEETVALIAGGHTFGKAHGAGPASHVGPEPEAAPIEAQGLGWISSYGKGKGRDTITSGIEGAWTPTPTKWDMSYFDMLFGYDWWLTKSPSGAWQWMAVDPKEEHLAPDVEDPSKKVPTMMMTTDLALRFDPEFEKIARRFHENPDEFAD…
A0V43_13030_AMQ21649.1	AMQ21649.1	CP014749.1	Geobacillus sp. JS12	Mn-catalase Group 07	MVFQRIDRLAIELPKPKYADPNAAAAVQELLGGRFGEMSTLNNYLFQSFNFRQKKKLRPFYELVASITAEEFGHVELVSNAINLCLTGSTHPGDPDTAPMKDAKDKRNTYHFIATAQTAFPGDSMGKAWTGEYVFNSGNLILDLLHNFFLECGARTHKMRVYEMTDHPTAREMIGYLLVRGGVHILAYAKAIEVATGVDVTKLLPIPKLDNRVFDEARKYEDQGVHRRLYTFSDRYYKEIVRIWQGTHPSDGQPLEVVEGAPQGGEIPDLDEVPEEFAPGISAEDFFEIAKRLQRSAGL
A0W34_02325_ARE32308.1	ARE32308.1	CP014941.1	Rhodococcus sp. BH4	typical catalase Group 6	MTKPTTNNFGIAVASDDESLTAGIQGPVLLHDHYLIEKLAQFNRERVPERIVHAKGGGAFGELVITHDVSKYTKAAFLQPGKKTESLVRFSTVAGEQGSPDTWRDPRGFAMKFYTEEGNYDLVGNNTPVFFIKDAIKFPDFIRSQKRLPGSGLRDHDMQWDFWTLRPETAHQVTWLMGDRGIPKTWRNMDGFGSHTYQWVNAAGERFWVKYHFKTDQGIEFLTQAEADSLAGSDPDYHRADLYNAIEAGNFPSWTLKVQIMPVDEAEGYRFNPFDLTKVWSQKDYPLIEVGKWTLNRNPENFFAQIEQASFEPSNVVPGIGFSPDKMLLGRVFSYADAHRYRIGTNYADLPVNAPKNEVNSYSKEGAMRYSFNSPSTPVYAPNSYGGPHADPSVAGDEG…
A0W34_05900_ARE32921.1	ARE32921.1	CP014941.1	Rhodococcus sp. BH4	catalase-peroxidase Group 4	MSDSCPVAHDGNTESTSESENPAIPSPTPTGNRPRTNSDWWPNQPDLSVLHSHSSKSNPMGADFDYAQEFAKLDVEALKRDVIALMTASQDWWPADYGHYGGLFVRMSWHAAGTYRIADGRGGGGQGAQRFAPLNSWPDNASLDKARRLLWPVKQKYGKQVSWADLLVFAGNCALESMGFKTFGFGFGREDIWEPEEIYWGPEDTWLGDERYSGDRELSGPLGAVQMGLIYVNPEGPNGQPDPVAAARDIRETFARMAMNDVETAALIAGGHTFGKTHGAGPADLVGPEPEGAPIEQQGLGWKSAFGTGVGKDAITSGLEVVWTPTPTKWDNTFLEILYGYDWELTKSPAGAWQWIPKDGAGAGTIPDPFDSSAGRTPTMLTTDLSLRLDPTYEKITRR…
A0W34_27750_ARE36665.1	ARE36665.1	CP014941.1	Rhodococcus sp. BH4	typical catalase Group 5	MPSSQSVPGAPAPKAPDLKEPVKPRQPLPPKDDQRQPEVRTVAGAEEKVKGNGRGQRGEYLTTATGTRLYETDHSLTAGERGPTLLQDHHLREKITHFDHERIPERVVHARGAAAHGTFLANGAAENICKASVFASGARTPVFVRFSTVLGSRGSADTVRDTRGFATKFYTDEGVFDLVGNNIPVFFIQDGIKFPDIIHAAKPHPDREIPQAQSAHDTFWDFVSLHTEATAHTLWNMSDRGIPRSYRMMEGFGIHTFRLVNAEGETNLVKFHWKPAAGVHSLVWEEAQIAGGVDPDFHRRDLADAIEAGAYPSWDLGVQVFPDTEDEMFEGIDLLDPTKIVPEELAPVQVIGTMTLDANPTNFFAETEQVAFHPGHLVPGVDITNDRLLQARLFSYLDT…
A11Q_237_AGH94457.1	AGH94457.1	CP003537.1	Bdellovibrio exovorus JSS	typical catalase Group 7	MSDSDKKSKCPFSRLTTAFGAPVADNQNSMTAGARGPLLMQDVWLLEKLANLNRENIPERRMHAKGSGAFGTFTVTNDITKYSKAKIFSQVGKKTEMFARFTTVAGERGAADAERDIRGFALKFYTEEGNWDMVGNNTPVFFVRDPRKFPDLNKAVKRDPKTNLRSATNNWDFWTLLPEALHQVTIVMSDRGIPKSYRHMHGFSSHTYSFINSNNERFWVKMHFQTLQGIQNLTDQEAETLVGKDRESHQRDLFDAIERKDYPKWKMSIQVMPETDADKYRLHPFDLTKVWYKKDYPLIEVGIVELNRNPENFHADVEQSAFAPNNLVPGISVSPDKMLQARLFAYSDAQRYRLGVNHHQIPVNAARCPVNSNHRDGQGRVDGNYGGTPHYEPNSFKQW…
A11S_2117_AGH98915.1	AGH98915.1	CP003538.1	Micavibrio aeruginosavorus EPB	catalase-peroxidase Group 3	MKTAGKCPVAHGAMTAIGTSVMDWWPNALNLDILHQHDVKTNPLGPDFNYREELKKLDVVALKADLRALMKDSQEWWPADWGSYVGMMARVAWHAAGSYRNTDGRGGANTGNQRFAPLNSWPDNVNTDKGRRLLWPIKKKYGNKISWADLIMLAGTMAYEEAGLKTFGFAFGREDIWHPEKDTYWGDEKEWLAPSDGRYGDVKNPATLENPLAAVQMGLIYVNPEGVNGKSDPLATAAQMRETFARMGMNDEETVALTAGGHTIGKCHGNGKASDLSPDPEAAGPEYQGLGWMNTKGRGIGRDTMVSGLEGAWTTNPTQWDNGFFKMLFGHEWELRKSPAGATQWEPVSIKDEDKPVDVEDPSIRHNPMMTDADMALRVDPIYREISLRFMNDFDAFSD…
A176_000716_AKQ63804.1	AKQ63804.1	CP012109.1	Myxococcus hansupus	typical catalase Group 5	MKTRKPSAKSRPTTLKVESLEPHRMHAEGKVLTTDQGIPISDTDNSLKAGVRGPTLLEDFHFREKMMRFDHERIPERAVHARGSGAHGYFQVYKSLEKYTQASFLTDPSLRTPVFVRFSTVGGSRGSADTVRDVRGFATKFYTEQGNFDLVGNNMPVFFIQDGIKFPDFVHSVKPEPHNEIPQASSAHDSLWDFVSLVPETSHMVMWLMSDRAIPRSYRMMEGFGVHTFRLVNAEGKAHLVKFHWKPLLGNHALAWDEAQKLSGKDPDFHRRDLWDAIEAGDFPEYELGLQILPEGDELKYGFDLLDATKLLPEELVPVQRVGKLTLNRNPDNFFAETEQVAFCVANVVPGIDFTNDPLMQARLFSYLDTQLTRLGGPNFAELPINKPVCPVTNHQQDG…
A176_002513_AKQ65601.1	AKQ65601.1	CP012109.1	Myxococcus hansupus	typical catalase Group 2	MQTRSLLLSAMLLGGSAAVAATPPPLTTDTGSPVGTNQSSKTAGPRGGILLEDFHLIEKLARFDRERIPERVVHARGTGAYGTFESYGDFSKLTRASIFSAKGKKTPMFVRFSTVIHPSGSPETLRDPRGFALKFYTDEGNWDLVGNNLPIFFIRDAIKFPDMVHSLKPSPITNKQDPNRFFDFFSHQPESTHMLTQVYSDIGIPANYRQMNGHGVHSFKLVNAKGEYKYVKFNWASQQGVKSLTADEATRVVGQDHQHATSDLYASIGAGKFPSWELSVQVLDPKELDKFSFDPLDATKLWPEAQVPSIKLGKFTLNKMPDNFFEETEQAAFSPGVQPPGIEPSEDRLLQGRLFSYADTQRYRIGANYQSLPINKARAAVNNNSQAGSMNSANTKSDV…
A1OE_560_AFX98751.1	AFX98751.1	CP003539.1	Candidatus Endolissoclinum faulkneri L2	catalase-peroxidase Group 3	MNDTNKSIGCPLIHERQSTLGSTNRDWWPNQINLKILHQDPSIGNPLGADFKYAKEFNELEYYSLKNDLIHLMNDSQDWWPADYGHYGGLFIRMAWHSAGTYRTGDGRGGASSGSQRFAPLNSWPDNSNLDKARRLLWPIKQKYGNKISWADLIILTGNVALESMGFKTFGFGGGRKDIFEPKDDIYWGRETEWLARSDQKNSRYLDDEERILEQPLAAVQMGLIYVNPEGPDGNPDPIASAKDIRITFARMAMNDEETVALIAGGHTFGKCHGAGDPALVGPEPEGSDIIEQGLGWKNSFKTGFGPCTTTSGLEGSWTTNPTQWDMGYFDMLFGYEWELNQSPAGANQWKPKNFTKKDMAPAVDDQSKKVPIMMSTADMALRADPIYEKIARRYHTNL…
A21D_01786_AUJ24867.1	AUJ24867.1	CP018622.1	Virgibacillus dokdonensis	typical catalase Group 5	MSDHKQGQTKQEQLDAYRVDDKGKKMTTNQGLNVSEDEFSLKAGVRGPTIMEDFHFREKMTHFDHERIPERVVHARGYAAHGVFEVYESMEQYTKADFLKEKGKQTPVFVRFSTVAGSKGSGELARDVRGIATKFYTEEGNYDLVGNNMPVFFIQDAIKFPDLIHAVKPEPHTGIPQAASAHDTFWDFVANNQETAHMVMWQMSDRAIPRSFRMMEGFGVHTFRFVNEMGEATFVKFHWKPKLGVHSTVWDEAQKINGKNPDFHRQDLYEAIENGAYPEFELGVQLISEEDANAFDYDILDPTKIWPEEEVPVKIIGKMTLNRNVDNVFAETEQVAFHPGHVVPGIDFTNDPLLQGRLFSYTDTQLIRLGGPNFHELPINRPVCPFHNNQRDGYGRHTI…
A21D_02050_AUJ25131.1	AUJ25131.1	CP018622.1	Virgibacillus dokdonensis	typical catalase Group 6	MDTRNRMTTAAGAPVADNQNSITAGQRGPTLIQDFHLLEKLAHFNRERIPERIVHAKGAGAYGYFEVTNDEISKYTKADFLSEAGKRTDLFIRFSTVAGELGSADTVRDPRGFSVKFYTNEGNYDLVGNNTPIFFIRDAIKFPDFIHTQKRNPQTHLKDKDMVWDFWSLSPESLHQITYLHGDRGIPATFRHMNGYGSHTFKWVNKDGEAFWIKYHFISEQGVKGLEASLAEKIAGENPDYHIEDLHNAIANEDFPVWKLYVQIMPYEDAKTYKWDPFDVTKVWSKKDYPRIEVGRMILNRNPENYFAEVEQAAFSPGQFVPGIEASPDKMLQGRLFAYSDAHRYRLGVNHHQIPVNRPKAEVNHYQRDGFMAVNGNGGSKPNYEPNSVNGPVEDPTAK…
A21D_02280_AUJ25344.1	AUJ25344.1	CP018622.1	Virgibacillus dokdonensis	Mn-catalase Group 07	MFKRENRMLIELPVPEHGDPNAAAAVQELLGGKFGEMSTLNNYMFQSFNFRQKDKLKPFYDLVASITAEEFGHVELVTNTINLLSKGNTFYTGNPDVTPLREGKDSRNTYQFIATAQTALVGDSMGRAWTGDNVFSSGNLVLDLLHNFFLEVGARTHKMRVYEMTEHETAREMIGYLLVRGGTHVLAYAKALEIATGVDVKKLIPIPDLSNTKFDYARKFEEQGLANVLYTWNDVGDYNDIRQIWKGDNPENGEKLIVKEGTPKGGPVPNLEDLPEQFAPGIDKDDYQKIAKRLMENM
A2G06_13245_ANA41068.1	ANA41068.1	CP014963.1	Geobacter anodireducens	typical catalase Group 7	MAKKRLTTNAGAPVVDNQNIMTAGPRGPVLLQDVWFLEKLAHFDREVIPERRMHAKGSGAYGTFTVTRDITGYTKANVFSAVGKKTELFVRFSTVAGERGAADAERDIRGFAIKFYTEEGNWDLVGNNTPVFFLRDPLKFPDLNHAVKRDPRTNLRSARNNWDFWTSLPEALHQVTIVMSDRGIPATYRHMHGFGSHTFSFINARNERYWVKFHLKTQQGIRNLSDEEAEALIGKDRESHQRDLYESIEQGDFPRWTMFVQIMPEKEASSCPYHPFDLTKVWPHKDYPLQEVGVLELNRNPENYFAEVEQSAFNPANVVPGIGFSPDKMLQGRLFSYGDAQRYRLGVNHHLIPVNRARCPFHSYHRDGAMRVDGNHGSTLGYEPNSYGEWQEQPDFGEP…
A2G96_19405_AMR79747.1	AMR79747.1	CP014844.1	Cupriavidus nantongensis	typical catalase Group 7	MSKKDTLTTAAGAPVADNQNSQTAGPRGPMLLQDVWFLEKLAHFDREVIPERRVHAKGSGAYGTLRITHDITRYTKASVFAEIGKETPLFIRFSTVAGERGAADAERDVRGFSIKFYTDEGNWDLVGNNTPVFFVRDPLKFPDFIHTQKRNPRTNLRDPIAVWDFWSRHPESLHQVTILMSDRGLPQNYRQMHGFGSHTYSFINASNERFYVKFHFKSQQGVENWTNEEAARVVANDRESAQRDLFDNIERGNFPRWNLRVQVMPEAEAAKYHINPFDLTKVWPHKDYPLIDVGVVELNRNPDNYFAEVEQVAMNPANIVPGIGFSPDKMLQGRLFSYGDTQRYRLGINHAQIPVNAPKCPFHNSFHRDGAMRVDGNQGGKLNYEPNREGAYAASERMI…
A2G96_22680_AMR80649.1	AMR80649.1	CP014845.1	Cupriavidus nantongensis	typical catalase Group 5	MPDTPDAKAKSTSNTTSAAGINGAPAGYGDAQRGAGGELHQVAGGAHVPLTTNQGAPIADNQNSLKANPRGPTLLEDFILREKITHFDHERIPERIVHARGTAAHGYFELTDSLAQFTTASILTEVGVKTPVFARFSTVAGGAGSIDTPRDVRGFAVKFYTKEGNWDLVGNNIPVFFIQDAIKFPDVVHAVKMEPDRAFPQAATAHDTFWDFISLTPESMHMVMWIMSDRTIPRSLRMIEGFGVHSFRLLDEQGRSTFVKFHWRPKLGLQSTVWDEAVKIAGADPDFHRRDMFNAIQSGHFPEWELGVQLFTEGDAAKFPFDHLDPTKIIPEETVPLRIIGRMVLDRWPDNFFAETEQVAFCPANIVRGIDFSNDPLLLGRLFSYLDTQLLRLGGPNFN…
A2T59_03320_AMX53937.1	AMX53937.1	CP015068.2	Elizabethkingia anophelis	catalase-peroxidase Group 4	MENQSNDISKCPFHNGTLEKQNVSSNGTQNKDWWPKQLTLDILRQHSSLTDPMDEGFNYAEEFKKLDLAAVKKDLTDLMTDSQDWWPADFGHYGPLFIRMAWHSAGTYRVQDGRGGGGRGQQRFAPLNSWPDNVSLDKARRLLWPIKQKYGKKISWADLLILTGNVALESMGLQTKGFGGGRTDVWEADKDVYWGDEKTWLGTDKRYTGDRDLEDPLAATTMGLIYVNPEGPEGKPDPLAAAKDIRDTFGRMGMNDEETVALIAGGHTFGKTHGAGDAALVGAEPEGAGIEAQGLGWASKFGTGLGADAITSGLEVTWTKTPTKWSNDFFEHLFSYEWELTKSPAGAHQWIAKDAGDIIPNAFDAEKKGPAYMLTTDLSLRFDPIYEKISRRFYENPEE…
A2T59_12165_AMX55540.1	AMX55540.1	CP015068.2	Elizabethkingia anophelis	typical catalase Group 7	MENKKKLTNAAGIPYYNHEDSQTVGSRGPVLLQDFILQENLAHFVRERIPERIVHAKGSGAYGKFTVTGDISKYTRAKLFSKVGNECKMFARFSTVGGEKGSADTERDPRGFALKFYTEDGNWDLVGNNTPVFFIKDAKKFPDFIHTQKRVPRTNLKDHTVMWDYWSLNPESLHQVLILMSDRGTPHGYRHMHGYGSHTFAMINDKNERHWVKFHFKSQQGIKNFNNEEAADMKGKNPDFAQEDLVDAIDNGNFPKWTMQIQVMTEEQAKNFRWNPFDVTKVWPHNEYPLIDVGIMELNEVPVNYFAHVEQSTFAPSNLIDGISFSPDKMLQGRLFSYADAHRYRVGVNSHHLPVNACPFQVNNYQRDGYMAMGDNGGDAPNYFPNSFDNIAPDPTYKP…
A3224_00130_AMX01198.1	AMX01198.1	CP014864.1	Microbulbifer thermotolerans	typical catalase Group 7	MADKPTLTTTAGAPVPDNRNSLTAGPRGPLLLQDYQLIEKLAHQNRERIPERTVHANGWGAHGTLKITGDLSRYTCAKVLQPGVETPMLARFSTVAGERGAADAERDVRGFALKFYTEDGNWDLVGNNTPVFFVRDPYKFPDFIHTQKRHPRTNLRSPTAMWDFWSLCPESIHQVTILFSDRGLPVSPMHMNGYGSHTYSLWNHSGERYWVKFHFKTQQGHKYFTNAEAAEVIGHSRESYQEALYGAIERGDYPRWTMQVQVMPEKDADKMPFNPFDLTKVWPHGDFPPIDVGVMELNRNPDDYFAEIEQAAFSPSNIVPGIGHSPDKMLQARIFAYADAHRHRLGTHYEHLPINAPKCPVHNYYRDGEMNTTGCRTGNPDAYYEPNSFAGPIADPRAK…
A3224_01500_AMX01429.1	AMX01429.1	CP014864.1	Microbulbifer thermotolerans	catalase-peroxidase Group 2	MNKERNTMLKKCFPLAVFLTAVTSAGVNAQDAPMSNKDWWPSSIDLQPLRLHAEKSNPMDEDFDYAKAFESLDLDAVKKDIQEVLTTSQDWWPADYGNYGPFFIRMAWHSAGTYRVYDGRGGADGGQQRFEPLNSWPDNVSLDKARRLLWPVKQKYGNSISWGDLMVLAGNVALESMGFETFGYAGGREDQWEADVVYWGSEREWLANDKRYEGEKLEKPLAASHMGLIYVNPEGPNGVPDPLASAERIRDTFGRMAMNDEETVALIAGGHTFGKAHGAHKMDECVGDAPAGAALEEQGLGWRNKCGKGHSEDTITSGLEGAWTATPTRWSSQYLSNLFAFEWVQTRSPGGAIQWVPKNADKLKFVPDAHIEGKTHAPIMFTTDLALKFDPKYREIAKR…
A3224_04770_AMX01985.1	AMX01985.1	CP014864.1	Microbulbifer thermotolerans	catalase-peroxidase Group 3	MENNTSSAGKCPFMHGSNTEVGKSVTDWWPNALNLDILHQHDRKTDPMGGDFDYHKALKKLDVAALKQDLRELITSSQEWWPSDWGSYVGMFARVAWHTAGSYRVADGRGGAGTGNQRFAPLNSWPDNVNTDKGRRLLWPIKKKYGNKISWADLIILAGTIAYEVAGLKTYGFAFGRKDIWHPEKDTYWGAEKEWLAPSDGRYEDVGKPDSMENPLAAVQMGLIYVNPEGVNGQPDPQKTADQVRETFARMAMDDEETVALTAGGHTIGKCHGNGRAEDLSPEPEAADVEYQGLGWFNTKGRGIGRDTVVSGIEGAWTTNPTQWDMGYFEMLFGHEWELKKSPAGAWQWEPVSIKDDEMPVDVEDASIRHKPIMTDADMAMKVDPIYNQICQKFMADPA…
A3858_04895_ANS33601.1	ANS33601.1	CP015210.1	Rhodobacter sphaeroides	typical catalase Group 5	MAEDKPAARSGSFENLVSDYGAGGEFHQHAGEGDERLTTAQGVTIADNQNSLRSGAPGPTALEDFILREKIFHFDHERIPERVVHARGFGAHGLFECTKAIPEITRAAPFQKEGKITETFVRFSTVAGSKGSVDLARDVRGFAVKFYTDEGNWDLVGNNIPVFFIQDAIKFPDLIHSVKPEPDRGFPQAQSAHDNFWDFISLTPESMHMVMWQMSDRAIPRSFRFMEGFGVHTFRFINAEGQSSFVKFHWKPKLGMQSVLWDEALKINGADPDRHRRDLWEAITAGDFPEWELGLQIFDEEFANRFDFDVLDPTKIIPEELVPLTIVGTLTLDRVVDNFFAETEQVAFCTQNVVPGIDFTDDPLLQGRNFSYLDTQLKRLGSPNFTKLPINAPRGCPVH…
A3858_06885_ANS33973.1	ANS33973.1	CP015210.1	Rhodobacter sphaeroides	typical catalase Group 7	MTRMTTTAGAPIADNQNTLTAGPRGPVLLEDYQLIEKLAHQNRERIPERVVHAKGWGAFGTFTVTNDITRYSCAKVFSEVGKQTDLAVRFSTVAGELGAADHERDVRGFSVKMYTEEGNWDLAGNNTPVFFVRDPMKFPDFIHTQKRHPRTNLRSATAMWDFWSLSPESLHQVTILMSDRGLPVDPMHMNGYGSHTYSLWNAQGERFWVKFHWKTLQGHAHYTNAEAAEIVGRTREGYQEALFGAIEEGRFPKWRLMVQVMPEAEAETTPYNPFDLTKVWPHSDYPLIEVGVMELNRNADNYFAQIEQLAFSPSNKVPGIGYSPDKMLQARVFSYADAHRYRLGTHYEALPVNAPRCPVHHYHKDGQMNFFGHRTGAVDAYYEPNSVPGAAVEDPAVAE…
A3L23_00372_AMY51733.1	AMY51733.1	CP015235.1	Rhodococcus fascians D188	catalase-peroxidase Group 4	MSEDHVTREKEMNEDQPQESGGKCPVMHDAMPTPVEGGGNREWWPKALNLKILKKNPAVGDPMGADYDYAAEFNSLDLAEVKRDIEAVMTNSQPWWPADFGHYGPFFIRMAWHAAGTYRKQDGRGGAGAGMQRFAPLNSWPDNASLDKARRLIWPVKQKYGRKLSWADLIVLTGNVAIESMGLPTYGYAGGRVDAWEPDEDVYWGPEQTWLGDERYHGDRTSLENPLAAVQMGLIYVNPEGPNGNPDPVQSALDIRETFGRMAMNDIETAALAVGGHTFGKTHGAADPDAHIGPEPEGAPIEQMGLGWKNSFGTGSGADAITSGLEVIWTPTPTQWDNSFLETLYGFEWELYKSPGGAHQWRPKNGEGADLVPDPADPSKRRHPSMLTSDIAMRVDPIY…
A3L23_00952_AMY52305.1	AMY52305.1	CP015235.1	Rhodococcus fascians D188	Mn-catalase Group 10	MFRHTDYLQFDAKPEKPDPVYAHKLQELIGGAFGEMTVTMQYLFQGWNCRMEGKYKDLIMDIATEEMGHVEMLATMVARLLEGAPATESTKAAATDPVVAAVMGGMDPQQAIVSGGGALPADSNGYPWNGRYIIASGNLLADFRANVAAEAQGRLQTARLYNMSDDPGVKAMLQFNLARDTHHQNLWLAAIEELQADGLEDVVAPSALLDEEASEHATDLWHLSDGEFSSTGGWANRLAPDGKRQMGFLADPQPLGGKASAPAPDPKLYATYDGAKGDPASAALGTEKGVMGKIKDALDPDEK
A3L23_00960_AMY52313.1	AMY52313.1	CP015235.1	Rhodococcus fascians D188	catalase-peroxidase Group 4	MTSDARPPHSATETASTSESENPVIESPKPKAHAPLTNKDWWPEQMDLSILHAHTSKSNPFGEKLDYKAEFEKLDVDELKADVISVMTTSKDWWPADYGHYGGLFIRMSWHAAGTYRTFDGRGGGGQGAQRFAPLNSWPDNANLDKARRLLWPVKQKYGNKISWADLLVFAGNAALESMGFETFGFGFGREDIWEPEEVFWGPEDQWLGTDKRYSGERELSKPLGATTMGLIYVNPEGPEGEPDPVAAAHDIRETFARMAMNDEETAALIVGGHSFGKTHGAGPADKIGPEPEGAPIEQQGLGWKNGYGKGKAEDQITSGLEVVWTETPTQWGNGYLKNLYGYEWELTKSPAGAWQFTAKDGAGAGTIPDPFGGPGRAPTMLVTDISMRADPAYEKITR…
A3L23_01296_AMY52647.1	AMY52647.1	CP015235.1	Rhodococcus fascians D188	typical catalase Group 5	MPPIPRPDQSSPAPNGPTGARDTRAQTGDFLTTAQGVRLPDTDHSLKAGDRGPTLLEDFHLREKITHFDHERIPERVVHARGAAAHGTFESYGSAKTVTKAGFLAQKGKRTPVFVRFSTVLGSRGSADTVRDTRGFAVKFYTDEGTFDLVGNNMPVFFIQDGIKFPDIIHAGKPQPDIELPQAQSAHDSFWDFVSLHTEATHHVMWNMSDRGIPRSYRTMEGFGVHTFRLVAENGETRLVKFHWKPLAGVHSLVWEEAQIAAGVDPDFHRRDMSDGIKAGAPLEYEFGIQVMPDDGTETYEGIDLLDPTKIVPEELVPVQPIGKLTLDANPTNYFAETEQVAFHTGHLVPGIEVTNDPLMQARLFSYLDTQITRLGGPNFSQLPINRPHAPVNDMLRDG…
A3L23_02373_AMY53712.1	AMY53712.1	CP015235.1	Rhodococcus fascians D188	typical catalase Group 6	MTKPTTSKPTTSNSGIPVASDDQSLTAGAQGPILLHDHYLIEKMAQFNRERVPERVVHAKGAGAFGELEITGDISKYTKAKALQPGAKTEMLARFSTVAGEQGSPDTWRDPRGFSLKFYTEEGNWDLVGNNTPIFFVKDPIKFQDFIRSQKRMPDSGLRDNNMQWDFWTLSPESAHQVTWLMGDRGIPKSFRHMDGFGSHTYQLIAEDGTKTWVKFHFKTDQGIDFLTQDKADEVAGTSPDHHRQDLFGSIKNGDFPSWTLKVQLMPYDEAENYKYNPFDLTKVWSQKDYPLIEVGKMTLNRNPENFFAQIEQSSFEPSNTVPGIGFSPDKMLLGRVFSYADAHRYRIGANYAQLPVNAPKSEVNSYSKDGNMRYSFNSPETPVYAPNSFGGPSADTNK…
A3Q33_01790_ARD43157.1	ARD43157.1	CP014943.1	Colwellia sp. PAMC 21821	catalase-peroxidase Group 2	MFKKTLPLAAAISVALSSITLSSTALGADAAKTNQFWWPEQLNLSPLRQHGAESNPYGEQFNYAKEFATIDISQLKKDIETTLTDSKAWWPADWGHYGPLMIRMAWHSAGVYRVHDGRGGASGGQQRFDPLNSWPDNVNLDKARRLLWPVKQKYGRKISWADLMVLSGNVALESMGFKTFGFAGGRSDDWEPDLVYWGPETTMLDDKRRDKKGKLKGPLAAVEMGLIYVNPVGPHGNPDPLLAANDIRMSFGRMAMNDEEIVALIAGGHTLGKAHGAKKPENCVGAEPAAAAIEEQGLGWKNKCDSGVGADTTSSGLEGAWTVTPTQWSSNYLDNLMNFTWVQTKSPAGAIQWIPSDKAAANLVPDAHIANKRNAPIMFTTDLALKEDPSFLKIVQRFR…
A3Q33_08075_ARD44275.1	ARD44275.1	CP014943.1	Colwellia sp. PAMC 21821	catalase-peroxidase Group 3	MNDKKSTGGKCPVMHGGATESSMTNMEWWPKALNLDILHQHDRKTNPMDADFDYREAVKSLDIAALNKDLHELMTNSQDWWPADWGHYGGLMIRLSWHAAGTYRTADGRGGAATGNQRFTPINSWPDNANLDKARRLLWPIKKKYGNQLSWADLISYAGTIAYASMGLKTFGFAFGREDIWHPEKDTYWGSEKEWLAPSDSENSRYSGERDLENPLASVMMGLIYVNPEGVDGKPDPLKTAYDIRVTFERMAMNDEETVALTAGGHTVGKCHGNGDASKLGREPAAADISEQGTGWNNKTERGIGRDTVTSGIEGAWTTYPTQWDNGYFSMLLKHEWELKKSPAGAWQWQPVDIKEEDKPVDVEDPSIRTTPIMTDADMAMKMDPAYREISERFFNDPA…
A3Q34_03745_AOW76043.1	AOW76043.1	CP014944.1	Colwellia sp. PAMC 20917	catalase-peroxidase Group 2	MFNKTLPIAAAISVALSAMVIPTTAFAANEAKTNQFWWPDMLNLSPLRQHSAESNPYGEQFNYAEEFASLDLTQLKKDIQTTLTDSKSWWPADWGHYGPLMIRMAWHSAGVYRVHDGRGGSSGGQQRFEPLNSWPDNANLDKARRLLWPVKQKYGRKISWADLMVLSGNVALESMGFKTFGFAGGRTDDWEPDLVYWGSETTMLTDKRRDKKGKLKGPLAAVEMGLIYVNPEGPHGKPDPLLAAQDIRMSFGRMAMNDEEIVALSAGGHTFGKAHGAKKPSDCVGAEPAAADIEAQGLGWKNKCDSGVGADTITSGLEGAWTTTPTQWSTNYLDNLMNFNWVLTKSPAGAKQWTPENKAAVNLVPDAHIPNKRNAPIMFTTDLALKEDPEFRKIVERFR…
A3Q34_16360_AOW78276.1	AOW78276.1	CP014944.1	Colwellia sp. PAMC 20917	catalase-peroxidase Group 3	MNDKTTTTAGKCPVMHGGATKSSMSNMGWWPKALNLDILHQHDSKTNPMGANYNYRETLKDLDMAALKTDMHALMTDSQDWWPADWGHYGGLMIRMTWHAAGTYRIADGRGGAATGNQRFTPINSWPDNANLDKARRLLWPIKKKYGNKLSWADLIAYAGTVAYQSMGLKTFGFAFGREDIWQPEIDTYWGAEKEWLAPSGGEGSRYSGERDLENPLAAVMMGLIYVNPEGVDGKPDPLKTAHDIRVTFERMAMNDEETVALTAGGHTVGKCHGNGDASQIGPEPEAGDITEQGLGWNNKTKRGIGRDTITSGIEGAWTTHPTQWDNGYFSMLLNHEWELKKSPAGAWQWQPINIKEEHKPVDVEDATTRQTPIMTDADMAMKMDPAYREISERFSKDP…
A4249_12755_ANC54445.1	ANC54445.1	CP015511.1	Brevundimonas sp. GW460-12-10-14-LB2	catalase-peroxidase Group 4	MTDEAKCPFSGRTPRSVAGGGVQNRDWWPNQLRVDLLNQHSTKSDPLGESFDYREAFSKLDYEALKADLRALMTDSKDWWPADFGHYGPQFVRMAWHSAGTYRVGDGRGGGGRGQQRFAPLNSWPDNVNIDKSRRLLWPIKQKYGQAISWADLMILTGNVALETMGFRTFGFSGGRADTWEPDQDVYWGRETTWLGGDERYAHGSDGVVKPGDEAVLVSDDNADGDKHSRDLENPLAAVQMGLIYVNPEGPDGNPDPIAAARDIRDTFARMAMNDEETVALIAGGHTFGKTHGAGPADHVGAEPEADGLEAQGLGWASSFGSGHGGDAITSGLEVTWTQTPAQWSNFYFENLFGFEWELEKSPAGAHQWVAKDAGEIIPDAHDPSKKKRPTMLTTDLSM…
A4R43_00875_AXB41245.1	AXB41245.1	CP015163.1	Amycolatopsis albispora	catalase-peroxidase Group 4	MSSTEDTPASAQGVDQKAAAGCPVAHDSVTSHGSESENPAIDSPTPKTGGRPRTNRDWWPNQLDLSVLHAHSSKGNPLGPDFSYAKEFAKLDVDALKRDITEVLTTSQDWWPADFGHYGGLMIRMSWHAAGTYRIHDGRGGAGDGGQRFAPLNSWPDNANLDKARRLLWPVKEKYGQKISWADLLVLAGNVALESMGFKTFGFGFGREDVWEPEEIFWGPEDDWLGDERYVSDAEMVPDVGATEMGLIYVNPEGPRGNADPAAAAHFIRETFGRMAMNDEETVALIAGGHTFGKTHGAAVADDHVGPEPEAAPLEAQGLGWLNTHGTGKGADTITSGLEVTWTDVPTQWSNRFFEILFGYEWELTTSPGGAKQYVAKDAEPIIPDAHDPAKKHKPTMLT…
A4R43_07605_AXB42409.1	AXB42409.1	CP015163.1	Amycolatopsis albispora	Mn-catalase Group 10	MFRHTKLLQFEAKPEKPDAVYARKLQELIGGAYGEMTVTMQYLFQGWNCRMEGKYKDLIMDTATEEIGHVEMLATMVARLLEGAPATATAEAVKDPVMAAVLGGMDPQQAIVAGGGAMPNNAQGVPWMGSYIVASGNLLADFRANAAAEAQGRLQTARLYNMTDDPGVKEMLKFNLARDTVHQKQWLAAIAELEADGLEDTPIAPNTLFDEEDQTHNNTIWHLSDGPDGASGGWSKGEQAIEYLMEPKPLGGPGTAPKPDPALYGTYSAAKDAAGTVKGKAKEAKNKLK
A4R43_08010_AXB42475.1	AXB42475.1	CP015163.1	Amycolatopsis albispora	typical catalase Group 5	MTESRENTKQEQLDRFREDQRNTVLTTQQGVRAGHDDDSLTAGARGPTLLEDFHAREKITHFDHERIPERVVHARGAGAYGYFEAYDNSLSEYTTAEFLTSGERIPVFVRFSTVAGSRGSADTVRDVRGFATKFYTRQGNYDLVGNNMPVFFIQDGIKFPDFVHAVKPEPHNEIPQAQSAHDTLWDFVARQPETMHMMMWLMSDRALPRSYRMMQGFGVHTFRLVNADGRGTFVKFHWKPVAGTHSLLWDECQKIAGKDPDFNRRDLWESIEAGRFPEWELGVQLVAEDAEHTFDFDLLDPTKIIPEEEVPVRPVGHLVLDRNPDNFFAETEQIAFHTANVVPGIDFTNDPLLQARNFSYLDTQLIRLGGPNFSQLPVNRPVAPVATNQRDGYGQQAIH…
A4R43_19715_AXB44465.1	AXB44465.1	CP015163.1	Amycolatopsis albispora	catalase-peroxidase Group 4	MSDTPDAVVGEMNVESAGGCPVSAGRFKHPTEGGSNREWWPNQLNLKILRKHSAVANPMDEEFDYAKAFATVDLDELAKDVDALLTSSQEWWPADFGHYGPLMIRMAWHSAGTYRIDDGRGGAGAGMQRFAPLNSWPDNGNLDKARRLLWPVKKKYGKSVSWADLMIFAGNRALETMGLETFGFAGGRADVWEPDEDVYWGPERTWLGDERYSGDRQLESPLAAVQMGLIYVNPEGPNGNPDPLAAARDIRETFGRMAMNDEETVALIAGGHTFGKTHGAADPDQYVGPEPEGAPLEEQGLGWKNTFGSGKGRDAITSGLEVTWSPTPTRWSNWFFHNLFTYEWELTKSPAGANQWKPKNNAAKGTVPDPESGALDRAPSMLTTDLALRFDPVYEQISR…
A4R43_27305_AXB45737.1	AXB45737.1	CP015163.1	Amycolatopsis albispora	typical catalase Group 6	MTKPTTNNVGIPVASDNDSLTLGANGPILLQDHYLIEKNAQFNRERVPERVVHAKGGGAFGFLEVTEDVSQFTKAALFQPGTRTESVIRFSSVAGENGSPDTWRDPRGFAVKFYTSQGNYDLVGNNTPVFFIRDPIKFPDFIHSQKRRADNHLRDHNMQWDFWTLRPESAHQVTWLMGDRGIPSNWREMNGYGSHTFLWENAGGEKFWVKYHFKTDQGIGYLTQAEADRIAGEDADYYIRDLFKNIEKGNHPSWTLYVQVMPYAEAADYRFNPFDLTKVWPQGDYPLIKVGRYVLDRNPSNYFAEIEQAAFEPANLVPGIGPSPDKMLQGRLFAYPDAHRYRIGANYTQLPVNAPKSPVNSYSRDGQMRFNNPGDPVYAPNSFGGPHADASLASETASS…
A4R89_10710_AOW49795.1	AOW49795.1	CP015168.1	Acetobacter pasteurianus subsp. paradoxus	typical catalase Group 5	MAVKKNTASKAAKNGLKADKDKFEPSSYNEQQGNGGETHQQAGDDVATLTSAQGIPVADDQNTLRYGARGPALMEDFHFREKIFHFDHERIPERVVHARGYGAHGYFELTDSLQDVTRAAIFQNVGERTPAFVRFSTVAGSKGSFDVARDVRGFAVKLYTKEGNWDLVGNNIPVFFIQDAIKFPDMVHSVKPAPDRDFPQAQSAHDNFWDFISLSPESFHMIMWVMSDRSIPRSFRFMEGFGVHTFRFLDSNDRSTFVKFHWKPKQGLQSVVWNEAVKINGADPDFHRRDLWSAISSGDFPEWELGVQLFDEEFAEKFDFDVLDPTKLIPEELVPVRIVGRLVLDRVVDNFFAETEQVAFCTQNVPPGIDFSNDPLLQGRNFSYLDTQAKRLGSPNFTH…
A4U64_04335_ANZ24007.1	ANZ24007.1	CP015529.1	Rhodococcus sp. WB1	typical catalase Group 5	MFEKNPPVPGSPAGFEVPVEEPTTPTDPPPAKPDQREPIPVTATGTPEDLPDGARGPQGRYLTTAQGARLTDTDHSLKAGRRGPTLLQDHHFREKITHFDHERIPERAVHARGAAAHGVFRANGAASKITRAGFLQKGAETPVFVRFSTVLGSRGSADTVRDTRGFATKFYTEEGTFDLVGNNIPVFFIQDAIKFPDVVHAAKPHPDREIPQAQSAHDTFWDFVSLHTEATAHTLWNMSDRGIPRSYRMMEGFGVHTFRMVNADGETSLVKFHWKPRLGVHSLVWEEAQLLGGIDPDFHRRDLADAIEAGAYPEWDLGVQVFPDTPEQTFEGIDLLDPTKIVPEELAPVQLIGTMQLNANPTNFFAETEQVAFHPGHLVPGIDVTDDPLLQGRLFSYLD…
A4U64_21690_ANZ27008.1	ANZ27008.1	CP015529.1	Rhodococcus sp. WB1	typical catalase Group 6	MTNPRPTTNNVGIPVASDDESLTAGTQGPVLLHDHYLIEKLAHFNRERVPERVVHAKGGGAFGELVVTGDVSAYTKAKLFQPGAKTESLVRFSTVAGEQGSPDTWRDPRGFAVKFYTEDGNYDLVGNNTPVFFVKDPIKFPDFIHSQKRLPGSGLRDHTMQWDFWTLRPESAHQVTWLMGDRGIPRTWRHMDGFGSHTYQWVNAAGERFWVKYHFKTNQGIEFLTQDEADRLAGTDPDYHRADLHDAIERGEFPSWTLKVQIMPVAEAEGYRFNPFDLTKVWSQRDYPLIEVGTWTLNRNPRNFFAEIEQAAFAPSNIVPGIGLSPDKMLLGRVFSYADAHRYRIGANHAQLPVNAPRNEVNSYSKDGAMRYSFNDPGTPVYAPNSFGGPHADPQAAGD…
A4U64_24635_ANZ27504.1	ANZ27504.1	CP015529.1	Rhodococcus sp. WB1	catalase-peroxidase Group 4	MSNSESENPVIPSPEPKPHRPRTNRDWWPNQLDLQVLHQHSPLSNPMGPDYNYAEEFATLDVEALKQDIFELMTTSQEWWPADYGHYGPLFIRMSWHAAGTYRIADGRGGGGKGAQRFAPLNSWPDNASLDKARRLLWPIKQKYGRKLSWADLLIFAGNCAYESMGFKTFGFGFGREDIWEPDEVFWGPEDTWLGDERYAGDRELSGPFGAVQMGLIYVNPEGPNGNPDPIAAARDIRETFGRMAMNDVETAALIAGGHSIGKTHGAATADHVGPEPEAAPIEQQGLGWKNSFGTGVGGDAITSGLEGAWTPTPRQWDNSFLETLYGYEWEKTKSPAGAWQWIPKDGAGADAVPDAHDPSKRHSPVMLTTDLSLRLDPIYGPITRRWLDNPKEFEEEFA…
A4U64_24860_ANZ27545.1	ANZ27545.1	CP015529.1	Rhodococcus sp. WB1	typical catalase Group 7	MTDHNGLTTAAGAPVPDNQNSLTAGARGPMLLQDVWFLEKLAHFDREVIPERRMHAKGSGAFGTFRVTHDITRHTRAAVFSAVGKQTEVFVRFSTVAGERGAADAERDIRGFAVRFYTEEGNWDVVGNNTPVFFFRDPLKFPDLNHAVKRDPRTNLRDPENNWDFWTNLPEALHQVTIVMSDRGIPDGYRHMHGFGSHTFSFVDAEGTRSWVKFHFRTQQGIRNLTDEEAAAVIAGDRESAQRDLYEAIESGNHPKWTLYVQIMPEADAATYRYHPFDLTKVWSKKDYPLIEVGELELNRNPDNYHADVEQAAFSPANIVPGIGFSPDRMLQGRLFSYGDAARYRLGVNHHQIPVNCPRAAAHVNSFHRDGAMRVDGNQGSVPSIEPNSYGRFREQPEY…
A4U99_12110_ANU41759.1	ANU41759.1	CP015406.2	Flavonifractor plautii	Mn-catalase Group 02	MFKHEKQLFHPVEVEQPNPQYAALLQEQLGGGNGELKAAMQYMSQSFRIRNPKIKDLFMDIAAEELSHMEMVAQTINLLNGHDVEADKVQAGEIETHVLLGLNPGLINASGYSWTADYVTVTGDLCADLLSNIASEQRAKVVYEYLYRQIEDKKVRETIDFLLNREEAHNQMFRDAFNEVQDSGSNQDFGTTKAAKMYFSLSNPGPNAFAGNEVSAPKFAK
A4V01_15350_ANU70226.1	ANU70226.1	CP015404.2	Erysipelotrichaceae bacterium I46	Mn-catalase Group 02	MFEHKKKLLHPVKVERPNPQYAVLMQEQLGGCNGEVKAAMQYLSQSFRAKDPVFKDLFLDIGTEELSHMEMVAETINLLNGGDVDYKKVDAGEIETMVTFGLNPALVNSSGNPWTADYVTVTGDLAADLLADIASEQRAKVVYEYLYRQIDDKYVKETIMFLLEREEAHNALFCEALNKITDDGSNKSFGMSEDSRLYFDLSKPGRYFDDPDPKAPKMANAKDSKSTKSKSKKK
A4W93_00930_ARN18593.1	ARN18593.1	CP015118.1	Rhizobacter gummiphilus	typical catalase Group 5	MAKKPAPAPQTAPVSKPASGSKSAAKSAARNTDSGPANPSPAPDNDMPALKAEHTQSLAEAFPFNATKAGEHGMAAGMKPQPGATAVPRSRLPTGSTLSEAQTSPKVGTTAAAGRNATIGALERVRVDSTGQVLTTNQGVAIADNQNSLKAGVRGPVLLEDFILRDKLTHFDHERIPERIVHARGSAAHGYFECYEALTELTRAAPFQEAGKVTPVFVRFSTVAGERGSKDTARDVRGFAVKFYTDEGNWDLVGNNIPVFFIQDAMKFPDLVHAVKPEPHHAMPQAASAHDTFWDFVSLMPESTHMLMWAMSDRAIPRSYATMQGFGVHTYRMVNAEGDSVFVKFHWSPKAGTHSLTWDEAVKISGADPDYHRRDLWERIEGGAYPEYELAIQVFTEEQ…
A4W93_27265_ARN23308.1	ARN23308.1	CP015118.1	Rhizobacter gummiphilus	typical catalase Group 7	MTDTTRLTTASGIPVADNQNSVTAGPRGAVLLQDFHLIEKLQHFNRERIPERVVHAKGSGAYGTFTVTHDITKYTKAKLFGAVGKTTETFLRFSTVGGEKGSADTERDPRGFALRFYTEEGNWDLVGNNTPTFFLKDGIKFPDFIHTQKRDPQTNLKSPTAVWDFWSRTPESLHQVTILFSDRGTPDGYRHMDGFGSHTFSLINAAGERVWCKWHLKTRQGIRNLDAAEAQRLAGTDPDYAQRDLFNAIANGDFPQWDVYVQVMREDQVAAWEARTGWSAFDLTKVWPHADFPRIPVGVLELNRNPDNYHAEVEQAALSPSHIVPGLGFSPDKMLQSRLFGYHDAQLYRVGTNHQQLPVNRPRCPVHHQQRDGYMAVDNGGAARNYDPVQAGGSNPSGL…
A4W93_27270_ARN23309.1	ARN23309.1	CP015118.1	Rhizobacter gummiphilus	catalase-peroxidase Group 3	MNAESKCPVAHTPARARTNVQWWPDALNLALLHQHSTLADPMVEDFDYRKEFLTLDLKAVTADLHALMTDSQDWWPADYGHYGPLFIRMAWHAAGTYRIFDGRGGARSGEQRFAPLNSWPDNGNLDKARRLLWPIKQKYGRKLSWADLMILTGNVALESMGFKTFGFGGGREDIWEPPAIDWGPESTWLGDERYSGERELANPLAAVQMGLIYVNPEGPNGNPDPAGSGRDVRETFARMAMNDEETVALTAGGHTFGKCHGAGDASLVGKEPEGANVEELGLGWKSTFESGIGAHAITSGLEGAWTPNPIQWDNGYFETLFGHEWELTKSPAGANQWKPKGTTGDGKVPDAHIPGKRHAPMMTTADMAMRVDPAYEKISRRYMADPALFADAFARAWFK…
A4Z71_01175_AOY55651.1	AOY55651.1	CP015208.1	Candidatus Rhodoluna planktonica	catalase-peroxidase Group 3	MESTGSCPVVHGAQTSTGKSNMDWWPNALNLDILHQHDTKTNPLGQSFNYREEVKKLDVAALKKDLENLMTDSQSWWPADWGHYGGLMIRMAWHSAGTYRTADGRGGAATGNQRFAPLNSWPDNVNLDKARRLLWPIKKKYGNKLSWADLMILAGNVAYESMGLKTFGFAFGREDIWHPEKDIYWGSEAEFLAPSENRYENINDPSTLENPLAATHMGLIYVNPEGVNGQPDPLKTAAMIRETFGRMAMNDEETVALAAGGHTVGKAHGNGDAGNLGPNPEAADIHEGGLGWMNHKTRGVGRDTVSSGIEGAWTTNPTKWDNGYFYLLFNYDWQLVKSPAGAWQYEPVNIKEEDKPVDVEDPSIRLMPMMTDADMAMIKDPIYREISERFYNDQNYFSE…
A5892_13920_ANF59685.1	ANF59685.1	CP015243.1	Halotalea alkalilenta	typical catalase Group 5	MTARNSDGPHDTDFTTSEDSKHDALERWRSNAKGHDLRTNQGVRISDNQNSLKAGDRGPTLLEDFIMREKINHFDHERIPERIVHARGAAAHGYFEPYEAAAKLSKAGLFKDPGKRTPVFVRFSTVQGARGSNDTVRDVRGFATKFYTDEGIWDLVGNNMPVFFIQDAIKFPDFVHAVKPEPHNEIPQGQSAHDTFWDFVSLVPESAHMVLWTMSDRAIPRHYRSMEGFGIHTFRLIDKQGVSRFVKFHWKPLAGTYSLVWDEAQKLWGRDPDFHRRALHDDIENGDFLEWEFGVQVVEEEDEHKFDFDLLDPTKIIPEELVPVTPIGKMVLNRNPDNYFAEVEQVAFNPGSVVPGIDFSNDPLLQGRLFSYLDTQMLRLGGPNFAEIPINRPVCPVHN…
A5892_13930_ANF58431.1	ANF58431.1	CP015243.1	Halotalea alkalilenta	typical catalase Group 7	MSERTRYTTGNGAPVPNDDASFTAGPRGPLTFDNWRLFEKLAHFNREQIPERVVHARGSGAFGTFRLTRDLSDLTIADFLQGIGKETPVVARFSTVAGGQDSADNLRDVRGFSVKFYTEQGNWDMVGNNTPVFFIREPSKFPDFIHTQKKDPRSNLVNWQNRWEFWALHPQSFHQVTILLSDRGIPYSYRHMHGFSSHTLSLWNDSGERVWVKFHFKTNQGIKNVTDEEALSLDPAHHQHDLFTHIEKGEFPSWTVKIQLMSEEEAKHYRINPFDLTKVWPQGEFPLIEIGQLELNRNPDNYFAEIEQVAFSPSNFVPGIGASPDRVLQSRLWAYADAHRYRLTVNYQQIPVNRPLAPVNNYQRDGFMAGLGERREGESKEGGQYSTTNFYPNARGEAG…
A5CBH24_22880_BBL04975.1	BBL04975.1	AP019735.1	Alistipes sp. 5CBH24	typical catalase Group 7	MEKKERSRPSGKTQGKPEKLTSVNGRPIADNEDSQTAGLRGPIVLQDPWMLEKLAHFDREVIPERRMHAKGSGAYGTFTVTHDITRYTRASIFSRIGKQTECFVRFSTVAGERGAADAERDIRGFAMKFYTDAGNWDLVGNNTPVFFLRDPVRFPDLNHAIKRDPRTGMRSVDNNWDFWTLLPEALHQVTITMSTRGIPASFRHMHGFGSHTYSFYDAENRRTWVKFHLRTMQGIRNLTDAEAEAIIAKDRESHQRDLFEAIERGDFPRWLFQIQTMTEEEARNYRINPFDLTKVWPHGDFPLQDVGILELNRNPENFYAEVEQAAFNPLNIVDGIGFSPDKMLQGRLFSYGDAQRYRLGVNLDQIPVNRPRVAVHSYHRDGAMRVDGNFGATVSYTPN…
A5CPYCFAH4_01770_BBL07953.1	BBL07953.1	AP019737.1	Alistipes sp. 5CPYCFAH4	typical catalase Group 7	MDKKKQLTAENGRPIADNQNIQTAGVRGPVTLQDPWFLEKLAHFDREVIPERRMHAKGSGAFGTFTVTQDITEYTRASIFARVGKKTECFVRFSTVAGERGAADAERDIRGFAMKFYTDAGNWDLVGNNTPVFFLRDPLKFPDLNHAVKRDPRTNLRSANNNWDFWTLLPEALHQVTITMSPRGIPASYRHMHGFGSHTYSFYDKDNKRTWVKFHLTTQQGIRNLTDAEAEALVGKDRESHQRDLYESIERGDFPRWTMYVQLMTEEEARNYKLNPFDLTKVWYHKDFPLHEVGVLELNRNPENYYADVEQAAFNPMNIVEGIGFSPDKMLQGRLFSYGDAQRYRLGVNHTEIPVNRPRCPIHAFHRDGQMRTDGNYGSAKGYEPNSYGEWQDTPALKE…
A5NYCFA2_01770_BBL10744.1	BBL10744.1	AP019738.1	Alistipes sp. 5NYCFAH2	typical catalase Group 7	MDKKKQLTAENGRPIADNQNIQTAGVRGPVTLQDPWFLEKLAHFDREVIPERRMHAKGSGAFGTFTVTQDITEYTRASIFARVGKKTECFVRFSTVAGERGAADAERDIRGFAMKFYTDAGNWDLVGNNTPVFFLRDPLKFPDLNHAVKRDPRTNLRSANNNWDFWTLLPEALHQVTITMSPRGIPASYRHMHGFGSHTYSFYDKDNKRTWVKFHLTTQQGIRNLTDAEAEALVGKDRESHQRDLYESIERGDFPRWTMYVQLMTEEEARNYKLNPFDLTKVWYHKDFPLHEVGVLELNRNPENYYADVEQAAFNPMNIVEGIGFSPDKMLQGRLFSYGDAQRYRLGVNHTEIPVNRPRCPIHAFHRDGQMRTDGNYGSAKGYEPNSYGEWQDTPALKE…
A6024_13950_ANB38924.1	ANB38924.1	CP015421.1	Rhodovulum sulfidophilum	catalase-peroxidase Group 3	MDGNDRPAGTCPVLHATFGGQSNRDWWPNQLNLRILHQNPSAANPMQPGFSYAEAFGALDLNAVKSDLRALMTESQDWWPADYGHYGGLFIRMAWHSAGTYRTADGRGGGGTGNQRFAPLNSWPDNVNLDKARRLLWPVKKKYGNAISWADLMILAGNVALETMGLRTFGYAGGREDIYEPEEDIYWGSEREWLATSDKPQSRYSGDRDLESPLAAVQMGLIYVNPEGPDGNPDPLASGRDIRETFARMAMNDYETVALTAGGHTFGKCHGAGDAALLDAEPEAAPLQAMGLGWLSRHGSGKGADAITSGIEGAWTPNPTTWDMGYFDVLFGYDWELTKSPAGAWQWTPKDLKPEDHAPDPKTGERNRKIIMTTADMAMRMDPIYEPIARHFHENPDEF…
A6035_00390_AWH90890.1	AWH90890.1	CP015449.1	Dietzia lutea	typical catalase Group 5	MPDKRSDSKSAARSAAEKIVDKAEELADDLVGAADVVPGTPGSRPPTVDEPTEPTSPLPPKADQKGATPYGPTGAEPPGSVTAREEVMRQQGAFLTTAQGARVSDTDHSQKAGRRGPVLLQDHHLREKIMHFDHERIPERVVHARGAGAHGVFRANGAAASVCKAGVFAEGKETEVFVRFSTVLGNRGSADTVRDTRGFATKFYTDEGTWDLVANNIPVFFIQDAIKFPDVIHAGKPHPDREIPQAQSAHDTFWDFVSLHTEAQHHTMWNMSDRGIPRSYRMMEGFGVHTFRLINAAGETSLVKFHWKPHLGVHSQVWEEAQITAGMDPDFHRRDLADAIEAGAFPKWDLGIQVFPDTVDENGVSEMFHGIDLLDPTKIVPEELAPVQVIGTLELNANV…
A6035_01165_AWH91018.1	AWH91018.1	CP015449.1	Dietzia lutea	Mn-catalase Group 10	MFIHKQKLQFQSKPEKPDAVYARKLQEVIGGQYGEITVAMQYSFQAWNAHIPGKYRDLLFSTAAEEFGHVEMLATMVAQLLEDAPLGITEAAVQNDPAVAAVIGGTDVQHGIVAGAGARPVDSMGNPWSGSYVTASGNLLADMWSNVNAESQGRVQVARLYHMTDDPGIRELLSFLLARDTMHQNQWLAAVNELQAEGLEELPVPSNFPKSKEAAEHAYTMYNFSDGAAAAEGSWASGPTPDGHGEFSYSPEPLEGPPMPPPTHPDARFYGTTELPNTVEKAAGTVQDKLNKE
A6035_02575_AWH91234.1	AWH91234.1	CP015449.1	Dietzia lutea	typical catalase Group 6	MTVHPADRGVRDFQPGSHTTTDSGQPVPNDEFSAQVGQQGPQPIHDFYLIEKLAHFNRENIPERLPHAKGSGAFGEFVTTEDISDITCAGLFQKGVKTPMLARFSTVAGEKGSPDTWRDPRGFALKFYTEEGNYDLVGNNTPIFFIRDAIKFPDFIHSQRRKNASGLRNHAMQWDFWTLSPESTHQVTWLMGDRGIPKTWRHMDGFGSHTYQFINAEGVRHWVKFHFKTNQGIDFLTQAEADKLAGENADYHREDLYESIKNGDYPSWDLHVQVMPVDEAETYRYNPFDLTKTWSQRDYPLRKVGTMTLNRNPQNHHAQIEQAAFAPTNIVKGIGFSPDKMLLGRVFAYPDIQRYRIGANYQQVPVNRPLSPVNSYSKEGAMQFEFPHPAQAEYHPNTI…
A6035_14525_AWH93194.1	AWH93194.1	CP015449.1	Dietzia lutea	typical catalase Group 3	MSEERRHDDPILTTRQGHPVHDNQNTRTVGARGPATLENYQFLEKISHFDRERIPERVVHARGFVAYGEFEATGKWGDEPISKYTRAKLFQEPGKKTDVAIRFSTVIGGRDSSEVARDPRGFAVKFYTEDGNWDLVGNNLGVFFIRDAIKFPDVIHSLKPDPITFRQDPARIYDFMSQSPEAMHMLVNLFSPRGIPADYRHMQGFGVNTYRWVNAEGESHLVKYHWLPHQGVKSLTEEDAANIQAHDTGHASKDLYEAIENGDYPKWDLVVQMMSDDDHPELDFDPLDDTKTWPENDFEPKLVGTMTLNRNVTDHHNENEQISFGTGVLVDGLEFSDDKMLVGRTFSYSDTQRYRVGANYLQLPVNSAKNATVATNQRGGSMSYGVDLQGQNPHVNYEP…
A6048_00360_AWH94220.1	AWH94220.1	CP015453.1	Dietzia psychralcaliphila	typical catalase Group 5	MSDKKSAASKTAGAAAKKVADAAGKLADEVIGGGDVVPGVPAPTPPSLEEPTSPTGPLPPKPDQKGATPFSPTGAESADTEDAARQQGEFLTTAQGARLTDTDHSQKAGRRGPTLLQDHHLREKITHFDHERIPERVVHARGTGAHGVFTANGAAASVCRAGLFAEGKETEVFVRFSTVLGSRGSADTVRDTRGFATKFYSEEGTWDLVGNNIPVFFIQDAIKFPDVIHAGKPHPDREIPQAQSAHDTFWDFVSLHTEGQAHAMWNMSDRGIPRSYRMMEGFGVHTFRLINAAGETNLVKFHWKPHLGVHSLVWEEAQIAAGMDPDLHRRDLADAIEAGAFPSWDLGIQVFPDTVDENGVSEMFHGIDLLDPTKFVPEELAPVQIIGTMTLNANNKNFF…
A6048_02270_AWH94526.1	AWH94526.1	CP015453.1	Dietzia psychralcaliphila	typical catalase Group 6	MTTHPADRGVRDFQPKSATTTDSGQPVPSDEFSARLGELGPQPIHDFYLIEKLAHFNRENVPERLPHAKGSGAFGEFETTEDVSDITCAGLFQKGVKTPMLARFSTVAGEKGSPDTWRDPRGFALKFYTDEGNYDMVGNNTPVFFVRDALKFPDFIHSQRRKNASGLRNHAMQWDFWTLSPESTHQVTWLMGDRGIPATWRHMDGFGSHTYQFINAAGVRHWVKFHFKTNQGIDFLTQDEADKLAGENADYHRQDLYESIGKGEFPSWDLHVQVMPVDEAQGYRFNPFDLTKVWSQKDYPLRKVGTMTLNRNPQNHHAQIEQAAFAPTNIVKGIGFSPDKMLLGRVFAYPDIQRYRIGANYQQVPVNRPLSPVNSYSKEGAMQYEFPHPAQAEYAPNTI…
A6122_2425_AND17541.1	AND17541.1	CP015515.1	Rathayibacter tritici	Mn-catalase Group 05	MMFFHVQRLINDIEQDEPDPAAANALQEGLGGQFGEMRTMMQYLFQAMNFRGADAKPYRDLIQGIGTEEISHVELIGTTISRLLDGSPRYQGKPTDPLDTPGAGGATPLSIALDTSNIHHYLVGAQGALPVDAAGNPWSGSYVYNSGNLVLDLLYNLMLESTGRLQKCRIYEMTDNKTARSTIAYLIVRDQAHENGYAKALETLGVDWKKTLPIPKTNAEKFPEVKKLVDLGLQSKQYTFDLDGASEAGKIYRGASPSNDGTDLESKEQAPEGVPSVIAPERFEEFSPGLDPELLKLIQTTAEMELDEISSFYGPTAK
A6122_2641_AND17755.1	AND17755.1	CP015515.1	Rathayibacter tritici	typical catalase Group 6	MTEERFTTTNSGAPVASDDHSLSVGADGPLALHDHYLVEKLAQFNRERIPERVVHAKGGGAFGLFTTTADVSAYTRAALFQPGVETEMLARFSTVAGEQGSPDTWRDPRGFALKFYTSEGNYDLVGNNTPVFFLRDGIKFPDFIRSQKRLPGSHLRDHDMQWDFWTLSPESAHQVTWLMGDRGLPSSWRHMDGFGSHTYQWINAAGERFWVKYHFKTDQGVEILTQEQADQIAGEDADFHIRDLSSAIDRGDFPSWTLSVQVMPYEDAKSYRFNPFDLTKVWPHSDYPLIEVGTMTLDRNPENYFAQIEQAAFAPSNFVPGIAASPDKMLLARIFSYADAHRYRVGTNHAQLPVNAPKSPVHSYSKDGPMRFDFQKSEVPVYAPNSQGGAHADPARAAE…
A6122_2667_AND17780.1	AND17780.1	CP015515.1	Rathayibacter tritici	Mn-catalase Group 10	MLPAFVKPLLALQLGCLASKTQTSDVRVRLRPATPERYERYFVMFFHRQELQFTASPSKPDAVFARRFQEVLGGQYGEITVAMQYGFQAWNSHDPGKYRDLLFGIGAEEFGHVEMIAVMIAQLLEKAPIEQSEDAMKKDPVLAAVIGGSDVQHAIVAGAGVRPVDSMGNPWQGSYITASGNLLADFTANANAEMQGRLQVARLYHMTDDHGVRDLLSFLLARDTMHQNQWIAAAAELRAEGKEDLPVPSNFPISKEERSVSYEYINFSDGAAAADGTWASGPTPDGKGEFSYRVAEPGGGVPMPPPTQPDERFYGTDPKPNLVEKAVGAVKDAVTGK
A6A11_08610_QLB13665.1	QLB13665.1	CP016605.1	Bisgaardia hudsonensis	typical catalase Group 7	MSKCPFDHNSTTLTNAAGNPVVDNDNTMSAGPKGPLLLQDVWFQEKLAHFVRERIPERVVHAKGTAAFGTFTVTNDISKYTKAALFSEVGKKTDVLLRFSTVAGERGAADAERDVRGFSLKFYTEQGNWDLVGNNTPVFFIRDPLKFPDFIHTQKRNPQTNLRDANAAWDFWSRHPESLHQIMTLFSDRGIPATLRHMNGYGSHTYSFVNANNERFWVKFHFKTQQGHKFFTNEEAAKVVGENRESSQQDLYESIAKGDFPRWNVQVQIMPEADAHKHNYSFDLTKVWPHSDYPVIDVGVLELNRNPENYFAEVEQAAFAPSNIVPGIGFSPDRMLQGRLFSYQDAQRYRLGVNHHQIPVNAPKCPYHTTHRDGAMRVDNNGGTHPNYAPNRFDTYVPT…
A6C57_05120_ARK09763.1	ARK09763.1	CP015317.1	Fibrella sp. ES10-3-2-2	typical catalase Group 5	MHTQQNRDNTNDKLEELNQNREDGSGQFLTTNQGLRVNDDQNSLKAGDRGATLLEDFILREKITHFDHERIPERIVHARGAAAHGYFQVYEPQAELTKAKFLQDPSKKTPVFLRFSTVAGSRGSSDLARDVRGFAVKFYTEEGNFDLVGNNIPVFFIQDAIKFPDLIHAVKPEPNNEIPQAASAHDTFWDFISITPESMHMIMWVMSDRSIPRSYRMMEGFGVHTFRFINEAGKARFVKFHWKPLLGVHSVVWDEAQLISGRDPDFHRRDLWDSIEAGAYPEWELGVQIVEEEDEHKFDFDLLDSTKLIPEELVPVKRIGKLTLNRNPDNYFAETEQVAFHLGHLVPGLDFTNDPLLQGRLFSYTDTQLKRLGGPNFHEIPINRPIAPVHNGQRDGHMR…
A6C57_08155_ARK10303.1	ARK10303.1	CP015317.1	Fibrella sp. ES10-3-2-2	Mn-catalase Group 07	MILKMDRLPIELPTPTNPSANDAAAVQELLGGKFGEMSTLMNYTYQSFNFRGRKKLRPFYDLICSIAGEEYGHIEVVSYTINLLLTGVSKRGIDPTIAPLADGVNARNTYHFNSSGQTALPMDSMGKFWSGDNVFSSGNLKLDLLHNFFLECGARAGKMRTYEMVSDPTAREMVGYLLVRGGLHVVAYAKALELLTGVEVTKLLPIPDLSNDKFPEAKKHMENKLHLKLYTFSQEDYTQVGQIWHGNHPEDGQPLEVIQGAIPGHPVPDLDEEPQLNAPGSDEYAYDPQMFADMAKKMGIKP
A6C57_12480_ARK11075.1	ARK11075.1	CP015317.1	Fibrella sp. ES10-3-2-2	catalase-peroxidase Group 4	MEKIGSQETQDPSVWDVNDDSHVNTVGKCPFLGGELNKSAGGGTRNRDWWPNQLKLNILRQHSSLSDPMGEGFNYAEEFKSLDLAAVKQDIVNLMTDSQSWWPADFGHYGPFFIRMAWHSAGTYRIGDGRGGSGSGMQRFAPLNSWPDNTNLDKARLLLWPIKQKYGKKISWADLMILTGNCALESMGFKTFGFGGGREDMWEPEEDVYWGSETEWLGDTVRYASSNGTRNLEQPLGAANLGLIYVNPEGPAGNPDPLAAAYDIRETFGRMAMNDEETVALIAGGHTFGKTHGAADPGKYVGSEPEGAAIEEMGLGWKNSYGTGNGADTITSGLEVTWTTKPTQWTNEYFDHLFAFDWELTKSPGGAHQWKPKNEAGAGTVPDAHDPSKRHQPTMLTTD…
A6CPBBH3_11200_BBL14481.1	BBL14481.1	AP019739.1	Alistipes communis	typical catalase Group 7	MEKKERSRPSGKTQGKPEKLTSVNGRPIADNEDSQTAGLRGPIVLQDPWMLEKLAHFDREVIPERRMHAKGSGAYGTFTVTHDITRYTRASIFSRIGKQTECFVRFSTVAGERGAADAERDIRGFAMKFYTDAGNWDLVGNNTPVFFLRDPVRFPDLNHAIKRDPRTGMRSVDNNWDFWTLLPEALHQVTITMSTRGIPASFRHMHGFGSHTYSFYDAENRRTWVKFHLRTMQGIRNLTDAEAEAVIAKDRESHQRDLFEAIERGDFPRWLFQIQTMTEEEARNYRINPFDLTKVWPHGDFPLQDVGILELNRNPENFYAEVEQAAFNPLNIVDGIGFSPDKMLQGRLFSYGDAQRYRLGVNLDQIPVNRPRVAVHSYHRDGAMRVDGNFGATVSYTPN…
A6F65_02544_ANU08822.1	ANU08822.1	CP016545.1	Altererythrobacter namhicola	catalase-peroxidase Group 3	MDAATGSISGGGCPFHGDGGARALLGRTNRDWWPDALDLEILTQGGKNADPLGEDFDYAEAFNAIDYNALKADLTALMTDSQEWWPADYGHYGPFFIRMAWHAAGTYRTGDGRGGSSSGQQRFAPLNSWPDNGNLDKARRLLWPIKQKYGKNISWADLFILTGNVAIESMGGPVFGFGGGRADVYEPEHVYWGTEEQWVDTGAETRINPDEGKALENPLAAIQMGLIYVNPEGPGGNPDPLQSARDMRETFGRMAMNDEETVALTAGGHAFGKAHGAKPADSFGGAPESENLALQGFGWLNDKEEIANGNITTSGIEGAWTPNPTQWGGDYFRLLFKYDYELVESPAGAKQWQPVNPDEEDMAPDARDASKKVPTMMTTADMALKMDPDYRKISERFRD…
A6F68_01152_ANY19670.1	ANY19670.1	CP016591.1	Altererythrobacter dongtanensis	typical catalase Group 6	MADTPRIPVTTTDAGIPVQSDEHSLTIGRDGPIVLNDHYLIEQMANFNRERIPERQPHAKGSGAFGHFEVTNDVSQYTKAKFLQPGAKTETAMRFSTVAGERGSPDTWRDPRGFSVKFYTEDGNFDMVGNNTPIFFIRDPLKFQHFIRSQKRRADNGLRDHDMQWDFWTLSPESAHQVTYLMGDRGIPKNWREMNGYGSHTYMLVNEAGEKFWVKWHFMTDQGTESGNAHLTQDEADRMAGIDGDYHRRDLFEHIAKGEYPSWTLKFQVMPFEDAKTYRINPFDLTKVWPHGDYPLIEVGKLTLTTNPIDWDTQIEQLAFEPNNMVPGIGLSPDKMLLARGFSYADAHRARLGVNYKQIPVNQAKNAEVHSYSRAGQGRTVNAVDPVYAPNSYGGPGAQ…
A6F68_01153_ANY19671.1	ANY19671.1	CP016591.1	Altererythrobacter dongtanensis	catalase-peroxidase Group 3	MDAKTGSIEGGCPMGHGDGGVRALLGRTNKDWWPEMLATEILNPNGPTNPYGDDYDYAEAFNTLDYNALKADLTALMTDSQPWWPADYGHYGPFFIRMAWHAAGTYRTADGRGGANSGQQRFAPLDSWPDNGNLDKARRLLWPIKQKYGKQISWADLFILAGNVAIESMGGPVFGFGGGRADVYEPERDIFWGSEDKWVNEGVQTRISPEHGMEVLEGPLAAIQMGLIYVNPEGPGGNPHDDAGMARDMRETFKRMAMNDEEIVALTAGGHTFGKAHGNGDPSTLGHAPAGGDLVAQGFGWVSGEEHGGIGEHTVTSGIEGAWTNTPDKWSENYFRLLLDYDYELVKSPAGANQWQPIDQKEEDMAPAAWDPSIKVPTMMTTADMALKRDPGFRKISEK…
A6J52_00880_ARB66622.1	ARB66622.1	CP020400.2	Moraxella catarrhalis	typical catalase Group 7	MSEMKCPYDHTHLTMSNGAPVIDNQNSMTAGARGPLLAQDLWLNEKLADFAREVIPERRMHAKGSGAFGTFTVTHDITQYTRAKIFSEVGKKTEMFARFTTVAGERGAADAERDIRGFALKFYTEEGNWDMVGNNTPVFFLRDPKKFPDLNKAVKRDPRTNMRSATNNWDFWTLLPEAFHQVTIVMSDRGIPKSYRHMHGFGSHTYSFINADNERFWVKFHFRTQQGIENLTDAEAEMVVGKDRESNQRDLFDAIERGDFPKWTMYVQIMPETDAQTVPYHPFDLTKVWPKGDYPLIEVGEFELNKNPENFFLDVEQSAFAPSNLVPGISVSPDRMLQARLFNYADAQRYRLGVNRNQIPVNAPRCPVYSNQRDGQGRVGDNYGGRPHYEPNSFGQWQD…
A6J67_10760_ARB84445.1	ARB84445.1	CP020409.2	Yersinia sp. FDAARGOS_228	typical catalase Group 7	MMSKKKGLTTAAGAPVVDNNNVVTAGRRGPMLLQDVWFLEKLAHFDREVIPERRMHAKGSGAYGTFTVTHDITRYTRAKIFAAIGKQTEMFVRFSTVAGERGAADAERDIRGFAMKYYTEEGNWDLVGNDTPVFYLRDPLKFPDLNHVVKRDPRTNLRNPTYKWDFFSQLPESLHQLTIDFSDRGLPKSYRHMHGFGSHTFSFINANNERFWVKFHFRCQQGIENLMDDEAEKLVGTDRESSQRDLYDAIERKDFPRWNLQIQVMPEHEASQTPYNPFDLTKVWPHGDYPLIDVGFFELNRNPENYFAEVEQAAFNPANVVPGVSFSPDRMLQGRLFSYGDAARYRLGVNHHQIPVNSAKCPFHNYHRDGAMRVDGNSGNGATYEPNSFGLFQEQPDFS…
A6K25_07335_ANB21106.1	ANB21106.1	CP015345.1	Alteromonas stellipolaris	typical catalase Group 4	MKRSFTRSIISCVTVGMLSMSLSAQADTLTRQNGAPVGDNQNSQTAGPWGPVLLQDSHLIEKLAAFDRERIPERVVHARGVGIHGYYENYEDLSDDTVAAPFQGEGKKTEVFVRFSSVVHGHLSPETLRDPRGFAVKFYTEQGNWDLVGNNFPVFFIRDAIKFPDMVHAFKPSPVTNKQDAKRVFDFFSHVPESTHTLTMLFSDYGTPASYLNMDGSGVHAFKFVDDEGNVKYVKFTWKANQPIKNFTAEEAMKQQGMDFQPHTTDVYTRIGEKGETASWDLYLQELEPEQLDDFDFNPLDTTKIWPEKLVSSRKIGRMVLNRVPDNFFEETEQAAFAPSNLIPGIEPSEDRMLQGRLFSYADTQRYRLGVNAYRIPVNAPKNVEINNHEQHGQLRTTS…
A6K25_07500_ANB21137.1	ANB21137.1	CP015345.1	Alteromonas stellipolaris	catalase-peroxidase Group 3	MSNAKLGDVNNSDRKCPVMHGGLTATGSTNMDWWPEALNLDILHQHDTKTNPMGDDFDYREAVKSLDFNELKKDMIALMTDSQSWWPADWGHYGGLMIRMSWHAAGSYRIADGRGGASTGNQRFAPLNSWPDNVNLDKARRLLWPIKKKYGNKLSWADLLVFAGTVAYESMGLKTYGFAFGRADIWHPEKDTYWGAEKEWLAPSDERYDDVETPETMENPLAAVQMGLIYVNPEGVNGKPDPLKTALHVRETFARMAMNDEETVALTAGGHTVGKCHGNGSADRLGPDPEGADIAEQGLGWMNHETRSIGRDTVSSGIEGAWTTNPTQWDNGYFELLLNYDWELKKSPAGAEQWEPIDIKEEDKPVDVEDPSKRYNPIMTDADMAMKMDPIYREISEKF…
A6K25_08000_ANB21221.1	ANB21221.1	CP015345.1	Alteromonas stellipolaris	catalase-peroxidase Group 2	MKITRVRKATLAGLISLALGTSHSFADNEISKPAGAKGTGMVQPFQARTNNFWWPEQLNLSQLRDHDSRSNPLGDDFDYAKAFSSLDLDQVKADVNELLTTSQDWWPADYGNYGPFFIRLSWHSAGTYRTLDGRGGGDGGQMRFDPLNSWPDNASLDKARRLLWPIKQKYGKALSWGDLMILAGTVGMENMGFDTYGYAGGRTDDWEPDMVYWGPEVEMLASDREEKGGELQRPLGATHMGLIYVNPEGPKGVPDPMGSAKNIRTAFNRMAMNDEETVALIAGGHTFGKMHGAHKPADCLEAEPGGAGLEEQGLGWKNNCGKGHSEDTVTSGLEGAWTQLPTRWTSLYLQNLLGFEWKQTRSPAGAIQWIPTDESAQTAVPDAHVEGKRHAPVMTTADL…
A6K25_12570_ANB22034.1	ANB22034.1	CP015345.1	Alteromonas stellipolaris	typical catalase Group 7	MAKKPQLTTSAGAPVVSNETTKTAGERGPALLQDYQLLEKLAHQNRERIPERVVHAKGWGAQGIFTVTHDITDYSCADIFSQVGKQTEVLSRWSTVAGESGAADTERDVRGFSLKFYTEQGNWDMVGNNTPVFFVRDGYKFPDFIRTQKRHPKTNLRSPEAMFDFWAGQPESVHQVTILMSDRGIPVSPMHMNGYGSHTFSMWNKDGKRHWVKFHFKTQQGIKNYTNETSEKIIGSTREKYQEELYNAIDEGNFPKWTMYIQAMPEEDAGKQAFNPFDLTKVWPHDDYPLIQVGELEMNKNPENYFQMVENAAFSPSNIVPGIGFSPDKMLQARIFSYADAHRYRLGTHYEALPANAPKNSKVNHYHKDGAMRFFTNDFGNPDAYYEPNQHEGPVADFS…
A7982_01404_APR76057.1	APR76057.1	CP016211.1	Minicystis rosea	typical catalase Group 6	MRGTGFASGRLIASRYHLHSDDVLDRNRERLHNPPRRGGPTEAPRRRRTSMSTKHASPTLTTEAGAPVPQNQHAQTAGPTGPVLLQDVHLLEKLARFNRERIPERVVHAVGAGAHGTFEVTNPEVSRYTRMKMFAERGKRTEVFVRFSTVAGSKGAADAARDPRGFAIKFYTEDGNWDLVGNNTPTFFLRDGIKFPDFIHSQKYDPYTNRQEPDNIWDFFSRSPEATHQFTWLFGDRGIPASLRHMDGFGSHTFQWVNARGERVWVKFHFKTNQGIENLTSEEAAVIAGRDPQHHLHDLYKAIERGDHPSWTLKVQIMTEAQAATYRFNPFDLTKVWSQKDFPLIEIGRLVLDRTPQNFFAATEQSAFDPGHFVPGIGPSPDRMLQARLFAYGDAARYR…
A7982_08168_APR82819.1	APR82819.1	CP016211.1	Minicystis rosea	catalase-peroxidase Group 4	MGQGFDYAKAFRSLDLAAVKKDLAALMTDSQDFWPADFGHYGPLFIRMAWHSAGTYRVGDGRGGGGRGQQRFAPLNSWPDNVGLDKARRLLWPIKQKYGHKISWADLLILTGNVALESMGFKTFGFAGGREDVWEPDQDVYWGIEKTWLGGDKRYSGERDLENPLAAVQMGLIYVNPEGPNGNPDPIAAAKDIRETFARMAMNDEETVALIAGGHTFGKTHGAAPASHVGADPEAGDLEAQGLGWTSTFGTGRGGDAITSGLEVTWTTTPTKWSTDFFKHLFGFEWELTKSPAGAHQWKPKGDAGAGTVPHAHDASKRIGPSMLTTDLSLRFDPAYEKIARRFMEHPEQFADAFARAWFKLTHRDMGPRARYLGPEIPAEELLWQDPIPKVDHPLIDDA…
A7982_11648_APR86299.1	APR86299.1	CP016211.1	Minicystis rosea	typical catalase Group 5	MSEKKAQPERDDEKSKDADLERNRVDTEQKGYLTTEQGVRVEDTDNSLKVGDRGPTLLEDFHLREKITHFDHERIPERVVHARGSGAHGYFQVYESLADLTRAKFLQDPSVKTPVFVRFSTVVGSRGSSDTPRDVRGFATKFYTEEGNYDLVGNNIPVFFIQDGIKFPDIIHSVKPEPDREIPQAASAHDTFWDFASLVPEITHMLMWVLSDRAIPRSYRMMEGFGVHTFRLVNAKGEAHFVKFHWKPLLGVHSLVWDEAQKIYGKDPDFNRRDLWDAIASGNYPEYELGLQIIEEKDEHAFAFDLLDPTKIVPEELVPVRRVGKMVLNRNPDNFFAETEQVAFCTQNVVSGIDFTDDPLLQVRNFSYLDTQLLRLGGPNFTELPINRAVAQVQNNNRD…
A7982_12378_APR87029.1	APR87029.1	CP016211.1	Minicystis rosea	typical catalase Group 1	MLWAFAGIVRCLPAAVSERVLASRTALPEVEPMKTSQKRSRGGASGAVKSAPKKGRARPTKERRKATEITETRAVDTSLAPAANAGRGVPTLGRTPQDPPLLHSQTVGQRGPVLEQDAVLHETLEAFVHEKLLERPVHVKGFGALGYFETTHSMKEHTKLAFVQNPGDRVPVAVRFSLAVSTKGTPDTSRNVRALSTKFYTADGIFDLLCNHIPVFLVRDGIRFPEAIHAFLPSPQTNLLDPSRLWRFVARAPEATHFILWLYSDLGTVKSLRHIRTYGVNTYVWRNAEGRRSYVKYHWRPLEGEQHIDRNEAVRLAGEAPDIAGQDLFDTIAAGKPVQFELNVQLMDPEDAGKLPFDPLDDTKVWDEDRHPLLPVGRLVLDRNPDDYTAQVEKIAFSP…
A7983_20805_AOR65657.1	AOR65657.1	CP015750.1	Pectobacterium wasabiae CFBP 3304	catalase-peroxidase Group 3	MDENKTKPTGKCPVMHGGNTSTGTSNTDWWPNALNLDILHQHDTKTNPLGGDFSYREALKTLDVDALKKDLHALMTDSQEWWPADWGHYGGLMIRMAWHSAGSYRTTDGRGGGGTGNQRFAPLNSWPDNVSLDKARRLLWPIKRKYGNKLSWADLIILAGNIAYESMGLKTFGFAFGREDIWHPEKDTYWGSEKEWLAKSTGRYGSDDRTSLENPLAAVQMGLIYVNPEGVDGKSDPLRTAQDMRVTFSRMAMNDEETVALTAGGHTVGKTHGNGDASLLGAAPESADVEEQGLGWHNPTGSGKGRHTVTSGLEGAWTTHPTKWDNGFFHMLLNHEWELRKSPAGASQWEPVSIKEEDKPVDVEDPSIRYNPMMTDADMALKVDPEYRKISERFSQDQA…
A7E75_02715_APG24057.1	APG24057.1	CP015518.1	Pelobacter acetylenicus	typical catalase Group 7	MAEDKSDKSKKLTTNAGAPVVDNNNIMTAGPRGPVLLQDTWFLEKMANFDREVIPERRMHAKGSGAYGVFTVTHDITSYTKAKIFSEVGKKTEMFVRFSTVAGERGAADAERDIRGFAMKYYTEEGNWDLVGNNTPVFFLKDPLKFPDLNHVVKRDPRTNLRSAKNNWDFWTLLPEALHQVTITMSDRGIPCSYRHMNGYGSHTYSLINAKNERFWVKFHFKTRQGIKCLTDCEAEAVIGKDRESNQRDLYESIEKGDFPGWKMQIQIMTDEQARTCPFNPFDLTKVWPHGDYPVMDVGEFELNRNPDNYFAEVEQAAFNPANIVPGIGYSPDKMLQGRLFSYGDAQRYRLGVNHHLIPVNRPRCPFHSYHRDGQMRVDGNYGSTLGYEPNGYGEWQEQ…
A7E78_11970_APG28494.1	APG28494.1	CP015519.1	Pelobacter sp. SFB93	catalase-peroxidase Group 3	MSEESKCPVTGKTAIPTAGGGTSNRDWWPNQLDLNILHQQSSLSNPMGENFNYAEEFKTLDLQAVKDDLYALMTDSQDWWPADYGHYGGLFIRMAWHSAGTYRMGDGRGGGGTGNQRFAPLNSWPDNVNLDKARRLLWPIKQKYGKKISWADLMILTGNCALESMGFKTFGFAGGRADIWEPEQDIYWGAEEEWLATSDKPKSRYSGDRDLENPLAAVQMGLIYVNPEGPDGNPDPVASGRDVRETFARMAMNDEETVALVAGGHTFGKCHGAGDAAQVGAEPEAAPIEEQGLGWKSSFGSGKGGDTISSGIEGAWKPNPTQWDMGYLKVLFKYEWELVKSPAGANQWLAIDVDEEDMIVDAHDPSKKLRPMMTTADLSLRFDPIYEPISRRYLENPEE…
A7K98_09045_ARU93907.1	ARU93907.1	CP015579.1	Tatumella citrea	typical catalase Group 6	MSNDNKPKITTTDAGIPVASDEHSLSVGPDGPLVLHDHYLIEQMANFNRERIAERQPHAKGSGAFGRFEVTEDVSQYTRAALFQPGVKTDVVMRFSTVAGERGSPDTWRDPRGFAVKFYTTEGNYDLVGNNTPVFFIRDPMKFQHFIRSQKRRADNNLRDNEMQWDFWTLSPESSHQVTWLMGDRGIPKSWRHMNGYSSHTYMWVNAAGEKFWVKYHFKTCQGVDFLTQQQADQLAGADGDFHVRDLFNAIKQGEFPQWTLYMQIMPFAEAENYRFNPFDLTKVWPHADYPLIKVGTLTLDRNPTDNHAQIEQAAFEPNNLVPGIGLSPDKMLLGRVFAYADAHRARLGVNYKQIPVNAPQSPVHSYSKDGAMRMTPVSDPVYAPNSKGGPQADGQNYP…
A7K98_11350_ARU94316.1	ARU94316.1	CP015579.1	Tatumella citrea	catalase-peroxidase Group 4	MSRSEDQNNNTFSAAEPESGAAKCPFPHGKTNKVAGGGTRNSDWWPAQLRVDLLNQHSSRSNPLGEDFDYRREFASLDYYALKADLRKLLTDSQSWWPADWGSYIGLFIRMAWHSAGTYRSVDGRGGSGRGQQRFAPLNSWPDNVSLDKARRLLWPVKQQYGQKISWADLYILAGNVALENSGFRTFGFAAGREDVWEADLDVNWGEEKTWLAHRHPETLAGSPLGATEMGLIYVNPEGPEHSGDPASAAPAIRATFGNMGMNDEEIVALIAGGHTLGKTHGAGPASHVGADPQAAPIESQGLGWASDYQSGAGADAITSGLEVIWTQTPTQWSHYFFENLFNYQWVQTRSPAGAIQFEAADAPASIPDPFHPEVKRKPTMLVTDLTLRFDPEFEKISR…
A8139_10070_AWY00309.1	AWY00309.1	CP016181.1	Marinomonas primoryensis	catalase-peroxidase Group 3	MSNEGKCPFNHGAADSSQSAGRGNSNKDWWPNQLNLNVLHQHSAKSNPMGEDFDYAEEFKSLDLNAIQQDLHTLMTDSQDWWPADYGHYGPFFIRMAWHSAGTYRTADGRGGATSGTQRFAPLNSWPDNVNLDKARRLLWPIKQNYGRKISWADLMILAGNCALESMGFKTFGFAGGRVDVWQPEEDIYWGTETKWLEESGGENSRYSGERDLENPLAAVQMGLIYVNPEGPDGKPDPLASARDIRDTFARMAMNDEETVALIAGGHTFGKAHGAGDAGQVGNDPEASGLTEQGFGWNNTQGTGNGVDTISSGLEGAWTKNPIKWDNGFFNNLFDYEWELTKSPAGAWQWAPKGTAGSNSVPDAHDATKRHAPMMFTSDLALRDDPIYAPISKRFHENP…
A8A54_09595_ANG96705.1	ANG96705.1	CP015775.1	Ochrobactrum pseudogrignonense	typical catalase Group 7	MADRPILTTSAGAPIPDNQNSLTAGERGPVLLQDYQLIEKLTHQNRERIPERVVHAKGWGAFGTLTITGDISKYTKAKALQPGAKTPMLARFSTVAGEQGAADAERDVRGFALKFYTEEGNWDLVGNNTPVFFVRDPLKFPDFIHTQKRHPKTNLRSSTAMWDFWSLSPESLHQVTILMSDRGLPTDVRHINGYGSHTYSFWNDAGERYWVKFHFKTLQGHKHWTNEEAEHVIGRTRESTQEDLFTSIDKGEFPKWKVQVQIMPELDADKTPYNPFDLTKVWPHADYPPIDIGVMELNRNAENYFTEIENAAFSPSNIVPGISYSPDKMLQARLFSYADAHRHRLGTHYENMPVNQPKCPVHHYHRDGQMNTFGGIATGNPDAYYEPNSFNGPVEQPSA…
A8A54_22520_ANG99313.1	ANG99313.1	CP015776.1	Ochrobactrum pseudogrignonense	typical catalase Group 5	MPARKSQPATATIHDQKLQRGAGGELHQTVEEGKARLTTAQGVPIADDQNSLKIGSRGPVLMEDFHFREKIFHFDHERIPERVVHARGYGAHGYFENYASLAAYTRADLFQRAGEKTPVFVRFSTVAGSKGSFDLARDVRGFAVKFYTQEGNWDLVGNNIPVFFIQDAIKFPDIIHAVKPEPDRGFPQAQSAHDNFWDFISLTPESMHMIMWVMSDRAIPRSFRFMEGFGVHTFRLVNARGESTFVKFIWKPKLGMQSVVWNEAVKINGADPDFHRRDLWDAISAGNFPEWELNLQLFDQQFADQFDFDVLDPTKIIPEEILAPIPVGRMVLDRMPDNFFAETEQVAFMTQNVPPGIDFSNDPLLQGRNFSYLDTQLKRLGSTNFTHLPINAPKCPFHH…
A8A57_08970_ANG92526.1	ANG92526.1	CP015774.2	Lelliottia amnigena	typical catalase Group 5	MSHNDKTHQSPIHGKEESEPGMDSLAPEDGSHRPTPEPTAPGEQPTAPGSLKAPDTGNEKLNALEPHRKGGEGFALTTNQGVRIADDQNSLRAGSRGPTLLEDFILREKITHFDHERIPERIVHARGSAAHGYFQPYKSLSDITKADFLSDPDKITPVFVRFSTVQGGVGSADTVRDIRGFATKFYTDEGIFDLVGNNTPVFFIQDAHKFPDFVHAVKPEPHWAIPQGQSAHDTFWDYVSLQPETLHNVMWAMSDRGIPRSYRTMEGFGIHTFRLINAEGKATFVRFHWKPVAGKASLVWDEAQKLTGRDPDFHRRELWESIEAGDFPEYELGFQLIPEEDEFKFDFDLLDPTKLIPEELVPVQLVGKMVLNRNPDNFFAENEQVAFHPGHIVPGLDFT…
A8A57_09080_ANG92548.1	ANG92548.1	CP015774.2	Lelliottia amnigena	Mn-catalase Group 03	MFKHVKQLQYTVRVAEPNPGLANLLLEQFGGPQGELAAACRYFTQGLGDDDPGRKDMLLDIATEELSHLEIIGTLVGMLNKGAKGELAEGTENEAELYRSMTANGNDSHITSLLYGGGPALTNSAGVPWTAAYIDTIGEPTADLRSNIAAEARAKIIYERLINVTDDPGVKDALAFLMTREAAHQMSFEKALQSIRNNFPPGKLPPVEEYTNKYYNMSQGGEVRGSWNSDKHFEYVEDPQPAVDGGDGLADVKLSSTQKTLLKAMAKRTESDPATDSLTGAELGMGKKKV
A8A57_21020_ANG94752.1	ANG94752.1	CP015774.2	Lelliottia amnigena	catalase-peroxidase Group 4	MSTSDDTNKAASIGKCPFHQGGVDHSAGAGTGSRDWWPKQLRIDLLNQHSNRSNPLGEDFDYRKEFSKLDYSALKGDLKALLTDSQPWWPADWGSYAGLFIRMAWHGAGTYRSVDGRGGAGRGQQRFAPLNSWPDNVSLDKARRLLWPIKQKYGQKISWADLFILAGNVALENSGFRTFGFGAGREDVWEPDLDVNWGDETAWLKHRDPEALAKNPLAATEMGLIYVNPEGPNASGEPLSAAAAIRATFGNMGMNDEETVALIAGGHTLGKTHGAGEATHVGTDPEASPIEAQGLGWTSTHGSGIGADAITSGLEVIWSQTPTQWSNYFFENLFKYEWVQTRSPAGAIQFEAVDAPEIMPDPFDPSKKRKPTMLVTDLTLRFDPEFEKISRRFLNDPQA…
A8C56_07760_ANH83780.1	ANH83780.1	CP015772.1	Niabella ginsenosidivorans	typical catalase Group 5	MAKRSSKKDLKTADLQSYTTDAANQFMTTDQGLKMNDDHNSLKAGDRGGTLLEDIILREKITHFDHERIPERIVHARGSGAHGVFRLTKSLKQYTKAAFLTDTTQETPVFVRFSTVAGSRGSTDLARDVRGFAVKFYTTEGNYDLVGNNIPVFFIQDAMKFPDLVHAVKPEPDNEIPQAASAHDTFWDFISLMPESTHMILWVMSDRAIPRSLRMMEGFGVHTFRLINEKGAACFVKFHWKPVLGVHSVAWDEAQKISGKDSDFHRRDLWEAIEEGRFPEWDLGVQIIPEKEEHRFEFDLLDPTKLVPEELVPVQIIGRMTLNRNPDNFFAETEQVMFSPAHLVPGIDFSNDPLLQGRLFSYTDTQLSRLGGPNFHQIPVNRSVNTIYNNQRDGHMQMQ…
A8C56_18890_ANH82770.1	ANH82770.1	CP015772.1	Niabella ginsenosidivorans	catalase-peroxidase Group 4	MEKDSKDISKCPFHNGSIKPNVAGGGTQIHDWWPHRLNLNILRQHSSLSDPMDKNFNYAEAFKSLDLEAVKKDLHALMTDSQDWWPADFGHYGPLFIRMAWHSAGTYRVGDGRGGAGSGQQRFAPLNSWPDNVSLDKARRLLWPIKQKYGNKISWADLLILTGNVALESMGFKTFGFAGGREDAWEPSEDVYWGSETTWLGGDIRYARGSEGVKEHHGVLVSDDDADGQIHSRDLEKPLAAVQMGLIYVNPEGPDGNPDPVAAAKDIRDTFGRMAMSDEETVALIAGGHSFGKTHGAAPATHVGKEPEAAGIEEQGLGWKNSFGTGRGADTITSGLEVTWTKTPTQWSNNFFENLFGFEWELSKSPAGAHQWVAKDADSIIPDAFDASKRRLPTMLTTD…
A8C75_16130_ANG63852.1	ANG63852.1	CP015839.1	Marinobacterium aestuarii	catalase-peroxidase Group 3	MSANNNDSGAAGKCPVMHGSRTSLGDKGTANLHWWPNQLNLRILHQNTSEMSPMDEDFSYADAFRKLDLQAVKSDLQALMTDSQDWWPADYGHYGPFFIRMAWHSAGTYRIGDGRGGAGSGSQRFAPLNSWPDNGNLDKARRLLWPIKQKYGNKLSWADLMILAGNVALESMGFKTFGFGGGRVDIWEPEEDIYWGAETEWLATSDKANSRYAGDRELETPLAAVQMGLIYVNPEGPDGNPDPLASARDIRETFARMAMNDYETVALTAGGHTFGKTHGAGDPEVHVGAEPEAAPMEEMGLGWKNSLGTGKGEYAITSGLEGAWTSTPTQWDMSYFDTLFGYEWELTKSPAGAQQWTPRDEAAKDTVPDAHNPSRRHAPMMSTADMAMREDPEYRKIAQ…
A9404_03575_ANJ66582.1	ANJ66582.1	CP016027.1	Halothiobacillus sp. LS2	catalase-peroxidase Group 3	MSESKCPFHHTAGGGTSNQDWWPNRLNLDILRQHSSKSDPMGTDFDYAAAFKSLDLAAVKKDLRELMTDSQDWWPADYGHYGPFFIRMAWHSAGTYRTGDGRGGAGHGNQRFAPLNSWPDNVNLDKARRLLWPIKQKYGRKISWADLIVLTGNVALESMGFKTFGFAGGREDIWEPEKDVYWGNEDEWLATSDTPKSRYSGERDLEDPLAAVQMGLIYVNPEGPDGKPDPIASGRDVRETFARMAMNDYETVALTAGGHTFGKCHGAGDAALVGPEPEAAPIAQQGLGWLSSYKSGKGGDQIGSGLEGAWTPTPTQWDMTYLEMLFDNEWELTKSPAGAWQWTPKETTDGNQAPAAEDPSQKRPIIMTTADMSMRMDPIYGPIAQHFRENPEEFADAFA…
A9798_12310_AOV97654.1	AOV97654.1	CP016043.1	Edwardsiella hoshinae	catalase-peroxidase Group 3	MGNKNEFSGGKCPVMHGGMTSSSMSNKDWWPNALNLDILHQHDSKTNPMGKDFNYREELKKLDVAALKNDVRALMTESQPWWPADWGHYGGLMVRMAWHSAGSYRIADGRGGAGTGNQRFAPLNSWPDNVNLDKARRLLWPIKKKYGNKISWADLIILAGTMAYESMGLKTFGFAFGREDIWHPEIDTYWGSEKEWLAPSGSEGSRYSGERDLENPLAAVMMGLIYVNPEGVDGHPDPQKTANDVRVTFARMAMNDEETVALTAGGHTVGKCHGNGSAANLGPAPEGADLQEQGLGWMNHTSRGIGRDTVSSGIEGAWTTNPTQWDNGYFDMLFGHEWTLTKSPAGAWQWVPIDIKEEDMPLDVEDPSRRTLPIMTDADMAMKVDPAYRQIAERFRRDP…
A9D12_06785_ANK12698.1	ANK12698.1	CP016033.1	Porphyrobacter neustonensis	catalase-peroxidase Group 3	MDAKTGDISGGCPFNGSVDMRNLLGRTNRDWWPQALQVDILTEGGRSANPYGEDFDYAEAFNALDYNALKADLTALMTDSQPWWPADYGHYGPFFIRMAWHAAGTYRTGDGRGGSNSGQQRFAPLNSWPDNGNLDKARRLLWPIKQKYGKNISWADLFILTGNVAIESMGGPVFGFGGGRADVFEPESVYWGTEEQWVNEGVATRIQPKEGKALENPLAAIQMGLIYVNPEGPGGNPHDPEGMARDMRETFARMAMNDEETVALTAGGHAFGKAHGAHPADTFGGAPESEDLHLMGFGWLNDADEIASGNITTSGIEGAWTPNPTQWGGDYFRLLFKYDFELVKSPAGAHQWQPINPDPEDMAPDARDPSKKVPTMMTTADMALKWDPEYRKISERFLH…
A9D12_08210_ANK14209.1	ANK14209.1	CP016033.1	Porphyrobacter neustonensis	typical catalase Group 5	MRDHQQGQGSAAFTDNTGNAGELHQDIAADGDHSDGPAHLTDNHGHRIADNQNSLRAGTRGPTLLEDFVLREKIFHFDHERIPERIVHARGSGAHGTFEVTRAIPEWTRAGLFQEVGTTCPVFVRFSTVAGGAGSVDTPRDVRGFAVKLYTQEGNWDLVGNNIPVFFIQDAIKFPDLVHSVKMEADRGYPQAASAHDTFWDFVSLMPETMHMVMWAMSDRGIPRSLRMIEGFGVHTFRFINAEGEGRFVKFHWKPVLGLQSTTWDEAVKIAGADPDFHRRDLWEAIDAGDFPQWDLGVQIFDEAWAAKQPYDVLDATKLIPEEEIPVEVIGRMTLNRNVDNFFAETEQVAFLPTNILPGIDFSNDPLLQGRLFSYLDTQKSRLGTTNFHQIPINAPKCP…
A9D14_03960_ARU15483.1	ARU15483.1	CP019602.1	Croceicoccus marinus	catalase-peroxidase Group 3	MDAKTTDPLKGGCPVQHQARKSLTGRTNRDWWPNHLSLDILHQGYTNPSPFDPDFDYAEAFNALDYDAVKRDLHALMTDSQPWWPADYGHYGPFFIRMAWHSAGTYRIQDGRGGAGSGQQRFAPLNSWPDNANLDKARRLLWPIKQKYGKNLSWADLMIMAGNVAFESMGAPVFGFGGGRADTFEPETDVYWGTEEYWVGHENNETRIQPDKELDLEDPLAAIQMGLIYVNPEGPGGDPDPMGSARDIRKTFGNMGMNDVETAALTVGGHTFGKCHGAGDASLVGAEPEGADIAMQGLGWTSGHESGVGDHTITSGLEGAWTPTPTQWDMSYFDMLLDHEYELVRSPAGAKQWTPVGAPPETLAPQAHDPSKKQPTIMTTADMAMKVDPEYRRIMEKFR…
A9D14_10010_ARU16452.1	ARU16452.1	CP019602.1	Croceicoccus marinus	typical catalase Group 5	MANDIDFDDGGANHQKPKGSDDIMTTAQGAPVADDQNWLTAGPRGPQLLEDHIAREKIFHFDHERIPERVVHARGYGIHGHFELKKAIPEYSHAAIFNEVGVKTPTFTRFSTVAGNKGSPDLARDVRGFATKFYTKQGNWDLVGNNIPVFFIQDAIKFPDLIHAAKPAPDRGFPQAQTAHDNFWDFISLTPESMHMVMWIMSDRTIPRSFRFMEGFGVHTFRLINKEGQSHFVKFHWKPHLGMQSVIWNEAVKVNGADPDFHRRDMWDSIEAGDFPAWDLGIQVFDEDFAESFEFDVLDATKIIPEEQVPVQIIGTLTLDANVDNFFAETEQVAFCTQNIVPGMDFSNDPLLQGRNFSYLDTQLKRLGGPNFTHIPINAPKCPVRHFQQDGHMAMTNPK…
A9P82_08615_ANI89350.1	ANI89350.1	CP015971.1	Arachidicoccus sp. BS20	catalase-peroxidase Group 4	MEANSGDISKCPFHNGTLKKENISTAGTQNKDWWPKQLTLDILRQHSSLTDPYGEEYNYAEEFKKLDYDALKQDLTDLMTDSQDWWPADFGHYGGFMIRMAWHSAGTYRVQDGRGGGGRGQQRFAPLNSWPDNVSLDKARRLLLPIKLKYGKKISWADLIILAGNVALESMGFKTSGFGGGRTDVWEADKDVYWGDEKAWVAQHRNPETLENPLAATEMGLIYVNPEGPDRNHDPLSAAVAIRKTFGNMGMNDEETVALIAGGHTFGKTHGAADPNKYVEAEPEAAPIEQQGFGWKNSYGTGTGSEAITSGIEVTWTTTPVQWSHDFFKHLFEFEWELSQSPAGAYQWVAKQAGEIVPDAFDSSKKHFPTMLTTDLSLKFDPVYEKISRRFYEHPDEFA…
A9R04_00090_APC33210.1	APC33210.1	CP017965.1	Nocardiopsis dassonvillei	typical catalase Group 3	MTDVSSQGSAPGDDREVLTNRQGHPVYDNQNQRTVGERGPATLENYQFLEKISHFDRERIPERVVHARGVTAFGYFESYGAWGDEPISRYTRAKLFQGRGKRTDIALRFSTVIGGRDSSECARDPRGFAIKFYTEDGNWDLVGNNLAVFFIRDAIKFPDVIHALKPDPVTFRQEPNRIFDFMSQTPECMHMLVNLFSPRGIPADYRHQQGFGVNTYKWVNDVGETVLVKYTWMPKQGVRSMTEADAANLQADETGHATKDLHEAIDRGDYPEWELLVQMMSDEEHPELDFDPLDDTKTWPEQDFPPKAVGRIVLDRNVSDNFAENEQISFGTGVLVDGLDFSDDKMLVGRTFSYSDTQRYRVGPNYLQLPVNQAKNADVRTNQRDGLMAYHQDSGGENP…
A9R04_12725_APC35500.1	APC35500.1	CP017965.1	Nocardiopsis dassonvillei	Mn-catalase Group 10	MFRHTKHLQFEAKPEAPDALYAAKLQELIGGAYGEMTVTMQYLFQGWNCRVEGKYKDLIMDVATEEIGHVEMLATMVARLLEGAPATTVAKAVKDPAVAAVVGGMNPQQAIVAGGGAVPADSGGTPWNGKYIVASGNLLADFRANAAAEAQGRLQTARLYNMTDDPGVKAMLQFNLARDTVHQNMWLAAIEELQEDGMEGEIAPNALFDEENQEHANTIWGLSDGTAAANGGWSHRPAPDGRHELRYLDQPQPLGGPASAPPPDPALYGTDGGPSGEGSVKGPSKATKGEGFVDKLKDTLE
A9R04_16915_APC36265.1	APC36265.1	CP017965.1	Nocardiopsis dassonvillei	typical catalase Group 7	MSQDNTKPLTTANGAPVANNQNSLTAGPRGPMLLQDLWFLEKLAHFDREVIPERRMHAKGSGAFGTFTVTQDITRYSKAAIFSEVGKQTEMFARFSTVAGERGAADAERDIRGFALRFYTEEGNWDVVGNNTPVFFFRDPLKFPDLNRAVKRDPRTNMRSAENNWDFWTNLPEALHQVTIVMSDRGIPDGYRHMHGFGSHTFSFINEAGERFWAKFHFRTQQGIKNLTDQEAAQVVAGDRESAQRDLFEAIERGDNPKWTFYVQIMPEAEAADYRFHPFDLTKVWSKKDYPLIEVGEFELNRNPENYFADVEQAAFTPANLVPGISFSPDRMLQGRLFSYGDAARYRLGVNHHQIPVNYPRGAKLVNTYHRDGTMRVDGNQGGVPGIEPNSYGRWQEQP…
A9R04_26260_APC37959.1	APC37959.1	CP017965.1	Nocardiopsis dassonvillei	typical catalase Group 5	MSTEGRGGSEGRDAKDRQLDAVRTDSDQPLTTETGVRVGDTDNSLRAGARGPTLLEDFHAREKITHFDHERIPERVVHARGAGAYGHFRPYEGLSELTAAHFLSGPDVTTPVFVRFSTVAGSRGSADTVRDVRGFAVKFYTEEGNYDLVGNNMPVFFIQDGVKFPDFVHAVKPEPHNEIPQAQSAHDTLWDFVGLQPETTHMMMWLMSDRAIPRSYRTMQGFGVHTFRFVSAEGRGTFVKFHWRPLLGTHSLVWDEAQRVQGKDPDFNRRDLWEAIERGQYPEWELGVQLVPEEDEHAFDFDLLDATKIIPEEQVPVRPIGKLTLNRNPDNFFAETEQVAFHTANVVPGIDFTNDPLLQARNFSYLDTQLLRLGGSNFQQIPINRPVAPVSNNQRDGFA…
A9Y76_06185_ANJ72075.1	ANJ72075.1	CP016022.1	Ralstonia insidiosa	typical catalase Group 7	MSKDILTTAAGAPVVDNQNSMTAGPRGPMLLEDVWFLEKLAHFDREVIPERRVHAKGSGAFGTFTVTHDITQYTKASIFAEVGKQTPLFLRFSTVAGERGAADAERDPRGFAIKFYTDEGNWDLVGNNTPVFFLRDPLKFPDFIHTQKRDPRTNLRSAVAAWDFFSKNPETLHQVTIVMSDRGIPKTLRHMDGFGSHTFSLINAAGERFWVKFHFKTQQGIQNYTNEEAAQVVAQDRESSQRDLVESIDRGDFPRWNLKVQIMPEADAATYHINPFDLTKVWPHKDYPLIDVGVLELNRNPDNYFAEVEQAAFTPANVVPGIGFSPDKMLQGRLFSYGDTQRYRLGVNHHQIPVNAPKCPFHNSFHRDGAMRTDGNLGSKLNYEPNREGAFAQDRRGEE…
A9Y76_14275_ANJ73562.1	ANJ73562.1	CP016022.1	Ralstonia insidiosa	catalase-peroxidase Group 4	MTTEAKCPFSSQALAASQADGGGTTNKDWWPNQLRVDLLAQHSEKSDPLGTNFNYREAFKKVDYDALKADLRKLMTDSQDWWPADFGHYGPQFIRMAWHAAGTYRTGDGRGGAGRGQQRFAPLNSWPDNVNIDKSRRLLWPIKQKYGQAISWADLLILTGNVALETMGFRTFGFAGGREDTWEPDNDVYWGAEKTWLAPTNNPHSRYSGERDLDNPLAAVQMGLIYVNPEGPDGNGDPISAARDIRETFARMAMDDEETVALIAGGHTFGKTHGAGPASNVGPDVEAAPLEAQGLGWASTYQSGKGKDAITSGLEVTWTQTPAQWSNFFFENLFKYEWVQEKSPAGALQWVAKDAEAIIPGPTPDSPKRKPTMLTTDLSLRFDPAYEKISRRFLDNPQA…
AA2016_4410_AMS43322.1	AMS43322.1	CP015005.1	Aminobacter aminovorans	typical catalase Group 5	MAKSTNRTSGKLATIHDQKLRRGEGGELHQLAEGATPVLTTAQGGPVSDDQNSLKIGARGPTALEDFHLREKIFHFDHERIPERVVHARGYGAHGYFETYKSLAKYTRADIFQRAGEKTPAFVRFSTVAGSKGSVDLARDVRGFAVKLYTQEGNWDIVGNNIPVFFIQDAIKFPDIIHAVKPEPDSGFPQAQSAHDNFWDFISLTPESMHMIMWVMSDRAIPRSFRFMEGFGVHTFRMVNAKDESTFVKFHWKPKLGLQSVVWNEAVKINGADPDFHRRDLWDAIKAGNFPEWELQVQLFDQEFADSFDFDVLDATKLIPEELLPPVPVGRLVLDRMPDNFFAETEQVAFMTQNVPPGIDFSNDPLLQGRNFSYLDTQIKRLGSTNFTHIPINAPKCPF…
AA2016_5136_AMS44043.1	AMS44043.1	CP015005.1	Aminobacter aminovorans	catalase-peroxidase Group 4	MDTKTETSAGKCPVAHKPTGTGNRDWWPNMLDLSVLHQHSALSDPMGEAFDYAKEFESLDLDAVIKDLTALMTDSQDWWPADFGHYGPLFIRMAWHSAGTYRIGDGRGGAGAGQQRFAPLNSWPDNVNLDKARRLLWPIKQKYGRKISWADLMILTGNVALETMGFKTFGFAGGRADVWEPEQDIYWGKEGKWLADERYSGDRELEGPLAAVQMGLIYVNPEGPNGNPDPLAAARDIRDTFARMAMNDEETVALIAGGHTFGKTHGAGDAANVGVEPEAADLELQGLGWHNSFGTGKGGDAIGSGLEVTWTTTPTKWTNNFFWNLFGYEWELTKSPAGAHQWTPKHNMGAGTVPDAHDKSKRHAPAMLTTDLALRFDPEYEKISRRFLENPDQFADAFA…
AA2016_6335_AMS45231.1	AMS45231.1	CP015007.1	Aminobacter aminovorans	typical catalase Group 5	MLTTAQGGPVSDDQNSLKIGARGPTALEDFHFREKIFHFDHERIPERVVHARGYGAHGYFETYESLAAYTRADLFQRAGEKTPAFVRFSTVAGSKGSFDLARDVRGFAVKLYTKEGNWDLVGNNIPVFFIQDAIKFPDIIHSVKPEPDRGFPQAQSAHDTFWDFISLTPESMHMIMWVMSDRAIPRSFRFMEGFGVHTFRFVNAKDESTFVKFHWKPKLGLQSVAWNEAVKINGADPDFHRRDLWQAIQSGNFPEWEMRVQLFDQDFADSFDFDVLDPTKIIPEEILEPIAVGRLVLDRMPDNFFAETEQVAFMTQNVPPGIDFSNDPLLQGRNFSYLDTQLKRLGSTNFTHLPINAPKCPFHHFQQDGHMAMRNPVGRVNYQPNSFGEGPRESPQQGF…
AA314_05114_AKJ03488.1	AKJ03488.1	CP011509.1	Archangium gephyra	typical catalase Group 5	MDKKTPETVSINERSKDLELERNRSDPAGQRMTTGQGVPVEDTDNSLKVGARGPTLLEDFHLREKIMRFDHERIPERVVHARGSAAHGYFQVYESLAEYTKAKVFQDPSKKTPVFVRFSTVAGSRGSADTVRDVRGFAVKFYTEEGNWDLVGNNIPVFFIQDGIKFPDIVHAAKPEPHHEMPQASTAHDSFWDFISLMPESAHMIMWVMSDRAIPRSYRMMEGFGVHTFRLVNAKGVSRFVKFHWKPLLGVHSLVWDEAQKLAGKDPDFHRRDLWEAIEKGNFPEYELGLQIIDEKDADKLGIDLLDSTKIIPEEVVPVRRVGKLVLNRNPTNFFAETEQVAFCTSHVVPGIDFTDDPLLQARNFSYLDTQLTRLGGPNFTEIPINRPIAPVHNFHQDG…
AA314_08222_AKJ06596.1	AKJ06596.1	CP011509.1	Archangium gephyra	typical catalase Group 6	MSNRPRLTTEAGAPVADNQHSQTAGATGPVLLQDHHLLEKLARFNRERIPERVVHAVGSGAYGYFEVTNPDISRYTLMKLFDTKGKRTEVFLRFSTVAGSKGAPDTARDPRGFAVRFYTEDGNWDVVGNNTPVFFLRDGIKFPDFIHSQKYDPFTNCQEPDNQWDFFSYSPEATHQFTWLFGDRGIPATLRHTDGFGSHTFQWVNAKGERFWVKFHFKTDQGIRTLSSEEAAAIGGKDPQYHQRDLYTALARGEYPSWTLKVQVMPEADAPTYRFNPFDLTKVWPYKDYPLIEVGKLVLNRAPDNYFADVEQAALDPSNFVPGIGPSPDRMLQARLFAYGDAHRYRLGINHTRLPVNSPRGVQGGARNYGRDGAMAFDGNGGRSKNYEPNSYNGPAQTG…
AA637_07415_AUC60993.1	AUC60993.1	CP024912.1	Cyanobacterium stanieri HL-69	catalase-peroxidase Group 3	MTTNSGKCPVMHGAVTTNSMSKMEWWPKALNLDILSQHDRKTNPMGADFNYQEELKKLDVTALKEDLHALMKDSQDWWPSDWGHYGGLMIRLSWHAAGTYRIADGRGGASTGNQRFAPLNSWPDNVNLDKARRLLWPIKKKYGNHLSWADLITYAGTIAYESMGLKTFGFAFGREDIWHPEKDIYWGSEKEWLATSDNPQSRYSGERNLENPLAAVMMGLIYVNPEGVDGNPDPLKTAHDVRVTFLRMAMNDEETVALTAGGHTVGKCHGNGTEELLGAKPEGAELEDQGLGWMNKTQRGIGRDTMSSGIEGAWTTHPTQWDNGYFQMLLNYDWELKKSPAGAWQWEPINIKEEDKPVDVEDPSIRLNPIMTDADMAMKMDPKYRKISERFYNDPEYFA…
AARI_02500_CBT74486.1	CBT74486.1	FQ311875.1	Glutamicibacter arilaitensis Re117	catalase-peroxidase Group 4	MSETTAGQCPVVGQGRIHPTQGNANTEWWPNKLNLKILAKNQQVSNPLDEDFDYIEAFNALDMEALKADLIENMTTRQDWWPADFNHYGPLYIRMAWHSAGTYRSHDGRGGGGAGQQRFAPLNAWPDNVGLDKARRLLWPVKKKYGQSISWADLMILAGNVAMEHMGLKTFGFAGGRKDVWEADDDVYWGPEKVWLDNERYSGERDLEAPLAAVQMGLIYVNPEGPDGNPDPLASAIDVRETFRRMGMDDYETVALIAGGHTFGKTHGANNVDRIGADPEAAPLEEQGLGWKNGYGEGNAENNTASGLEVTWTYHPTRWDNEFFHILFAYEWELFESAAGAKQWRPVNGGGAGLVQPAHDTLEHREPRMLTSDLALRFDPIYGPISKNFKENPDEFAEA…
AARI_07180_CBT74938.1	CBT74938.1	FQ311875.1	Glutamicibacter arilaitensis Re117	typical catalase Group 6	MASNEPRSTTQAGIPAVSDRNSLTVGANGPIVLHDHHLAETLQHFNRMNVPERRPHAKGSGAFGEFETTEDISRYTKAALFQPGVKTETLMRFSTVAGELGSPDTWRDVRGFSMKFYTTEGNFDLVGNNTPVFFLRDPMKFPHFIRSQKRLPDSGLRDGTMQWDFWTQNPESAHQVTYIMGQRGLPKTWREMNGYGSHTYMWVNAAGEKFWVKYHFLNQQSDKFETMSGDQAQALAGSDAEFHRRDLFDAIKAGNFPKWDLYVQIMPYEEAKTYRYNPFDLTKVWSKKDYPRIKVGTLTLNRNPENFFAQIEQAAFSPGNMVPGMGMSPDKMLLGRNFAYADAQRYRIGTNFQQLPVNKPKCPVHSYNFEGNMTFDHTGDRCVYAPNSFEDSWSDETGP…
AARI_14710_CBT75690.1	CBT75690.1	FQ311875.1	Glutamicibacter arilaitensis Re117	typical catalase Group 5	MASEPEQQASPGGEPVLSGPGQDSEFLTTNQGAPVSDTDHSLKAGERGPTLLQDHHLREKIMHFDHERIPERVVHARGAGAHGSFISYGNASELCRADFLKPGKQTRVFVRFSTVVGSRGSMDTARDTRGFATKFYTEEGIFDLVGNNIPEFFIQDGIKFPDLVHAAKPHPDVEIPQAQSAHDTFWDFVSLHTPAQAHVMWQMSDRAIPRSLRMMEGFGVHTFRMVNEAGKASLVKFHWKPKLGVHSLAWEESQLAAGADPDFHRRDLAEAIDAGAYPEWELGVQIFPDDGTAVFEGIDLLDPTKFVPEELAPVQPLGKMVLDRNPENYFAQTEQVAFHPGHLVPGIDISDDPLLQARLFSYLDTQLTRLGGPNFAQIPINAPVSPVNDMFRDGFHQHR…
AAT16_11510_AKG74758.1	AKG74758.1	CP011366.1	Salinicoccus halodurans	typical catalase Group 7	MDKENQSQHAGDVRAGGGSQAREQSQNQNSDRLTTLFGNPVGDRENTMTAGPRGPIVMQDPYFLDMMAHFDREVIPERRMHAKGSGAFGTFTVTHDITQYTKAKIFSEIGKQTEMFARFSTVAGERGAADAERDIRGFALKFYTEEGNWDLVGNNTPVFFFRDPKLFPSLNHVVKRDPKTNMHNAQSNWDFWTSLPEALHQVTIIMTDRGIPKGFRNMHGFGSHTYSMINEDNERVWVKFHFRTQQGIENYTGAEAEEIIAKDRESSQRDLFDNIEEGNFPKWKLYIQVMTEEQARNHKDNPFDLTKVWFKDEYPLIPVGEFELNRNPENYFAEVEQAAFAPTNIVPGLGFSPDKMLQGRLFSYGDTQRYRLGVNHHQIPVNSPKGAANVCPFSRDGAM…
AAT16_12015_AKG74852.1	AKG74852.1	CP011366.1	Salinicoccus halodurans	typical catalase Group 5	MSKKKDELNQRDTIDNTEKAALRTNQGLPVSEDEFSLKAGERGPTLMEDFHFREKMTHFDHERIPERVVHARGFGVHGEFEIYESLEKYTKADFLTDPGKKTPVFVRFSTVAGNRGSMDIPRDVRGFATKFYTDEGNYDLVANNMPVFFMQDAIKFPDFVHAVKPEPHNEMPQAASAHNTFWDWVSVNTESAHMVMWLMSDRAIPRSFSMMEGFGVHTFRLVNAEGKSHFVKFHWKPKDGMHQVMWDEAQMINGKNIDFNRQTLWENIEKGNPAVFELGLQVIDEEDEFNMDFDILDPTKLWPEEDVPVQIVGKMTLNQNVDNFFAETEQVAFHPGSVVPGIDFTNDPLLQGRLFSYTDTQLIRLGGPNFHQLPINRPVCPFANNQRDGYNQMYIHKGE…
AAT17_00895_ALM19912.1	ALM19912.1	CP011373.1	Nonlabens sp. MIC269	catalase-peroxidase Group 3	MSSNKPHGEAFDINDSDASKCPFLSGNQSQTAGHGTKNRDWWPNELKLNILRQHDPKHNPLGEDFNYAEAFASIDYDQLKKDLTQLMTDSQDWWPADYGHYGGLMIRMAWHSAGTYRVGDGRGGASTGNQRFAPINSWPDNGNLDKARLLLWPIKQKYGSLLSWADLMILAGNVALESMGFPTFGYAGGREDIYEPEQDVYWGSETEWGENAARYDGEKDPLKRDLEDPLAAVMMGWIYVDPEGPDGNPDPIGSAKDVRETFGRMAMNDEETVALVAGGHTFGKAHGAADPGQFVGVEPHGASMAEMSTGWKNTFQSGVLDDVITSGIEGAWTPNPTQWDADYFDVLLNYDWELTKSPAGAHQWTPTKESQARMAPTAGGKGKQALMMTTADIALKEDP…
AAT17_11225_ALM21764.1	ALM21764.1	CP011373.1	Nonlabens sp. MIC269	catalase-peroxidase Group 4	MRKILIISAIALVAIASVAFTMHINSYSDKTSTSESGGCPFGFDQPKSTGNRIKGEGKTNQEWWPNSLDLSVLRQNSDKSNPLGEDFDYKKEFESLDYAALKADVEKALTDSKDWWPADFGNYGGLFIRMAWHSAGTYRTGDGRGGTREGKQRFAPQNSWPDNANLDKARRLLWPVKQKYGQKISWADLMILAGNVSFESMGFETLGFAAGREDTWEPQTSVYWGSENEMLGDDRFNEERELEQPLAAAQMGLIYVNPEGPNGNPDPVLAAHDIRKTFGRMGMNDEETVALIAGGHTLGKTHGAASGENLGNAPEESGIEEQGLGWSSTFKSGKGADAVTSGLEVTWTLTPTQWSNGYFKSLFENEWKLVKSPGGAHQYEAVNPKKMYPHAFDKDKEVK…
AAV35_009035_AKG04931.1	AKG04931.1	CP011361.3	Salimicrobium jeotgali	typical catalase Group 5	MIRRIRVSDKKSRKQEQLERFTADDRDKEMTTNHGTKLSEDEFSLKAGERGPTLMEDFHFREKITHFDHERIPERAVHARGYSAHGEFELYESLEQYTTADFLTDTSKKTPTFTRFSTVAGSKGSAELARDVRGFATKFYTEEGNFDLVGNNIPVFFIQDAIKFPDLVHALKPEPHNGIPQAASAHDTFWDFIANNQESAHMILWAMSPRSIPRSFRMMEGFGVNTFRLVNKEGKGHLVKFHWKPKLGVHSLVWDEAQKVNGKNPDFHRADLYEAIENGDFVEFELGLQIIDEGDEHSFDFDVLDPTKVWPEEEVPVKRVGKLTLNRNVDNVFAENEQVAFHPGHVVPGIDFSNDPLLQGRLFSYTDTQLTRLGGPNFHEIPINRPVCPFHNNQRDGMH…
AAV35_012065_AKG05428.1	AKG05428.1	CP011361.3	Salimicrobium jeotgali	typical catalase Group 6	MTDKNNRLTTSSGAPVGDNQNSLTAGRRGPGLIQDVHLLEKLAHFDRERIPERVVHAKGAGAYGTFEVTNDEISNYTKADFLSEKGKATDMFIRFSTVAGESGSADTVRDPRGFAIKFYTEEGNYDLVGNNTPIFFIRDAIKFPDFIHTQKRNPQTNLKDKNMVWDFWSHSPESLHQVTYLHGDRGIPATFRHMNGYGSHTYKWVNAEGEPFWVKYHFVSDQGVKGLDASVADEIAGTNPDYHTEDLFNAIDKGDFPSWTLYVQIMPFEDAKSYKWDPFDVTKIWSLKDYPRIEVGKMTLNRNPRNYFAEVEQVALSPAHFVPGIEASPDKMLQGRLFSYSDTQRYRLGVNHEQIPVNRPKNEQYNYQRDGYMRVDGNGGSNYNYEPNSYDHLPKEDDT…
AAW31_06685_AKH37573.1	AKH37573.1	CP011451.1	Nitrosomonas communis	typical catalase Group 5	MSDESDQKAARGKGGEVHQQAAGEIKVLTTQQGSPIADDQNSLKAGARGPTLLEDHALREKLFHFDHERIPERVVHARGFGVHGYFETYDSLADITCADIFQRKGEITPAFVRFSTVVGSKGSPDLARDVRGFAVKLYTEEGNWDIVGNNIPVFFIQDAIKFPDMVHSVKEEPDRGFPQAQSAHDNFWDFISLTPESMHMIMWVMSDRAIPRSFRFMEGFGVHSFRMVNKEGKAVFVKFHWKPKLGLQSVLWDEAVKVNGADPDFHRRDLWNAIIEGDFPEWELGLQIFDDEFAEQFEFDVLDATKIIPEEQIPIRVVGRLVLNRVVDNFFAETEQVAFCTQNIVRGIDHSEDPLLQGRNFSYLDTQLKRLGSPNFTHIPINAPKCPVHHFQQDGHMAI…
AAW31_07035_AKH37621.1	AKH37621.1	CP011451.1	Nitrosomonas communis	typical catalase Group 5	MTADKNGQGNGDFKLRDLEQNREDGTEQFLTTNQGVRINDNQNSLKAGERGATLLEDFILREKITHFDHERIPERIVHARGAGAHGYFQVYESMAKYTKAKFLQDPSVKTPVFVRFSTVVGSRGSTDLARDIRGFAVKFYTEEGNYDLVGNNAPVFFIQDAMKFPDLVHSVKPEPHNEIPQAAAAHDTFWDFISLMPESMHAIFWAMSDRAIPRSFRMMEGFGVHTFRFINEEGESHFVKFHWKPLLGLHSVLWDEATRISGKDPDFHRRDLWDAIEAGAYPEYEFGVQIIAEEDEHKFEFDLLDPTKIIPEELVPVQRIGKMTLNRNPDNFFAETEQIAFHPGHIVPGIDFTNDPLLQGRLFSYLDTQLSRLGGPNFHEIPINRPIVPIHNNQRDAQM…
AAW51_3443_AKJ30134.1	AKJ30134.1	CP011371.1	[Polyangium] brachysporum	typical catalase Group 3	MTDPRPILTTRQGHPVYDNQSLRSVGERGPATLENYQFIEKITHFDRERIPERVVHARGTGAHGYFEAYGKIGSEPARNYTRARVLTETGVRTPVFVRFSTVIGGKDSPETARDPRGFAVKLKTVDGNWDLVGNNLKIFFIRDAIKFPDMIHAFKPDPVTNRQEPWRFYDFVSQSPEALHMVTWVKSPWGIPANYREMEGAGVNTYKLVNDQGVAHLVKFHWQPKQGVRNLTSAQAAEIQAHDVGHATKDLYEAIERGDCPEWEFCVQIMSDDEHPELDFDPLDDTKRWPEDRFPLLPVGRMVLDRNPDNVFAETEQSAFGTGVLVDGIDFSDDKMLQGRTLSYSDTQRYRVGPNYLQLPINAPQPAARAHTNQRDGQMAYQVDPAGSNKHVNYEPSSV…
AAW51_4991_AKJ31682.1	AKJ31682.1	CP011371.1	[Polyangium] brachysporum	typical catalase Group 7	MTTRTTLTTASGIPVPDNQNSVTAGPRGPVLLQDFHLIEKLQHFNRERTPERVVHAKGSAAYGTFTVTEDITRYTRAKLFEQVGKQTSVLLRFSTVGGEKGSADTERDPRGFAVKFYTEEGNWDVAGNNTPVFFIKDPSKFPDFIHTQKRHPQTNLKSPTMMWDFWSLSPEALHQITTLFSDRGTPDGYRFMHGFGSHTFSFINADNERFWVKFHFRSMQGIKNLSVADAVRLAGEDPDYAQRDLFNAIEAQDFPKWRLCVQVMPEVEAETWSRKTGWNPFDITKVWPYKDYPLIEVGVLELNRNPQNYFAEVEQAAFSPANVVPGIGFSPDKMLQGRIFAYHDAHLYRVGTNYQQLPVNRPQCPYHTYQRDGSMRFDGNFGAAPNYEPNSIVSTPKQA…
AAX11_08210_AKG14613.1	AKG14613.1	CP011379.1	Moraxella bovoculi	catalase-peroxidase Group 3	MVLDELNDSKKPFAPQGGCPFHGSNTSDGQSVMTWWPKALNLDILHQHDSKVNPMGEDFNYAEELKKLDVDALKKDLEEVLRNSQDWWPADHGYYGGLMGRLSWHAAGSYRVADGRGGANTGNIRFAPLNSWPDNANLDKARRLLQPIKQKYGNKISWADLIVLAGTMGYEAAGLKTTGFAFGRTDIWHPEKDTYWGSEKEWLAKTGSKGNRWSGDRDLQNPLASVMMGLIYINPEGVDGVQDPIKTARDMRITFARMGMNDEEVVALVAGGHTIGKHHGNADASTVGAEPEAADIADQGLGWKTADKDIAKITSGLEGAWTTHPDRWDNEFFKLLFKYEDKFVSVKSPAGANQWEPSEMDIEDMPVDQNDPSIKRKITMNDGDMALIKDPEYRKISER…
AAX11_08225_AKG14000.1	AKG14000.1	CP011379.1	Moraxella bovoculi	typical catalase Group 7	MTTDTKDTQRCPYSGTPLTMNNGAPVANNQDSLTAGKRGPLLAQDLWLNEKLADFAREVIPERRMHAKGSGAFGTFTVTNDITKYTRAAIFSEVGKKTEMFARFTTVAGERGAADAERDIRGFALKFYTEEGNWDMVGNNTPVFFLRDPRKFPDLNKAVKRDPRTNMRSATNNWDFWTLLPEAFHQVTIVMSDRGIPKSYRHMHGFGSHTYSFINADNERFWVKFHFRTQQGIQNLTDAEAEAVIAKDRESNQRDLFEAIERGDFPKWKMYVQIMPEADADKVPYHPFDLTKVWPKGDYPLIEVGEFELNKNPENFFLDVEQSAFAPSNLVPGISVSPDRMLQARLFNYADAQRYRLGVNHYQIPVNKARCPVYSNQRDGQGRADDNYGGRPHYEPNSF…
AAY24_07015_AKH20148.1	AKH20148.1	CP011412.1	Sedimenticola thiotaurini	catalase-peroxidase Group 4	MQARESESKCPFHHAAGGGTSNNEWWPNQLRLDILRQHSSESNPMGAEFNYAEAFKTLDLDAVKSDLRELMTQSQEWWPADFGHYGPFFIRMAWHSAGTYRTSDGRGGAGTGNQRFAPVNSWPDNVNLDKARRLIWPIKQKYGEKISWADLIILTGNVALESMGFKTFGFAGGREDIWEPEKDIYWGAEKEWLADQRYTGEHEELENPLAAVQMGLIYVNPEGPNGNPDPLAAAKDIRETFARMAMDDEETVALIAGGHTFGKTHGAGDAALVGPEPEAAGIEEQGLGWRSSHGSGKGGDTISSGLEVTWTTTPTKWSNNFFWNLFGYDWELTKSPAGAHQWIPKHGAGANSVPDAHDPTKRTVPAMLTTDLALRFDPDYEKISRRFHENPDEFAEAFA…
AAZ33_04730_AKR77123.1	AKR77123.1	CP011516.1	Edwardsiella sp. LADL05-105	catalase-peroxidase Group 3	MGNNNEFSSGKCPVMHGGMTSAGMASKDWWPNALNLDILHQHDSKTNPMGQQFNYREALKQLDVQALKDDLRALMTDSQPWWPADWGHYGGLMVRMAWHSAGSYRIADGRGGAGTGNQRFAPLNSWPDNVNLDKARRLLWPIKKKYGNKISWADLIVLAGTMAYESMGLKTFGFAFGREDIWHPEIDTYWGSEKEWLAPSGSEGSRYSGERDLENPLAAVMMGLIYVNPEGVDGNPDPQKTANDVRVTFARMAMNDEETVALTAGGHTVGKCHGNGSAANLGAAPEGADLQEQGLGWNNHTTRGIGRDTVSSGIEGAWTSKPTQWDNGYFDMLLGHEWTLTKSPAGAWQWVPIQIAEEDKPVDVEDPSIRLLPIMTDADMAMKVDPAYRQIAERFRQDP…
AAZ33_07050_AKR77469.1	AKR77469.1	CP011516.1	Edwardsiella sp. LADL05-105	typical catalase Group 4	MHTVNKIKILTSKKKVLFFLTSLAISPSVLADTLTRDNGAPVGDNQNSQTAGPNGPVLLQDVQLLQKLQRFDRERVPERVVHARGTGAHGVFTPTADISDLTVAKVFTPGSTTPVFVRFSSVVHGTHSPETLRDPRGFATKFYTAEGNWDLVGNNFPTFFIRDAIKFPDMVHAFKPDPRTNLDNDARRFDFFSHLPESTRTLTLLYSNEGTPLSYRNMDGNSVHAYKLINDKGEVHYVKFHWKTLQGIKNLDPQQVEQIQGKDYSHMTQDLVTAINRGDYPKWDLYIQVLKPADLKNFDFDPLDATKIWPDVPERKIGQMVLNKNPDNVFQETEQVAMAPSNLIPGIEPSEDKLLQGRLFAYADTQFYRIGANGLSLPINKPHTAVNNGNQDGQLNSGH…
AAur_0634_ABM07655.1	ABM07655.1	CP000474.1	Paenarthrobacter aurescens TC1	Mn-catalase Group 05	MYLHTQLLINEIAADEPDPAAANALQEGLGGQFGEMRTMMQYLFQSMNFRGDAASKPYKDLLQGIGTEEISHVELIGTTISQLLDGSPRYQGKKSDPVDQPGAGGATPLKIALDTSNIHHYLVGAQGALPVDAAGNPWSGSYVYNSGNLVLDLLYNLMLESTGRLQKCRIYEMTENKTARSTIAYLIVRDQAHENAYAKALESLGVNWGKVLPIPKTNAEQFPEVKKLLDKGLQSIQYTFSADNLSEAGKLYRGASPSNDGTELSTDVMPEGFPITISPERKEEFAPGLDPELLALIQATAEQEMKEADSPKEAKPAATKKK
AAur_1864_ABM10281.1	ABM10281.1	CP000474.1	Paenarthrobacter aurescens TC1	typical catalase Group 5	MPTEDNIKIPGAPSIEQPAVEEPTASREPLPPKPDQQGPEAVSPTGSPTGAPANSRAQSGQYLTTAQGLRLGDTDHSLKAGPRGPILLQDHHLREKITHFDHERIPERVVHARGAGAHGTFRSYGTASKITKAGFLAPDVETPVFVRFSTVLGSRGSADTVRDTRGFSTKFYTDEGTYDLVGNNIPVFFIQDGIKFPDLIHAGKPHPDREIPQAQSAHDTFWDFVSLHTEAQAHTMWNMSDRGIPRSYRTMEGFGVHTFRLVDAAGKTTLVKFHWKPKLGVHSLVWEEAQIINGMDPDFHRRDLADAIESGAYPEWELGIQTFPDTEDQMFEGIDLLDPTKFVPEELAPVQPIGLMTLNANPTNYFAETEQVAFHPGHLVPGIDVTNDPLLQVRLFSYL…
AAur_3059_ABM08573.1	ABM08573.1	CP000474.1	Paenarthrobacter aurescens TC1	typical catalase Group 6	MTAISTTQSGAPVTSDAHSKSVGADGAIILTDHYLVEKLAQFNRERVPERVVHAKGGGAFGTFKTTSDVSAYTKAAFLQPGVETDMLIRFSSVAGENGSPDTWRDPRGFAVKFYTSEGNYDLVGNNTPVFFIRDGIKFPDFIHSQKRLPGSHLRDADMQWDFWTLSPESAHQVTWLMGDRGLPASWREMQGYGSHTYQWINAAGERFWVKYHFKSNQGVKTITGDQAEQLAGSDADFYIRDLQENIADGNFPSWELHVQVMPYEDAKTYRFNPFDLTKVWPHGDYPLIHVGTMELNKNPENYFAQIEQATFAPSNFVPGIAASPDKMLQARIFSYADAHRYRVGTNHAQIPVNQPKNQVNNYSQDGQGRYLFNSPSTPVYAPNSVGGPAAVEPTSPAGG…
AB182_10185_AKL11651.1	AKL11651.1	CP011602.1	Phytobacter ursingii	typical catalase Group 5	MSDKEQNPKNHQSPVHDASESKPGLDSLAPADGSHRPSPHLSAPGEQPTAPGSLKAPNTANEKLTALEAFRKGSENFPLTTNQGVRIADDQNSLRAGTRGPTLLEDFILREKITHFDHERIPERIVHARGSAAHGYFQPYESLSAITKADFLSDPEKITPVFVRFSTVQGGAGSADTVRDIRGFATKFYTEEGIFDLVGNNTPVFFIQDAHKFPDFVHAVKPEPHWAIPQGQSAHDTFWDYVSLQPETLHNVMWAMSDRGIPRSYRTMEGFGIHTFRMINAEGKATFVRFHWKPLAGKASLVWDESQKLTGRDPDFHRRDLWEAIEAGDYPEYELGLQLIPEEDEFKFDFDLLDPTKLIPEELVPVKRVGKMVLNRNPDNFFAENEQAAFHPGHIVPGL…
AB182_14185_AKL12382.1	AKL12382.1	CP011602.1	Phytobacter ursingii	Mn-catalase Group 03	MFRHVKQLQYTVRVSEPNPGLANLLLEQFGGPQGELAAACRYFTQGLGDDDVGRKEMLMDIATEELSHLEIIGSLVGMLNKGAKGELAEGTENEAELYRSLTQNGNDSHVTSLLYGGGPALTNSAGYPWTAAYIDTIGEVTADLRSNIAAEARAKIIYERLINVTDDPGVKDALSFLMTREAAHMLSFEKALYSIRNNFPPGKLPPIEQYTNVYYNMSEGDDPRGSWNSDENFEYVADPQPAVDGGDGLASVTLSKEQQALVKAMTKRTQSDPSVDPLTGAELGDGEPQPK
AB182_14830_AKL12502.1	AKL12502.1	CP011602.1	Phytobacter ursingii	catalase-peroxidase Group 4	MSMSEDTSPESSAGKCPFHEGGAKPAKKSSVTTNRDWWPEQLRVDLLNQHSNRSNPLGESFNYREEFKKLDYSALKADIRKVLTDSQEWWPADWGSYIGLFIRMAWHSAGTYRTIDGRGGSGRGQQRFAPLNSWPDNVSLDKARRLLWPVKQKYGQKISWGDLIILAGNVALENAGFRTFGFGAGREDVWEPDLDVNWGNEKNWLEHRHPESLAQQAIGATEMGLIYVNPEGPNASGEPTSAGAAIRATFGNMGMNDEEIVALIAGGHTLGKTHGAASADHVGAEPEAASIESQGLGWHSSYGSGAGADAITSGLEVVWTQTPTQWSNYFFENLFKYEWVQTRSPAGAIQFEAKDAPDIIPDPFHPEKKRKPTMLVTDLTLRFDPEFEKISRRFLNDPQ…
AB431_08425_AKK26709.1	AKK26709.1	CP011773.1	Mycobacterium sp. EPa45	typical catalase Group 5	MPPRRKPDQTAPKPSSPTGNTNGEAGDLDARAQSGRYLTTAQGLRLPDTDHSLKAGPRGPSLLEDFHLREKITHFDHERIPERVVHARGAAAHGVFESYGVAGYVTKAGFLGRKGKKTDVFCRFSTVLGSRGSADTVRDTRGFAVKFYTDEGNFDLVGNNMPVFFIQDGIKFPDVIHAAKPQPDREIPQAQSAHDTFWDFVSLHTEATHHVMWNMSDRGIPRSFRTMEGFGVHTFRMVNRKGATSLVKFHWKPVAGVHSLVWEEAQIAAGCDPDFHRRDMADGIEAGAYLEYELGVQVMPDDGTDSFAGIDLLDPTKLVPEEMVPVQLIGKMTLNRNPTNYFAETEQVAFHTGNLVPGIEPTNDPLMQARLFSYLDTQLTRLGGPNFTQLPINQPRCPV…
AB431_16210_AKK27970.1	AKK27970.1	CP011773.1	Mycobacterium sp. EPa45	catalase-peroxidase Group 4	MSSDTSESHPPAPNQGASTSESENPAIKSPEPKARGPRTNQDWWPNQVDVTKLHPHSPYSNPLGDDFDYATEFAKLDTAALKADLLSVITTSQDWWPADYGSYAGLFIRMSWHAAGTYRIFDGRGGGGQGMQRFAPLNSWPDNANLDKARRLLWPVKKKYGNKISWADLLVFAGNVALESAGFQTFGFGFGRPDVWEPEETLFGEEDEWLGTDKRYSGERELAEPYGATTMGLIYVNPEGPEGNPDPLKAAIDIKETFGRMAMNVEETAALIVGGHTLGKTHGAGDGDLVGPEPEGAPIEQQGLGWKCPFGTGNAGDTITSGLEVVWTPTPTKWSNSFLEILYGYEWELTKSPAGAWQFQAKDAEAIIPDPFGGPNRKPTMLVTDVSMRVDPEFGAITR…
AB431_27355_AKK29782.1	AKK29782.1	CP011773.1	Mycobacterium sp. EPa45	typical catalase Group 6	MTEKFATTDAGAPAPSLEHSLTVGPDGPILLQDHYLIEQMATFNRERIPERQPHAKGGGAFGTFEVTQDVSQFTRAAFLQPGANTEMVARFSTVAGERGSPDTWRDPRGFALKFYTSEGNFDLVGNNTPVFFMRDPMKFQNFIRSQKRLQSSNLRDHHMQWDFWTLSPESAHQVTWLMGDRGIPKTWRNMNGYSSHTYSWINAGGELFWVKYHFKTDQGVEFLTQEEGDELAGTDGDYHQRDLFDSIEAGNFPSWTLHVQIMPFEEAKTYRFNPFDLTKVWPHGDYPLHEVGRMTLNRNVIDYHAQMEQAAFEPNNIVPGTGLSPDKMLLARGFSYSDAHRHRLGVNYKQIPVNTPKVDVRSYSKDGAMRIHNVTDPVYAPNSMGGPQADPARAAEVHW…
AB433_02170_AKM11466.1	AKM11466.1	CP011770.1	Croceicoccus naphthovorans	catalase-peroxidase Group 3	MDVATGSMPGGGCPFNHGDGGVRGLLGRTNRDWWPDALQLEILHQGGVSPDPMGDDFDYKEAFNALDYTALKKDLTDLMTDSKPWWPADYGHYGPFFIRMAWHAAGTYRTADGRGGANSGQQRFAPLNSWPDNANLDKARRLLWPIKQKYGKHISWADLFVLTGNVAIESMGGPVFGFGGGRADVYEPETDVYWGTEEEWVNTGAETRIQPDKEMALENPLAAIQMGLIYVNPEGPGGVPDVEGSARDIRETFKRMAMNDEETVALTAGGHTFGKCHGAGDASLIGADPEGADIAFQGLGWTSGFESGMGEHTITSGIEGPWTNTPFEWSQNYFRLLFKYDYELTKSPAGANQWTPKNPEEADMAPDAHDPSKKVPTIMTTADMAMKVDPAYRKISERF…
AB433_07155_AKM09810.1	AKM09810.1	CP011770.1	Croceicoccus naphthovorans	typical catalase Group 6	MTDTPKCPYTTTDAGIRVQSDEHSLTVGRDGPIVLNDHYLIEQMANFNRERIPERQPHAKGSGAFGYYETTADVSKYTRAKIFQPGAKAECAVRFSTVAGERGSPDTWRDPRGFSVKIYTEDGNFDMVGNNTPIFFIRDPLKFQHFIRSQKRRADNGLRDHDMQWDFWTLSPESAHQVTYLMGDRGIPKNWREMNGYSSHTYMLINEDGEKFWVKFHWHTDQGTESGNAHLTQDEADRMAGIDGDFHRRDLFEAIAKGDHPSWTLKWQIMPFEEAKTYRINPFDLTKVWPHDDYPLIEVGKLTLTENPVDWDTQIEQLAFEPNNMVPGIGLSPDKMLLARGFSYADAHRARLGVNYKQIPVNRAKNAEVHSYSRAGKGRTVNAVDPVYAPNSYGGPGAE…
AB656_04840_AKV55630.1	AKV55630.1	CP011786.1	Bifidobacterium actinocoloniiforme DSM 22766	typical catalase Group 6	MNAKLTTNEGQPWGDNTHSQTAGKRGPILMQDYQLLEKLAHFNRERTPERVVHAKGAGAKGTFKLTRDMSQYTKADLFNGEGKETPVLIRFSQVAGEAGYPDTMRDVRGFALRFYTAEGNYDVVGNNTPVFFVNDPLKFPDFIHSQKRDPATHLRSQEMQWDFWSHSPESLHQVTYLMGDRGNPASYRTMNGYGSHTFKWVNAQGEQFWVKYHFISAQGVKDMTNEQAAKAASEDTDYLLHDLYSAIDQGDYPSWKVCVQILPYEEGLNYKTDIFDVTKTVSKKDYPRIEIGEFTLNQNPVNYFDEVEEAAFSPANFVPGIEPSPDKLLQGRLFGYKDAERYRLGANYEQLPINRPVNEVHNYERDGFMAQGQDGSVNYEPNSHDGPVEDHDARMHADS…
AB672_07340_AXI83754.1	AXI83754.1	CP011800.1	Xylella taiwanensis	catalase-peroxidase Group 4	MSASSPDTTSVVKCPFHQAVVEGTNNKDWWPNQLRVDLLHQHSNRSNPLDTTFDYAKEFQKLDYAALKRDLHALMTDSQDWWPADFGHYGGLFIRMAWHSAGTYRIGDGRGGAGRGQQRFAPLNSWPDNVSLDKARRLLWPVKQKYGQQISWADLIVLTGNVALESMGFKTFGFAGGRVDTWEPDQDVYWGRETTWLGGDVRYQNPGAHGGAMGKADQNIDSRVLENPLAAVQMGLIYVNPEGPDGHPDPLASARDIRETFARMAMNDEETVALIAGGHTFGKTHGAAPADNVGVEPEAGELEQQGLGWRNRFGSGKGEDTITSGLEVTWTNTPTQWSNGFFGNLFGYEWELTRSPAGAHQWVAKNAEATIPHAHNPSKKLLPMMLTSDLALRFDPVYA…
AB849_001635_QBK12446.1	QBK12446.1	CP036487.1	Thermoactinomyces vulgaris	typical catalase Group 2	MDQSKKRLTTNQGAPVGDNQNSRTAGRRGPTLLEDYHLIEKLAHFDRERIPERVVHPRGAGAHGVFRVINSMKEYTKAAFLQEVGKETPVFVRFSTVINSKGSPETARDPRGFATKFYTEEGNYDLVGNHLPVFFIRDAIKFPDMVHSLKPAPDTNIQSPDRYWDFMTLSPESTHMMTWLFSDYGIPANYRQMEGFSVHAFKWVNHEGKVVYVKYYWKPLQGVKNLTAEEAMEIQGKDANHATRDLFENIAKGNYPEWDLYVQIMPPEDMDKFDFDPLDATKIWPEDEYPWQLVGRMTLNRNPQNFFAEVEQAAFSPSALVPGIEPSEDKLLQGRLFSYPDTQRHRLGANYLHLPINRPIAPVNNYQTDGPMQMKQDVPTVNYEPNRYDDRPKEDPAYL…
AB849_003765_QBK14524.1	QBK14524.1	CP036487.1	Thermoactinomyces vulgaris	typical catalase Group 3	MNHKIVRGILTTRQGHPVFDNQNIKTIGNRGPATLENYHFIEKISHFDREEVPERVVHARGTGAFGYFETYGKVGDEPVEKYTRAKVFSGAGKRTPVLVRFSTVAGAKGSPETARDPRGFAVKMYTEDGNWDLVGNNLKIFFIRDPMKFPDMIHAFKPDPVSNVPNPQRMFDFVARSPESIHMITFLFSPWGIPATYRHMQGSGVNTYKWVNDKGKAVLVKYHWEPKQGIRNLTQEEAEIIQAKNVEHATQDLYEAIERGDYPEWELFVQIMEDGYHPELDFDPLDVTKLWPEDQFPWLPVGRLVLNRNPVDFHAEIEQAAFGTGVLVDGMDFSDDKMLQGRTFSYSDTQRYRIGANYLQLPVNAPRVPIRTNQHRGQMDRRDPRESGGNPHINYEPSL…
AB849_012325_QBK14319.1	QBK14319.1	CP036487.1	Thermoactinomyces vulgaris	Mn-catalase Group 07	MFKRYNRLAIELPVPEHGDANAAAAVQELLGGRFGEMSTLNNYMFQSFNFRAKKKLKPFYDLVASITAEEFGHVELVSAAINLLSTGITRPGDPDTTPLRNGLDARNTYYFIATAQTALPADSMGNPWNGTYVFNSGNLIEDFLHNFFLEIGARTHKMRVYEMTDAPVAREMIGYLLVRGGVHIVAYAKALEILTGVDVTRMLPIPSLDNSKFDYARKYIEQGLDNILYTWSEHDYRDIDRIWRGKNPETGAPLRVVVGAPKGAPMPDLEKKPEEFAPGIDKDHYEWVLKKLKFYM
AB870_13025_AKM30829.1	AKM30829.1	CP011807.3	Pandoraea faecigallinarum	typical catalase Group 6	MSKEKERSGTGSTTGAGAPAASDRNTLSVGADGPLLLHDVHFLEQMAHFNREKVPERQPHAKGAGAFGIFETTEDVSRYTKASLFRKGAKVDLLARFSTVAGEAGSPDTWRDVRGFSLKFYTDEGNYDLVGNNTPIFFVRDPMKFPHFIRSQKRLPDSGLRDNHMQWDFWTNNPESAHQVTYLMGDRGLPRTWRHMNGYGSHTYMWVNAQGEKFWVKYHFHTQQGMEFFSNAEAARMSGQDADFHRRDLFDAIVRGDYPSWILSVQVMPYADAKAYRFNPFDLTKTWSQKDYPLIKVGKMTLNRNPENFFAQIEQAAFSPGNTVPGIGLSPDKMLLGRAFAYNDAQRNRIGTNFHQLPVNRPKVPVNTYMFDGHMAFEHTGNAPVYVPNSGGRPYADQT…
AB870_15825_AKM31281.1	AKM31281.1	CP011807.3	Pandoraea faecigallinarum	typical catalase Group 7	MSDSKKLTTAAGAPVTDNQNTLTAGPRGPALLQDVWLIEKLAHFDREVIPERRVHAKGSGAFGKLTITHDITKYTRARVFESVGKETPVFLRFSTVAGERGAADAERDVRGFALKFYTDEGNWDLVGNNTPVFFIRDPLKFPDFIHTQKRDPKTNMRSPTAAWDFWSRSPESLHQITILMSDRGIPKNLRQQHGFGSHTFSFINAANERFWVKFHFKSMQGIENMTNAQAAQVVGHDRESHQRDLFEAIEAGNFPRWRMQVQVMPEADAATYRFNPFDVTKVWPHGDYPLIDVGVLELNRNPENYFADVEQAAFNPGNVVPGIGFSPDRLLQGRLFSYGDTQRYRLGVNHSAIPVNAPKCPFHNSFHRDGAMRVDGNLGSAPNYEPNRYGAFAEQPAYR…
AB870_22600_AKM32292.1	AKM32292.1	CP011807.3	Pandoraea faecigallinarum	typical catalase Group 5	MTRRKTPQSGAPSTPQTGTPAFAAVSGYRQSDGGPASAPDAASRDPGVKRSRELGQTVDGMPYNTEKASEYGAGAGIPAPGDTSKSASPAAHASTLGERLATPKTGGAATPGVNAVTGELSRVRADAQGTPLTTNQGVSVADNQNSLVGGLRGPALLKDFMLREKITHFDHERIPERVVHARGSAAHGYFESYESLTELTCAAPFAEAGKRTPVFVRFSTVAGERGSKDTARDVRGFAVKFYTDHGNWDLVGNNMPVFFIQDAMKFPDLVHAVKPEPHHAMPQAASAHDTFYDFISLSPESTHMMMWLMSDRAIPRSFRTMQGFGVHTYRFVNAQGVSKLVKFHWTPRFGTHSLVWDEAVKIAGADPDFHRRDLWESIENGQYPEWELGVQIFTEAQAD…
ABA45_07315_AKO52260.1	AKO52260.1	CP011494.1	Marinobacter psychrophilus	catalase-peroxidase Group 3	MADSNPTAGKCPVMHGGNTSVGSTNMKWWPSALNLAILNQHDSKTKPLGADFNYREELKKLDVGALKKDLNDLMTDSQDWWPADWGHYGGLMIRLAWHAAGSYRVSDGRGGAGTGNQRFAPLNSWPDNGNLDKARRLLWPVKRKYGNKLSWADLIVLAGNVAYESMGFKTFGFAFGREDIWHPEEDIYWGAEDEWLATSDNEKSRYSGDRDLEDPLAAVMMGLIYVNPQGVDGNPDPLATARDVRETFKRMAMNDEETVALTAGGHTVGKCHGNGDPANLGDAPEGAEVNEQGLGWNKKTGTVGNHTVTSGLEGAWTSNPIQWDDGYFKSLMNHDWELTKSPADAWQWEPVDMKEEDKPVDAENPSVRRNPIMTDADMAMKMDPEYRKISEKFAKDQAY…
ABAZ39_05615_AIB11495.1	AIB11495.1	CP007793.1	Azospirillum brasilense	Mn-catalase Group 03	MFMHNKNLMYTVRVAEPDPKLASLMLEQFGGPQGELAAALRYFTQGLSDEDPGRKDMLIDIATEELSHLEIIGSIVAMLTKGVKGKLAEGAEEVTDLYADIAKGNGSHTLALLYGGGPALTNSAGQLWNAGYIDSIGEPTADLRSNIAAESRAKIIYERLINITPDPGVKDALTFLMTREVAHQKMFEKALYSIENNFPPGKLPGNPEYTDKYYNMSQGDGDMRGPWNQGEQWEFVNVTPDQGPVSGGDGNPSVRLAAEEMKAVNEAAKRTMSRTDVNPVTGADLGAGPGSGKMTPVK
ABAZ39_13355_AIB12949.1	AIB12949.1	CP007793.1	Azospirillum brasilense	typical catalase Group 3	MADQSKTLTNRQGHPITNNQSQRTVGARGPATLENYQFLEKISHFDRERIPERVVHARGFVCYGEFEATGKIGDEPASKYTRAKLFQQAGKKTPLAIRFSTVIGGRDSSEVARDPRGFAVKFYTEDGNWDLVGNNLAVFFIRDAIKFPDVIHSLKPDPVTFRQEPNRIFDFMSQTPESMHMLTHLFSPRGIPANYRHMEGFGVNTYKMVNANGDTVLVKYHFHPRCGVACLTADEAAKVQGQDLGSASKDLFEAIDRGDYPQWDVFVQVMEDHDHPELEWDPLDDTKIWPESDFPLRHVGVMTLNRNVEDFFNENEQIAMGTGVLVDGLDFSDDKMLVGRTFSYSDTQRYRVGPNYQQLPINQAKNAPVATNLSGGQMSYQRDLAPGQNPHVNFEPSIH…
ABAZ39_31705_AIB16421.1	AIB16421.1	CP007797.1	Azospirillum brasilense	typical catalase Group 7	MSTLTTAAGIPVADNQNSLTAGPRGPVLMQDFHLIEKLAHFNRERIPERVVHAKGAGAYGVFRVTKDVTPYTAARFLSDVGKETEVFLRFSTVGGEKGSADAERDPRGFAVKFYTEDGNYDLVGNNTPVFFVRDPLKFPDFIHTQKRNPATNLKDPTAVWDFFSLSPETMHQLTILFSDRGTPRGYRHMDGFSSHTFSWINAAGERFWVKYHFKTRQGIQNFTAEQAVRMAGVDPDHATRDLFAAIRDGDFPAWTVSVQIMPEVEADSYRINPFDVTKVWPHADYPLVEIGELVLNRNPENFFAEVEQAAFSPANVVPGISFSPDKMLQGRLFAYADAHRYRLGANHQALPVNRPHAAEVRNHQRDGAMRFDGNGGGSPNYEPNSFGGPVQNRAVAEPP…
ABE41_002805_ANX10942.1	ANX10942.1	CP016761.1	Fictibacillus arsenicus	Mn-catalase Group 10	MFRHQKELQFEIKVERPDPQLARQIQEVLGGQFGEMTVMMQYLFQGFNCRGEEKYKDMLMDIGTEEIGHVEMLCAMISQLLDGASPDDQAKAAKDPATAAIMGGINPQHLLVSGLGGLPTNSNGVPWNGAYIVASGNLLADMRSNLHAESQGRLQVARLYHMTRDEGVRAAFRKMLARDRYHQYQWMAAIEELEQKNGVVVPASFPPEAELESQPEAYKFWNLSEGQESKEGLWATGSAQDGTGDFVYEADPVPLGNIPNPEIPAPTLHHDLDGKKFKNSNEE
ABE41_004900_ANX11335.1	ANX11335.1	CP016761.1	Fictibacillus arsenicus	Mn-catalase Group 07	MIKRFNRLAIELPTPTNPDANAAAAVQELLGGRFGEMSTLNNYMYQSFNFRKRGKLKPFFDLVSSITAEEFGHVELVSHTINLMIYGTTQPGDVNSAPMAAATDKRNTQHFIATAQTSFPFDSMGKAWNGDYVFSSGNLLLDLLHNFFLECGARTHKMRVYEMTSNPVAREMIGYLLVRGGVHVLAYAKAIEMVTGVDIKKMLPVPDLENAAFETTRKFEAEGVHRKLYTFSDTDYRDIALIWAGEHPLGGQLETIIGAPEGAPMPELRSISEEFAPGISQEDFYQIYERLKKNAGIT
ABE41_011005_ANX12539.1	ANX12539.1	CP016761.1	Fictibacillus arsenicus	typical catalase Group 6	MSNGNKHLTTSWGAPVGDNQSSMTAGSRGPTLIQDVHLLEKLAHFNRERVPERVVHAKGAGAHGYFEVTNDVRKYTKANFLSEAGKRTPLFVRFSTVAGENGSADTVRDPRGFAVKFYTEEGNYDLVGNNTPVFFIRDAIKFPDFIHTQKRHPQTHLKNPNAIWDFWSLSPESLHQVTILMSDRGIPATFRHMHGFGSHTFKWVNAEGDGVWVKYHFKTEQGVKNLSNEVAAKIAGENADYHTEDLFNAIENGDFPAWKLYVQIMPLEDANTYRFDPFDVTKVWSQKDYPLIEVGRMVLNKNPENYFAEVEQATFSPGTLVPGIDVSPDKMLQGRLFAYHDAHRYRVGANHQALPINRPRYEVNNYQRDGQMRFDNNGGGSVYYEPNSFGGPKESTENK…
ABE41_020035_ANX14311.1	ANX14311.1	CP016761.1	Fictibacillus arsenicus	typical catalase Group 5	MSEKSKMSGNTKDEQLEQFRVDDEGKKLTTNQGLKVSEDEFSLKAGERGPTLMEDFHFREKMTHFDHERIPERIVHARGFAAHGEFELYESLKEFTKANFLQDTSKKTSTFVRFSTVAGSRGSAETVRDARGFATKFYTEEGNYDLVGNNIPVFFIQDAIKFPDLVHALKPEPHNEMPQAASAHDTFWDFVANNQESAHMVMWAMSDRAIPRSFRMMEGFGVHTFRLVNDQGKAHFVKFHWKPVLGTHSLVWDEAQKISGKDADFHRRDLWESIENGDYPEYELGLQIIAEEDEFNFDFDILDPTKLWPEEDVPVKIVGKMTLNRNVDNVFAETEQVAFHPGHVVPGIDFSNDPLLQGRLFSYTDTQLLRLGGPNFHELPINRPVCPFHNNQRDGFGRQ…
ABE65_004760_ANC76156.1	ANC76156.1	CP015378.1	Fictibacillus phosphorivorans	Mn-catalase Group 07	MFKRFNRLAIELPTPTNPDANAAAAVQELLGGRFGEMSTLNNYMYQSFNFRKRGKLKPFFDLVSSITAEEFGHVELVSHTINMMIYGTTHPGDVNDAPMAAATDKRNTQHFIGTAQTSFPFDSMGKAWNGDYVFSSGNLLLDLLHNFFLECGARTHKMRVYEMTSNPVAREMIGYLLVRGGVHVLAYAKAIEMVTGVDIKKMLPVPDLENSAFETTRKFEAEGVHRKLYTFSDTDYRDIALIWAGQHPLGGPLETVIGAPAGAPMPELRSISEEFAPGISHEDFMQIAERLKKNAGIS
ABE65_020865_ANC79122.1	ANC79122.1	CP015378.1	Fictibacillus phosphorivorans	typical catalase Group 5	MSDQNKVNGNSKNVQLEQYRADDKGKKLTTNQGLKVAEDEFSLKAGERGPTLMEDFHFREKMTHFDHERIPERIVHARGFAAHGEFELYESLGEFTKANFLNDTSKTTPTFVRFSTVAGSRGSAETVRDARGFATKFYTEEGNYDLVGNNIPVFFIQDAIKFPDLVHALKPEPHNEMPQAASAHDTFWDFVANNQESAHMVMWAMSDRAIPRSFRMMEGFGVHTFRLVNDEGKAHFVKFHWKPVLGTHSLVWDEAQKISGKDPDFHRRDLWESIENGDYPEYELGLQIIAEEDEFNFDFDILDPTKLWPEEDVPVKLVGKMTLNRNVDNVFAETEQVAFHPGHVVPGIDFSNDPLLQGRLFSYTDTQLSRLGGPNFHELPINRPVCPFHNNQRDGISRH…
ABE65_021050_ANC79157.1	ANC79157.1	CP015378.1	Fictibacillus phosphorivorans	catalase-peroxidase Group 3	MENNNKPDQKEHTSAGQCPVTHHKDSAITTSRAPHGTTNKDWWPNQLNLNVLRQHDKKSNPMGDDFNYREEFSKLDYDALKKDLHALMTDSQDWWPADYGHYGPFFIRMSWHAAGTYRTADGRGGGGSGSQRFAPLNSWPDNVNLDKARRLLWPIKQKYGNKISWADLLVFTGNVAIESMGLKTFGFAGGREDIWHAEEDVYWGTEKEWLADNRYSGDRELEDPLAAVQMGLIYVNPEGPNGKPDPLASARDIRDTFSRMAMNDEETVALIAGGHTFGKAHGAGDPSLVGDDPEAADIETQGLGWLSRHGSGKGRDTISSGVDGAWTSNPTQWDYGYFDLLFGYEWELTKSRAGAYQWSPVDVTEEHMAPDAEDPSIKVKTMMTTADMALRMDPDYEKI…
ABE83_05615_ALC26616.1	ALC26616.1	CP011522.1	Streptomyces sp. CFMR 7	typical catalase Group 6	MAKRVLTTESGAPVADNQNSATAGVGGPILLQDQHLLEKLARFNRERIPERVVHARGSGAYGYFEVTDDVTGFTRADFLSEVGKRTETFLRFSTVADSLGGADAVRDPRGFALKFYTNEGNYDLVGNNTPVFFIKDPIKFPDFIHSQKRDPFTGRQEPDNVWDFWAHAPEATHQVTWLMGDRGIPASYRHMNGYGSHTYQWTNAEGEAFFVKYHFKTNQGVRSLSAEQAAELVGKDANSHQTDLLQAIERGVNPSWTLYVQVMPAAEAADYRFNPFDLTKVWPHADYPLRRVGRLVLDRNPDNVFAEVEQAAFSPNNFVPGIGPSPDKMLQGRLFAYADAHRYRLGVNHTQLPVNAPKATQADNYGRDGLHATRYGSRHDKNYEPNSYAGPAQTDAALG…
ABE83_09625_ALC27317.1	ALC27317.1	CP011522.1	Streptomyces sp. CFMR 7	typical catalase Group 6	MTDTSRKPTTSDSGAPVESDEHSLTVGPGGPILLQDSYLIEQMAQFNRERIPERQPHAKGSGAFGTFEVTADVSAYTKAALFQPGTTTDLVVRFSTVAGERGSPDTWRDPRGFAVKFYTTEGNYDMVGNNTPVFFVKDPMKFQHFIRSQKRRADNNLRDHDMQWDFWTLSPESAHQVTWLMGDRGIPRTWRHMNGYTSHTYMWINAEGQRFWVKYHFKTDQGIETFTQDEADQMAAVDTDYHTRDLFEHIRDGDFPSWTLKVQIMPYEEAKDYRFNPFDLTKVWPHGDYPLIEVGRMTLDRNPTDNHAEIEQAAFQPNNFVPGIGPSPDRMLLARLFSYADAHRHRIGGNYQQLPVNAPVAPVHTYSKDGAMAYRKTSDPVYAPNSKGGPAADTERYGT…
ABE83_11425_ALC27636.1	ALC27636.1	CP011522.1	Streptomyces sp. CFMR 7	typical catalase Group 6	MTQGPLTTEAGAPVADNQNSETAGVGGPVLVQDQALLEKLAHFNRERIPERVVHARGAGAYGTFTVTRDVTRWTRAKFLSEVGKETETFLRFSTVAGNLGAADAVRDPRGFALKFYTEEGNYDLVGNNTPVFFIKDAIKFPDFIHTQKRDPYTGSQEADNVWDFWGLSPESTHQVTWLFGDRGIPATLRHMNGYGSHTFQWNNEAGEVFWVKYHFKTDQGIKNLTQAEANKLAGEDPDSHQRDLREAIERGDFPSWTVQVQIMPAADAATYRFNPFDLTKVWPHADYPPIEIGKLELNRNPENIFAEVEQSIFSPAHFVPGIGPSPDKMLQGRLFAYGDAHRYRVGINADHLPVNRPHATEARTNSRDGFLYDGRHKGAKNYEPNSFGGPFQTDRPLWQ…
ABE83_31905_ALC31156.1	ALC31156.1	CP011522.1	Streptomyces sp. CFMR 7	catalase-peroxidase Group 4	MTENNESHVFDPVTPDSPETAIPEVPEAQATGCPVAHGRAPHPTQGGGNRQWWPDRLNLKILAKNPAVANPLGEEFDYAAAFRALDLPAVKRDIAEVLTTSQDWWPADFGNYGPLMIRMAWHSAGTYRISDGRGGAGAGQQRFAPLNSWPDNGNLDKARRLLWPVKKKYGQSLSWADLLILTGNVALETMGFKTFGFAGGREDVWESEEDVYWGPETTWLDDERYTGDRELENPLGAVQMGLIYVNPEGPNGNPDPIAAARDIRETFRRMAMNDEETVALIAGGHTFGKAHGAGPAESVGADPEGAPLEEQGLGWRSSYGTGKGGDAITSGLEVTWTSTPTKWGNEFFHNLFAYEYELTKSPAGAHQWVAKDAEATIPDAHDPAKKHKPQMLTTDLSLR…
ABE85_04915_ANH67075.1	ANH67075.1	CP011514.1	Mitsuaria sp. 7	typical catalase Group 5	MPKSPTPPASPSRKGPAASNAQGDAGPKAAARNTDSASSRAPSADAGDLALKQAAETNAMATAMPFNANKPAEHGFEEGIHPQPGVTVDAPSRLPSASTLSEAQTNAKVGTQAPEGRNATIAPLDRVRVDSSGQALTTNQGVRIADNQNSLKAGPRGPVLLEDFILREKITHFDHERIPERIVHARGSAAHGFFESYDALTDLTKAAPFKAAGKQTPVFVRFSTVQGGGGSKDTARDVRGFAVKFYTDEGNWDLVGNNIPVFFIQDAMKFPDLVHAVKPEPHHHMPEAASAHDTFWDFVSLMPESTHMLMWVMSDRGIPRSYATMQGFGVHTYRFVNEADESVFVKFHWTPKAGTHSLVWDEAVKISGADPDYHRRDLWERIESGAFPEYELGVQVFTE…
ABE85_18925_ANH69123.1	ANH69123.1	CP011514.1	Mitsuaria sp. 7	catalase-peroxidase Group 3	MSGESKCPFSGGTHHHAVAGTKGNRDWWPEQLNLSILSLHSSRTNPMSEDFKYAHEFQTLDLDAVVKDLNALMTDSQDWWPADYGHYGPFFIRMAWHSAGTYRVQDGRGGAGTGAQRFAPLNSWPDNGNLDKARRLLWPIKQKYGRKLSWADLMILAGNVALESMGFKTFGFAGGRADVWEPETDVFWGPETTWLGDERYAGDRDLANPLAAVQMGLIYVNPEGPNGNPDPAASARDIRETFKRMAMNDEETVALVAGGHTFGKAHGAGEAHHVGAMPEGGDIEDQGLGWKNALGEGMGVYTITSGIEGAWTPTPTKWDNSFFETLFGFEWELTKSPAGAHQWTPKGGAGAGTVPDAHDKSRKHAPMMTTADLALRVDPAYEKISRRYKDNPAELADAF…
ABE85_22495_ANH69657.1	ANH69657.1	CP011514.1	Mitsuaria sp. 7	typical catalase Group 7	MSAKPPHPAQCPVMTTSAGAPIADNQNSLTAGPRGPVLMQDYQLIEKLAHQNRERIPERVVHAKGWGAFGTLTVTRDITRFTRAKLFGQVGQQTPMLARFSTVAGEQGAADAERDVRGFSLKFYTGEGNWDLVGNNTPVFFIRDPLKFPDFIRTQKRHPVSNLRSGTAAWDFWSLSPESLHQVTILMSDRGIPVSPRFMDGFGSHTYSFWNADGERFWVKFHFKTRQGHRTLTNAEAGAVIGQTRESYQEDLFGAIEQGQFPQWTMSVQVMPELDADKTSYNPFDLTKVWPHAEYPLIEVGVLELNRNPENYFEEIEQAAFSPSNIVPGIGFSPDKVLQARIFSYADAHRYRLGTHYEALPVNAPKCPVHHYHKDGAMKFFRTPTGNPNAYYEPNSFGG…
ABI59_08655_ANM29633.1	ANM29633.1	CP011806.1	Acidobacteria bacterium Mor1	catalase-peroxidase Group 3	MSTESKCPVIGGAHMNMGSTKNERWWPNQLSLKPLTQNSERMDPTDDGFNYAEEFKSLDLAAVKQDINVLMTTSQNWWPADYGHYGPLFIRMTWHSAGTYRIQDGRGGGASGSHRFAPLNSWPDNANLDKARRLLWPIKQKYGRKISWADLMILAGNCALESMGFKTFGFSGGRADIWEPEEDIYWGSETEWLGDERYTGDRDLENPLGAVQMGLIYVNPEGPNANADPLAAARDIRETFARMAMNDEETVALVAGGHTFGKCHGAGDAALVGVEPEGAAIEQQGLGWKSSHGSGKGVDSITSGLEGAWTTNPVKWDNNYFENLFEYEWELTKSPAGAQQWTPKGGAGAGSVPDAHDSSKSHAPMMLTTDLALRMDPIYEPISRRFYENPEEFADAFAR…
ABO_1845_CAL17293.1	CAL17293.1	AM286690.1	Alcanivorax borkumensis SK2	typical catalase Group 6	MSDKPAKPTTTDGGIPVASDEHSLTIGADGPIVLHDHYLIEQMANFNRERIVERQPHAKGGGAFGHFEVTKDVSAYTKAAVFQPGTKTDTLIRFSTVAGERGSPDTWRDPRGFSLKFYTSEGNYDMVGNNTPVFFVRDPMKFQHFIRSQKRRADNGLRDHDMQWDFWTLSPESAHQVTWLMGDRGIPKTWRHMNGYSSHTYMWINAKDEKFWVKYHFKTDQGIECMTQDEADSMAGKDGDYHRRDLFDSIKNGDYPSWTLHMQIMPFEDAKTYRLNPFDLTKVWPHSDYPLMEVGKLTLNRNPTDFHTEVEQAAFEPNNLVSGIGLSPDKMLLARGFSYADAHRHRLGVNYKQIPVNKPKCPVNSYSKDGVGRTENVSDPVYAPNSYGGPEADPQRGQD…
ABW99_04655_AKJ67621.1	AKJ67621.1	CP011568.3	Pandoraea thiooxydans	catalase-peroxidase Group 4	MSTETKCPFNHTAGSGTSNRDWWPNQLNLKILHQHSSLSDPMDKDFNYAEAFKSLDLAAVKKDLLAVMTDSKGWWPADFGHYGPFFIRMAWHSAGTYRTGDGRGGAGAGQQRFAPLNSWPDNVNLDKARRLIWPVKQKYGRNISWADLIILAGNVALESMGFKTFGFGGGRQDVWEPEEDVYWGAENKWLDDKRYSGDRDLENPLAAVQMGLIYVNPEGPNGKPDPLAAARDIRETFARMAMDDEETVALIAGGHTFGKTHGAGDASLVGPEPEAAGLEEQGLGWKSSFGTGKGADAIGSGLEVTWTSTPTKWSNNFFWNLFGYEWELTKSPAGAHQWTPKGGAGAGTVPAAHDPSKRIAPAMLTTDLALRFDPAYEKISRRFYENPDQFADAFARAWF…
AC028_04165_AMV06124.1	AMV06124.1	CP012002.1	Xanthomonas citri pv. aurantifolii	typical catalase Group 4	MRPGHLMVLALLAPTLIAPPVFAQSVLTRDNGAKVGDNQNSQTAGATGPTLLQDVQLIQKLQRFDRERIPERVVHARGTGVKGEFTATADLSNLTKAKVFSAGEKTPVFVRFSSVVHGNHSPETLRDPHGFATKFYTSEGNWDLVGNNFPTFFIRDAIKFPDMVHAFKPDPRTNLDDDSRRFDFFSHVPEATRTLTLLYSNEGTPAGYRFMDGNGVHAYKLVNAQGEVHYVKFHWKTLQGIKNLDPKQVAAVQAKDYSHLTNDLVGAIKKGDYPKWDLYVQVLKPQDLAKFDFHPLDATKIWPDVPEQKVGQMVLNKNVDNFFQETEQVAMAPANLVPGIEPSEDRLLQGRIFSYADTQLYRIGANGLSLPVNRPRVAVNNGNQDGQGNIGQTTSGVNY…
AC028_12130_AMV07467.1	AMV07467.1	CP012002.1	Xanthomonas citri pv. aurantifolii	typical catalase Group 5	MAKSPSKSAQLPALAPASATVDVSRGTGDELHQKAGGTHPQLTTNQGIPVGDNQNSLRATPRGPTLLEDFILREKITHFDHERIPERIVHARGSAAHGYFELTKSLSQYTTAKIFTEVGEKTPLFTRFSTVAGGAGSVDTPRDVRGFAVKFYTKEGNWDLVGNNIPVFFIQDAMKFPDLIHAVKMEPDRGFPQAASAHDTFWDFISLTPESMHMVMWAMSDRTIPRSLRMIEGFGIHSFRFLNDKGESTFVKFHWRPKLGLQSTIWDEAVKIAGADQDFHRRDLFEAIQNGDFPEWELGVQLFTQAQAETFPFDHLDSTKVIPEELVPLQIVGRMVLDRWPDNFFAETEQVAYCPANIVPGIDFSNDPLLQGRLFSYLDTQLSRLGGPNFHQIPINTPK…
AC028_12615_AMV07555.1	AMV07555.1	CP012002.1	Xanthomonas citri pv. aurantifolii	catalase-peroxidase Group 4	MTTEAKCPFNHAVVGTGTTNRDWWPKQLRVDLLSQHSSKSNPLGPSFNYADAFKRLDLQALKQDLHALMTDSQDWWPADFGHYGPLFVRMAWHSAGTYRIGDGRGGGGRGQQRFAPLNSWPDNVSLDKARRLLWPIKQRYGQAISWADLMILTGNVALESMGLKTFGFAGGREDTWEPDQDLYWGHETKWLGGDERYSRGSPGVDEAHGVLVKDDDSQVPHTRDLENPLAAVQMGLIYVNPEGPDGNPDPIASARDIRDTFARMAMNDEETVALIAGGHTFGKTHGAGPADNVGAEPEAGELESQGFGWHNRYGSGKGADTITSGLEVTWTTTPAQWSNDYFDHLFGFEWELSKSPAGAHQWVAKNADAIIPDAHDASRKHRPTMLTTDLALRFDPAYE…
AC062_0194_AOF52294.1	AOF52294.1	CP013830.1	Pasteurellaceae bacterium NI1060	typical catalase Group 7	MTSKCPFSHSTPLTMGNGAPVADNQNSLTAGPRGPLLAQDLWLNEKLADFVREVIPERRMHAKGSGAFGTFTVTHDITKYTRAKIFSEVGKKTEMFARFTTVAGERGAADAERDIRGFALKFYTEEGNWDMVGNNTPVFFLRDPRKFPDLNKAVKRDPRTNMRSATNNWDFWTLLPEALHQVTIVMSDRGIPASYRHMHGYGSHTYSFWNEAGERFWVKFHFHTQQGIKNFTNEEAAELIANDRETHQRDLYEAIERGDFPKWKMFIQVMPEADAEKVPYHPFDLTKVWPKKDYPLIEVGEFELNRNPENFFADVEQSAFAPSNLVPGIGASPDRMLQARLFNYADAQRYRLGVNYRQIPVNRPRCPVHSNQRDGQGRVDGNYGGLPHYEPNSFNQWQQ…
AC20117_02030_AUI49781.1	AUI49781.1	CP018863.1	Arthrobacter crystallopoietes	typical catalase Group 7	MAENTKPLTTVAGAPVADNQDSLTAGPRGPMLLQDVWFLEKLAHFDREVIPERRMHAKGSGAFGTFTVTNDITKYSSAKIFSEVGKKTEMFARFSTVAGERGAADAERDIRGFSLKFYTEEGNWDIVGNNTPVFFFRDPLKFPDLNHAVKRDPRSNLRNAENNWDFWTNLPEALHQVTIVMSDRGIPASYRHMHGFGSHTFSFINDAGERFWVKFHHRTQQGIKNLTDAEAAKLVGDDRESHQRDLFDSIEKGDFPKWKLMVQIMPEADAETYKYHPFDLTKVWSKKDYPLIEVGEWELNRNPDNYFADVEQAAFSPANVVPGISFSPDRMLQGRLFSYGDAQRYRLGVNHHQIPVNYPRGAKVVNSYHRDGAMRIDGNQGATPGIEPNSYGRWQEQPA…
AC20117_06375_AUI50509.1	AUI50509.1	CP018863.1	Arthrobacter crystallopoietes	typical catalase Group 5	MAEKSTPETTTGANDVPIPGAPAVEPPAVEERTEPQSPLPPKPDQDAPETVSPTGTPTGAQKSANSQSGAYLTTAQGVRLYETDHSLKAGPRGPSLLQDHHLREKIMHFDHERIPERVVHARGAGAHGVFVANGAAAGVTKAGFLAAGVETPVFTRFSTVVGSRGSADAVRDTRGFATKFYTDEGTFDLVGNNIPVFFIQDGIKFPDIVHAAKPHPDREIPQAQSAHDTFWDFVSLHTEAQAHVMWQMSDRGIPRSFRTMEGFGIHTFRLQNAAGETTLVKFHWKPKQGIHSLVWEEAQLINGADPDFHRRDLADAIEAGAFPEWELGIQTFPDTPDEMFEGIDLLDPTKIVPEELAPVQTIGTLTLNANPTNFFAETEQVAFHPGHLVPGIDVTNDPL…
AC20117_10050_AUI51108.1	AUI51108.1	CP018863.1	Arthrobacter crystallopoietes	Mn-catalase Group 10	MFFHKQELQYKSTPDKPDAVYARKLQEVLGGQYGEITVAMQYSFQAWNIHIPGKYKDLLYGIGAEEFGHVEMLAKMIAQLLEKSPLGITDDAVQSDPTVAAIVGGTDVQQAIVAGAGARPVDSNGNPWMGSYVTASGNLLADFTANANAEMQGRLQVARLYHMTDDHGVRDLLSFLLARDTMHQNQWIAAARELQEEGAETLPVPSNFPLSKENRDVAYQYQNFSDGAAASEGSWASGPAPDGRGEFTYHDGPTTTGPLPEPTHPDSRFYGTTELPNIVEKTAGSVQDKLHKE
AC20117_13325_AUI51636.1	AUI51636.1	CP018863.1	Arthrobacter crystallopoietes	typical catalase Group 3	MTDAANRPPAEGDDRFILTNRQGHQVYDNQNQRTVGPRGPATLENYQFLEKISHFDRERIPERVVHARGFVSFGTFEATGKWGDEPISQYTRAKLFQEAGKKTDVAVRFSTVIGGHDSSEAARDPRGFAVKFYTEDGNWDLVGNNLAVFFIRDAIKFPDVIHALKPDPITFRQEPARIFDFMSQTPECMHMLVNLFSPRGIPADYRHMQGFGVNTYKWCNKTGDTVLVKYTWQPHQGVKSLTEADAANIQANDTGHASKDLFEAIERSDFPKWDLYVQMMSDDEHPELDWDPLDDTKTWPEQDFEPQLVGTMTLNENVSDHHNENEQIAFGTGVLVDGLDFSDDKMLVGRTFSYSDTQRYRVGPNYLQLPVNSPRRVQVATNQTGGQMSYGRDLGVGQN…
AC20117_14535_AUI51824.1	AUI51824.1	CP018863.1	Arthrobacter crystallopoietes	catalase-peroxidase Group 4	MTDRQDHPPIPTPGSAQGLDRKVEAGCPVAPDSVTSHGSESENPAIDSPQPKAHRPRTVADWWPNQLDLSVLHAHNQAGNPLGPTFSYREEFQKLDVEALKQDIIQVLTTSQDWWPADFGHYGGLMIRMSWHAAGTYRVHDGRGGAGDGSQRFAPLNSWPDNANLDKARRLLWPVKQKYGRKLSWADLLVLAGNVALESMGFKTFGFAFGREDVWEPEEIFWGPEDTWLGDERYVGEGTMAPEVGSTEMGLIYVNPEGPMGNPDPKLAAAFIRETFKRMAMNDEETFALIAGGHTFGKTHGAADADAHVGPEPEAANLEDQGLGWLSTYGTGKGGDTITSGLEVTWTDRPTQWSNRFLEILFEHEWELVKSPAGANQWVAKDAPEIIPDAHDPEKKHRP…
AC731_009635_AMO37194.1	AMO37194.1	CP014646.1	Thauera humireducens	catalase-peroxidase Group 3	MSENSMNTAGKCPVMHGGNTAAANSVMAWWPKALNLDILHQHDTKTNPLGADFNYREELKKLDVDALKNDLKALMTDSQEWWPADWGHYGGLMIRMAWHAAGTYRIADGRGGGGTGNQRFAPLNSWPDNGNLDKARRLLWPIKKKYGNKISWADLIILAGNMAYESMGFKTFGFAFGREDIWHPEKDIYWGSEREWLAPSGSEGSRYSGQRDLENPLAAVMMGLIYVNPEGVDGKPDPIKTAHDMRVTFARMAMNDEETVALTAGGHTVGKTHGNGSAANLGPAPEGADLEEQGFGWMNHTTRGIGRNAVTSGIEGAWTTHPTKWDNGYFDMLFKHDWWLQKSPAGAWQWEPVNIKEEDMPVDVEDPSIRRKPIMTDADMALRFDSEYRKIAERFRNDQ…
AC801_05960_AZU29410.1	AZU29410.1	CP012060.1	Xanthomonas sp. ISO98C4	typical catalase Group 5	MAKSPSKSAQVPALAPVSATVDGARGTGDELHQKAGGTHPQLTTNQGIPVGDNQNSLRATPRGPTLLEDFILREKITHFDHERIPERIVHARGSAAHGYFELTKSLSQYTTAKIFTEVGEKTPLFTRFSTVAGGAGSVDTPRDVRGFAVKFYTKEGNWDLVGNNIPVFFIQDAMKFPDLIHAVKMEPDRGFPQAASAHDTFWDFISLTPESMHMVMWAMSDRTIPRSLRMIEGFGIHSFRFLNDKGESTFVKFHWRPKLGLQSTIWDEAVKIAGADQDFHRRDLFEAIQNGDFPEWELGVQLFTEAQAATFPFDHLDSTKVIPEELVPLQIVGRMVLDRWPDNFFAETEQVAYCPANIVPGIDFSNDPLLQGRLFSYLDTQLSRLGGPNFHQIPVNAPK…
AC801_06595_AZU29531.1	AZU29531.1	CP012060.1	Xanthomonas sp. ISO98C4	catalase-peroxidase Group 4	MTTEAKCPFNHAVVGTGTTNRDWWPKQLRVDLLSQHSSKSNPLGQSFNYADAFKRLDLQALKRDLHALMTDSQEWWPADFGHYGPLFVRMAWHSAGTYRIGDGRGGGGRGQQRFAPLNSWPDNVSLDKARRLLWPIKQKYGQAISWADLMILTGNVALESMGFKTFGFAGGREDTWEPDQDLYWGRETKWLGGDDRYSRGSPGVDEAHGVLVKDDDSQVPHTRDLENPLAAVQMGLIYVNPEGPDGNPDPIASARDIRDTFARMAMNDEETVALIAGGHTFGKTHGAGPADNVGAEPEAGELESQGLGWHNRYGSGKGADTITSGLEVTWTTTPAQWSNDYFDHLFGFEWELSKSPAGAHQWVAKNADAIIPDAHDASRKHRPTMLTTDLALRFDPAYE…
AC801_19980_AZU32071.1	AZU32071.1	CP012060.1	Xanthomonas sp. ISO98C4	typical catalase Group 4	MRPGHLMVLALLAPTLIAPPVFAQSVLTRDNGAKVGDNQNSQTAGATGPTLLQDVQLIQKLQRFDRERIPERVVHARGTGVKGEFTATADLSSLTKAKVFSAGEKTPVFVRFSSVVHGNHSPETLRDPHGFATKFYTSEGNWDLVGNNFPTFFIRDAIKFPDMVHAFKPDPRTNLDDDSRRFDFFSHVPEATRTLTLLYSNEGTPAGYRFMDGNGVHAYKLVNAQGEVHYVKFHWKTLQGIKNLDPKQVAAVQAKDYSHLTNDLVGAIKKGDYPKWDLYVQVLKPEDLAKFDFDPLDATKIWPDVPEQKVGQMVLNKNVDNFFQETEQVAMAPANLVPGIEPSEDRLLQGRIFSYADTQLYRIGANGLSLPVNRPRVAVNNGNQDGQGNIGQTTSGVNY…
AC806_05300_AOF48842.1	AOF48842.1	CP012047.1	Tetragenococcus halophilus	typical catalase Group 7	MEKDPMAKNGLDSYQSSRNQNVGNNPELQTNAGAPVFNNDNTMTAGERGPSMLQDVWLLEKLADFNREVIPERRMHAKGSGAFGTFTVTHDITKYTKAEIFSEIGKQTEMFARFSTVAGERGAADAERDIRGFALKFYTEEGNWDLVGNNTPVFFHRDPKHFIDLNRAIKRDPRTNMRSPNNNWDFWTSLPESLHQVTITMSDRGIPSSYRFMHGFSSHAYSLINADNERVWVKFYFRSQQGIQNLTDQEADIVNANTRESHQADLYNAIEEGKYPKWKMYIQVMTQEEANQLDYNPFDLTKVWYKEDFPLMEVGEFELNKNPDNYFQDVEEASFNPAAQVPGIGISPDRMLQTRVFAYQDAARYRIGVNHHQIPVNAPRGVKNPHPYSRDGQGRMDGN…
ACG10_08475_ASL26328.1	ASL26328.1	CP011835.1	Azotobacter chroococcum	typical catalase Group 7	MTEKKLTTAAGCPVVDNQNAMTAGPRGPQLLQDVWFLEKLAHFDREVIPERRMHAKGSGAYGTFTVTQDISRYTRAKLFSAVGKQTELFVRFSTVAGERGAADAERDIRGFAVKLYTEEGNWDLVGNNTPVFFLRDPLKFPDLNHAVKRDPRTNLRSAKNNWDFWTLLPEALHQITIVMSDRGIPASYRHMHGFGSHTYSFINAQNERYWVKFHLKCMQGIRNLSDAEAEAAIGKCRETHQRDLYEAIEGGDFPKWQFCVQVMPEQDAARVPYHPFDLTKIWPHKDYPLQEVGILELNRNPDNYFAEVEQAAFNPANVVPGIGFSPDKMLQGRLFSYGDAQRYRLGVNHAHIPVNAPRCPVHSYHRDGAMRVEGNFGSTLGYEPNGYGEWREQPDFREP…
ACG10_20990_ASL28797.1	ASL28797.1	CP011836.1	Azotobacter chroococcum	catalase-peroxidase Group 4	MSDEKKASCPFHQTAGGGMSSRDWWPNHLRLDLLHQHSSKSDPMGETFNYAEEFKSLDLEAVKADLRAVMTDSQDWWPADFGHYGPLFIRMAWHAAGTYRIGDGRGGAGRGQQRFAPLNSWPDNVSLDKARRLIWPVKQKYGRKISWADLIVLTGNVALESMGFKTFGFAGGREDVWEPDLDVYWGKETTWLGGDKRYSGDRELENPLAAVQMGLIYVNPEGPDGNPDPLAAARDIRETFARMAMDDEETVALIAGGHTFGKTHGAGPASHVGADPEAAGLENQGLGWGSSFGSGAGGDAITSGLEVTWTSTPTRWSNNFFWNLFGYEWELTRSPAGAHQWQPKHGAGAGSIPDAHDKEKRRAPSMLTTDISLRVDPAYEKISRRFYENPDQFADAFAR…
ACG33_09110_AMN47250.1	AMN47250.1	CP011971.1	Steroidobacter denitrificans	typical catalase Group 6	MSGSNKNAGGSTMGSGAPAPSDRNSLTVGANGPILLHDVHFLEQMAHFNREKVPERQPHAKGSGAFGNFKVTEDVSRFTKAALFRKGAVTDVLARFSTVAGEAGSPDTWRDVRGFSLKFYTDEGNYDLVGNNTPVFFIRDPIKFPHFIRSQKRLPDSGLRDNHMQWDFWTSNPETAHQVTYLMGERGLPRTWRNMNGYGSHTYMWINAKGDKFWVKYHFHTCQGMAFFSNAEAAAMAGADADFHRRDLFDAIARGEHPAWVLSVQVMPYADAKTYRYNPFDLTKTWPHKDYPLIKVGTMTLNRNPENFFAQIEQAAFSPGNTVPGIGLSPDKMLLGRAFAYNDAQRNRIGTNFHQLPVNRPKVPVNTYMFDGQMAYEHSGNAPVYAPNSGGRSWADETG…
ACH24_03190_ALB01720.1	ALB01720.1	CP012505.1	Francisella persica ATCC VR-331	catalase-peroxidase Group 2	MLKKIVTALGMSGMLLASNSAIAEDVTSKNDSLTPQSIDLSPLRNLNKLDSPMDKDYNYHQAFKKMDTEQLKKDMQDLLTQSQDWWPADFGNYGPFFIRLSWHDAGTYRVYDGRGGTNRGQQRFSPLNSWPDNVNLDKARQLLWPIKQKYGDAVSWSDLIVLAGTVSLESMGMKPIGFAFGREDDWQGDDTNWGASPEELSSNVKDGKLVKPFSATEMGLIYVNPEGPDGKPDIKGAVSAIRQAFSGMGMIDKETVALIAGGHTFGKTHGAVLANKVKQSIGPAPDKAPIEQQGLGWHNSYGTGNGDYTMSSGLEGSWTSTPTFWNHDFLNNLYNLDWKKTLSPAGAHQWTPTNAKQENMVPDAHKPGIKHKPIMLTTDLALKEDPIFNKYAQEFYKNP…
ACH33_13930_AMA73848.1	AMA73848.1	CP014140.1	Aneurinibacillus sp. XH2	Mn-catalase Group 01	MWFYEKKLQYPVRVSKCDVRMAKFLIEQYGGSDGELAAALRYLNQRYTVPDKVIGVLNDIGTEELAHLEMIATMVYKLTKDATPEELEKHGLGEHYANHDKALFYNNAAGVPFSVTYIAAKGDPIADLYEDIAAEEKARATYQWLINMTDDPDLKDSLSFLREREIVHSQRFREAVEILKEERDHKKIF
ACH46_00835_ALG83317.1	ALG83317.1	CP011853.1	Gordonia phthalatica	typical catalase Group 6	MTQEPNHTTTDSGAPAGSDEHSLTVGAAGPIVLHDHYLIEQMAQFNRERIAERQPHAKGSGAFGTFETTSDVSQFTCASLFQPGVKTEMVARFSTVAGERGSPDTWRDPRGFALKFYTDDGIYDMVGNNTPVFFIKDPMKFQHFIRSQKRRADNNLRDHDMQWDFWTLSPESSHQVTWLMGDRGIPRTWRHMNGYSSHTYLWVNVDGVKHWVKYHFISDQGVEFLTQDEADTLAGQDGDYHVRDLFDSIAKGDHPSWTLKVQLMPFDDAKDYRFNPFDLTKVWPHADYPLINVGRMTLHTNPTDNHAQIEQAAFEPSNTVPGIGFSPDRMLLGRVFAYSDAHRARLGANYKQIPVNRPHSDVRSYSKDGAMRIDPVSDPVYAPNSKGGPVADYPGQPEP…
ACH46_10605_ALG84868.1	ALG84868.1	CP011853.1	Gordonia phthalatica	catalase-peroxidase Group 4	MSDQQPAASATGCPVHGGQMAAPSEGGGNRDWWPKQLNLKLLAENPDEGNPMDPDFDYAKAFSALDLDAVRRDLKALMRDSKDWWPADYGHYGPLFIRMAWHSAGTYRVADGRGGGGHGMQRFAPLNSWPDNAGLDKARRLLWPIKKKYGSSLSWGDLIIFAGNVALESMGFKTFGFAGGRTDKWEPEEIYWGPETEWLEDQRYTGERDLDNPLAAVQMGLIYVNPEGPNGNPDPLKSAIDIRETFARMAMDDEETVALIAGGHTFGKTHGAADAGQYVGPVPEDAPLETMGLGWKGSYGTGSGVDAISSGLEGAWNSTPVTWDNNFFWTLYGYEWETHTGPGGAIQWRPKDNAGATSVPDAGDPEKRHQPMMLTSDIALREDPIYGPISRRFLENPQD…
ACJ67_01460_AKR42240.1	AKR42240.1	CP012020.1	Methylophilus sp. TWE2	typical catalase Group 5	MAKASKTQVGLGSILSTVSGPSTHEPPMSSMEGAVPPDLIDKVVGGDVLSQAFPYNETKAAEYGKKARCPMTGIAREADDAVVRASTITEDNPNEKTGEGATEGENMLKGDLDRVRSDSNLQALTTNQGVTVGDNQHSLKIGLRGPTALEDFILREKLTHFDHERIPERVVHARGSAAHGYFENYQPLTAVTKATPFSEAGKQTPVFVRFSTVAGERGSTDTARDVRGFAVKFYTDEGNWDLVGNNIPVFFIQDAMKFPDLVHAVKPEPHNAIPQASSAHDTFWDFISLMPESTHMVMWQMSDRAIPRSYRMMQGFGVHTFRLVNADNESVFCKFHWTPMAGTHSLIWDEAVKISGADPDFHRRDLWEAIEAGAYPEWELSLQIFTEEQADSFDFDVLD…
ACJ67_14080_AKR44409.1	AKR44409.1	CP012020.1	Methylophilus sp. TWE2	catalase-peroxidase Group 3	MENKQNTAGQCPFGHGAMTASGKTNTNWWPNALNLDILHQHDRKTNPLGEAFDYRKEVATLDVAAVKKDLHALMTDSQEWWPADWGHYGGLMIRLTWHAAGTYRVADGRGGAGTGSQRFAPLNSWPDNGNLDKARRLLWPIKKKYGNKLSWADLIALAGTIAYESMGLKTFGFAFGREDIWHPEKDIYWGNETEWLAKTGSQGSRYSGERDLENPLAAVMMGLIYVNPEGVDGNPDPLKTAQDMRVTFARMAMNDEETVALTAGGHTVGKAHGNGQAGNLGPNPEAADVHEQGLGWNNHVGRGVGRDAVTSGIEGAWTTHPTKWDNGYFAMLFNHEWALQKSPAGAWQWEPVSIREEDKPVDVEDPSIRYNPIMTDADMALIKDPVYRKISERFRDDQA…
ACLO_1776_QKF90259.1	QKF90259.1	CP053833.1	Arcobacter cloacae	catalase-peroxidase Group 3	MAGKCPMGFGSSNPMARNGGTSNKDWWPNQLNLKILSQHSNKVNPLGDDFDYAKEFAKLDYDALKADLTTLMTDSQEWWPADYGHYGPLFIRMAWHSAGTYRTADGRGGASTGSQRLAPLNSWPDNANLDKARRLLWPIKQKYGNKISWADLMILAGNVAIESMGLKTFGFSGGRVDVWEPEEDIYWGKEAEWLATSDKENSRYQGERDLENPLAAVQMGLIYVNPEGPDGEPDPIKSGIDIRETFKRMAMDDEETVALTAGGHTFGKCHGAGDAANVGAEPEAEGLVAQGLGWLSKFLSGKGDDTITSGIEGSWTANPTRWDNEYFDILLGYEWELVKSPAGAWQWQPINPKEEHLAPAAHNPNKKVTTIMTTADMAMKMDPIYGEISKRFHKNPDQF…
ACMV_07490_BAJ80096.1	BAJ80096.1	AP012035.1	Acidiphilium multivorum AIU301	typical catalase Group 7	MTDTPFTNATGAPVAENTNVMTAGPRGPVLLQDIWLIEKLAHFDREVIPERRMHAKGWGAYGSFTVTQDITRYTKAKIFSDIGKRTDIFVRFSSVAGERGAADAERDIRGFSVKFYTEEGNWDIVGNNTPVFFFRDPLRFPDLNHAIKRDPRTGLRSADNNWDFWTLLPEALHQVTIVMSERGIPKSFRHMHGFGSHTFSMINAANERVWVKFHFRSQQGIANLTDAEAEAVVARDRESHGRDLLAAIEAGNLPRWTLMIQVMTEAQAKVHRHNPFDLTKVWPKAEYPLIEVGVLELDRAPDNYFAEVEQAAFSPANIVPGISFSPDRMLQARLFSYGDAQRYRLGVNFNQIPVNAPRCPFRSYHRDGAMRTDGNLGGIVSYHPNTGRIWDDQPAHAEP…
ACMV_20920_BAJ81439.1	BAJ81439.1	AP012035.1	Acidiphilium multivorum AIU301	catalase-peroxidase Group 4	MSTEAKCPVTGGATRSSSAGIQSNADWWPNQINLGMLHQHSALSNPMDPDFDYAAEFKTLDLDAVIADLKALMTDSQDWWPADFGHYGPLFVRMAWHAAGTYRIGDGRGGAGAGQQRFAPLNSWPDNANLDKARRLLWPVKQKYGRKISWADLMVLAGNVALESMGFKTFGFGAGRVDTWEPDQGIYWGPETTWLDDKRYSGDRDLENPLAAVQMGLIYVNPEGPNGKPDPVAAARDIRETFARMAMNDEETVALIAGGHTFGKTHGAGDAALVGPEPEAAPIEQQGLGWISSYGTGKGSDAITGGPEVTWTQTPTQWSNFYFDNLFNYEWELTKSPAGAWQWVAKDAGDVIPDAFDAAKKHRPTMLTTDLSMRMDPAYEKISRRFHQNPDEFADAFAR…
ACP90_20025_AMN54320.1	AMN54320.1	CP011927.1	Labrenzia sp. CP4	catalase-peroxidase Group 3	MDAKVEKTGGCPVMHGGNTAMDKPVTKWWPDALNLDILHQRGARTNPMDPDFNYREAVKGLDHEAVKADVRALMTESQDWWPADWGHYGGLMIRLAWHSAGSYRMQDGRGGAGSGNIRFAPLNSWPDNASLDKARRLLWPVKKKYGNALSWADLIILAGNMAYESMGFKTFGFGFGREDIWGPETDVYWGSEKEWLAPVENRFENADDATSLENPLAAIHMGLIYVNPEGVNGQPDPVRTAAHVRETFKRMAMNDEETAALTCGGHTVGKAHGNRSAEGIGVEPEAAGVESQGFGWANTEQGGKASNAFTSGIEGAWTQFPIQFDMGYFDYLFNYDWELRKSPAGAWQWEPVNMPEDKKPVDASDPSIRRNPMMTDADMGMKMDPVYNEICRKFMADEA…
ACPL_3139_AEV84034.1	AEV84034.1	CP003170.1	Actinoplanes sp. SE50/110	typical catalase Group 5	MEARSPAEVIKDAVTAVTSEKKPDVPGAPGSGTPTVEEPATPREPLPPKPEQGQPDTRTPTGAPTGAPPTAYGQQGPYLTTAQGARLRDTDHSLKAGPRGPILLQDHHFREKITHFDHERIPERVVHARGAGAHGVFTSYGTAAALTQAGFLKEKGKQTDVFVRFSTVLGSRGSADTVRDTRGFATKFYTDEGTFDLVGNNMPVFFIQDAIKFPDIVHAAKWHPDREIPQAQSAHDTFWDFVSLHTEAQHHTMWNMSDRGIPRSYRTMEGFGVHTFRLVNDAGETVLVKFHWKPKLGVHSLVWEEAQITNGVDPDFHRRDLYDSIEAGAYPEWELGLQVFPDNPEETFAGIDLLDPTKIVPEELAPVQPVGKLVLNRTPTNFHAEVEQVAFHLGNLVPG…
ACPL_3148_AEV84043.1	AEV84043.1	CP003170.1	Actinoplanes sp. SE50/110	catalase-peroxidase Group 4	MSDIQDQKASGCPVAHDSATGHGGSESENPGIPSPQARTGGRPRGNRDWWPNQLDLSVLHAHSSKSNPLGEAFSYAAEFAKLDVEALKRDITEVLTTSQDWWPADFGHYGGLMIRLSWHAAGTYRIQDGRGGAGDGGQRFAPLNSWPDNANLDKARRLLWPVKQKYGQQISWADLLVLAGNVALESMGFQTFGFGFGRVDTWEPEEIFWGPEDAWLGDERYVSDKTMSEGVGATEMGLIYVNPEGPRGNADPAQAAHFIRETFARMAMNDEETVALIAGGHTFGKTHGAAVAADHVGPEPEGAPLEAQGLGWLSTHGSGRAGDTITSGLEVTWTDKPTQWSNRFFEILFGYEWELTTSPGGAKQWVAKDAEAIIPDAHDPAKKHKPTMLTTDLSLRVDP…
ACPL_8199_AEV89077.1	AEV89077.1	CP003170.1	Actinoplanes sp. SE50/110	catalase-peroxidase Group 4	MADELAAENRAERAGKCPVAHGTASHGGRGNRDWWPNALDLTVLHRNPVVGNPLGGDFDYAEAFSSLDLAAVKADITALLTDSQDWWPADFGHYGPLFIRMAWHSAGTYRTFDGRGGGGAGEQRFAPLNSWPDNGNLDKARLLLWPVKKKYGKNLSWADLMILAGNVALESMGFETFGFGGGRADVYEPEEVNWGSEDTWLGDERYSGDRELASPLGAVQMGLIYVNPEGPNGNPDPLASARDIRDTFGRMAMNDEETVALIAGGHTFGKTHGAGPASHVGPEPEAAPIEQLGSGWKSSYGTGVGGDAITSGLEGIWTPTPTRWDNTFFETLFKYEWTLSESPAGAKQWVPTSPDAEGTVPDAHDPAKRHVPTMLTSDLALRFDPIYEPISRRFYENPE…
ACPOL_4041_AXC13320.1	AXC13320.1	CP030840.1	Acidobacteriaceae bacterium SBC82	catalase-peroxidase Group 4	MASTGTEFTSQAKSEVNAQVASEAKCPVDHGAIAASPVSKPSGPRTNRDWWPNHLRLELLHAHSELSDPMGAEFDYATEFKTLDYEGLKKDLAFVMTDSQDWWPADFGHYGPLFIRMAWHSAGTYRTYDGRGGGGRGQQRFAPLNSWPDNVNLDRARRLLWPVKQKYGKKISWADLMILAGNVALETMGFKTFGFAGGRPDTWEPDHDVDFGAEATWMGTDKRYSGERELANPLAATTMGLIYVNPEGPEGKPDPAGSAKDIRVTFGRMAMNDEETVALIAGGHTFGKTHGAGPGTHLAHEPEGAPIENQGLGWTSAYKTGIAGDAITSGLEVTWTTKPTQWSNEYFDHLFKFEWELTQSPGGANQWKPKGDAGANTIPDAHDPNKKKQPAMLTSDVAL…
ACPOL_4802_AXC14068.1	AXC14068.1	CP030840.1	Acidobacteriaceae bacterium SBC82	typical catalase Group 7	MSEKKFTSATGMPIADNTNIVTAGPRGPALLQDVWLIEKLAHFDREVIPERRMHAKGWGAYGTFTTTHDITRFTKAKIFDKVGKQTRLFLRFSSVAGERGAADAERDIRGFAVKFYTEEGNWDIVGNNTPVFFFRDPLRFSDLNHAIKRDPRTGLRSAQNNWDFWTLLPEALHQVTIVMSERGIPKSFRHMHGFGSHTFSLINAANERVWVKFHFRSQQGIENLTDAEASAIIANDRESHGRDLLGAIEQGAFPRWTLYIQVMTDAQAKQHKHNPFDLTKVWPKAEYPLIEVGVMELNKYPENYFAEVEQAAFSPANVVPGISFSPDKMLQARLFSYGDTQRYRLGVNFNHIPVNAPKCPFLAYHRDGAMRTDGNLGATVSYHPNSLGVWSNQPEYAEP…
ACP_0213_ACO32804.1	ACO32804.1	CP001472.1	Acidobacterium capsulatum ATCC 51196	catalase-peroxidase Group 3	MSTESKCPFAGGAYANTEAGAKGNRDWWPKQLNLDILHQHSSLSNPLEENFDYASEFQSLDLDAVVKDLHALMTTSQDWWPADFGHYGGLFIRMAWHSAGTYRIYDGRGGASRGAQRFAPLNSWPDNVNLDKARRLLWPIKQKYGRKISWADLMILAGNVALESMGFKTFGFGGGREDIWEPEKDINWGPETTWLGDERYSGNRELANPLGAVQMGLIYVNPEGPNGNPDPLASARDIRETFARMAMNDEETVALIAGGHTFGKTHGAAPASHVGLEPEGASIEEQGLGWKNSFGTGVGKDAITSGLEVIWTPTPTQWDMSYLETLYGYEWELTKSPAGAHQWKPKGDAGAGTVPDAFDAKKRHQPSMLTSDIALRTDPAYDKICRDFMAHPDKYADAF…
ACRYD_1626_AYJ78743.1	AYJ78743.1	CP032825.1	Arcobacter cryaerophilus D2610	typical catalase Group 7	MKKTMTTTGGNPIADNQNSLTAGERGPVLLQDYQLIQKLAHQNRERIPERVVHAKGSGAFGVLEITEDISKYTKAKVLQKGEKTKLLLRFSTVAGERGAADAERDVRGFALKFYTKEGNWDLVGNNTPVFFVRDAYKFPDFIHTQKRDPQTNLRSNTAMWDFWSLSPESLHQVTILMSDRGLPKSYRNVNGYGSHTYSLINSKNERFWVKFHFKTLQGIETITNKEAEALVGKDRESNQRDLFENIEKGNFPKWSFEIQIMSEEEAKKCSFNPFDLTKVWPHGDYPMIKVGTMTLNENPKNYFQQVEQASFSPSNIVPGISYSPDKMLQARIFSYPDAQRYRVGTHYEMLPVNRPIVEVNTYNLDGSMNFDIKEPTKAFYEPNSFDGPVEDKSYLEPDL…
ACTIVE_4612_QKG22971.1	QKG22971.1	CP053892.1	Actinomadura verrucosospora	catalase-peroxidase Group 4	MSENNEAAAGQCPVAHQRAPHPTQGGGNRGWWPDRLNLKLLAKNPPVTNPLGEDFDYAEAFNSLDLAAVKRDIAAALTDSQDWWPADHGNYGPLMIRMAWHSAGTYRVSDGRGGAGAGQQRFAPLNSWPDNASLDKARRVLWPVKKKYGRKISWADLMVLTGNVALETMGLKTFGFAGGREDAWEAEEDVFWGPETAWLDDERYSGDRDLEKPLAAVQMGLIYVNPEGPNGNPDPLAAARDIRETFARMAMNDEETVALIAGGHTFGKTHGAGPADAIGPEPEGAPLEDQGLGWKNSHGTGKGRDSHTSGLEVTWTNTPTKWDNSFFEILFGYEWELEKSPAGAHQWRPKNGAGANTVPDPEDGTLNRAPGMLTTDLSLRFDPIYEPISRRFKDNPDEF…
ACTIVE_5497_QKG23854.1	QKG23854.1	CP053892.1	Actinomadura verrucosospora	typical catalase Group 3	MTDVASRGAQPGDDRPVLTNRQGHPVYDNQNQRTVGARGPATLENYQFLEKISHFDRERVPERVVHARGATAFGYFEAYGKWGDEPISRYTRAKLFQEAGKRTPVALRFSTVIGGRDSAETARDPRGFAIKFYTEDGNWDLVGNNLAVFFIRDAIKFPDVIHALKPDPVTFRQEPNRIFDFMSQTPETMHMIVNVFGPRGIPADYRHQQGFGVNTYKWVNEAGDTVLVKYHWIPKQGVRSMTAADAAVVQADDLGHATKDLHDAIDRGEYPEWELVVQMMSDDDHPELDFDPLDDTKVWPENDFPPRPVGRIVLDQNVANNFAENEQIAFGTGVLVDGLDFSDDKMLVGRTFSYSDTQRYRVGANYLQLPVNQAKGAQVRTNQRDGQMTYFVDGAGENP…
ACTIVE_8462_QKG26809.1	QKG26809.1	CP053892.1	Actinomadura verrucosospora	typical catalase Group 5	MANPAGHEDRKQEQLERRRVGPEGAAGLTTDQGVRVDDTDNSLTVGERGPSLMEDFHLREKITHFDHERIPERVVHARGSGAYGQFTLTESLADYTTAEFLCDTSLTTPVFVRFSTVAGSRGSADTVRDVRGFATKFYTNQGNFDLVGNNMPVFFIQDGIKFPDFVHAVKPEPPNEIPQASSAHDTLWDFVQLQPETMHMMMWLMSDRAIPRSYAMMQGFGVHTFRLVNAEGRATFVKFHWRPKLGTHSLAWDETQKIAGKDPDFNRRDLWDRIDDGDFPEYELGVQLVAEEDEHKFGFDLLDPTKIIPEEEVPLRTVGRMVLNRNPDNFFAETEQVAFHIGNVVPGIDFTNDPLLQARLFSYLDTQLIRLGGPNFPQIPVNQPVADVRNHQRDGYHQM…
ACTI_56440_BBH68959.1	BBH68959.1	AP019371.1	Actinoplanes sp. OR16	typical catalase Group 5	MPEPTLPSPASLDPAESTPLQASLAPERGLQTGEALTTAQGLRLSDTDHSLKAGTRGPALMEDFHLREKITHFDHERIPERVVHARGSGAYGVFTAYGNAASITKAGFLAEKNKQTEVFVRFSTVLGSRGSADTVRDVRGFATKFYTDEGNFDLVGNNMPVFFIQDGIKFPDLIHAAKWHPDREIPQAQTAHDTFWDFVSLHTEATHHVLWAMSDRAIPRSYRTMEGFGVHTFRLVNAAGETALVKFHWKPVAGVHSLAWEEAQIAAGVDPDFHRRDLTDSIDAGLFFEYELGVQVMPDTGDETFQGIDLLDPTKMVPEELAPVQPIGKLVLNRNTDNFHAETEQIAFHMGNLVPGIEVTNDPLLQARLFSYLDTQLSRLGGPNFTQLPINRSHAPVND…
ACTI_59770_BBH69292.1	BBH69292.1	AP019371.1	Actinoplanes sp. OR16	catalase-peroxidase Group 4	MSDPQGAAGKCPVAHDSVTAHGSESENPAIDSPTPKTGGRPRTNRDWWPNQLDLSVLHAHSSKGNPLGADFEYAKEFAKLDVDALKADITEVLTTSQDWWPADFGHYGGLMIRLSWHAAGTYRIQDGRGGAGDGGQRFAPLNSWPDNANLDKARRLLWPVKAKYGQKISWADLLVLAGNVALESMGFKTFGFGFGRVDVWEPEEIFWGPEDTWLGDERYVSESSMSEGVGATEMGLIYVNPEGPRGSADPLAAAHFIRETFARMAMNDEETVALIAGGHTFGKTHGAGVADGHVGAEPEGAPLEAQGLGWLSTHESGKGKDAITSGLEVTWTDKPTEWSNRFFEILFGYEWELTTSPGGAKQWVAKTTDEIIPDAFDAAKKHKPTMLTTDLSLRVDPAY…
ACWT_3012_ATO82427.1	ATO82427.1	CP023298.1	Actinoplanes sp. SE50	typical catalase Group 5	MEARSPAEVIKDAVTAVTSEKKPDVPGAPGSGTPTVEEPATPREPLPPKPEQGQPDTRTPTGAPTGAPPTAYGQQGPYLTTAQGARLRDTDHSLKAGPRGPILLQDHHFREKITHFDHERIPERVVHARGAGAHGVFTSYGTAAALTQAGFLKEKGKQTDVFVRFSTVLGSRGSADTVRDTRGFATKFYTDEGTFDLVGNNMPVFFIQDAIKFPDIVHAAKWHPDREIPQAQSAHDTFWDFVSLHTEAQHHTMWNMSDRGIPRSYRTMEGFGVHTFRLVNDAGETVLVKFHWKPKLGVHSLVWEEAQITNGVDPDFHRRDLYDSIEAGAYPEWELGLQVFPDNPEETFAGIDLLDPTKIVPEELAPVQPVGKLVLNRTPTNFHAEVEQVAFHLGNLVPG…
ACWT_3021_ATO82436.1	ATO82436.1	CP023298.1	Actinoplanes sp. SE50	catalase-peroxidase Group 4	MSDIQDQKASGCPVAHDSATGHGGSESENPGIPSPQARTGGRPRGNRDWWPNQLDLSVLHAHSSKSNPLGEAFSYAAEFAKLDVEALKRDITEVLTTSQDWWPADFGHYGGLMIRLSWHAAGTYRIQDGRGGAGDGGQRFAPLNSWPDNANLDKARRLLWPVKQKYGQQISWADLLVLAGNVALESMGFQTFGFGFGRVDTWEPEEIFWGPEDAWLGDERYVSDKTMSEGVGATEMGLIYVNPEGPRGNADPAQAAHFIRETFARMAMNDEETVALIAGGHTFGKTHGAAVAADHVGPEPEGAPLEAQGLGWLSTHGSGRAGDTITSGLEVTWTDKPTQWSNRFFEILFGYEWELTTSPGGAKQWVAKDAEAIIPDAHDPAKKHKPTMLTTDLSLRVDP…
ACWT_8068_ATO87483.1	ATO87483.1	CP023298.1	Actinoplanes sp. SE50	catalase-peroxidase Group 4	MADELAAENRAERAGKCPVAHGTASHGGRGNRDWWPNALDLTVLHRNPVVGNPLGGDFDYAEAFSSLDLAAVKADITALLTDSQDWWPADFGHYGPLFIRMAWHSAGTYRTFDGRGGGGAGEQRFAPLNSWPDNGNLDKARLLLWPVKKKYGKNLSWADLMILAGNVALESMGFETFGFGGGRADVYEPEEVNWGSEDTWLGDERYSGDRELASPLGAVQMGLIYVNPEGPNGNPDPLASARDIRDTFGRMAMNDEETVALIAGGHTFGKTHGAGPASHVGPEPEAAPIEQLGSGWKSSYGTGVGGDAITSGLEGIWTPTPTRWDNTFFETLFKYEWTLSESPAGAKQWVPTSPDAEGTVPDAHDPAKRHVPTMLTSDLALRFDPIYEPISRRFYENPE…
ACX27_19505_ALF54537.1	ALF54537.1	CP012036.1	Nostoc piscinale CENA21	Mn-catalase Group 10	MFYHTKKLQYFKPPEKPDAVYAMKIQELIGGTFGEMTVMMQYLFQGWNCRGPAKYRDMLLDVGTEEIGHVEMLATMIAHLLDKAPVTVQEEGARDAVVGAVMGGTNPRDVIMNAAMNPQHAIVSGLGATPSDSVGYPWNGRFIVASGNLLADFRSNLHAESQGRLQAVRLYEMSNDPGVKDTLSFMIARDTMHQNLWLATIEDLESSGLETTPVPSSFPLELEKREFAYQFWNHSEGTESSEGRWAKGKSIDGKGEFQYVANPQPLGPEPQPPQPDPKLHGTPKTQTTQGNGASGGSAVDRTVIRS
ACZ75_15685_AKU22691.1	AKU22691.1	CP012201.1	Massilia sp. NR 4-1	typical catalase Group 7	MNKLLTTAAGAPVADNQNVQTAGPRGPMLLQDVWHLEKLAHFHREVIPERRMHAKGSGAFGTFAVTQDITRFSKAALFSQVGKKTDVFLRFSTVAGERGAADAERDIRGFAVKFYTEQGNWDVVGNNTPVFFMRDPLKFPDLNHAVKRDPRTNLRSAESNWDYWTLLPEALHQVTILMSERGIPASYRHMHGFGSHTFSFINAANERFWVKFHFQCQQGIRNLSDEEAQAVIARDRESSQRDLYESIERGDYPRWKLQVQVMPEADAAGYRFNPFDLTKVWPHQDYPLIEVGVLELNRNPDNYFADVEQAAFTPANVVPGISFSPDRMLQSRLFAYGDAQRYRLGVNHHQIPVNAPKCPFHSYHRDGAMRSDGNHGGAIGYEPNSKGEWQQQPSFAEPP…
ACZ75_26540_AKU24492.1	AKU24492.1	CP012201.1	Massilia sp. NR 4-1	typical catalase Group 7	MSKPITTASGIPVADNQNSASAGARGPLLLQDFHLIEKLQHFNRERIPERVVHAKGSGAYGTFTVTHDISRYTKAKLFAAVGKQAETFVRFSTVGGEKGSADTERDPRGFALRVYTEEGNWDLVGNNTPMFFIKDGIKFPDFIHTQKRDPQTNLKSATMMFDFWSKAPESLHQVTMLFSDRGTPDGYRHMDGFGSHTFSLINAAGERVYVKWHLKTQQGIQNLVAADAVRLAGEDPDYAQRDLFGAIERGDFPRWDVKLQVATEEQLAEWEARTGWNPFDLTKVWPHKDFPLIPVGVLELNRNPRNYHAEVEQAALSPANVVPGMGYSPDKMLQARLFAYHDAQLYRVGTNHQHLPVNAPRCPFHNQQRDGAMAIANGGSEQNYHTVEAGGSQPQGLGH…
ACZ76_15665_AKP34856.1	AKP34856.1	CP011975.1	Yersinia aleksiciae	typical catalase Group 7	MMSKKKGLTTAAGAPVVDNNNVVTAGRRGPMLLQDVWFLEKLAHFDREVIPERRMHAKGSGAYGTFTVTHDITQYTRAKIFSEVGKQTEMFVRFSTVAGERGAADAERDIRGFAMKYYTEEGNWDLVGNDTPVFYLRDPLKFPDLNHVVKRDPRTNLRNPTYKWDFFSQLPESLHQLTIDFSDRGLPKSYRHMHGFGSHTFSFINANNERFWVKFHFRCQQGIENLMDDEAEKLVGADRESSQRDLYEAIERGDFPRWNLQIQVMPEHEASQTPYNPFDLTKVWPHGDYPLIDVGFFELNRNPENYFAEVEQSSFNPANVVPGVSFSPDRMLQGRLFSYGDAARYRLGVNHHQIPVNSAKCPFHNYHRDGAMRVDGNSGNGATYEPNSFGLFQEQPDFS…
AD006_03815_ALL74667.1	ALL74667.1	CP012181.1	Pseudonocardia sp. EC080610-09	typical catalase Group 6	MTSSQPKPTTTDSGSPVASDEHSLTIGPDGPILLNDHYLIEQMANFNRERIPERQPHAKGGGAFLRFETTEDVSRYTKASFLQPGAETRGVIRFSTVAGERGSPDTWRDPRGFSLKLWTDEGNWDMVGNNTPVFFVRDPMKFQHFIRSQKRRVSNNLRDHDMQWDFWTLSPESAHQVTWLMGDRGVPKTWRHMNGYSSHTYSWINADGEMFWVKYHFKTDQGVECLTQDEADHLAGADADYHQRDLYDQIEAGNHPSWTLYVQVMPFADATTYRFNPFDLTKVWPHADYPLIKVGTLTLDRNVEDYHAEMEQAAFEPNNLVPGTGLSPDRMLLARGFSYADAHRARLGVNYKQIPVNAPRSEVNNYAKDGSMRITNSRDPIYAPNSYGGPAADPKRVAE…
AD006_10725_ALL75665.1	ALL75665.1	CP012181.1	Pseudonocardia sp. EC080610-09	catalase-peroxidase Group 4	MSDEKVTVEGELNREEDGGCPVAHGRIPHPTEGGGNIDWWPNQLNLKVLRKHQPASDPFHGEFDYAAAFATVDLDELARDVDAVITTSQDWWPADHGSYAGFFIRMAWHSAGTYRTFDGRGGAGAGMQRFAPLNSWPDNGNLDKARRLLWPVKQKYGRTVSWADLMIFAGNRALEVSGFTTFGFAGGRADVWEPDEDVYWGAETTWLGNEARYGGSTDVAHRELEKPLGASHMGLIYVNPEGPDANHDPVAAARDIRETFGRMAMNDEETVALIAGGHTLGKTHGAANPDENGNVGPEPEGADITEQGLGWKQSFGSGKGRDAITSGLEVTWTRTPNRWSHDFFDFLFKYEWEVEKSPAGAWQYVAKDAEAIIPDPEEGYPARKPTMLTTDLSLRFDPI…
AD006_20990_ALL78958.1	ALL78958.1	CP012181.1	Pseudonocardia sp. EC080610-09	catalase-peroxidase Group 4	MDSAREQAGSGRAGGWWPHRLDLTPLRRHRPADAGYAERFTSIDLDELARDIDEVLTTSQDWWPADFGHYGPLVLRMAWHSAGTYRTGDGRGGAGAGMLRFAPLDSWPDNRNLDKARRLLWPVKQKYGRRISWADLMIFAGNRALESMGFTTFGFGGGRPEVWGPDETYWGPERTWLAEERYRGLHELDEPLAASAMGLVYVDPQGPATNPDPVLAARDIRQTFRRMGLDDEETVALIAGGHTVGKTHGPVDPNVTGGPEPQAAPLSAQGLGWLGGHGTGAGADTVTSGQDGTWTRTPVTWDHTFFDTLFMSGWDIELSPAGQWQWVPSDGAGEGTVPDAVDPDVTHRPVMLTTDLALREDPAFEAISRRFLEEPDRFEDAFARAWFKLTHIDMGPVGR…
AD017_00570_ALL84131.1	ALL84131.1	CP012184.1	Pseudonocardia sp. EC080619-01	catalase-peroxidase Group 4	MDSAREQAGSGRAGGWWPHRLDLTPLRRHRPADAGYAERFTSIDLDELARDIDEVLTTSQDWWPADFGHYGPLVLRMAWHSAGTYRTGDGRGGAGAGMLRFAPLDSWPDNRNLDKARRLLWPVKQKYGRRISWADLMIFAGNRALESMGFTTFGFGGGRPEVWGPDETYWGPERTWLAEERYRGLHELDEPLAASAMGLVYVDPQGPATNPDPVLAARDIRQTFRRMGLDDEETVALIAGGHTVGKTHGPVDPNVTGGPEPQAAPLSAQGLGWLGGHGTGAGADTVTSGQDGTWTRTPVTWDHTFFDTLFMSGWDIELSPAGQWQWVPSDGAGEGTVPDAVDPDVTHRPVMLTTDLALREDPAFEAISRRFLEEPDRFEDAFARAWFKLTHIDMGPVGR…
AD017_11635_ALL81689.1	ALL81689.1	CP012184.1	Pseudonocardia sp. EC080619-01	typical catalase Group 6	MTSSQPKPTTTDSGSPVASDEHSLTIGPDGPILLNDHYLIEQMANFNRERIPERQPHAKGGGAFLRFETTEDVSRYTKASFLQPGAETRGVIRFSTVAGERGSPDTWRDPRGFSLKLWTDEGNWDMVGNNTPVFFVRDPMKFQHFIRSQKRRVSNNLRDHDMQWDFWTLSPESAHQVTWLMGDRGVPKTWRHMNGYSSHTYSWINADGEMFWVKYHFKTDQGVECLTQDEADHLAGADADYHQRDLYDQIEAGNHPSWTLYVQVMPFADATTYRFNPFDLTKVWPHADYPLIKVGTLTLDRNVEDYHAEMEQAAFEPNNLVPGTGLSPDRMLLARGFSYADAHRARLGVNYKQIPVNAPRSEVNNYAKDGSMRITNSRDPIYAPNSYGGPAADPKRVAE…
AD017_18555_ALL82693.1	ALL82693.1	CP012184.1	Pseudonocardia sp. EC080619-01	catalase-peroxidase Group 4	MSDEKVTVEGELNREEDGGCPVAHGRIPHPTEGGGNIDWWPNQLNLKVLRKHQPASDPFHGEFDYAAAFATVDLDELARDVDAVITTSQDWWPADHGSYAGFFIRMAWHSAGTYRTFDGRGGAGAGMQRFAPLNSWPDNGNLDKARRLLWPVKQKYGRTVSWADLMIFAGNRALEVSGFTTFGFAGGRADVWEPDEDVYWGAETTWLGNEARYGGSTDVAHRELEKPLGASHMGLIYVNPEGPDANHDPVAAARDIRETFGRMAMNDEETVALIAGGHTLGKTHGAANPDENGNVGPEPEGADITEQGLGWKQSFGSGKGRDAITSGLEVTWTRTPNRWSHDFFDFLFKYEWEVEKSPAGAWQYVAKDAEAIIPDPEEGYPARKPTMLTTDLSLRFDPI…
AD997_08860_ATZ11564.1	ATZ11564.1	CP024970.1	Erwinia amylovora	typical catalase Group 6	MSDDVRKPTTTDAGIPVASDEHSLTVGPDGPIVLHDHYLIEQMANFNRERIPERQPHAKGSGAFGHFEVTEDVSQFTKAALFQPGVKTDVVMRFSTVAGERGSPDTWRDPRGFSIKFYTSEGNYDMVGNNTPVFFIRDPMKFQHFIRSQKRRADNNLRDNDMQWDFWTLSPESAHQVTWLMGDRGIPKSWRHMNGYSSHTYMWVNAQGEKFWVKYHFKTDQGIEFLAQEDADTLAGQDGDYHTRDLFEAIKAGNSPSWTLHMQIMPFADAETYRYNPFDLTKVWPHGDYPLIKVGKLVLDRNPTDNFAQIEQVAFEPNNLVPGIGLSPDKMLMGRIFAYADAHRARLGVNYKQIPVNAPKSPVNSYSKDGAMRIDLASDPVYAPNSKGGPAADGERYPT…
AD997_10610_ATZ11885.1	ATZ11885.1	CP024970.1	Erwinia amylovora	catalase-peroxidase Group 4	MSTQNTNDNAPAGKCPFHGQNEEKSVLARGAGGGTSHRDWWPDQLRVDLLNQHSQRSNPLNVNFNYRDEFRKLDYSQLKADLKSLLDDSQEWWPADWGSYIGLFIRMAWHSAGTYRTVDGRGGSGRGQQRFAPLNAWPDNVSLDKARRLLWPVKQKYGQKISWADLYILAGNVALENSGFRTFGFAAGREDVWEPDLDINWGDEKEWLTHRHPESLAHAPLGATEMGLIYVNPEGPEASGNPASAAPAIRATFGNMGMDDEEIVALIAGGHTLGKTHGAGEARHVGVDPEAAPLESQGLGWTSSYGSGSGADAITSGLEVIWTQTPTQWSNYFFENLFKYEWVQTHSPGGAIQFEAQDAEASIPDPFDANKKRKPAMLVTDLTLRFDPDFEKISRRFLQ…
ADH65_01975_ASU17354.1	ASU17354.1	CP022722.1	[Clostridium] innocuum	Mn-catalase Group 02	MFEHKKKLLHPVKVERPNPQYAVLMQEQLGGCNGEVKAAMQYLSQSFRAKDPVFKDLFLDIGTEELSHMEMVAETINLLNGGDVDYKKVDAGEIETMVTFGLNPALVNSSGNPWTADYVTVTGDLAADLLADIASEQRAKVVYEYLYRQIDDKYVKETIMFLLEREEAHNALFCEALNKITDDGSNKSFGMSEDSRLYFDLSKPGRYFDDPDPKAPKMANAKDSKSTKSKSKKK
ADJ73_01410_AKT50316.1	AKT50316.1	CP012070.1	Arsenicicoccus sp. oral taxon 190	typical catalase Group 5	MPNRLPDKPSLEEPTTPQPPLPPADDTRAPQVRTATGYDTGAAPDARAQQGEYLTTAQGVRLPDSDHSLKAGDRGPTLLQDHHLREKITHFDHERIPERVVHARGTGAHGVFKAYGSAEKVSRAAFLKKDVETPVFVRFSTVLGSRGSADTPRDTRGFAVKFYTEEGNFDLVGNNIPVFFIQDGIKFPDVVHAAKPEPDREIPQAASAHDTFWDFVSLHTEAQHHTLWNMSDRALPLSLRTMEGFGVHTFRLVDEDGKTVLIKWHWKPVAGVHSTLWEEAQLIMGGDPDFQRRDLADAIEAGHYPQWELGIQVMPDTEDQTFEGIDLLDPTKLVPEELAPVQPVGIMTLDANPTNFFAEVEQVMFNPGHLVPGIDVVNDALLQARLFSYVDTQITRLGG…
ADP71_27370_QJQ52408.1	QJQ52408.1	CP019644.2	Vitreoscilla sp. C1	catalase-peroxidase Group 3	MTDHSKANGCPFQNGAQTTQAAPDNAFWWPNALNLDILSQHDKKTNPLDPDFNYAQAFQSLDLEAIKNDLRELINSSQDWWPSDYGSYIGMFVRTAWHLAGSYRKQDGRGGANTGNQRFAPLNSWPDNVNTDKGRRLLWPIKKKYGNKISWGDLIVLAGTVAYEEAGLKTYGFAGGREDIWHPEKDIYWGTERKWLDETKNRYDDVDNRDTLENPLAAVQMGLIYVNPEGVDGVQDPLRTAQDMRVTFDRMGMDDEETVALTAGGHTVGKCHGNGKAENLGADVEGADVEFQGLGWHNPEGSGNGSNTMVSGLEGAWTTHPTKWDNGFFHLLLSYEWEKTLSPAGAKQWEPVNIKEEDKPVDAHNPDIRRNPMMTDADMALKIDPEYRKISERFHQDPA…
AEB_P0045_BBC70913.1	BBC70913.1	AP018498.1	Altererythrobacter sp. B11	typical catalase Group 5	MASNKTKADYPGGDKGFSFERGEGGETHQQASDTGALDEAAALTTNQGIRVSDNQNSLKAGTRGPSLLEDFVLREKIFHFDHERIPERIVHARGSAAHGVFTCTDPIPELTRASLFAEEGKQTPVFARFSTVAGGAGSVDTPRDVRGFAVKFYTDEGNWDLVGNNIPVFFIQDAIKFPDLIHSVKMEADRGFPQAASAHDTFWDFISLMPESMHMIMWAMSDRAIPRSLRMIEGFGIHTFRLVNAEGADSFCKFIWKPRLGVQSTCWDEAVKIAGADPDYHRRDLFEAIDMGDFPAWDLFVQVFDEEFAAAQPYDVLDSTKLIPEEVLPPRKVGTMELNRNPDNFFAETEQSAFCPANIVPGIDFSNDPLLQGRLFSYLDTQLKRLGSTNFHQLPINAP…
AELL_2140_AXX95780.1	AXX95780.1	CP032097.1	Arcobacter ellisii	catalase-peroxidase Group 3	MGGKCPITGLGGNPTTSNKGTYNKDWWPNQLNLKILSQQSNKVNPLGDNFNYAEEFKKLDYDALKKDLTDLMTNSQDWWPADYGHYGPLFIRMAWHSAGTYRTGDGRGGAATGNQRLAPLNSWPDNANLDKARRLLWPIKQKYGNKISWADLMILAGNVALESMGFKTFGFAGGRVDVWEPEEDIYWGNEKEWLATSDKENSRYSGDRDLENPLAAVQMGLIYVNPEGPDGEPNILASGKDIRETFARMAMGDKETVALVAGGHTFGKCHGAGSASNVGPEPEAEGIIAQGLGWLSKFLSGKGDDTITSGIEGSWTANPTRWDNEYFDILFGYEWNLEKSPAGAWQWTPINPKEEHLAPSAHNPNKKVKTIMTTADMAMRMDPIYGPISKRFHENPEEF…
AEM38_12035_AMS31031.1	AMS31031.1	CP012156.1	Hyphomonadaceae bacterium UKL13-1	catalase-peroxidase Group 3	METQGKCPVMHGGGQPAKVGTQSNRDWWPNQLNLKMLHQHTSLSSPMAHGFDYAAAFQALDFDALKADVMALMTQSQDWWPADYGHYGPFFIRMAWHSAGTYRTGDGRGGAGAGTLRFAPLNSWPDNGNLDKARRLLWPIKQKYGSAISWADLMILAGNCALESMGFETFGFAGGRADVWEPEEDIYWGKEKGWLEDQRYAGERDLEHPLAAVQMGLIYVNPEGPNGVPDPLASAFDIRDTFGRMAMNDEETVALIAGGHTFGKAHGAADPSKYVGPEPEGATLEEQGFGWANSFGSGKGVDTITSGLEGAWTTNPIKWDNNYFDNLFGFEWVQSKSPAGATQFVPAEADAHGLVPDAHDPNKRHAPVMFTTDLALRFDPIYGPISKRFHENPDQFADA…
AEM51_07380_AMS26866.1	AMS26866.1	CP012155.1	Bacteroidetes bacterium UKL13-3	catalase-peroxidase Group 4	MKQLLLPAMCLFSVAVFAQEKKAECPMGHGSSAKTETTERREAAMKANTNKEWWPNKLNVEVLRQNSEKTNPMDKNFDYIKEFKTLDYVALKKDIEAVLTQSQDWWPADFGNYGPFFIRMAWHSAGTYRSADGRGGSRAGQQRFAPLNSWPDNGNLDKARRLLWPVKQKYGSKISWADLMVLAGNVALENMGFKTYGFSGGRVDVWEPENDVYWGSEKKWLDDNRYAEGRKLENPLAAVQMGLIYVNPEGPNGKPDPLAAAVDIRETFKRMGMNDEETVALIAGGHTFGKTHGKGPASHVGPEPEAAPIEEQGFGWKSSYGTGKGKDAITSGLEVTWTSTPTKWGNGYFRILLNNEWELTKSPAGAHQWVAKNATANIPDAFDPTKKQLPTMLTTDLSL…
AEP_01590_ARV18534.1	ARV18534.1	CP015698.1	Curvibacter sp. AEP1-3	catalase-peroxidase Group 3	MVRMAWHSAGTYRTADGRGGAGSGSQRFAPLNSWPDNGNLDKARRLLWPIKQKYGRKLSWADLMILAGNVALESMGFKTFGFAGGREDIWEPEQDIYWGAEKAWLATSDKENSRYSGDRKLESPLAAVQMGLIYVNPEGPDGKPDPVASGRDVRETFARMAMNDEETVALVAGGHTFGKAHGAGDPTLVGPEPEAAGIEEQGFGWINKLGSGKGVHTTTSGIEGAWKPNPTTWDNGYFDMLFGYEWALTKSPAGAHQWVAQNVKPEHMIPDAHDPSKKHPPMMTTADMSLRMDPAYERISRRFHQNPAEFADAFARAWFKLTHRDMGPRARYLGKLVPSEVLSWQDPIPAVDHALVDAADVAALKAQVLASGLSISELVSTAWASASTFRGSDKRGGAN…
AERYTH_03935_ALX03910.1	ALX03910.1	CP011502.1	Aeromicrobium erythreum	typical catalase Group 6	MATAPTPEAQKGSTTETGAPAVSDRNSLTLGADGPILLHDRHLLEQMAHFNRERVPERNVHAKGSGAFGTFVTTEDVSAYTKAALFQPGVETEMLARFSTVAGEHGSPDTWRDPRGFALKFYTTEGNYNLVGNNTPVFFVRDTMKFQHFIRSQKRRGANGLRDNHMQWDFWSLNPESAHQVTYLMGDRGIPRSYRHMNGYGSHTFLWINAAGDKHWVKYHFHSQQGVQGLTGEDADRIAGHDADFHRRDLFEAIEAGDYPSWRLSVQLMPYEDAKTYRLNPFDLTKVWPHEDYPLVEVGTMTLDRNPQNFFAEIEQAAFEPSAVVPGIGFSPDKMLLGRVFSYSDTQRYRIGPNYHQLPVNRPKNVQHHNTYTFDGPMAYDHSGDQPVYAPNSEGRGYS…
AERYTH_05235_ALX04145.1	ALX04145.1	CP011502.1	Aeromicrobium erythreum	Mn-catalase Group 10	MFTHQKPLQFTARPDAPDPAFARRFQEVLGGKWGEMTVAMQYLYQGWNCRLPGKYKDMLMSIGTEELSHVEMITTMIDQLLDKAPPMAPDDTTGSTQASEFGQQNPQQTIVNGGGAYPHDSNGVPWSGAFVTASGNLMADFHLNVTAEMQGRLQVARLFHMTDDQGVKDLIRFLVTRDHMHQMQWLSAIEELKADGLDGVPTPEAFPLEEEFDEFSHTFIQASDGEAATEGSWASGPAPDGRGDFRSALIEAHGQIPELAPGDPRLYGTQELQETKGLIDKAKDALS
AERYTH_11895_ALX05351.1	ALX05351.1	CP011502.1	Aeromicrobium erythreum	catalase-peroxidase Group 4	MNDPLEAKGAPEGQCPVAHDSLPYPTRQDANKVWWPEGLNLKILAKNPSVANPLGDDFDYAAAFESLDLAEVKRDIEQVLTTSQDWWPADFGHYGGLMIRMAWHSAGTYRVHDGRGGAGAGQQRFAPLNSWPDNGNLDKARRLLWPVKKKYGKNLSWADLIVLTGNVALESMGFETFGFAGGREDVWEPDADVYWGPETEWLGDERYSGDRELERPLAAVQMGLIYVNPEGPNGEPDPLAAARDIRETFGRMAMNDEETVALIAGGHTLGKTHGAADPEKYVGAEPEGASLEEQGLGWKNSFGAGHGNDTITSGLEVTWTRTPVQWSNDYFELLFGYEWELTKSPAGAWQFEAKDAEAIIPDAHGGPNRKPRMLVTDVALRVDPAYEQISRRYKDDPAA…
AFAEC_0723_QKF72905.1	QKF72905.1	CP053837.1	Aliiarcobacter faecis	typical catalase Group 7	MKKIMTTTGGNPIADNQNSITAGERGPVLLQDYQLIQKLAHQNRERIPERVVHAKGSGAFGELEITEDISKYTKAKVLQKGEKTKLLLRISTVAGERGAADAERDVRGFALKFYTKEGNWDLVGNNTPVFFVRDAIKFPDFIHTQKRDPQSNLRSNTAMWDFWSLSPESLHQVTILMSDRGLPKSLRHINGYGSHTYSLINSNNERFWVKFHFKTLQGIETITNKEAEAIVGKDRESNQRDLFTNIESGNFPKWSFEIQIMTEEQAKNCAFNPFDLTKVWPHGDYPMIKVGTMTLNENPKNYFQQVEQAAFSPSNIVPGISFSPDKMLQARIFSYPDAQRYRVGTHYEMLPVNKPIVEVNTYNLDGSMNFQVKEPTKAFYEPNSFDGPVEDASFLEPDL…
AFB00_09425_ANY06476.1	ANY06476.1	CP013854.1	Pseudonocardia sp. HH130630-07	typical catalase Group 6	MTSSQPKPTTTDSGSPVASDEHSLTIGPDGPLLLNDHYLIEQMANFNRERIPERQPHAKGGGAFCRFEVTGDVSRFTKAGFLQPGAENRGVIRFSTVAGERGSPDTWRDPRGFSLKLWTDEGTWDMVGNNTPVFFVRDPMKFQHFIRSQKRRVANNLRDHDMQWDFWTLSPESAHQVTWLMGDRGIPRSWRHMNGYSSHTYSWVNSAGELFWVKYHFKSDQGVECLTQDEADTLAGSDPDYHQADLYNEIEAGNHPSWTLHVQVMPFADAKTYRYNPFDLTKIWPHADYPLHEVGKLTLDRNVTDYHAEMEQAAFEPNNLVPGTGLSPDKMLLARGFSYADAHRARLGVNYKQIPVNAPKAEVNNYQKDGAMRITNTRDPIYAPNSYGGPAADPKRVAE…
AFB00_16615_ANY07650.1	ANY07650.1	CP013854.1	Pseudonocardia sp. HH130630-07	catalase-peroxidase Group 4	MSDEHPTVESQMNREEDGGCPVAHGGMPHPTEGGGNIDWWPNQLNLKILRKHQVAADPFHGEFDYAAAFAAVDLGELARDVDAVITTSQDWWPADHGSYAGLFIRMAWHSAGTYRTFDGRGGAGAGMQRFAPLNSWPDNGNLDKARRLLWPVKQKYGRSVSWADLLIFAGNRALEVSGFTTFGFAGGRADVWEPDEDVYWGAETTWLGNEARYGGSTDLAHRELEKPLGAAHMGLIYVNPEGPDASADPVAAARDIRETFGRMAMNDEETVALIAGGHTLGKTHGAANPDENGNVGPEPEGADITEQGLGWKQNFGSGKGRDAITSGLEVVWTRTPNRWSHDFFDFLFRYEWELETSPAGAKQYVAKDAEAIIPDPEEGFPARKPTMLTTDLALRFDPI…
AFERRI_20154_SMH65372.1	SMH65372.1	LT841305.1	Acidithiobacillus ferrivorans	typical catalase Group 5	MSKANTPEDKIEVGAGGEWHQVASGEHPPLTTNQGLIIADNQNSLKANPYGPTLLEDFILREKVFHFDHERIPERVVHARGTGMHGYFELTHSLAKYTTAKILTEVGEKTELFTRISTVAGGSGSVDTPRDVRGFAVKFYTKEGNWDLVGNNIPVFFIQDAIKFPDLIHAAKMEPDRAFPQAATAHDTFWDYISLTPEAMHMVMWIMSDRAIPRSLRMIEGFGIHSYRLLNVAGESTFVKFHWRPKLGLQSTIWDETVKISGADQDFHRRDMFEAIEAGNFPEWEFAVQLFTAAEAEKFPFDHLDPTKLIPEELVPLQIIGRMVLDRWPNNFFAETEQVAYCLSNIVPGIDFSNDPLLQGRLFSYLDTQISRLGSPNFNQIPVNAPKCPFANLQRDGHM…
AFERRI_20309_SMH65527.1	SMH65527.1	LT841305.1	Acidithiobacillus ferrivorans	typical catalase Group 7	MSKCPVMTTSAGVPVADNENSLSAGPRGPLLMEDYQLFERMAHFNRERVPERVVHAKGAGAYGQFEVTGDISRFTRAHLFSAIGNRCDLFLRFSHVAGEQGYADTVRDPRGFAIKFYTEEGNWDLVGNNTPVFFIRDPLKFQDFIHSQKRRPDTGLRDNTMQWDWWSLSPESLHQVTILFSDRGIPASYRNMNGYGSHTFSVWNDQGERYWVKWHLKTMQGIKTLRAEDAARIAGEDPDFHRRDLHAAIARGEFPRWQVQIQIMPEKDAETYGIHPFDLTKVWPHKDYPPQEVGILTLNRNPENFFAEVEQAAFEPGNLPPGLGVSPDKVLQARLLSYADTHRYRIGINYASLPVNQPHCPVHTYHRDGHMRFDGNSGGAVNYEPNSFSGPVQAPEYRA…
AFK25_07550_AKS38409.1	AKS38409.1	CP012152.1	Anoxybacillus gonensis	Mn-catalase Group 07	MFTRINKLQIELPKSTYADANAAAAVQELLGGKFGEMSTLNNYLFQSFNFREKKKLKPFYDLVASITAEELGHVELVTTAINLCLTGTTHEGAPDITPMQNGVDQRNTYHFIATAQTALPGDSMGKSWSGDYVFNSGNLVLDLLHNFFLECGARTHKMRVYEMTDHPVAREMIGYLLVRGGVHVIAYAKALQIVTGVDVTKMLPIPNLSNDKFDAAKKYEAQGWHRRLYTFSEHDFQDVKQIWKGTHPLDGGQLEVIQGTPAGAPIPDLEAVEETFAPGISYEDFLEIAKRLQKSAGL
AFK25_08500_AKS38595.1	AKS38595.1	CP012152.1	Anoxybacillus gonensis	catalase-peroxidase Group 3	MENKCPFHGSVTNHTSNKTTNKDWWPNQLNVSILHQHDRKTNPHDETFDYAEQFQTLDYWALKEDLRKLMTTSQDWWPADYGHYGPLFIRMAWHSAGTYRIGDGRGGASTGTQRFAPLNSWPDNANLDKARRLLWPIKQKYGNKISWADLIVLAGNVAIESMGGKTIGFGAGREDVWHPEEDIYWGAEKEWLASERYTGDRELENPLAAVQMGLIYVNPEGPDGNPDPLAAARDIRETFKRMGMSDEETVALIAGGHTFGKAHGAGAASHVGPEPEAAPIEAQGLGWLSSYGKGNGRDTITSGLEGAWTPTPTQWDNSYLQLLFEYEWKLTKSPAGAYQWEAVNIKEEHLAPDVEDANVKVPPMMLTTDLALRFDPIYEKIARRFYEHPEEFADAFARA…
AFK25_09105_AKS38715.1	AKS38715.1	CP012152.1	Anoxybacillus gonensis	Mn-catalase Group 01	MWIYEKKLQYPVRVSTCNPKLAKYLIEQYGGADGELAAALRYLNQRYTIPDKVVGLLTDIGTEEFAHLEMIATMIYKLTKDATPEQLKEAGLGEHYVNHSHALFYHNAGGAPWTATYIQAKGDPIADLYEDIAAEEKARATYQWIIDMSDDPDLNDSLRFLREREIIHAQRFREAVEILKEERDRKKIF
AFK62_08350_ALB62512.1	ALB62512.1	CP012264.1	Cronobacter condimenti 1330	typical catalase Group 5	MSNDEKRPNHQAPFHDAQSSKPGMGSLAPADGSHRPSPAPTPPGEQPTAPGSVKAPQVSNDKLSALETFRKGGENEALTTNQGVRIADDQNSLRAGTRGPTLLEDFILREKITHFDHERIPERIVHARGSAAHGYFQPYKSLSDITKAAFLSDPQKITPVFVRFSTVQGNAGSADTVRDIRGFATKFYTEEGIFDLVGNNTPVFFIQDAHKFPDFVHAVKPEPHWAIPQGQSAHDTFWDYVSLQPETLHNVMWAMSDRGIPRSYRTMEGFGIHTFRFINAEGKGTFVRFHWKPVAGKASLLWDESQKLTGRDPDFHRRDLWEAIEAGDYPEYELGVQLIPEEDEFKFDFDLLDATKLIPEELVPVQLVGKMVLNRNPDNFFAENEQAAFHPGHIVPGLD…
AFK62_09490_ALB62720.1	ALB62720.1	CP012264.1	Cronobacter condimenti 1330	Mn-catalase Group 03	MFRHVKQLQYTVRVAGPNPGLANLLLEQFGGPQGELAAATRYFTQGLGDEDPARKEMLMDIATEELSHLEIIGSLVGMLNKGAKGDLAEATESEGELYRSITGAGNDSHLTQVLYGGGPPLTNSAGVPWTAAYIDTIGEITADLRSNIAAEARAKIIYERLINLTDDPGVKDALGFLMTREVAHMLSFEKALYSIRNNFPPGKLPPVEQYTNVYYNMSKGDDLRGSWNSDENFEYVADPQPAVNGGDGMIDIQLSPDQQASVLNMAQRLQSDPGINPVTGAEMGASVPPVERQSKKPFEKK
AFK62_16415_ALB63986.1	ALB63986.1	CP012264.1	Cronobacter condimenti 1330	catalase-peroxidase Group 4	MSTPTETHNTLSAGKCPFHQGNHNQSAGGGTASRDWWPNQLRVELLNQHSERTNPLGEAFNYRNAFSELDYAALKGDLKALLTDSQPWWPADWGSYTGLFIRMAWHSAGTYRATDGRGGAGRGQQRFAPLNSWPDNVSLDKARRLLWPVKQKYGQKISWADLFILAGNVALENSGFRTFGFGAGREDVWEPDMDVNWGDEKNWLEHRHPESLAQAPLGATEMGLIYVNPEGPNHSGDPASAAPAIRATFGNMGMNDEETVALIAGGHTLGKTHGAGAASHVGVDPEAAPIEAQGLGWTSNFGSGAGADAITSGLEVTWTQTPTQWSNYFFENLFKYEWVQTRSPAGAIQFEAVDAPEIIPDPFDPSKKRKPTMLVTDLTLRFDPEYEKISRRFLNDPQA…
AFK63_02085_ALB69459.1	ALB69459.1	CP012268.1	Cronobacter muytjensii ATCC 51329	catalase-peroxidase Group 4	MSTPSEQHNTLSAGKCPFHQGNNNQSAGGGTASRDWWPNQLRVELLSQHSNRTNPLGEDFNYRKAFSELDYAALKGDLKALLTDSQPWWPADWGSYTGLFIRMAWHSAGTYRSADGRGGAGRGQQRFAPLNAWPDNVSLDKARRLLWPVKQKYGQKISWADLFILAGNVALENSGFRTFGFGAGREDVWEPDMDVNWGDEKNWLEHRHPESLAQAPLGATEMGLIYVNPEGPNHSGDPASAAPAIRATFGNMGMNDEETVALIAGGHTLGKTHGAGAASHVGVDPEAAPIEAQGLGWTSSFGSGAGADAITSGLEVTWTQTPTQWSNYFFENLFKYEWVQTRSPAGAIQFEAVDAPEIIPDPFDPSKKRKPTMLVTDLTLRFDPEFEKISRRFLNDPQA…
AFK63_08970_ALB70733.1	ALB70733.1	CP012268.1	Cronobacter muytjensii ATCC 51329	Mn-catalase Group 03	MFRHVKQLQYTVRVAEPNPGLANLLLEQFGGPQGELAAATRYFTQGLGDEDPARKEMLMDIATEELSHLEIIGSLVGMLNKGAKGDLAEATETEGELYRSITGAGNDSHLTQVLYGGGPPLTNSAGVPWTAAYIDTIGEITADLRSNIAAEARAKIIYERLINLTDDPGVKDALGFLMTREVAHMLSFEKALYSIRNNFPPGKLPPVEQYTNVYYNMSKGDDLRGSWNSDENFEYVADPQPAVNGGDGMIDIQLGPDQQASVLNMAQRLQSDPSINPVTGAEMGASVPPVERQVKKPGEKK
AFK63_10080_ALB70943.1	ALB70943.1	CP012268.1	Cronobacter muytjensii ATCC 51329	Mn-catalase Group 09	MFHHSSKLQYPVRVEKPDPEFAMLLQQAIGGVEGEIRVAMQYFFQAMGARGDVRIKDLLISTATEELAHIEMLAYAVAINLEGAPLSYQEASAKDPVVNAILGGMNPRHILSSGLAALPENANGKPFDMSHIYASGNVAADMLANVTAEASGRVLATRLYNLTEDKGMKDFLSFLIARDTMHQQQWLAVLEEMGGLSASLPIPNSFPQESEASEHSYYCLNTSLDKPLPKGRWSEGPAYDGKGQFTAKEEPEILGQEPVLGNARPGSGAQNEQILGK
AFK63_10145_ALB70955.1	ALB70955.1	CP012268.1	Cronobacter muytjensii ATCC 51329	typical catalase Group 5	MSNDEKRPNHEAPFHDARSSQPGMGSLAPGDGSHRPAPAPTPPGEQPTAPGSLKAPQVTNDKLGALETFRKGGENEALTTNQGVRIADDQNSLRAGTRGPTQLEDFILREKITHFDHERIPERIVHARGSAAHGYFQPYKSLSDITKAAFLSDPQKITPVFVRFSTVQGGAGSADTVRDIRGFATKFYTEEGIFDLVGNNTPVFFIQDAHKFPDFVHAVKPEPHWAVPQGQSAHDTFWDYVSLQPETLHNVMWAMSDRGIPRSYRTMEGFGIHTFRFINAEGKGTFVRFHWKPVAGKASLIWDESQKLTGRDPDFHRRDLWEAIEAGDYPEYELGVQLIPEDDEFKFDFDLLDATKLIPEELVPVQLVGKMVLNRNPDNFFAENEQAAFHPGHIVPGLD…
AFK65_08305_ALB54662.1	ALB54662.1	CP012257.1	Cronobacter universalis NCTC 9529	typical catalase Group 5	MSNDEKRPNHEAPFHDARSSQPGMGSLAPADGSHRPSPAPTPPGEQPTAPGSLKAPQVTNDKLGALETFRKGGENEALTTNQGVRIADDQNSLRAGTRGPTLLEDFILREKITHFDHERIPERIVHARGSAAHGYFQPYKSLSDITKAAFLSDPQKITPVFVRFSTVQGGAGSADTVRDIRGFATKFYTEEGIFDLVGNNTPVFFIQDAHKFPDFVHAVKPEPHWAIPQGQSAHDTFWDYVSLQPETLHNVMWAMSDRGIPRSYRTMEGFGIHTFRFINAEGKGTFVRFHWKPVAGKASLIWDESQKLTGRDPDFHRRDLWEAIEAGDYPEYELGVQLIPEEDEFKFDFDLLDATKLIPEELVPVQLVGKMVLNRNPDNFFAENEQAAFHPGHIVPGLD…
AFK65_09935_ALB54966.1	ALB54966.1	CP012257.1	Cronobacter universalis NCTC 9529	Mn-catalase Group 03	MFRHVKQLQYTVRVAAPNPGLANLLLEQFGGPQGELAAATRYFTQGLGDEDPARKEMLMDIATEELSHLEIIGSLVGMLNKGAKGDLAEATEAEGEIYRSITGAGNDSHLTQVLYGGGPPLTNSAGVPWTAAYIDTIGEVTADLRSNIAAEARAKIIYERLINLTDDPGVKDALGFLMTREVAHMLSFEKALYSIRNNFPPGKLPPVEQYTNVYYNMSKGDDLRGSWNSDENFEYVADPQPAVNGGDGMIDIQLSPEQQASVLTMAQRLQSDPGINPVTGAEMGASVPPVERQSKKPVEKK
AFK65_16190_ALB56126.1	ALB56126.1	CP012257.1	Cronobacter universalis NCTC 9529	catalase-peroxidase Group 4	MSTPSEQHNTLSAGKCPFHQGNSNQSAGGGTASRDWWPNQLRVELLAQHSNRTNPLGEDFNYRKAFSELDYAALKGDLKALLTDSQPWWPADWGSYTGLFIRMAWHSAGTYRSADGRGGAGRGQQRFAPLNSWPDNVSLDKARRLLWPVKQKYGQKISWADLFILAGNVALENSGFRTFGFGAGREDVWEPDMDVNWGDEKNWLEHRHPESLAQAPLGATEMGLIYVNPEGPNHSGDPASAAPAIRATFGNMGMNDEETVALIAGGHTLGKTHGAAAANHVGVDPEAAPIEAQGLGWHSSFGSGAGADAITSGLEVTWTQTPTQWSNYFFENLFKYEWVQTRSPAGAIQFEAVDAPEIIPDPFDPSKKRKPTMLVTDLTLRFDPEFEKISRRFLNDPQA…
AFK67_08480_ALB66516.1	ALB66516.1	CP012266.1	Cronobacter dublinensis subsp. dublinensis LMG 23823	typical catalase Group 5	MSNDEKRPNHEAPFHDARSSQPGMGSLAPDDGSHRPSPAPTPPGEQPTAPGSLKAPQVTNDKLGALETFRKGGEHEALTTNQGVRIADDQNSLRAGTRGPTLLEDFILREKITHFDHERIPERIVHARGSAAHGYFQPYKSLSDITKAAFLSDPQKITPVFVRFSTVQGGAGSADTVRDIRGFATKFYTEEGIFDLVGNNTPVFFIQDAHKFPDFVHAVKPEPHWAVPQGQSAHDTFWDYVSLQPETLHNVMWAMSDRGIPRSYRTMEGFGIHTFRFINAEGKGTFVRFHWKPVAGKASLIWDESQKLTGRDPDFHRRDLWESIEAGDYPEYELGVQLIPEEDEFKFDFDLLDATKLIPEELVPVQLVGKMVLNRNPDNFFAENEQAAFHPGHIVPGLD…
AFK67_09745_ALB66750.1	ALB66750.1	CP012266.1	Cronobacter dublinensis subsp. dublinensis LMG 23823	Mn-catalase Group 03	MFRHVKQLQYTVRVAGPNPGLANLLLEQFGGPQGELAAATRYFTQGLGDEDPARKEMLMDIATEELSHLEIIGSLVGMLNKGAKGDLAEATESEGELYRSITGAGNDSHLTQVLYGGGPPLTNSAGVPWTAAYIDTIGEITADLRSNIAAEARAKIIYERLINLTDDPGVKDALGFLMTREVAHMLSFEKALYSIRNNFPPGKLPPVEQYTNVYYNMSKGDDLRGSWNSDENFEYVADPQPAVNGGDGMIDIQLGPDQQASVLNMAQRLQSDPGINPVTGAEMGASLPPLERQAKKPGEKK
AFK67_17175_ALB68111.1	ALB68111.1	CP012266.1	Cronobacter dublinensis subsp. dublinensis LMG 23823	catalase-peroxidase Group 4	MSTPNDTHNTLSAGKCPFHQGNNNQSAGGGTASRDWWPNQLRVELLSQHSNRTSPLGEDFNYRNAFSELDYAALKGDLKALLTDSQPWWPADWGSYTGLFIRMAWHSAGTYRSADGRGGAGRGQQRFAPLNSWPDNVSLDKARRLLWPVKQKYGQKISWADLFILAGNVALENSGFRTFGFGAGREDVWEPDMDVNWGDEKAWLEHRHPESLAQAPLGATEMGLIYVNPEGPNHSGDPASAAPAIRATFGNMGMNDEETVALIAGGHTLGKTHGAGAASHVGVDPEAAPIEAQGLGWTSNFGSGAGADAITSGLEVTWTQTPTQWSNYFFENLFKYEWVQTRSPAGAIQFEAVDAPEIIPDPFDPSKKRKPTMLVTDLTLRFDPEFEKISRRFLNDPQA…
AFR_12380_AGZ40762.1	AGZ40762.1	CP006272.1	Actinoplanes friuliensis DSM 7358	catalase-peroxidase Group 4	MDNEDKCPVAHTSRGGTSTRDWWPDQLDVTVLHQNPPASDPMGMDFDYAAAFDTVDLAAVKADIETVMTTSQDWWPADYGHYGPLFIRMAWHSAGTYRISDGRGGAGSGEQRFAPLNSWPDNGNLDKARRLLWPVKKKYGSKISWADLMVFAGNCALESMGLRTYGFGGGRVDVWEPELVNWGTEETWLGDERHSGDRELTDPLAAVQMGLIYVNPEGPNGNPDPLAAARDIRETFRRMAMNDEETVALIAGGHTFGKTHGAGPATAVGPEPEAAPIQELGLGWRSTFGTGKGRDAITSGLEGAWTPTPVNWDNSFFETLFAYEWQLSRSPAGAQQWIPTDPAAATAVPDAHDPSTTHTPVMLTTDLALRLDPIYEPISRRFHENPQELAEAFAKAWFK…
AFR_15270_AGZ41336.1	AGZ41336.1	CP006272.1	Actinoplanes friuliensis DSM 7358	catalase-peroxidase Group 4	MSDTQDNPASAQGVDKKAEAGCPVAHDSVTAHGSESENPAIDSPTPKTGGRPHTNRDWWPNQLDLSVLHAHSDKGNPLGPDFSYAKEFAKLDVEAVKRDITTVLTTSQDWWPADFGHYGGLMIRMSWHAAGTYRIQDGRGGAGDGGQRFAPLNSWPDNANLDKARRLLWPVKQKYGQSISWADLLVLGGNVALESMGFKTFGFGFGRVDVWEPEEIFWGPEDAWLGDERYVSDDKMAEDVGATEMGLIYVNPEGPRGSGDFRAAAHFIRETFARMAMNDEETVALIAGGHTFGKTHGAGPADGHVGPEPEGAEIDKQGLGWLSTYGTGKGPDTITSGLEVTWTDKPTQWSNRFFEILFGYEWELSTSPGGAKQWVAKDADAIIPDAYDAAKKHKPTMLT…
AFR_20410_AGZ42354.1	AGZ42354.1	CP006272.1	Actinoplanes friuliensis DSM 7358	typical catalase Group 5	MAVKRPRKSQPTTPAPAEKDPAGTTPLAGALAPEQGLQSGEFLTTAEGLRIGDTDHSLKAGPRGPSLLEDFHLREKITHFDHERIPERVVHARGAAAHGVFKAYGSAASVTKARFLAEEGKETPVFVRFSTVLGSRGSADTVRDVRGFAVKFYTDEGNVDLVGNNMPVFFIQDGIKFPDIIHAGKPHPDREIPQAQSAHDTFWDFVSLHTEATHHVMWAMSDRGIPRSYRTMEGFGVHTFRLVDADGGTHLVKFHWKPVAGVHSLVWEEAQLAAGTDPDFHRRDLADGIDAGAFFEYELGVQVFPDSDEETFEGIDLLDPTKIVPEELAPVQPLGLLTLNRNPDNYFAETEQVAFHTGHLVPGIEITNDPLMQARMFSYLDTQLTRLGGPNFAQLPINR…
AFR_21995_AGZ42669.1	AGZ42669.1	CP006272.1	Actinoplanes friuliensis DSM 7358	Mn-catalase Group 10	MFKHVDYLQFQAKPEKPDALLARKMQELVGGQFGEMTVMMQYLWQGWSCRVPGKYKDMIMDIATEEIGHVEMLTTMLARLLEGAPGEATEKAAAANPLLAAVLGGMSPQHAIVSGGSALPRDSEGTPWNTGYIAASGNLLTDFRSNVAAEAQSRLMTSRVYNMTDDRGVKDMLQFNLARDTYHQQQWLLGIEQLIEDGFVEHGIENSNGEDEKDFANHTFYSFDPESKAGEGRWARGPALIGKEEIEYVPDAVPLTDDKPLGPAPDPKLYVTYAGDMGKGKPGTGAGAHAQGVANVVNKIKGALD
AFR_23395_AGZ42949.1	AGZ42949.1	CP006272.1	Actinoplanes friuliensis DSM 7358	typical catalase Group 5	MDPRKPVEVVKDVVEAAAAKVTDALSPDVPGAPGSGTPSLAEPTTPHDPLPPKKEQGTPETRTPTGAETGVPPTAKGQQGAYLTTAQGARLRDTDHSLKAGARGPVLLQDHHFREKIMHFDHERIPERVVHARGAGAHGVFTSYGTAEGLTRAGFLKKNVETPVFVRFSTVLGSRGSADTVRDTRGFATKFYTEEGTFDLVGNNIPVFFIQDAIKFPDVIHAGKPHPDREIPQAQSAHDTFWDFVSLHTEAQHHTIWNMSDRGIPRSYRTMEGFGVHTFRLVNDAGETVLVKFHWKPKLGVHSLTWEEAQLLSGLDPDFHRRDLYDAIESGAFPEWELGLQVFPDTPEETFAGVDLLDPTKIVPEELAEVQPVGRLVLNRTPTNFFAEVEQVAFHLGHL…
AGA_1789_CEF56112.1	CEF56112.1	LN609302.1	Acetobacter ghanensis	typical catalase Group 5	MTDEKSLSPSTQNSLHDHPPGSGDTQPENTIGHGGELHQIVGKDGNHADGAAHLTDNFGHRIADNENSLKAGQRGPTLLEDFILREKIFHFDHERIPERIVHARGSGAHGVFECTKAIPELTKASIFQKVGNSCPVFARFSTVTGGAGSVDTPRDVRGFAVKFYTDTGNWDLVGNNIPVFFIQDAIKFPDLVHSVKMEADRGYPQAASAHDTFWDFVSLMPESLHTVMWAMSDRGIPRSLRMMEGFGVHTFRLVNAAGEAHFVKFHWKPVQGIQSLVWDEAVKVSGADSDYHRRDLFESIDHGDFPAWELGVQVFDEAWAKKQPYDVLDATKLIPEEEIPVQIIGRMTLNRNVDNFFAETEQVAFLPTNIIPGIDFSNDPLLQGRLFSYLDTQKSRLGT…
AGROH133_09495_ADY65855.1	ADY65855.1	CP002249.1	Agrobacterium sp. H13-3	typical catalase Group 5	MAKTTSTSPSDKTETVTIHDQKLERGAGGELHQTAENDAPVLTTAQGGPVADDQNSLRVGPRGPLVVDDFHFREKIFHFDHERIPERVVHARGYGAHGFFETYESFSAYTKADFLQRAGEKTPAFVRFSTVAGNKGSADLARDVRGFAVKLYTQEGNWDLVGNNIPVFFIQDAIKFPDLIHAAKQEPDRAFPQAQTAHDNFWDFISLTPESMHMVMWAMSDRTIPRSFRFMEGFGVHTFRLVNAKDQSTFVKFHWKPKLGLQSVAWNEAVKINGADPDFHRRDLWQAIQSGNFPEWELQVQLFDQEFADSFDFDVLDPTKIIPEEILKPQPVGRLVLDRMPDNFFAETEQVAFMTQNVPPGIDFSNDPLLQGRNFSYLDTQLKRLGGPNFTHLPINAPK…
AGROH133_09724_ADY65944.1	ADY65944.1	CP002249.1	Agrobacterium sp. H13-3	catalase-peroxidase Group 3	MDATSKPAGKCPVMHGGNTASGKSVTEWWPNALNLDILHQHDTKTNPLGTSFNYREALKTLDVEALKADLRALMTESQDWWPADWGSYVGMMARVTWHAAGSYRVTDGRGGANTGNQRFAPLNSWPDNVNTDKGRRLLWPIKKKYGNKISWADLIALAGTIAYDVAGLKTFGFAFGREDIWAPEKDTYWGDEKEWLAPSDGRYGDVTKPETLENPLAAVQMGLIYVNPEGVNGKSDPLATAAQMRETFARMGMDDEETVALTAGGHTIGKSHGNGSAANLSPDPEAAGPEFQGLGWINTKGRGIGRDTVVSGIEGAWTSEPTKWDNGFFDMLFKHEWTLTHSPAGASQWAPITIAEEDKPVDVEDPSIRTIPMMTDADMALKVDPIYREISLKFKDDQD…
AGROH133_14051_ADY67644.1	ADY67644.1	CP002249.1	Agrobacterium sp. H13-3	typical catalase Group 5	MVPGQRLAGVNMAKKPDSTSSSVTIHDQKLVRGEGGELHQIATGDEPVLTTAQGGPVADDRNSLRVGPCGPLLVDDFHFREKIFHFDHERIPERVVHARGYGAHGYFETYDSLAAHTKADLFQRAGEKTPAFVRFSTVAGNKGSADLARDVRGFAVKLYTKEGNWDLVGNNIPVFFIQDAIKFPDLIHAAKQEPDRAFPQAQTAHDTFWDFISLTPESMNMVMWIMSDRTIPRSFRFMEGFGVHTFRLINAKGESSFVKFHWKPKLGLQSVAWNEAVKINGADPDFHRRDLWTAIQSGNFPEWELQVQLFDQDFADSFDFDVLDPTKIIPEEILAPKPVGRLVLDRMPDNFFAETEQVAFMTQNVPPGIDFSNDPLLQGRNFSYLDTQLKRLGGPNFTH…
AGROH133_14471_ADY67897.1	ADY67897.1	CP002250.1	Agrobacterium sp. H13-3	typical catalase Group 5	MVKKSTPSKTAATSLKASASKNLSTPKQASANTVTIHDQQLHRGEGGELHQFAEGDTPVMTTAQGGPVADDQNTLRVGARGPLILDDFHYREKMFHFDHERIPERVVHARGYGAHGFFETYESLAAYTRADLFQRPGEKTPVFVRFSTVAGNKGSADLARDVRGFAVKMYTKEGNWDLVGNNIPVFFIQDAIKFPDLIHAAKQEPDRAFPQAQTAHDNFWDFISLTPESMNMIMWIMSDRTIPRSFRFMEGFGVHTFRFLNDKDESTFVKFHWKPKLGLQSVAWNEAVKINGADPDFHRRDLWQSIQSGNFPEWELCVQLFDQDFADNFDFDILDPTKIIPEEILPAQPIGRLVLDRMPDNFFAETEQVAFMTQNVPPGIDFSNDPLLQGRNFSYLDTQ…
AHOG_01075_ASO17882.1	ASO17882.1	CP022521.1	Actinoalloteichus hoggarensis	typical catalase Group 6	MTDARFTTNNVGIPVASDDHSLTAGPNGPILLQDHYLIEKNAQFNRERVPERVVHAKGGGAFGFLEVTEDVSQYTKAALFQPGVKTEALTRFSTVAGELGSPDTWRDPRGFAIKFYTSEGNYDLVGNNTPVFFLRDPIKFPDFIRSQKRRADNGRRDHDQQWDFWTLQPETAHQVTWLMGDRGIPKTWRHQNGYGSHTYLWENAGGEKFWVKYHFKTDQGIDFLTSGEAATLAGENADHHIADLWDAIVAGDHPSWTLYVQVMPYEDAADYRFNPFDLTKVWPHGDYPLIKVGRLVLDRNPENYFAQIEQSAFEPTNLVPGIGPSPDKMLLGRMFSYPDAHRYRIGANYAQLPVNQPKSPVNSYSKDGAMRYSNPGDPVYAPNSYGGPHADARKAGETS…
AHOG_12455_ASO20134.1	ASO20134.1	CP022521.1	Actinoalloteichus hoggarensis	typical catalase Group 5	MAVSPEPEEHPVDPARGGDEKDADLASARVDPAGARLTTSQGVRVEHTDDSLTVGERGPTLLEDFHAREKITHFDHERIPERVVHARGAGAYGYFQPYDDSLADHTVAEFLRDPSIRTPVFVRFSTVAGSRGSADTVRDVRGFATRFYTRQGNYDLVGNNMPVFFIQDGIKFPDFVHAVKPEPHNEIPQAQSAHDTFWDFVGLHPESLHVVMWLMSDRSLPRSYRMMQGFGVHTFRLVDAAGVGTFVKFHWTPKLGTHSMIWEEYQRVAGNDPDFHRRDLWNAIEAGDHPEWELGVQLVPESDEFSFDFDLLDATKLIPEEIVPVLPVGRLVLDRNPDDFFAETEQIAFHTANLVPGIDFTNDPLLQARNFSYLDTQLIRLGGPNFSQLPVNRPITPVH…
AHOG_20220_ASO21661.1	ASO21661.1	CP022521.1	Actinoalloteichus hoggarensis	Mn-catalase Group 10	MFRHTKLLQFEAKPEKPDAAYARKLQELIGGAYGEMTVTMQYLFQGWNCRIEGKYKDLIMDTATEEIGHVEMLATMVARLLEGAPATVMAEAVQDPVTAAVIGGMDPQQAIIAGGGALPNNSQGVPWNGAYIVASGNLLADFRANAAAEAQGRLQTARLYNMTDDPGVRSMLQFNLARDTVHQKQWLAAIEELEEDGLETPIAPSALFDEEDQVHNNTVWRLSDGHDGSKGGWSSGPDGIEYLKDPRPLGGPGTAPKPDPALYGTYEPVRDAMGTMKGKAKEVKNRLTGKNR
AJAP_08455_AIG74594.1	AIG74594.1	CP008953.1	Amycolatopsis japonica	catalase-peroxidase Group 4	MSDNPEKGCPVAHDSVTAHGSESENPAIDSPTPKSGGRPRTNKDWWPNQLDLSVLHAHSSKSNPLGADFSYAKEFAKLDVEALKRDITEVLTTSQDWWPADFGHYGGLMIRMSWHAAGTYRIHDGRGGAGDGAQRFAPLNSWPDNANLDKARRLLWPVKEKYGQQISWADLLVLAGNVALESMGFKTFGFGFGRVDTWEPEEIFWGPEDTWLGDERYASDTEMVPDVGATEMGLIYVNPEGPRGNADPAAAAHFIRETFARMAMNDEETVALIAGGHTFGKTHGAGIADDHVGPEPEAAPLETQGLGWLSTHGSGKGADAITSGLEVTWTDKPTQWSNRFFEILFGYEWELTTSPGGAKQYVAKDAEAIIPDAHDPAKKHKPTMLTTDLALRVDPEYEK…
AJAP_17485_AIG76365.1	AIG76365.1	CP008953.1	Amycolatopsis japonica	catalase-peroxidase Group 4	MSDSPDAVIGEMNEESAGGCPVSSGRRNHPTEGAGNRDWWPNQLNLKILRKHSAASDPMDAGFDYAAEFKTLDLGELAKDVDAVLTTSQDWWPADFGHYGGFMIRMAWHSAGTYRIEDGRGGAGAGMQRFAPLNSWPDNGNLDKARRLLWPVKKKYGRKISWADLMIFTGNRALETMGFKTFGFAGGRADVWEPDEDVYWGPERTWLGDERYSGDRQLEGPLAAVQMGLIYVNPEGPNGNPDPLAAARDIRETFGRMAMNDEETVALIAGGHSFGKTHGAADPDKYVGAEPEGASIEEQGLGWKNSFGSGKGRDAITSGLEVTWTPTPTQWSNWFFHNLFEYEWELTKSPAGAHQWTPKDGKAKNTVPDPEDGKLNRAPGMLTTDLALRFDPVYEQISR…
AJAP_18265_AIG76520.1	AIG76520.1	CP008953.1	Amycolatopsis japonica	Mn-catalase Group 10	MFRHTKSLQFEAKPEKPDALYARKLQELIGGAYGEMTVTMQYLFQGWNCRIEGKYKDLIMDTATEEIGHVEMLATMVARLLEGAPATMVAEAAKDPATAAILGGMDPQQAIISGGGATPSDSQGYPWNGRYVVASGNLLADFRANAAAEAQGRLQTARLYNMTDDPGVKAMLQFNLARDTVHQKQWLAAIEELKADGLESDIAPTALFDEENQDHNNTVWHLSDGPDGAKGGWSFGEDGIEYLMDPEPLGGPGTAPKPDPALFGTYAPLQDAVGTVKGKAKDAKKKATKSRKS
AJAP_23500_AIG77551.1	AIG77551.1	CP008953.1	Amycolatopsis japonica	typical catalase Group 5	MAQHREDAKNEQLDGSRVDPEGSVLTTQQGVRVDHTDDSLTAGSRGPTLLEDFHAREKITHFDHERIPERVVHARGAGAYGFFEAYDDALADYTVAEFLTSGEKIPVFVRFSTVAGSRGSADTVRDVRGFATKFYTRQGNYDLVGNNMPVFFIQDGIKFPDFVHAVKPEPHNEIPQAQSAHDTFWDFVSLQPESLHMVLWLMSDRALPRSYRMMQGFGVHTFRLVNAEGKGTFVKFHWKPALGTHSLVWDECQKIAGKDPDFNRRDLWDAIESGQYPEWELGVQLVDEDSEHDFDFDLLDATKIIPEEQVPVRPVGRMVLDRNPDDFFAETEQIAFHTANIVPGIDFTNDPLLQARNFSYLDTQLIRLGGPNFSQLPVNRPIAPVHTNQRDGYGQQNVH…
AJAP_39875_AIG80754.1	AIG80754.1	CP008953.1	Amycolatopsis japonica	typical catalase Group 6	MTLPTTNNVGIPVASDNDSLTVGANGPILLQDHYLIEKNAQFNRERVPERVVHAKGGGAHGFLEVTEDVSQFTKAALFQPGVRTESLARFSSVAGENGSPDTWRDPRGFAVKFYTSEGNYDLVGNNTPVFFIRDPIKFPDFIHSQKRRADNHLRDHDIQWDFWTLRPESAHQVTWLMGDRGIPSNWREMDGFGSHTYLWENAGGEKFWVKYHFKTDQGIGYLPQADADRIAGEDSDYYIRDLFKNIKQGNHPSWTLYVQVMPYAEAADYRFNPFDLTKVWPKGDYPLIKVGRWVLDRNPANYFAEIEQAAFEPSNLVPGIGPSPDKMLQGRLFAYPDAHRYRIGANYTQLPVNAPKSPVNSYSRDGAMRYNNPGDPVYAPNSYGGPHASAEIASETASG…
AJGP001_01615_AQU78080.1	AQU78080.1	CP019401.1	Planococcus faecalis	typical catalase Group 6	MTTNKTGLTTSWGAPVGDNQNSQTAGQRGPILLQDVHLLEKLAHFNRERIPERVVHAKGTGAHGYFEVTQDVSTYTKAAFLSEVGKKTEMFARFSTVAGELGSADTVRDPRGFSLKFYTEEGNYDLVGNNTPIFFIQDAIKFPDFIHTQKRDPRTHLKNPNAVWDFWSLSPESLHQVTYLMGDRGIPATLRHMHGFGSHTFKWTNAEGESVWVKYHMLTEQGIQNITQEVADKIAGENPDFHTEDLFNSIEEGDFPAWKMYVQVMPLEDANTYRFDPFDVTKTWSHKDYPLMEVGRMVLNRNPENYFAEVEQATFSPGTLVPGIDVSPDKMLQGRLFAYHDAHRYRVGANHQMLPINAAKNQVNNYQRDGQMNFGNNGGGSVYYEPNSYGGPTETAAAK…
AJGP001_14665_AQU80447.1	AQU80447.1	CP019401.1	Planococcus faecalis	typical catalase Group 5	MTKQPEVNKNSKDEQLEQYRVDDSGKSLTTNQGLKMAEDEFSLKAGERGPTLLEDFHFREKMTHFDHERIPERVVHARGYAAHGVFETYDSLEHLTKAKFLSEKGKKTPVFVRFSTVAGSKGSAETVRDLRGFATKFYTEEGNYDLVGNNVPVFFIQDAIKFPDFVHAVKPEPHNEMPQAASAHDTLWDFVINNQETAHTMMWLMSDRAIPRSFRMMDGFGVHAFRFINAEGKSHFVKFSWKSTLGTHSLVWDEAQKISGKDPDFNRRDLYDSIEQGDFPEWELGVQIVAEEDEYKFDFDLLDATKLWPQEEIPMQMVGKMTLNRNVDNVFAETEQVAFHPGHVVPGIDFSNDPLLQGRLFSYTDTQLLRLNGPNFHELPINRPVCPFHNNQRDGFGRQ…
AJGP001_17075_AQU80896.1	AQU80896.1	CP019401.1	Planococcus faecalis	catalase-peroxidase Group 3	MENNEEKRHTAAGEGQCPVTGGHKDSAITTSNKPGKTQNKDWWPNMLNVNILHQHDTKTNPLGEAFDYKAEFEKLDYEALKQDLHKVMTDSQDWWPADYGHYGGLFIRMSWHDAGTYRTADGRGGGSTGNQRFAPLNSWPDNVNLDKARRLLWPIKQKYGSKISWADLLLLTGNVALESMGFKTFGFGAGREDIWAPEEDVYWGNEKEWLEDNRYSGERDLENPLAAVQMGLIYVNPEGPNGKPDPLASAVDIRETFARMGMNDEETVALIAGGHTFGKAHGAGDPAEVGDDPEAAVMENMGIGWKSTHGSGKGRDTISSGIEGAWTANPTKWDNGYYEQLFEYEWELTKSPAGAYQWTAKDLSEHQMAPDAEDASIKVKTMMTTADMALRMDPAYEKI…
AK823_03360_AMN49045.1	AMN49045.1	CP012529.1	Psychrobacter sp. P2G3	typical catalase Group 5	MNKNLDYTDPAKNMNTERGNGGETHQRAGDDTKVLTTQQGVAISDNQNSLKAGARGPTLLEDFVLREKIHHFDHERIPERIVHARGSAAHGYFELTESLEEYTTAKILTETGKQTPLFTRFSTVAGNKGSKDTPRDVRGFAVKIYTEEGNWDIVGNNMPIFFIQDAMKFPDLIHAVKPEPDRGFPQAASAHDTFWDFVSLSPETMHNLIWLMSDRALPRSLRMMEGFGIHSYRLINKDGKSTFVRFHWKPVLGVQSTTWDEAVKISGADPDYHRRDLFESINNGDYPEWEFGVQLFTEEEANEFPFDHLDATKLIPEEMVPVKVVGKMVLNRYPDNFFAETEQVAFCPSHLPPGIDFSNDPLLQGRLFSYLDTQLSRLGSPNFAQIPINAPKCPFANNQ…
AK823_06350_AMN50896.1	AMN50896.1	CP012529.1	Psychrobacter sp. P2G3	catalase-peroxidase Group 3	MGGCPVMHQAHTTTASAATDWWPNSLNLDILHQQDQKTNPMGADFDYAEAFKQLDLEAVKQDLKALMTESQEWWPADWGHYGGLMIRMAWHSAGTYRSADGRGGSNTGNQRFAPLNSWPDNVNLDKARRLLWPIKKKYGNKLSWADLMILAGNMAYESMGFKTLGFAGGRADIWHPEKDIYWGSEREWLAATENRYESDQERTSLENPLAAVQMGLIYVNPEGVDGNPDPLKTAQDMRTTFARMSMNDEETVALTAGGHTVGKCHGNGDATILEDEPEAADMAEQGLGWHNPKGKGNAGDTVSSGIEGAWTTNPTQWDHGYFELLLGHNWELTKSPAGAWQWEPTDIREEDRPLDAHDPSVRRNPIMTDADMALKKDPIYREISEKFHQNPEYFDEVFA…
AK825_03295_AMN66863.1	AMN66863.1	CP012533.1	Psychrobacter sp. P11G5	typical catalase Group 5	MNKNLDHTDPAKNMNTERGTGGETHQRAGDDTKVLTTQQGVAISDNQNSLKAGARGPTLLEDFVLREKIHHFDHERIPERIVHARGSAAHGYFELTESLEEYTTAKILTETGKQTPLFTRFSTVAGNKGSKDTPRDVRGFAVKIYTEEGNWDIVGNNMPIFFIQDAMKFPDLIHAVKPEPDRGFPQAASAHDTFWDFVSLSPETMHNLIWLMSDRALPRSLRMMEGFGIHSYRLINKDGKSTFVRFHWKPVLGVQSTTWDEAVKISGADPDYHRRDLFESINNSDYPEWEFGVQLFTEEEANEFPFDHLDATKLIPEEMVPVKVVGKMVLNRYPDNFFAETEQVAFCPSHLPPGIDFSNDPLLQGRLFSYLDTQLSRLGSPNFAQIPINAPKCPFANNQ…
AK825_06410_AMN68803.1	AMN68803.1	CP012533.1	Psychrobacter sp. P11G5	catalase-peroxidase Group 3	MGGCPVMHQAHTTTASAATDWWPNSLNLDILHQQDQKTNPMGADFDYAEAFKQLDLEAVKQDLKALMTESQEWWPADWGHYGGLMIRMAWHSAGTYRSADGRGGSNTGNQRFAPLNSWPDNVNLDKARRLLWPIKKKYGNKLSWADLMILAGNMAYESMGFKTLGFAGGRADIWHPEKDIYWGSEREWLAATENRYESDQERTSLENPLAAVQMGLIYVNPEGVDGNPDPLKTAQDMRTTFARMSMNDEETVALTAGGHTVGKCHGNGDATILEDEPEAADMAEQGLGWRNPKGKGNAGDTVSSGIEGAWTTNPTQWDHGYFELLLGHNWELTKSPAGAWQWEPTDIREEDRPLDAHDPSVRRNPIMTDADMALKKDPIYREISEKFHQNPEYFDEVFA…
AKJ09_04864_AKU98200.1	AKU98200.1	CP012333.1	Labilithrix luteola	typical catalase Group 5	MNWSTLAEDVASREMEEAGNAMGSKKRAAKAGRSGSSDTLAGSGGELHQTASSRGVLLTTNQGIVVSDDQNSLRVGPRGPSLLEDFVLREKITHFDHERIPERIVHARGSGAHGYFQPYKSLSKLTRAAFLQNPNKRTPVFVRFSTVAGGAGSVDLPRDVRGFAVKFYTEEGNFDLVGNNIPVFFIQDAIKFPDLIHSVKMEPDRGYPQAGSAHDTFWDFASLMPESMHMLMWAMSDRAIPRSFRMMEGFGVHTFRFVDSKGASTFVKFHWRPTIGSQSVLWDEAMKISGADPDFHRRDLFEAIEAGDYPEFEFCIQTFDEKTAAKFPFDILDATKIIPEEVVPLQPIGKMVLDKNAENFFAETEQVAYHPGNLVPGIDVTDDPLLQGRLFSYQDTQLI…
AKJ09_05053_AKU98389.1	AKU98389.1	CP012333.1	Labilithrix luteola	catalase-peroxidase Group 4	MTTESKCPFPRSLGGGTSNRDWWPNQLRLDLLHQHSSKSNPMGERFDYANEFRSLDFAALKEDLAALMTDSQDWWPADFGHYGPLFIRMAWHSAGTYRIGDGRGGGGRGQQRFAPLNSWPDNGNLDKARRLLWPIKQKYGRKISWADLFILAGNVALETMGFETFGFAGGREDVWEPDEDVYWGTEKTWLGGDKRYSGERDLENPLAAVQMGLIYVNPEGPNGYPDPVAAAKDVRETFARMAMNDEETVALIAGGHTFGKTHGAGPASHVAADPESADLEAQGLGWKNDLGAGKGGDAITSGLEVTWSTTPTKWSNDFFEHLFGYEWELTKSPAGAHQWKPKGAEGAGTVPDAHDASKRIAPSMLTTDLSLRFDPAYEKISRRFMEHPDQFADAFARAW…
AKJ12_04775_AKU49166.1	AKU49166.1	CP012251.1	Xanthomonas arboricola pv. juglandis	catalase-peroxidase Group 4	MTTEAKCPFNHAVVGTGTTNRDWWPKQLRVDLLSQHSSKSNPLGQTFNYAEAFKRIDLAALKQELRALMTDSQDWWPADFGHYGPLFVRMAWHSAGTYRIGDGRGGGGRGQQRFAPLNSWPDNVSLDKARRLLWPIKQKYGQAISWADLMILTGNVALESMGFKTFGFAGGREDTWEPDQDLYWGRETKWLGGDERYSRGSPGVDEAHGVLVKDDDSEVPHTRDLENPLAAVQMGLIYVNPEGPDGKPDPVAAARDIRDTFARMAMNDEETVALIAGGHTFGKTHGAGPADNVGAEPEAGELESQGLGWHNRYGSGKGADTITSGLEVTWTTTPAQWSNDFFDHLFKFEWELSKSPAGAHQWVAKNADAIIPDAHDAAKKHRPTMLTTDLALRFDPAYE…
AKJ12_05240_AKU49248.1	AKU49248.1	CP012251.1	Xanthomonas arboricola pv. juglandis	typical catalase Group 5	MPKSPSKSAQLPSTAAVSATPETLRGTGDELHQKAGGTHPQLTTNQGIPVGDNQNSLRATPRGPTLLEDFILREKITHFDHERIPERIVHARGSAAHGYFELTKSLSQYTTAKIFTEVGEKTPLFTRFSTVAGGAGSVDTPRDVRGFAVKFYTKEGNWDLVGNNIPVFFIQDSMKFPDLIHAVKMEPDRGFPQAASAHDTFWDFISLSPESMHMIMWAMSDRTIPRSLRMIEGFGIHSFRFLNEKGDSTFVKFHWRPKLGLQSTIWDEAVKIAGADQDFHRRDLFESIQSGDFPEWELGVQLFTEAEADAFPFDHLDSTKVIPEELVPLQIVGRMVLDRWPDNFFAETEQVAYCPANIVPGIDFSNDPLLQGRLFSYLDTQLSRLGGPNFHQIPVNAPK…
AKJ12_21260_AKU52025.1	AKU52025.1	CP012251.1	Xanthomonas arboricola pv. juglandis	typical catalase Group 4	MRPGSLMVLALLAPTLIAPPVFAQSVLTRDNGAKVGDNQNSQTAGANGPTLLQDVQLIQKLQRFDRERIPERVVHARGTGVKGEFTATADLSSLTKAKVFSAGEKTPVFVRFSSVVHGNHSPETLRDPHGFATKFYTSEGNWDLVGNNFPTFFIRDAIKFPDMVHAFKPDPRTNLDDDSRRFDFFSHVPEGTRTLTLLYSNEGTPAGYRFMDGNGVHAYKLVNAQGEVHYVKFHWKTLQGIKNLDPKQVAAVQAKDYSHLTNDLVGAIKKGDFPKWDLYVQVLKPEDLAKFDFDPLDATKIWPDVPEQKVGQMVLNKNVDNFFQETEQVAMAPANLVPGIEPSEDRLLQGRIFSYADTQLYRIGANGLNLPVNRPRVAVNNGNQDGEGNNGHTTSGVNY…
AKL17_0206_AMY67468.1	AMY67468.1	CP012661.1	Defluviimonas alba	typical catalase Group 5	MPKDPTPLYPATADTQTSHDVVDRPRNPGAGGETHQQPDGKAPALTTSQGAPVADNQNTLRGGTRGPALMEDFHFREKIFHFDHERIPERVVHARGYGAHGYFETLEAIPELTAANLFQKAGEITPAFVRFSTVAGNKGSQDLARDVRGFAVKLYTQEGNWDIVGNNIPVFFIQDAIKFPDLIHAAKDEPDRGFPQAQTAHDNFWDFISLMPESMHMVMWIMSDRTIPRSFRFMEGFGVHTFRMVNARGEGSFVKFHWRPRLGMQSVLWDEALKINGADPDFHRRDLWDAIQSGDFPEWELGLQVFDDAFADAFPFDVLDPTKIIPEEDVPLRIVGRLVLDRMVDNFFAETEQVAFCTQNIVPGIDFTNDPLLQGRNFSYLDTQIKRLGGPNFTHIPIN…
AKL17_2099_AMY69345.1	AMY69345.1	CP012661.1	Defluviimonas alba	typical catalase Group 7	MTQRLTTTAGAPVANNQNSETAGPRGPVLMQDYHLMEKLAHQNRERIPERVVHAKGWGAFGTFTVTHDITRFTRAAIFGAVGKQTDMLARFSTVAGEAGAADHERDVRGFALKFYTEEGNWDLVGNNTPVFFIRDPLKFPDFIHTQKRHPRSNLRSNTAAWDFWSLVPESLHQVSILMSDRGLPISPMHMNGYGSHTYSFWNRDGERFWVKFHFKTQQGVKTVTNDEAATIVGQTREGYQEALFGGIEAGNFPRWTLFVQVMPEADADSTPYDPFDLTKVWPHSDYPLIEVGVMELNRNADNYFTQIEQAAFSPSNKVPGIGYSPDKMLQARVFSYADAHRYRLGTHYEALPVNQPKCPVHHYHAAGNMNFIGLRSGAGDAYYEPNSMGGVGEDPTVAE…
AKN89_07425_AKX57664.1	AKX57664.1	CP012364.1	Oblitimonas alkaliphila	typical catalase Group 7	MTTTKKPQLTSISGAPVANNQDSLTAGPRGPMLLQDVWFLEKLAHFDREVIPERRMHAKGSGAFGQFTVTHDISQYTKAALFSEIGKQTEMFVRFSTVAGERGAADAERDIRGFAMRFYTEQGNWDLVGNNTPVFFFRDPLKFPDLNHAVKRDPRTNMRSPTNNWDFWTGLPEALHQVTIVMSDRGIPASYRHMHGFGSHTFSFINAANERYWVKFHLRTQQGIKNLTDQEAAELVGQDRESSQRDLYEAIERGDYPRWTMFVQIMPEADAEKVPYHPFDLTKVWPKGDYPLIEVGYFELNRNPENYFADVEQAAFNPAHIVPGIGFSPDRMLQGRLFSYGDAQRYRLGVNHAQIPVNTPRCPYHSFHRDGAMRVDGNQGSRLHYEPNSYGEWQQQPDF…
AL1_12360_CBK63712.1	CBK63712.1	FP929032.1	Alistipes shahii WAL 8301	typical catalase Group 7	MDKKKLTAENGRPIADNQNIQTAGKRGPVTLQDPWFLEKLAHFDREVIPERRMHAKGSGAFGTFTVMHDITKYTRASIFAEVGKQTPCFVRFSTVAGERGAADAERDIRGFAIKFYTDAGNWDLVGNNTPVFFLRDPLKFPDLNHAIKRDPRTGLRSPNSNWDFWTLLPEALHQVTITMSPRGIPASFRHMHGFGSHTYSFYDKDNRRTWVKFHLRTEQGIRNLTDAEAEAIIAKDRESNQRDLFEAIERGDYPRWLMQVQLMTEEQARTYKINPFDLTKVWYHGDFPLHDVGILELNRNPENFYAEVEQAAFNPMNIVEGIGFSPDKMLQGRLFSYGDAQRYRLGVNHNLIPVNKPRCPFHAYHRDGQMRTDDNYGATTPYEPNSYGEWQDTPALKEP…
AL346_16360_ALA18692.1	ALA18692.1	CP012398.1	Chelatococcus sp. CO-6	typical catalase Group 7	MSKSTMTTASGAPVADNQNSLSAGPRGPLLMQDFQLLEKLAHQNRERIPERTVHAKGSGAYGTLTITNDISRYSRAKIFSQIGKQTEAFLRFSTVAGERGAADAERDVRGFALRFYTEEGNWDIVGNNTPVFFVRDPLKFPDFIHTQKRHPVTNMRSNTAMWDFWSLSPESLHQVTILMSDRGLPQNYRQMHGFGSHTYSFVNAAGERFWVKFHFKSMQGIAIWTNAEAENVIGKDRESAQRDLFESIEKGDHPRWRFCVQVMPELDAEKTPYNPFDLTKVWPHADYPLIEVGILELNRNPQNYFAEVEQAGLTPANVVPGIGFSPDKMLQARIFSYADAHRYRLGINHHQIPVNQPRCPVHTYHADGAMRLAGHANANAYYEPNSFGGPAQNPDYAEP…
AL477_07625_AMG15334.1	AMG15334.1	CP014099.1	Shigella sonnei	typical catalase Group 5	MSQHNEKNLHQHQSPLHDSSEAKPGMDSLAPEDGSHRPAAEPTPPGAQPTAPGSLKAPDTRNEKLNSLEDVRKGSENYALTTNQGVRIADDQNSLRAGNRGPTLLEDFILREKITHFDHERIPERIVHARGSAAHGYFQPYKSLSDITKADFLSDPNKITPVFVRFSTVQGGAGSADTVRDIRGFATKFYTEEGIFDLVGNNTPIFFIQDAHKFPDFVHAVKPEPHWAIPQGQSAHDTFWDYVSLQPETLHNVMWAMSDRGIPRSYRTMEGFGIHTFRLINAEGKATFVRFHWKPLAGKASLVWDEAQKLTGRDPDFHRRELWEAIEAGDFPEYELGFQLIPEEDEFKFDFDLLDPTKLIPEELVPVQRVGKMVLNRNPDNFFAENEQAAFHPGHIVPG…
AL477_18155_AMG17128.1	AMG17128.1	CP014099.1	Shigella sonnei	catalase-peroxidase Group 4	MSTSDDIHNTTATGKCPFHQGGHDQSAGAGTTTRDWWPNQLRVDLLNQHSNRSNPLGEDFDYRKEFSKLDYYGLKKDLKALLTESQPWWPADWGSYAGLFIRMAWHGAGTYRSIDGRGGAGRGQQRFAPLNSWPDNVSLDKARRLLWPIKQKYGQKISWADLFILAGNVALENSGFRTFGFGAGREDVWEPDLDVNWGDEKAWLTHRHPEALAKAPLGATEMGLIYVNPEGPDHSGEPLSAAAAIRATFGNMGMNDEETVALIAGGHTLGKTHGAGPTSNVGPDPEAAPIEEQGLGWASTYGSGVGADAITSGLEVVWTQTPTQWSNYFFENLFKYEWVQTRSPAGAIQFEAVDAPEIIPDPFDPSKKRKPTMLVTDLTLRFDPEFEKISRRFLNDPQA…
AL479_07295_AMG92296.1	AMG92296.1	CP014015.2	Citrobacter amalonaticus	catalase-peroxidase Group 4	MSTPDDIHNPTSAGKCPFHQGGHDQSAGAGTTSRDWWPNQLRVDLLNQHSNRSNPLGEDFDYRKEFSKLDYAALKGDLRALLTESQPWWPADWGTYAGLFIRMAWHGAGTYRSVDGRGGAGRGQQRFAPLNSWPDNVSLDKARRLLWPIKQKYGQKISWADLFILAGNVALENSGFRTFGFGAGREDVWEPDLDVNWGDEKTWLAHRDPEELAKRPLAATEMGLIYVNPEGPNASGEPLSAASAIRATFGNMGMNDEETVALIAGGHTLGKTHGAGPATHVGPDPEVAPLENQGLGWKSDFGSGVGADAITSGLEVVWTQTPTQWSNYFFENLFKYEWVQTRSPAGAIQFEAVDAPEIIPDPFDPSKKRKPTMLVTDLTLRFDPEFEKISRRFLNDPQA…
AL479_18880_AMG94409.1	AMG94409.1	CP014015.2	Citrobacter amalonaticus	typical catalase Group 5	MSHNEKNPHPHQSPVHDPREAKPGLDSLAPDDDSYRPVPEPTPPGMHPTAPGSLKAPDTGNKKLSELENVRTGSENYALTTNQGVRIADDQNSLRAGHRGPTLLEDFILREKITHFDHERIPERIVHARGSAAHGYFQPYKNLGDITKADFLSDPDKITPIFVRFSTVQGGAGSADTVRDIRGFATKFYTEEGIFDLVGNNTPVFFIQDAHKFPDFVHAVKPEPHWAIPQGQSAHDTFWDYVSLQPETLHNVMWAMSDRGIPRSYRTMEGFGIHTFRLINAAGKATFVRFHWKPLAGKASLVWDEAQKLTGRDPDFHRRELWEAIEAGDFPEYELGLQLIPEEDELKFDFDLLDPTKLIPEALVPVQRVGKMVLNRNPDNFFAENEQVAFHPGHIVPGI…
AL509_03600_AUZ18529.1	AUZ18529.1	CP014028.2	Achromobacter xylosoxidans	typical catalase Group 5	MPGRKSSKARTQGAVDTAFNNTDSGPAAPPAPDTGSPAMKRAAAVAATAQAQPQHANKADEYGEAGARCPYRGAQVAPPDDSVGASSLSERERNAKTGEPAEAGVNAVDGQLGRVRADGQGQALTTNQGVAVSDNQHSLKAGLRGPALLKDFILREKITHFDHERIPERIVHARGSAAHGYFECYEPLTDLTRASLFAEQGKRTPVFVRFSTVAGERGSKDTARDVRGFAVKFYTDEGNWDLVGNNMPVFFIQDAMKFPDLVHAVKPEPHHGMPQAASAHDTFWDFVSLMPESTHMLMWLMSDRAIPRSYRMMQGFGVHTFRFVNAQGESRLVKFHWNPLQGTHSQVWDEAVKVSGADPDFHRRDLWEAIDAGHGPQWELGVQVFTEEEAERFSFDVLD…
AL509_12845_AMH05555.1	AMH05555.1	CP014028.2	Achromobacter xylosoxidans	typical catalase Group 7	MTDKKHLTTASGAPVADNNNTLTAGPRGPALLQDFWLIEKLAHFDRERIPERVVHAKGSGAYGTFTVTHDITKYTRASIFSKVGKQTPLFLRFSTVAGERGAADAERDVRGFAIKFYTDEGNWDLVGNNTPVFFIRDPLKFPDFIHTQKRDPKTNLRSATAAWDFWSLSPESLHQVTILMSDRGIPANLRQQHGFGSHTFSFVNAEGERFYVKFHFKSQQGIACLTDEEAAQVVAHDRESSQRDLFDNIEQGNFPKWTLKVQIMPAAEAETYHINPFDLTKVWPHGDYPLIEVGVLELNKNPENYFAEVEQAAFTPANVVPGIDFSPDKMLQGRLFSYGDTHRYRLGINHHQIPVNAPRCPFHSYHRDGAARVDGNAGGTLNYEPNSAGEWKETPSAGE…
AL518_11740_AMH18622.1	AMH18622.1	CP014031.2	Hafnia paralvei	typical catalase Group 7	MSKKGLTTAAGAPVVDNNNVITAGPRGPMLLQDVWFLEKLAHFDREVIPERRMHAKGSGAHGTFTVTHDITKYTRAKIFSEIGKQTPMMVRFSTVAGERGAADAERDIRGFAMKFYTEEGNWDLVGNDTPVFYLRDPLKFPDLNHVVKRDPRTNLRNPVYKWDFFSQLPEAFHQLTIDFSDRGLPKSYRHMHGFGSHTFSFINADNERFWVKFHFRCQQGIENLMDDEAEALVGKDRESSQRDLYDAIERKDFPRWNLQVQIMPEKEAAQTPYNPFDLTKVWPHKDYPLIDVGFFELNRNPDNYFAEVEQVAMNPANVVPGIGFSPDKMLQGRLFSYGDAHRYRLGVNHHQIPVNAPQCPFHNYHRDGAMRVDGNSGNGATYEPNSFGVFQEQPDFSEP…
AL705_05670_ALE19167.1	ALE19167.1	CP012390.1	Lawsonella clevelandensis	typical catalase Group 6	MTNEDPIERGLRPAPHNSATTTAAGAPVASDDFSLQQGKQGYIGLHDVGLIDKLAHFDRERTPERVVHAKGSGAFGIFDVTEDVSAYTAADFLQPGKKTPVLARFSTVAGEKGAADTQRDPRGFALKFYTEEGNYDMVGNNTPVFFIRDAIKFPDFIHSQKRTSDTDLQSFHMRWDFWTLSPESAHQVAWLFGDRGLPSSFREMDGFSSHSYQWINAKGERFWVKYHFKTDQGIGYLSQAEADKLAGSDPEYHRRDLYQHIQDGDYPSWTLKMQIMPEAEAENYKVNPFDITKTWSQKDYPLIPVGKLTLNQIPKNFHVQIEQAAFSPSNLVRGIGFSPDKMLLGRVFSYPDTQRHRLGANFEQLPPNRPVVDVNNYSHQGPAAMEFNDPSVPTYVPNS…
ALEK_2192_QKJ23452.1	QKJ23452.1	CP054052.1	Arcobacter lekithochrous DSM 100870	typical catalase Group 7	MKKTMTTTAGNPISDNQNSITAGERGPVLMQDYQLIEKLAHQNRERIPERVVHAKGSGAFGELEITHDISAFTKANVLQKGEKTRLLLRFSTVAGESGAADAERDVRGFALKFYTKEGNWDLVGNNTPVFFVRDPQKFPDFIHTQKRHPQSNLRSNTAAWDFWSLSPESLHQVTILMSDRGIPKSYRHINGYGSHTYSLINNENERFWVKFHFKTKQGIKTLTNEAASKVIASDRESNQRDLFENIENKNYPQWDFQIQIMNESQANNASFNPFDLTKVWPHSDYPMIDVGVMTLNENPKNYFNEIEQSSFSPSNIVPGISFSPDKMLQARILSYPDAHRYRVGTHYESLPVNRPIVEVNTYHTAGSMNYEEKEVTNAYYEPNSFDGAVQDASYSEPSL…
ALGA_2982_BAX81287.1	BAX81287.1	AP018042.1	Marinifilaceae bacterium SPP2	catalase-peroxidase Group 4	MENKSDHVSKCPVTGAMGKPSSGGGTKIKDWWPNHLNLNILRQHSSLSNPMGEEFNYAEEFKSLDLKAIKNDLHKLMTDSQEWWPADFGHYGPLFIRMAWHSAGTYRTGDGRGGAGGGQQRFAPLNSWPDNVNLDKARRLLWPIKQKYGKKISWADLMILAGNSALESMGFKTFGFGGGRADVWEPEEDVFWGNETKWLEGAERYTGERDLDNPLAAVQMGLIYVNPEGPEGNPDPVAAAKDIRETFARMAMNDEETVALIAGGHTFGKTHGAGDAAHVGAEPEAAGIEEQGLGWKNSFGSGKGGDTIGSGLEVTWTQTPAKWSYYFFENLFNYEWELTKSPAGAHQWAAKNAGKVVPDAHDASKKHLPTMLTTDLALRFDPAYEKISRRFFEHPLEFA…
ALSL_0031_BBD78710.1	BBD78710.1	AP018560.1	Rhodanobacteraceae bacterium Dysh456	Mn-catalase Group 03	MFAHNKRLQYTVRVSRPDPALANLLLEQFGGPQGELAAAVRYFSQAMAEDDPGRKDMLLDIATEELSHLEVIGTIVAMLNKGAKGKLAEGVEEQAQLFRELQGAGNDSHVTQILYGGGPALTNSAGQLWTAGYIENIGEPTADLRTNIAAEARAKIIYERLINVTPDPGIRDALGFLMTREIAHQQSFEKALYAIQPNFPPGKLAGKAEFANMYINTSQGEGDMRGSWNSDDNFNVVSDRERMLGMDGGSGMPEVRLPAEEQAMLERMAKRTLSDPSVNPTTGAELGLGKGKK
ALSL_1299_BBD79957.1	BBD79957.1	AP018560.1	Rhodanobacteraceae bacterium Dysh456	typical catalase Group 5	MASKKNDAGDMPRGQGGELHPQAGGQHPPMTTNQGIPVADDQNSLRTGPHGPVLLEDFVLREKITHFDHERIPERIVHARGSAAHGHFELTKSLAEYTTAKVLTEVGEKTPVFVRFSTVAGGAGSIDTPRDVRGFAVKFYTKEGNWDLVGNNIPVFFIQDAIKFPDLIHAVKMEPDRAFPQAATAHDTFWDYISLTPESMHMVMWAMSDRTLPRSLRMMEGFGIHSFRLLDAEGRSTFVKFHWRPKLGLQSTVWDEAMKLAGYDPDFHRRDLFEALQRGERPEWELAVQLFTDEDAAKFPFDHLDATKLIPEELVPLTPIGRLVLERWPDNFFAETEQVAFCPANIVPGIDFSNDPLLQGRLFSYLDTQLSRLGSPNFHQIPINAPKCPFANLQRDGHM…
AM1_3715_ABW28705.1	ABW28705.1	CP000828.1	Acaryochloris marina MBIC11017	catalase-peroxidase Group 3	MSSASKCPFSGGALKFTAGSGTANRDWWPNQLNLQILRQHSPKSNPMDKAFNYAEAFKSLDLADVKQDIFDLMKSSQDWWPADYGHYGPLFIRMAWHSAGTYRIGDGRGGAGTGNQRFAPINSWPDNANLDKARMLLWPIKQKYGAKISWADLMILAGNCALESMGFKTFGFAGGREDIWEPEEDIYWGAETEWLGDQRYTGDRDLEATLGAVQMGLIYVNPEGPNGHPDPVASGRDIRETFGRMAMNDEETVALTAGGHTFGKCHGAGDDAHVGPEPEGARIEDQCLGWKSSFGTGKGVHAITSGIEGAWTTNPTQWDNNYFENLFGYEWELTKSPAGANQWVPQGGAGANTVPDAHDPSRRHAPIMTTADMAMRMDPIYSPISRRFLDNPDQFADAF…
AM2010_1957_AKM08019.1	AKM08019.1	CP011805.1	Altererythrobacter marensis	catalase-peroxidase Group 3	MDVATGSIPGGGCPFSGDGGVRSLLGRTNRDWWPDALQLEILHQGSLSADPLGDDFDYCEAFNALDYEGIKRDLRALMTDSKPWWPADYGHYGPFFIRMAWHAAGTYRTGDGRGGASSGQQRFAPLNSWPDNANLDKARRLLWPIKQKYGKHISWADLFVLTGNIAIESMGGPVFGFGGGRKDVFEPETDVFWGTEEQWVSEGVQTRIDPDKELKLENPLAAIQMGLIYVNPEGPGGEPDPEGSARDIRETFARMAMNDEETVALTAGGHTFGKCHGAGDASLVGADPEGADIAFQGLGWTSGYESGVGEHAITSGLEGSWTNTPIEWTGNYFRLLLDYEYELVKSPAGANQWQPVNQKEEDMAPAAHDPSKKVPTMMTTADMAMKVDPEYRRISERFR…
AM2010_298_AKM06387.1	AKM06387.1	CP011805.1	Altererythrobacter marensis	typical catalase Group 5	MLEDHIAREKIFHFDHERIPERVVHARGYGIHGHFELKKAIPEYSHAAIFNEVGEKTPTFTRFSTVAGNKGSPDLARDVRGFATKFYTKQGNWDLVGNNIPVFFIQDAIKFPDLIHAAKPAPDRGFPQAQTAHDNFWDFITLSPESMHMVMWIMSDRAIPRSFRFMEGFGVHTFRMINAKGEAKFVKFHWKPALGLQSVIWNEALKINGMDPDFHRRDMWDSIEVGDFPQWDLGIQVFDEEFAERFEFDVLDATQIIPEEQVPVEIIGTLTLDANVDNFFAETEQVAFCTQNIIPGLDFSEDPLLQGRNFSYLDTQLKRLGGPNFTHIPINAPKCPVHNFQQDGHMAMTNPKGRANYEPNSWSGDMDDNREPRGPRASPDRGFTSYAAPVAGPKVRERS…
AM218_10575_ALD21570.1	ALD21570.1	CP012623.1	Hymenobacter sp. DG25A	typical catalase Group 3	MDKKPKNTAGGNGNGHTPADGTGTGVTGAGSSQDRRTAPGETGQTLTTRQGHPLTNNQNLRTVGNRGPATLENYQFLEKISHFDRERVPERVVHARGAGAHGVFEAYGKVGNEPIAKYTRAKLFNTKGKQTPVFVRFSTVGHGGHSPETLRDPRGFAVKFYTEDGNWDLVGNNLKVFFIRDAMKFPDLIHSQKPDPVTNRQSGERIFDFICNTPEAMHMVSFLFSPWGIPANYRQMQGSGVNTYKWVNAQGEAVLVKYHWEPLQGIKNLTQAEAEAIQAKNFNHATQDLFDHIKAGKFPEWELCVQIMSDDEHPELDFDPLDDTKIWPQEQFPFLPVGKMTLNRNPENYFAEVEQAAFGTGVLVDGLDFSDDKMLQGRTFSYSDTQRYRVGTNYLQLPI…
AM218_15190_ALD22308.1	ALD22308.1	CP012623.1	Hymenobacter sp. DG25A	typical catalase Group 7	MEESTQPKKLTTASGRPIFDNQNSLSAGARGPLLLQDYFLHEKSAHFNRERTPERVVHAKGSGAYGKFTVTHDITHLTRARLFSKVGNECKMFARFSTVGGEKGSADTERDPRGFALKFYTEDGNWDLVGNNTPVFFVKDPLKFTDFIHTQKREARSNLKSPTMMWDYWSLNPESLHQVTILMSDRGTPYGYRHMHGYGSHTFSLINAENERVWVKFHFRTQQGIRNFSSADATRMKGENPDFAQHDLVEAIDNGDFPKWTMFIQTMTEEQARDFRWNPFDLTKVWPQGEFPLQQVGVMELNQVPANYHAHVEQAAFAPAHVVDGIGYSPDKMLQGRILSYPDAHRYRLGANYEHLPVNACPFGFSNYQRDGQMALGDNGGPGPNYFPNSFDGPVEDKT…
AM352_02895_AVE57406.1	AVE57406.1	CP026697.1	Citrobacter koseri	catalase-peroxidase Group 4	MSMSDDTHNSLSTGKCPFHQGSHDRSAGAGTSSHDWWPNQLRVDLLNQHSNRSNPLGEDFDYRKEFSKLDYSALKGDLKALLSDSQPWWPADWGSYAGLFIRMAWHGAGTYRSVDGRGGAGRGQQRFAPLNSWPDNVSLDKARRLLWPIKQKYGQKISWADLFILAGNVALENSGFRTFGFGAGREDVWEPDLDVNWGDEKAWLTHRHPEALAKAPLGATEMGLIYVNPEGPDHSGEPLSAAAAIRATFGNMGMNDEETVALIGGGHTLGKTHGAAAASHVGVDPEAAPIELQGLGWSSDYGSGAGGDAITSGLEVVWSQTPTQWSNYFFENLFKYEWVQTRSPAGAIQFEAVDAPEIIPDPFDPSKKRKPTMLVTDLTLRFDPEFEKISRRFLNDPQA…
AM352_11520_AVE58960.1	AVE58960.1	CP026697.1	Citrobacter koseri	typical catalase Group 7	MSKKGLTTAAGVPVAHNNNVATAGPRGPMLLQDIWFLEKLAHFDREVIPERRMHAKGSGAYGTFTVTHDISRYTRAKIFSEPGKKTDLFLRFSTVAGERGAADAERDIRGFAIKFYTEEGNWDLVGNNTPVFYLRDPLKFPDLNHVVKRDPRTNLRNPTYKWDFFSHLPESLHQLTIDFSDRGLPFSYRTMHGFGSHTFSFINSDNERFWVKFHLKSQQGIANLMDDEAKRLVADDRESSQRDLYNAIEQGNFPRWKFYVQIMPEAEASQVPYNPFDLTKVWPHGDYPLIEVGVLELNRNPENYFSEVEQVAMNPANVVPGISFSPDRMLQGRLFSYGDAHRYRLGVNHQQIPVNAPRCPFHNYHRDGAMRVDGNSGNGPTYEPNSFGVFQEQPDFSEP…
AM407_15295_AWD04266.1	AWD04266.1	CP028951.1	Klebsiella aerogenes	typical catalase Group 5	MSDKHHDPHSRQAPVHDSDEAKPGLDSLAPEDREWRPTPQPTAPGEEPTAPGSLKAPDTHSIKLDTLEPQRKGGENFPLTTNQGVRIADDQNSLRAGNRGPTLLEDFILREKITHFDHERIPERIVHARGSAAHGYFQPYKSLKEITKADFLSAPEKITPVFVRFSTVQGGAGSADTVRDIRGFATKFYTEEGIFDLVGNNTPIFFIQDAIKFPDFVHAVKPEPHWAIPQGQSAHDTFWDYVSLQPETLHNVMWAMSDRGLPRSYRTMEGFGIHTFRLINAEGKATFVRFHWKPVAGKASLVWDEAQKLTGRDPDFHRRDLWEAIEAGDYPEFELGLQLIPEENEFNFDFDLLDPTKLIPEALVPVQRVGKMVLNRNPDNFFAENEQAAFHPGHIVPGI…
AM407_17215_AWD04633.1	AWD04633.1	CP028951.1	Klebsiella aerogenes	catalase-peroxidase Group 4	MSTSNDPTNNPSAGKCPFHAGTPKQSAGSGTANRDWWPNQLRVDLLNQHSNRSNPLGENFNYREEFKKLDYSALKADLRALLTDSQEWWPADWGSYIGLFIRMAWHGAGTYRTVDGRGGAGRGQQRFAPLNSWPDNVSLDKARRLLWPVKQKYGQKISWADLYMLAGNVALENAGFRTFGFGAGREDVWEPDLDVDWGDEKEWLKHRHPESLEKQALGATEMGLIYVNPEGPNASGDPLSAAAAIRATFGNMAMDDEEIVALIAGGHTLGKTHGAAPASHVGPEPEAAPLESQGLGWSSTYGSGVGADAITSGLEVVWTQTPTQWSNYFFENLFKYEWVQTRSPAGAIQFEAKDAPEIIPDPFDPNKKRKPTMLVTDLTLRFDPEFGKISRRFLNDPQA…
AM429_03475_ASB73015.1	ASB73015.1	CP021896.1	Enterobacter cloacae	catalase-peroxidase Group 4	MSMSDETNNAASAGKCPFHQGGVDHSAGAGTGSKEWWPKQLRIDLLNQHSSRSNPLGEDFDYRKEFSKLDYSALKGDLKALLTDSQPWWPADWGSYAGLFIRMAWHGAGTYRSVDGRGGAGRGQQRFAPLNSWPDNVSLDKARRLLWPIKQKYGQKISWADLFILAGNVALENSGFRTFGFGAGREDVWEPDLDVNWGDEKAWLTHRDPEALAKRPLAATEMGLIYVNPEGPNASGEPLSAAAAIRATFGNMGMNDEETVALIAGGHTLGKTHGAGEATHVGTDPEASPIEAQGLGWASTHGTGIGADAITSGLEVIWSQTPTQWSNYFFENLFKYEWVQTRSPAGAIQFEAVDAPEIMPDPFDPSKKRKPTMLVTDLTLRFDPEFEKISRRFLNDPQA…
AM429_13045_ASB74777.1	ASB74777.1	CP021896.1	Enterobacter cloacae	typical catalase Group 5	MSNNDKPHQSPIHGTEESQPGMDSLAPADGSHKPSPGPSAPGEQPTAPGSMKAPETENEKLKSLDPHRKGGEGHALTTNQGVRIADDQNSLRAGTRGPTLLEDFILREKITHFDHERIPERIVHARGSAAHGYFQPYKSLKEITKADFLSDPNKITPVFVRFSTVQGGAGSADTVRDIRGFATKFYTEEGIFDLVGNNTPVFFIQDAHKFPDFVHAVKPEPHWAIPQGQSAHDTFWDYVSLQPETLHNVMWAMSDRGIPRSYRTMEGFGIHTFRLINAEGKATFVRFHWKPVAGKASLVWDEAQKLTGRDPDFHRRELWESIEAGDFPEYELGLQLIPEEDEFKFDFDLLDPTKLIPEELVPVQLVGKMVLNRNPDNFFAENEQAAFHPGHIVPGLDFT…
AM429_22030_ASB76439.1	ASB76439.1	CP021896.1	Enterobacter cloacae	Mn-catalase Group 03	MFRHVKQLQYTVRVAEPNPGLANLLLEQFGGPQGELAAACRYFTQGLSDDDPGRKDMLMDIATEELSHLEIIGTLVGMLNKGAKGELAEGVENEAELYRSMTENGNDSHITSLLYGGGTPLTNSAGVPWTAAYVDTIGEPTADLRSNIAAEARAKIIYERLINVTDDPGVKDALAFLMTREAAHQLSFEKALQSIRNNFPPGKLPPIEEYTNKYYNMSEGGEVRGSWNSDKHFDYVESPQPAVDGGDGGASVTLTTEQATLVKAMCARTKSDPKADPLTGAELGAGKKKP
AM438_12680_ARA23293.1	ARA23293.1	CP020052.1	Proteus mirabilis	typical catalase Group 7	MEKKKLTTAAGAPVVDNNNVITAGPRGPMLLQDVWFLEKLAHFDREVIPERRMHAKGSGAFGTFTVTHDITKYTRAKIFSEVGKKTEMFARFSTVAGERGAADAERDIRGFALKFYTEEGNWDMVGNNTPVFYLRDPLKFPDLNHIVKRDPRTNMRNMAYKWDFFSHLPESLHQLTIDMSDRGLPLSYRFVHGFGSHTYSFINKDNERFWVKFHFRCQQGIKNLMDDEAEALVGKDRESSQRDLFEAIERGDYPRWKLQIQIMPEKEASTVPYNPFDLTKVWPHADYPLMDVGYFELNRNPDNYFSDVEQAAFSPANIVPGISFSPDKMLQGRLFSYGDAHRYRLGVNHHQIPVNAPKCPFHNYHRDGAMRVDGNSGNGITYEPNSGGVFQEQPDFKEP…
AM586_00225_ALK94945.1	ALK94945.1	CP012640.2	Massilia sp. WG5	typical catalase Group 3	MNEQRPPLTTRQGHPVRDNQSLRSVGERGPATLENYQFIEKITHFDRERIPERVVHARGTGAHGYFEAYGKIGDEPASKYTRARVLNETGVQTPVFVRFSTVIGAKESPETARDPRGFAVKLKTVDGNWDLVGNNLKVFFIRDAIKFPDMIHAFKPDPVTNQQEPWRFYDFICNHPEALHMVTWVKSPWGIPANYREMEGSGVNTYKLVNDQGIAHLVKFHWQPKQGVRNLTAQQAAEIQGQDTSHATRDLYEAIERGEFPEWEFCVQLMSDGEHPELDFDPLDDTKRWPEDRFPLLPVGRMVLNKNPDNVFAETEQSAFGTGVLVDGVDFSDDKMLQGRTLSYSDTQRYRVGPNYLQLPINAPQEGARARTNQRDGQMAYYVDGGGEDKHINYEPSLL…
AM586_03990_ALK95580.1	ALK95580.1	CP012640.2	Massilia sp. WG5	typical catalase Group 5	MTASKKSPGADGAGSVLGTVAGPADASPPSARPHNPVEKRLFEKSVAEKALAAAMPFNPTKAGEHGEAARSPAEGAHHQPSTPAATGSTASEIASSDKVGSGKPQPGSNPTVAPLDRVRVDPADRHLTTNQGVPVADNQNSLKIGLRGPTAMEDFILREKLTHFDHERIPERVVHARGSAAHGFFEAYDDFSALTRATPFAAKGKRTPVFVRFSTVAGERGSTDTARDVRGFAVKFYTEEGNWDLVGNNIPVFFIQDAMKFPDLVHAAKPEPHHAMPQAATAHDTFWDFVGLSPESAHMLMWTMSDRAIPRSYRTMQGFGVHTFRLVNAEGESRFVKFHWNPTAGTHSLVWDEAVRISGADPDFHRRDLWEAIESGNFPEWELGLQVFTEEEAASFGFD…
AM586_04290_ALK95622.1	ALK95622.1	CP012640.2	Massilia sp. WG5	typical catalase Group 7	MTILTTASGIPVADNQNSITAGPRGPVLLQDFHLIEKLQHFNRERIPERVVHAKGSGAYGSFTVTHDITRYTTAKLFSEIGKRTETFLRFSTVGGEKGSADTERDPRGFALRFYTEDGNWDLVGNNTPTFFLKDGIKFPDFIHTQKRDPQTNLKSAQNMWDFWSKAPESLHQVTILFSGRGTPDGYRHMDGFGSHTYSLIDDEGRRVWVKWHFKTLQGIKNLSAPEAVRLAGADPDYAQRDLFNAIANGDYPRWSVEIQVMDDEQRAAWEARTGWDAFDLTKVWPQGDFPRIKVGILELNRNPDNYHLDVEQAALSPSNIVPGMGYSPDKMLQARLFAYHDAQLYRVGTNHQHLPVNRPRCPFHNQQRDGAMAIANGGASANYDPVRADTPAAGGFGHG…
AMC99_00260_ALE15576.1	ALE15576.1	CP012669.1	Altererythrobacter epoxidivorans	catalase-peroxidase Group 3	MDAKTGEMSGGCPFHGDGGTRALFGRTNKDWWPDALDLSILTQEGKSVDPLGEDFDYCEAFNAIDYDALKADLTALMTDSQEWWPADYGHYGPFFIRMAWHAAGTYRTSDGRGGAGSGQQRFAPLNSWPDNGNLDKARRLLWPIKQKYGNHISWADLFVLTGNVAIESMGGPTFGFGGGRKDVYEPETVYWGTEDLWVDQGAETRIIPDEGKALETPLAAIQMGLIYVNPEGPGGNPHDDEGMARDMRETFARMAMNDEETVALTAGGHTFGKAHGAVPADQLSGSPESEALELMGFGWATDADQIGEGHITTSGIEGAWTNTPDKWTENYFRLLLDYDYELVQSPAGANQWQPINPKEEDMAPDARDPSKKVPTMMTTADMQLKRDPEYRKISERFRN…
AMETH_2570_AIJ22662.1	AIJ22662.1	CP009110.1	Amycolatopsis methanolica 239	Mn-catalase Group 10	MFRHTKLLQFEAKPERPDPYYARKLQELIGGAYGEMTVTMQYLFQGWNCRIEGKYKDLIMDTATEEIGHVEMLATMVARLLEGAPATATAEAAQDPVMAAVLGGMDPQQAIVAGGGAVPADSNGTPWNGKYIVASGNLLADFRANAAAEAQGRLQTARLYNMTDDPGVKEMLKFNLARDTVHQKQWLRAIEELQADGLESDIAPGALLDEEDQTHNNTIWHLSDGPDGNKGTWSTGEDRIEYLMDPKPLGGPGSAPKPDPELYATYSPTQDAMGTVKGKAQSAVNKVT
AMETH_3599_AIJ23691.1	AIJ23691.1	CP009110.1	Amycolatopsis methanolica 239	catalase-peroxidase Group 4	MSDTQDNTPSSAQGVDKKAAAGCPVAHDSVTSHGSESENPAIDSPTPKSSGRPRTNRDWWPNQLDLSVLHAHDSKSNPLGKDFNYAKEFAKLDVDALKRDIEQVLTTSQDWWPADFGHYGGLMIRMSWHSAGTYRIHDGRGGAGDGAQRFAPLNSWPDNANLDKARRLLWPVKQKYGQKISWADLLVLAGNVALESMGFKTFGFGFGREDVWEAEEVYWGPEDDWLGDERYVTDSEMVPELGATEMGLIYVNPEGPRGSADYMAAAHFIRETFGRMAMNDEETVALIAGGHTFGKTHGAGIADDHVGPEPEAAPLEAQGLGWLSTHGSGKGPDTITSGLEVTWTDKPTQWSNRFFEILFGYEWELTTSPGGAKQYVAKDAPEIIPDPYDPNKKHKPTML…
AMETH_4526_AIJ24618.1	AIJ24618.1	CP009110.1	Amycolatopsis methanolica 239	catalase-peroxidase Group 4	MPENPDTHVYRTYDKVLSETGPARRRRDRGARVADWWPDRVDLAPLRRNPAGGNPLGPDFDYAAAFESIDLDELARDVDEVLTTSQDWWPADFGHYGPLVLRMAWHSAGTYRVFDGRGGAAAGMLRFAPLNSWPDNRNLDKAVRLLWPVKQKYGRRISWADLIVFAGNRALESMGFTTFGFGGGRVDVWEPDGTYWGPERKWLAEERYAGLRELDEPLAATAMGLIYVDPQGPATNPDPVLSARDIRETFRRMGLDDEETVALIGGGHTFGKTHGRADPNTTIGPEPEAAPLTAQGLGWIGSFGTGKGPDTVTTGLEGMWTRTPVRWDHTFFETLYAYEWDVELSPAGLWQWIPSGGEGEDTIPDPYDPDVKHHPVMLTTDLALQQDPEYDKIARRYLE…
AMETH_6661_AIJ26753.1	AIJ26753.1	CP009110.1	Amycolatopsis methanolica 239	typical catalase Group 6	MTKPTTNNVGIPVASDNDSLTLGANGPILLQDHYLIEKNAHFNRERVPERVVHAKGGGAFGFLEVTEDVSQFTKAAVFQPGTRTESLIRFSSVAGENGSPDTWRDPRGFAVKLYTTQGNYDIVGNNTPVFFIRDPIKFPDFIHSQKRRADNHLRDHNIQWDFWTLRPESAHQVTWLMGDRGIPSNWREMDGFGSHTYLWENAGGEKFWVKYHFKTDQGIGYLTQADADRIAGEDADYYIRDLWTAIERGDHPSWTLYVQVMPYEEAADYRFNPFDLTKVWPHGDYPLIKVGRYVLDRNPSNYFAEIEQAAFSPANMVPGIGPSPDKMLQGRLFAYPDAHRYRIGANFAQLPVNAPKSPVNSYSRDGAMRYQNPGDPVYAPNSFGGPHADAAYAGETVSS…
AMIS_37880_BAL89008.1	BAL89008.1	AP012319.1	Actinoplanes missouriensis 431	typical catalase Group 5	MPEPTLPSPAALDPADSTPLKASLAPERGLQTGEYLTSGQGVRLPDTDHSLKAGTRGPTLMEDFHLREKITHFDHERIPERVVHARGTGAYGVFTAYGNAASITRAGFLAEKNKQTEVFVRFSTVLGSRGSADTVRDTRGFATKFYTDEGNFDLVGNNMPVFFIQDGIKFPDLIHAAKWHPDREIPQAQTAHDTFWDFVSLHTEATHHVMWAMSDRAIPRSYRTMEGFGVHTFRLVNAAGETALVKFHWKPVAGVHSLAWEEAQIAAGVDPDFHRRDLTDSIDAGLFFEYELGVQVMPDTPDETFQGIDLLDPTKIVPEELAPVQPIGKLVLNRNTDNFHAETEQIAFHMGNLVPGIEVTNDPLLQARLFSYLDTQLSRLGGPNFNQLPINRPHAPVND…
AMIS_45620_BAL89782.1	BAL89782.1	AP012319.1	Actinoplanes missouriensis 431	catalase-peroxidase Group 4	MSDAQDSGTGKCPVAHDSVTAHGSESENPAIDSPTPKTGGRPRTNRDWWPNQLDLSVLHAHSAKGNPLGPDFEYAKEFAKLDVEALKRDLVELMTTSQDWWPADFGHYGGLMIRMSWHAAGTYRIQDGRGGAGDGGQRFAPLNSWPDNANLDKARRLLWPVKAKYGQKISWADLLVLAGNVAMESMGFETFGFGFGRVDVWEPEEIFWGPEDTWLGDERYASEKTMAEGVGATEMGLIYVNPEGPRGNADPLAAAHFIRETFARMAMNDEETVALIAGGHTFGKTHGAAPADNHVGAEPEGAPLEAQGLGWLSTHGSGKGKDTITSGLEVTWTDKPTQWSNRFFEILFGYEWELTTSPAGAKQWVAKTTDEIIPDAFDPSKKHRPTMLTTDLSLRVDPA…
AMIS_47330_BAL89953.1	BAL89953.1	AP012319.1	Actinoplanes missouriensis 431	Mn-catalase Group 10	MFKHVDHLQFQAKPEKPDAFFAAKLQELVGGQFGEMTVMMQYLWQGWSCRVPGKYKDMIMDIATEEIGHVEMLTTMLARLLEGGPAEATEKAAAANPVLAAVLGGQNPQHAVVTGGGAMPTNSQGVPWNAGYIVASGNLLADFRSNVAAEAQSRLQTSRIYNMTDDRGVKDMLQFNLARDTYHQQQWLLGIEQLIADGFTESGIEDSNAEFEHPEANHTFYSFDPESRAGEGRWAQGPTLNGKDQIVYVPDAQPLTDDKPLGPAPDPKLFVTYDGSMGKGKPGTGAGAHVQGVANVVNKIKGALD
AMK03_PE00005_ANM44054.1	ANM44054.1	CP013600.1	Rhizobium sp. N741	catalase-peroxidase Group 4	MDNPTDSTGKCPVAHGNTPRGRSNRDWWPNQLNVQILHHNSGRADPMGKDFDYAEEFKKLDLDALKKDLHALMTDSQDWWPADFGHYGGLFIRMAWHSAGTYRITDGRGGAGQGQQRFAPLNSWPDNANLDKARRLLWPIKQKYGNRISWADLLILTGNVALESMGFKTFGFAGGRADVWEPEELYWGPEGTWLGDERYSGERQLSEPLGAVQMGLIYVNPEGPNGNPDPVAAARDIRETFARMAMNDEETVALIAGGHTFGKTHGAGDPSFIGPEPEGGAIEDQGLGWKSSFGTGVGKDAITAGLEVTWSQTPTRWSNHFFENLFAHEWELTKSPAGAHQWRAKNAEASIPDAYEPGKKHVPTMLTTDLSLRFDPIYEKISRRFLENPGEFADAFARA…
AMK04_PD00005_ANM37904.1	ANM37904.1	CP013594.1	Rhizobium sp. N871	catalase-peroxidase Group 4	MDNPTDSTGKCPVAHGNTPRGRSNRDWWPNQLNVQILHHNSGRADPMGKDFDYAEEFKKLDLDALKKDLHALMTDSQDWWPADFGHYGGLFIRMAWHSAGTYRITDGRGGAGQGQQRFAPLNSWPDNANLDKARRLLWPIKQKYGNRISWADLLILTGNVALESMGFKTFGFAGGRADVWEPEELYWGPEGTWLGDERYSGERQLSEPLGAVQMGLIYVNPEGPNGNPDPVAAARDIRETFARMAMNDEETVALIAGGHTFGKTHGAGDPSFIGPEPEGGAIEDQGLGWKSSFGTGVGKDAITAGLEVTWSQTPTRWSNHFFENLFAHEWELTKSPAGAHQWRAKNAEASIPDAYEPGKKHVPTMLTTDLSLRFDPIYEKISRRFLENPGEFADAFARA…
AMOL_0506_AXX91522.1	AXX91522.1	CP032098.1	Arcobacter molluscorum LMG 25693	catalase-peroxidase Group 3	MARCPITGLGSDDAVVNPAVSNKGTYNKDWWPNQLNLKILSLHNNKVNPMGEDFDYAKEFEKLDYEALKKDLTVLMTDSQEWWPADYGHYGPLFIRMAWHSAGTYRIGDGRGGSSTGNQRFAPLNSWPDNANLDKARRLLWPIKQKYGNQISWADLMILAGNVALESMGFKTFGFAGGRVDIWEPEEDIYWGNEDEWLGDDRYDKNKHISEDLENPLAAVQMGLIYVNPEGPNGEPNVLESAKDIRETFARMAMGDKETVALIAGGHTFGKCHGAGDPQNVGAEPEAEGLIAQGLGWLSKFLSGKGNDTITSGIEGSWTANPTQWDNGYFDVLFAYDWNLEKSPAGAWQWAPVNPKEEHLAPSAHDSSKKVKTMMTTADMAMRMDPIYGPISKRFHENP…
AMRN_0493_AXX86261.1	AXX86261.1	CP032101.1	Arcobacter marinus	typical catalase Group 7	MKKTMTTTAGNPISDNQNSITAGERGPVLMQDYQLIEKLAHQNRERIPERVVHANGSAAYGKLVITEDISKYTKAKVLQKSEETKLLLRFSTVAGERGAADAERDVRGFALKFYTKEGNWDLVGNNTPVFFVRDAYKFPDFIHTQKRHPQTNLRSNTAAWDFWSLSPESLHQVTILMSNRGLPKSYRHINGYGSHTYSLINEKNERFWVKFHFKTMQGIETITDKEAEEIVGKDRESNQRDLFENINQGNYPKWSFEIQIMTEEEALACSFNPFDLTKVWPHSDYPMIKVGELTLNENPKNYFNEVEQASFSPSNVVAGIGFSPDKMLQARIFSYPDAHRYRVGTHYEMLPVNRPIVDVKTYHADGAMNYDQKDISDAYYEPNSFDGPVEDKAFEEPAL…
AN232_03210_AWS94310.1	AWS94310.1	CP029727.1	Citrobacter sp. CRE-46	catalase-peroxidase Group 4	MSMSDDSQNASTAGKCPFHQGGPDHSAGAGRNNRDWWPNQLRVDLLNQHSNRSNPLGEDFDYRKEFSKLDYSALKGDLRALLSESQPWWPADWGSYAGLFIRMAWHGAGTYRSIDGRGGAGRGQQRFAPLNSWPDNVSLDKARRLLWPIKQKYGQKISWADLFILAGNVALENSGFRTFGFGAGREDVWEPDLDVNWGDEKAWLTHRHPEALAKTPLGATEMGLIYVNPEGPDHSGEPLSAAAAIRATFGNMGMNDEETVALIGGGHTLGKTHGAAAASHVGADPESAPIEAQGLGWASSYGSGAGADAITSGLEVVWTQTPTQWSNYFFENLFKYEWVQTRSPAGAIQFEAVDAPEIIPDPFDPEKKRKPTMLVTDLTLRFDPEFEKISRRFLNDPQA…
AN232_19305_AWS97210.1	AWS97210.1	CP029727.1	Citrobacter sp. CRE-46	typical catalase Group 5	MSQKDKHPLHHTAPVHDASESKPGLDSLAPADGSHRPTPEPTPPGMQPTTSGSLKAPDIRSDKLNALDSFRKGSEEFALTTNQGVRIADDQNSLRAGNRGPTLLEDFILREKITHFDHERIPERIVHARGSAAHGYFQSYTDLSATTKADFLSAENKITPVFVRFSTVQGGAGSADTVRDIRGFATKFYTEEGIFDLVGNNTPIFFIQDAHKFPDFVHAVKPEPHWAIPQGQSAHDTFWDYVSLQPETLHNVMWAMSDRGIPRSYRTMEGFGIHTFRLINAQGKATFVRFHWKPLAGKASLVWDEAQKLTGRDPDFHRRDLWEAIEAGDYPEYELGLQLIPEEDEFKFDFDLLDPTKLIPEELVPVQRVGKMVLNRNPDNFFAENEQAAFHPGHIVPGI…
AN401_18955_ATG75669.1	ATG75669.1	CP012621.1	Zobellella denitrificans	catalase-peroxidase Group 3	MSQHSNSASGKCPVMHGAHTAAGASNMDWWPKALNLDILHQHDTKTNPLGEDFDYAEEFKKLDLGAVKQDLRALMTDSQDWWPADWGHYGGLMIRMAWHAAGSYRIADGRGGAGTGNQRFAPLNSWPDNGNLDKARRLLWPIKKKYGNRLSWADLIILAGNMAYESMGLKTFGFGGGRADIWHPEKDIYWGSEKEWLQPSGGPNSRYSGERDLENPLAAVMMGLIYVNPQGVDGNPDPLRTAKDVRETFARMAMNDEETVALTAGGHTVGKAHGNGDAANLGPEPEAAGLEEQGLGWMNHQTRGVGRDAVTSGLEGAWTTHPTRWDNGYFKMLLEHEWELKKSPAGAWQWEPVDIKEEDMPVDVEDPSIRRKPIMTDADMAMKMDPEYRKIAERFHQDP…
AN416_05145_ALP62049.1	ALP62049.1	CP013102.1	Paraburkholderia caribensis	typical catalase Group 7	MSERNLTTASGAPVADNQNSLTAGPRGPVALQDVWLIEKLAHFDREVIPERRVHAKGSGAFGTFKVTHDISRYTKAKVFAQVGKETPLFMRFSTVAGERGAADAERDVRGFSIKFYTEEGNWDVVGNNTPVFFIRDPLKFPDFIHTQKRDPYTNMRSATNAWDFFSYHPESLHQVTILMSDRGIPKNYRQMHGFGSHTYSFINADNERFWVKFHFKSMQGVENYTDQEAAQVVARDRESGQRDLVGSIDEGNFPKWRFQIQVMPEADAAQYRYNPFDVTKVWPHKDYPLIDVGVIELNRNAQNYFSDVEQAAFTPANVVPGIGFSPDRLLQGRLFSYGDTQRYRLGVNHHLIPVNASRAPNVRSFHRDGGMRVDGNLGGNVNYEPNRFGDFAQDRNAIE…
AN416_18825_ALP64710.1	ALP64710.1	CP013103.1	Paraburkholderia caribensis	typical catalase Group 5	MANRQRNQQPSAPAEDLKSKDLERSRVRPQNEALRTNQGVKIADNQNTLRAGPRGPSLLEDFIMREKITHFDHERIPERIVHARGSAAHGVFQVYEPMAEYTKAAFLQDPSVQTPVYVRFSTVQGPRGSADTVRDVRGFATKFYTSEGNYDLVGNNMPVFFIQDAIKFPDFVHAVKPEAPNEMPTGASAHDTFWDFVSLVPEATHMVLWTMSDRAIPRSLRTMEGFGVHTFRFINAQGKMRFVKFHWRPVLGSYSLLWDEAQKLAGKDPDFHRRDLWEAIERGDYPEFELGVQIIEEKDQDSFGFDLLDPTKLVPEEIVPVKIIGKMTLNRNPDNFFAETEQVAFHPGHVVPGIDFSNDPLLQGRLFSYTDTQISRLGGPNFHEIPINRPVSPNVNNQR…
AN416_21030_ALP65094.1	ALP65094.1	CP013103.1	Paraburkholderia caribensis	typical catalase Group 7	MNKLTTAFGAPVVDNQNIQTAGPRGPALLQDVWFLEKLAHFDREVIPERRMHAKGSGAFGTFTVTHDISKYTRAKIFSQIGKKTELFARFSTVAGERGAADAERDIRGFAVKFYTDEGNWDLVGNNTPVFFLRDPLKFPDLNHAIKRDPRSGLRSAESNWDFWTQLPEALHQVTIVMSDRGIPKSFRHMHGFGSHTFSFINADKERFWVKFHLHTQQGIQNLSDAEATALVGADRESSHRDLYESIERNEFPKWTMYVQVMPEADASKTSYNPFDLTKIWPKKDYPLIEVGVMELNRNADNHFADVEQSAFNPANVVPGISFSPDKMLQGRLFSYGDAQRYRLGVNHSLIPVNAPRCPVHSYHRDGSMRVDGNMGGATPYNPNTRGEWLDQPDFSEPPL…
AN416_35025_ALP67805.1	ALP67805.1	CP013104.1	Paraburkholderia caribensis	catalase-peroxidase Group 4	MSNDAKCPFIHAAGGGTTNRDWWPKQLRLDLLSQHSSRSNPLDKDFDYAEAFRSLDLAAVKKDLAALMTDSQDWWPADFGHYGPLFIRMAWHSAGTYRTGDGRGGGGRGQQRFAPLNSWPDNVSLDKARRLLWPVKQKYGQKISWADLLILSGNVALETMGFKTFGFAGGREDTWEPDQDVYWGNEKTWLGGDVRYGKGAAPRDASDEGVLVADEELHGEEASRTDSGRHLENPLGAVQMGLIYVNPEGPDGNPDPLAAAHDIRETFARMAMNDEETVALIAGGHTFGKTHGAGPADNVGAEPEAAELENQGLGWKSSFGSGKGGDTITSGLEVTWTATPTQWGMGFFQNLFGHEWELTKSPAGANQWVAKGATATIPHAHDPSKKLLPTMLTTDLSLR…
ANTHELSMS3_02427_ASP21093.1	ASP21093.1	CP022540.1	Antarctobacter heliothermus	catalase-peroxidase Group 3	MDGNDIGAGKCPVMHGAITETGTTVTDWWPKSLNLDILHQHDTKTNPLGQDFDYRTEVKSLDFDAIKADVKALMTESQDWWPADYGHYGGLMIRLAWHSAGSYRLADGRGGGGAGNIRFAPLNSWPDNGNLDKARRLLWPVKKKYGNKVSWADLILLAGTMAYESMGLKTFGFSFGREDIWAPEKDVYWGAEREWLAPSDERYADVGKPDTMDNPLAAVQMGLIYVNPEGVNGVPDPFKTAAQVRETFARMAMNDEETAALTCGGHTVGKAHGNGDAGALGAEPEGADVEAQGFGWINTNLGGKAANAVTSGIEGAWTTEPTKWDMGYFKLLFGYEWELTKSPAGANQWRPVNIKEEDMPVDPSDATKRVMPMMTDADMAMKMDPTYNAICQKFMADPA…
ANTHELSMS3_04140_ASP22744.1	ASP22744.1	CP022540.1	Antarctobacter heliothermus	catalase-peroxidase Group 3	MDGNDMRQGGGCPVMHGATNTSGRSNRDWWPNQLNLAILHQHGPASNPMPAGFDYAEAFKALDLDAVKADLTALMTDSQDWWPADYGHYGPFFIRMAWHSAGTYRTADGRGGASTGSQRFAPLNSWPDNGNLDKARRLLWPIKEKYGNALSWSDLMILAGNVAIESMGGKTFGFAGGREDIWAPEEDIYWGAEGEWLATSDKANSRYSGDRALENPLAAVQMGLIYVNPEGPDGNPDPLASGRDIRDTFGRMAMNDEETVALVAGGHTFGKAHGAGDPGLVGSEPEACGLQDMGFGWKNTHKTGKGADTTTSGIEGPWTANPIQWDMGYFDVLFGYDWALTKSPAGAHIWHAQKLRDIDHAPQVDGSAAKVPVMMTTADMAMRMDPIYGPISKRFHENP…
AO058_08530_APS38915.1	APS38915.1	CP012872.1	Salegentibacter sp. T436	catalase-peroxidase Group 4	MEKNDHRNHPDNHKVWEVNESSRCPFMGGALDKTAGSGTSNRDWWPNQLNLSILRQHSNLSNPMDEDFNYAEEFKSLDLKAVKKDIFKLMEDSQEWWPADYGHYGPFFIRMAWHSAGTYRIGDGRGGASSGSQRFAPLNSWPDNANLDKARLLLWPIKEKYGRKISWADLMILTGNCALESMGLETFGFGGGREDIWEPEEDIYWGSEGEWLGNKERYSENNELESPLGASHMGLIYVNPEGPNGNPDPVAAAKDIRETFGRMAMNDYETVALIAGGHTFGKTHGAGDAEQYVGAEPAGSAIEEMGLGWKNSMGKGNAEDTITSGIEGAWTNTPTKWSNSFFDNLFKYDWECIKGPGGAYQWKPKDNAGAGTIPDAHDPSKSHAPFMLTTDLSLKEDEA…
AO058_12140_APS39583.1	APS39583.1	CP012872.1	Salegentibacter sp. T436	typical catalase Group 5	MKDDGKKKASKNKKHEDLEKNREDGQEQFLTTNQGVRINDNQNSLKAGDRGASLLEDFILREKITHFDHERIPERIVHARGSGAHGYFQVYESMEKYTKAGFLQDPSKKTPVFTRFSTVAGFKGSTDLARDVRGFSVKFYTEEGNYDLVGNNIPVFFIQDAIKFPDLIHAVKPEPHNEIPQAASAHDTFWDFVSLMPESMHMIMWAMSDRAIPRSLRMMEGFGVHTFRFVNKEGKGTFVKFHWKPLLGTHGVAWDEAQKISGNDPDFHRRDLWEAIENGQFPEWELGVQLIPEEDEHKFDFDLLDATKLVPEEMVPVKKIGKMVLDRNPDNFFAETEQVAFHPGHIVPGIDFTNDPLLQGRLFSYTDTQLKRLGGPNFHEIPINRPIAPMHNNQRDGHM…
AO080_12005_ALI34163.1	ALI34163.1	CP012875.1	Weissella cibaria	Mn-catalase Group 08	MYIRKSKLQYHAKPEKSNPIIARRLQEILGGQWGETTGMLAYTLQGWNTVGNEKYKDLLLDTGTEEIGHMEMLATMINDLLRDAPTDTIEELARNSDPATAAILGGMDPQHAFVNGLGAGLSDSNGNPWSANFIISSGNLLADMRFNVVRESQARLQVSRNFLQTEDKGVRDMLSYLMARETQHQLQFLKACEELEEKYGPVVPHGTQDLQKQGEEFTHTLYNFSEGEASQALEGETARDGNKFHYSSDPIMAGGEPDLTAAPEILRNTPPEDPSTAVEEGRRMLEGEQNTSK
AO080_12060_ALI34173.1	ALI34173.1	CP012875.1	Weissella cibaria	Mn-catalase Group 08	MYIRKSKLQYHAKPEKSNPIIARRLQEILGGQWGETTGMLAYTLQGWNTVGNEKYKDLLLDTGTEEIGHMEMLATMINDLLRDAPTDTIEELARNSDPATAAILGGMDPQHAFVNGLGAGLSDSNGNPWSANFIISSGNLLADMRFNVVRESQARLQVSRNFLQTEDKGVRDMLSYLMARETQHQLQFLKACEELEEKYGPVVPHGTQDLQKQGEEFTHTLYNFSEGEASQALEGETARDGNKFHYSSDPIMAGGEPDLTAAPEILRNTPPEDPSTAVEEGRRMLEGEQNTSK
AO498_09110_AMQ56576.1	AMQ56576.1	CP012836.1	Algoriphagus sp. M8-2	catalase-peroxidase Group 4	MDSHHGNGGDISKCPFHNGSMAAAAGKGQQNVDWWPNQLKLNILRQHSSLSNPMEEGFDYAKEFESLNLAEVKADIEKVLTTSQDWWPADYGHYGPFMIRMAWHSAGTYRVQDGRGGAGTGTQRFAPLNSWPDNANLDKARLLLWPVKQKYGKKLSWADLMILTGNVALESMGFKTFGFGGGRADVWEPEQDIYWGSEKEWVAHRNPEALENPLGATEMGLIYVNPEGPNKVPDPVLAAKAIRETFGRMAMNDEETCALIAGGHTFGKTHGAADPGKYVGAEPAGASIEEMSTGWNSTYGTGHGADTITSGLEGAWTSTPAKWGHDYFKFLFEYEWELTTSPAGAHQWVAKNAEAIIPDAHIPGKFHKPFMLTTDLSMRFDPDYEKVSRKFYEDPEYFA…
AOA14_01380_AMU93251.1	AMU93251.1	CP013342.1	Sphingopyxis terrae NBRC 15098	catalase-peroxidase Group 3	MNDQTPIDAAGGCPVHKGGMRALLGRTNKDWWPDMLATDILTPNGPSNPMGEDFDYAEAFKSLDYQALKDDLTALMTDSQPWWPADYGHYGPFFIRMAWHAAGTYRTADGRGGANSGQQRFAPLDSWPDNGNLDKARRLLWPIKQKYGNKISWADLFILTGNVAIESMGGPVFGFGGGRVDVYEPERDIYWGSEDKWVNEGVQTRIDPKHGFEVIEGPLAAIQMGLIYVNPEGPQGNPHDDEGMARDMKETFARMAMNDEETVALTAGGHTFGKAHGNGDASKLGAAPAGGDLAAQGFGWVSGEEHGGIGEHAVTSGIEGAWTNTPDKWTENYFRLLFDYDYELVKSPAGANQWQPIGQKEEDMAPAAWDPNIKVPTMMTTADMALKRDPEYRKISERF…
AOA14_04505_AMU93863.1	AMU93863.1	CP013342.1	Sphingopyxis terrae NBRC 15098	typical catalase Group 5	MAKKSAPSPATDHALRDHQPGERQIEQADSRGNGYELHQAVADGVADASAYLTDNFGHRISDNQNSLRAGERGPTLLEDFVLREKIFHFDHERIPERIVHARGSGAHGVFECTKAIPGLTKASILQKEGATCPVFARFSTVAGGAGSVDTPRDVRGFAVKLYTDSGNWDLVGNNIPVFFIQDAMKFPDLVHSVKMEADRGYPQAASAHDTFWDFIGLMPEAMHMIMWAMSDRAIPRSFRMIEGFGVHTFRFVNDDGEGKFVKFHWKPVLGIQSTTWDEAVKIAGADPDFLRRDLFEAIEAGDFPAWDLGVQVFDEAFAEKQPYDVLDATKLIPEEDIPVDIVGRMTLNRNVDNFFAETEQVAFLPSNIIPGIDFSNDPLLQGRLFSYLDTQKSRLGTTN…
AOB58_1643_ANK38445.1	ANK38445.1	CP012968.1	Staphylococcus sp. AntiMn-1	typical catalase Group 5	MSNKKKDQLNEVEKNNDDKAMTTNNGVKVSEDENTLTVGERGPSLLEDFHFREKIMHFDHERIPERVVHARGFGAHGEFQVYEDLSKYTSADFLTHPEKTTPVFVRFSTVQGSKGSPDTVRDVRGFATKFYTDEGIFDLVGNDIPVFFIQDAIKFPDLIHAVKPEPHNEMPQGGTAHDTFWDFFAQNPESTHTAVWAMSDRGIPKDFRQVEGFGVHTFRLVNNEGQSYFVKFHWKPLQGLESLVWDEAQMLHGKDVDFHRKDLYESIEKGDYPEWELGLQIIRPEQEFDFDFDILDPTKIWPEDDVPVQRVGKMTLNQNVTNVFDETEQAAFHPGHIVPGIDFSNDPLLQGRLFSYTDTQITRLGGPNFNQIPINRPVNEVHNNQREGMHQTSVNKGQV…
AOB58_1707_ANK38509.1	ANK38509.1	CP012968.1	Staphylococcus sp. AntiMn-1	typical catalase Group 7	MSKKLTGLFGAPVGDRENSMTAGPRGPLLMQDIYFIEQMAHFDREVIPERRMHAKGSGAFGTFKVTNDITQYTCASIFSEVGKETEMFARFSTVAGERGAADAERDIRGFALKFYTDEGNWDLVGNNTPVFFFRDPKLFASLNHVVKRNPKTNMRDPQANWDFWTLLPEALHQITIVMSDRGIPKGFRNMHGFGSHTYSMYNDKGERVWVKFHHRTQQGIENYSPEEAAQVIANDRESSQRDLFGNIEEGNFPKWKMYIQVMTEEQARNHKDNPFDLTKVWYKDEYPLIEVGEFELNRNPENYFQDVEQAAFAPTNIVPGLDFSPDKMLQGRLFSYGDTQRYRLGANHWQIPVNQPKGVGVENICPFSRDGQMRILDNNQGGGTHYYPNSNGALEDQPQ…
AOB58_606_ANK37408.1	ANK37408.1	CP012968.1	Staphylococcus sp. AntiMn-1	typical catalase Group 7	MSNDKKLTSLFGAPVSDRENSMTAGPRGPLLMQDWYFLEQMAHFDREVIPERRMHAKGSGAFGTFTVTNDITKYTSASIFSEVGKQTEMFARFSTVAGERGAADAERDIRGFALKFYTDEGNWDLVGNNTPVFFFRDPKLFASLNHAVKRDPRTNMRSSQNNWDFWTSLPEALHQVTILMSDRGIPKGFRNMHGFGSHTYSMYNDKGERVWVKFHHRTQQGIENLQPEEAASVIANDRESSQRDLFEAIENKDYPKWKLYIQVMTEEQARNHKDNPFDLTKVWYKGDYPLIEVGEWELNRNPDNYFQDVEQAAFAPTNIVPGLDFSPDKMLQGRLFSYGDTQRYRLGANHWQIPVNQPKGVGVENICPFSRDGQMRILDNNQGGGTHYYPNSDGSFEDQ…
AOC03_03425_ALF59218.1	ALF59218.1	CP012678.1	Psychrobacter urativorans	typical catalase Group 5	MNKNIDHTDPAKDMNTEQGHGGETHQRAGDDAKALTTQQGVVISDNQNSLKVGARGPTLLEDFVLREKINHFDHERIPERIVHARGSAAHGYFELTESLEEYTTAKILSETGKQTPLFTRFSTVAGSKGSKDTPRDVRGFAVKIYTEEGNWDIVGNNMPIFFIQDAMKFPDLVHAVKPEPDRGFPQAASAHDTFWDFVSLSPETMHNLIWVMSDRGLPRSLRMMEGFGIHSYRLINKEGKSTFVRFHWKPVLGVQSTTWDEAVKISGADLDYHRRDLFESINNGDYPEWEFGVQLFTEDEANEFPFDHLDATKLIPEELVPVKIVGKMVLNRYPDNFFAETEQVAFCPSHLPPGIDFSNDPLLQGRLFSYLDTQLSRLGSPNFAQIPINAPKCPFANNQ…
AOC03_09200_ALF60190.1	ALF60190.1	CP012678.1	Psychrobacter urativorans	typical catalase Group 7	MSDKKCPYAPTQLTMGNGAPVADNQNSLTAGKRGPLLAQDIWLNEKLANFAREVIPERRMHAKGSGAFGTFTVTNDITQYTRAKIFSEVGKQTEMFARFSTVAGERGAADAERDIRGFALKFYTEEGNWDMVGNNTPVFFLRDPRKFPDLNKAVKRDPRTNMRSATNNWDFWTLLPEALHQVTIVMSDRGLPASYRNMHGFGSHTYSFWNTAGERFWVKFHFRTQQGIKNLTDAEAADIVGSDRESHQKDLYDAIENSDFPKWKMYVQIMPEAEADTVPYHPFDLTKVWPKGDYPLIEVGEFELNKNSDNYFVDVEQAAFAPSNLVPGISVSPDKMLQNRLINYADAQRYRVGVNHQQIPVNKPRCPVMSNHRDGEGRVDDNYGSRPHYEPNSFSQWQE…
AOC05_13340_ALE93067.1	ALE93067.1	CP012677.1	Arthrobacter alpinus	typical catalase Group 7	MTIENTAPLTTAAGAPVANNQDSLTAGPRGPMLLQDVWFLEKLAHFSREVIPERRMHAKGSGAFGTFTVTNDITKYTKANIFSEVGKQTEMFARFSTVAGERGAADAERDIRGFSVKFYTDEGNWDLVGNNTPVFFFRDGLKFPDLNRAVKRDPRTNMRSAENNWDFWTNLPESLHQVTIVMSDRGIPNGYRHMHGFGSHTFSLINAEGERFWVKFHHVTQQGIENLTDEEAGALVAADRESSQRDLFDSIENGDFPKWKLMVQIMPEADADTYKYHPFDLTKVWSKTDYPLIEVGEWELNRNAENYHADVEQAAFAPANVVPGISFSPDRMLQARLFSYGDAQRYRLGVNHHQIPVNAAKNPTNTYHRDGQGRVDGNQGRTPGIEPNSYGRWAEQPAY…
AOC05_18095_ALE93792.1	ALE93792.1	CP012677.1	Arthrobacter alpinus	typical catalase Group 5	MTNPKENIPGAPSVQTPKLEEPTEPRKPVPPKPDQHGPELVSPTGTPTGEPEGSRAQAGDYLTTAQGGRLADTNHSLKAGRRGPTLLQDHHLREKITHFDHERIPERVVHARGAGAHGVFESYGTGTGLSKAGFLAAGVETPVFVRFSTVVGSRGSADAVRDTRGFAVKFYTDEGTFDLVGNNIPVFFIQDAIKFPDVVHAAKPHPDREIPQAQSAHDTFWDFVSLHTEAQAHTIWFMADRGIPRSFRMMEGFGVHTFRLINEEGKSTLVKFHWKPAQGVHSLVWEEAQIVNGMDPDFHRRDLADAIESGNYPSWELGVQVFPDTDDEMFEGIDLLDPTKFVPEELAPVQMLGRMTLNANPKNYFAEVEQVAFHPGHLVPGIDVTNDPLLQGRLFSYLD…
AOC25_11615_APC02215.1	APC02215.1	CP015017.1	Polynucleobacter asymbioticus	catalase-peroxidase Group 3	MTSKGMCPVAHGANTEASETPMAWWPKALNLDILHQQDTKTNPMGSSFSYRDELKKLDVGALKKDMKDLLTNSQDWWPADWGHYGGLMIRMAWHSAGSYRIADGRGGAGTGNQRFAPINSWPDNANLDKARRLLWPIKKKYGNKISWADLMILAGTIAYESMGLKTFGFSFGREDIWHPEKDIYWGSEKEWLQKSGGKGSRYSGERELSNPLAAVMMGLIYVNPEGVDGKPDPLKTAQDMRVTFARMAMNDEETVALTAGGHTVGKAHGNGNAANLGPAPEAAPIDEQGLGWMNHKTRGIGRDAVTSGLEGAWTTHPTQWDNGYFNLLLNYDWKLTESPAGAHQYEPINIKEEDKPVDVEDASIRCMPMMTDADIALKMDPEYRKISERFSKDQAYFSE…
AOLE_11770_ADI91243.1	ADI91243.1	CP002080.1	Acinetobacter oleivorans DR1	typical catalase Group 5	MTDNVKSTNKTSEMAGADAANKANTTQKTEQLDSVRDDATNEALTTNQGVKIADNENSLRAGIRGSTLLEDFILREKITHFDHERIPERIVHARGVGAHGYFQAYEGNERLTKAGFLTDPSIQTPIFVRFSTVQGPRGSADTVRDIRGFAIKFYTQEGNFDLVGNNAPVFFVQDGIKFPDFVHAVKPEPDTEMPTGATAHDTFWDFVSLVPESAHAVIWAMSDRAIPRNLRSIQGFGVHTFRLINAQGKSHFVKFHWTPKQGLSALVWDEAQKLAGKDPDFHRRDLYEAIENGVYPEWELGVQIVEEEDEMNFDFDLLDPTKIIPEELVPVTPIGRFVLNRNVDNFFAETEQVAFCPGHIVPGIDFTNDPLLQARLFSYTDTQLSRLGGPNFHQIPINK…
AOLE_17390_ADI92363.1	ADI92363.1	CP002080.1	Acinetobacter oleivorans DR1	catalase-peroxidase Group 4	MSDESKCPFSGHKSKPEVTVGGGTPSLHWWPKQLRVDLLNQHSERSNPLGKEFNYRQEFKKLDYYTLKADIKNVLTDSQDWWPADWGNYTGLFIRLAWHAAGTYRMGDGRGGAGRGQQRFAPLNSWPDNASLDKARRLLWPVKQKYGQKISWADLFILAGNIALESSGFRTFGFGAGREDVWEPDNDVNWGDEKEWLAHRNSEALEGSNLAATEMGLIYVNPEGPQASGDPKSAAPFIRATFGNMAMDDEEIVALIAGGHTLGKTHGAASADHVQADPEGAPIEQMGFGWSNSFGTGVGKDAITSGLEVIWSQTPTQWSNYFFENLFKYEWVQERSPAGAIQWVAADAEAIIPDPFDPSIKRKPTMLTTDLTLRFDPEFEKISRRFLNDPQAFANAFAR…
AOX59_00760_ALX47256.1	ALX47256.1	CP013862.1	Lentibacillus amyloliquefaciens	typical catalase Group 5	MAQNGHNNPNNQQNKKSKQLDQYRNDHKNSQLTTNQGMKVSNTADSLKAGERGPTLMEDFHFREKMMHFDHERIPERVVHARGFGAHGYFQVYEAMSELTSAKFLQDPSVKTPVFVRFSTVVGQRGSADTVRDVRGFATKFYTEDGNYDLVANNMPVFFIQDGMKFPDFVHSIKPEPHNEIPQATAAHDSLWDFVVNNTESAHMMLWLLSDRGIPRSFRMMEGFGVNTFRFVNAEGKGRFVKFHWKPLLGTHSLTWDEAQKLNGADPDFLRRDLWDAINQGDYPEFELGVQILEEEDEFAFDFDILDPTKFWPEEQVPVKIIGKMTLDQNQDNFFAETEQVAFHPGHVVPGIDFSNDPLLQGRLFSYLDTQLLRLGGPNFHEIPINRPIAPVKNNQREG…
AOX59_11390_ALX49134.1	ALX49134.1	CP013862.1	Lentibacillus amyloliquefaciens	typical catalase Group 6	MSNEKKRMTTASGVPVGDNQNSITAGQRGPTLIQDVHFLEKMAHFDRERIPERVVHAKGAGAFGYFEVTNDEISKYTKADFLSEKGKRTEMFARFSTVAGEKGAADTERDPRGFALKFYTDEGNYDLVGNNTPVFFVRDAMKFPDFIHTQKRNPRTGLKDKDAVWDFWSLSPESLHQITYLHGDRGIPATFRHMNGYGSHTYKWVNDQGEAFWVTYSFISDQGVKGLDADVADQLAGEQPDYHREDLYNAIENGDHPSWTLYVQIIPFEDYKTYKWDIFDITKTVSKKDYPRIEVGKMVLNRNPENFFADVEQAALSPANLVPGIETSPDKMLQGRLFSYSDTQRYRLGVNHQQIPVNRPKAEVNHYQRDGYMAVNGNGGGKPVYEPNSIDGPVEDPAS…
AOX59_12325_ALX49307.1	ALX49307.1	CP013862.1	Lentibacillus amyloliquefaciens	typical catalase Group 3	MAGKQNKNHQTNIENSDTMTNRQGHPVTNNQNIRTVGNRGPATLENYDFIEKISHFDREKVPERIVHARGAGAHGYFEAYGTAGDEPVSKYTRAKVFQEKGKQTPVFVRFSTVVHGKHSPETLRDPRGMAVKLYTEDGNWDLVGNNIKIFFIRDAMKFPDMIHAFRPDPITNIQDSQRFFDFCANSPESFHMVTFIYSPWGIPANYRMMQGSGVNTYKWVNNDGEAVLVKYHWEPKQGIKNLTVKEANEIQGENFNHATQDLYDAIEHGDYPEWELYVQIMSDDEHPELDFDPLDDTKIWPEDQFPWLPVGRMVLDKNPEDYFTEVEQSAFGTGVLVDGLDFSDDKMLQGRTFSYSDTQRYRVGANYLQVPINAAQKRVATNQEGGSMRHEPERSAKKN…
AOX59_12575_ALX50633.1	ALX50633.1	CP013862.1	Lentibacillus amyloliquefaciens	typical catalase Group 5	MDQYREHNTGPGEKMTDDAGFKISNDRWSLKAGRRGPLLFQDSHFYRKQSRFSRERIPEKVVHARGFGVYGDFETYKSMKHVTRAHFLQEAGRKTPVFTRFSNFIGSSGSKDTAVDIRGFATKFYTQDGNYDNLALQFPVFILADAMKFMDVTHAAKPNPKTHIPQATVAHDSFWDYVVSNPESAHMVMWLMSMRGRPRSWRMMAGWPINTFRFINDHGKSTFVRFKWIPKLGVHSLLLDEANIIGGVDPDFHRRDIIEAIEKGAYPEYELGVQLIDEEDEHKYDFDVLDDTKLWPEEVIPVETIGKLTLNRLVDNFFAEEEQSSFDPASLVPGINFTNDPVLQGRAFAYRDTDYHRLGTGNINEIPVNKPISETNYNNRDGFSKYRIDVDSVDYHKNT…
AOZ06_08560_ALG06970.1	ALG06970.1	CP012752.1	Kibdelosporangium phytohabitans	typical catalase Group 5	MSSRRKIAGNGSTPNADSDRGVASDGALRQEGEFLTTAQGVRLPDTDHSLKAGERGPTLLEDFHLREKITHFDHERIPERVVHARGAAAHGVFESYGTAKKVTKAQFLTKKGQQTQVFVRFSTVLGSRGSADTVRDTRGFAVKFYTDEGTFDLVGNNIPVFFIQDGIKFPDIIHAGKPHPDREIPQAQSAHDTFWDFVSLHTEATHHVMWNMSDRGIPRSYRTMEGFGVHTFRLVNDSGETALVKFHWKPVAGIHSLVWEEAQIAAGVDPDFHRRDLADSIDAGIFPEYELGIQVMPDDGTDSFHGIDLLDPTKIVPEELAPVQLVGKLTLNRNPTNYFAETEQVAFHTGHLVPGIEVTNDPLMQARLFSYLDTQLTRLGGPNFAQLPINRPRCPVNDM…
AOZ06_22030_ALG09232.1	ALG09232.1	CP012752.1	Kibdelosporangium phytohabitans	catalase-peroxidase Group 4	MSDSPDAKVGEMNVPEAGGCPVSTGRFSHPTEGGSNRDWWPNRLNLAILRKHATASNPMDADFDYKAAFATLDLDALARDVDEVLTTSQEWWPADFGNYGPFMIRMAWHSAGTYRVEDGRGGAGAGMQRFAPLNSWPDNGNLDKARRLLWPVKQKYGSKISWADLMIFAGNRALETMGFTTFGFAGGRADVWEPDEDVYWGPERTWLGDERYTGDRQLEGPLAAVQMGLIYVNPEGPNGNPDPLASARDIRETFGRMAMNDEETVALIAGGHSFGKTHGAADPDKYVGAEPEGAAIEEQGLGWRNSFGSGKGADAITSGLEVIWTPTPTQWSNWFFHNLFEYEWELTKSPAGANQWTPKNGKARNTVPHPETGKLTQTPSMLTTDLALRFDPVYEQISR…
AOZ06_26295_ALG09943.1	ALG09943.1	CP012752.1	Kibdelosporangium phytohabitans	Mn-catalase Group 10	MFLHTSKLQFEAKPDRPDALYARKLQELIGGTWGEMTVTMQYLFQGWNCRMEGKYKDLIMDVATEEIGHVEMLSTMVARLLEGAPADTTASMVDKDPVVAAIIGGMDPQQAIVSGGGPTLADSNGVPWNGRYIVASGNLMADFRANVAAEAQGRLQTARLYNMTDDQGVRDMLRFNLARDTAHQNMWLAAIEELQEDGLEGPISPSALFDEEHSEHAGTIWHTSDGTEGPKGRWASGPTPDGMHEFSYLMEPVALGDKASAPKPDPLLYATSPANLGLIEKAIRKLT
AOZ06_39330_ALG15406.1	ALG15406.1	CP012752.1	Kibdelosporangium phytohabitans	typical catalase Group 5	MGTEIVPGNALRQEGDFLTTAQGVRLPDTDHSLKAGDRGPTLLEDFHLREKITHFDHERIPERVVHARGAAAHGVFESYGTAKKVTKAQFLTKKGQQTQVFVRFSTVLGSRGSADTVRDTRGFAVKFYTDEGTFDLVGNNIPVFFIQDGIKFPDIIHAGKPHPDREIPQAQSAHDTFWDFVSLHTEATHHVMWNMSDRGIPRSYRTMEGFGVHTFRLVNDSGETALVKFHWKPVAGIHSLVWEEAQIAAGVDPDFHRRDLADSIDAGIFPEYELGIQVMPDDGTDSFHGIDLLDPTKIVPEELAPVQLVGKLTLNRNPTNYFAETEQVAFHTGHLVPGIEVTNDPLMQARLFSYLDTQLTRLGGPNFAQLPINRPRCPVNDMFRDGMHQHAVHPGLAPY…
AOZ06_39825_ALG12195.1	ALG12195.1	CP012752.1	Kibdelosporangium phytohabitans	catalase-peroxidase Group 4	MNAPKDNAPSSAQGVDQKAAAGCPVAHDSVTAHGSESENPAIDSPTPKTGGRPRTVRDWWPNQLDLSVLHAHSTKVNPLPAGFSYAEEFAKLDVDALKRDITDVLTTSQDWWPADFGHYGGLMIRMSWHAAGTYRIHDGRGGAGDGGQRFAPLNSWPDNANLDKARRLLWPVKQKYGQKISWADLLVLAGNVALESMGFETFGFGFGRADVWEPEEIFWGPEDAWLGDERYVSESQMAPEVGATEMGLIYVNPEGPRGNADPAAAAHFIRETFGRMAMNDEETVALIAGGHTFGKTHGAGVADSHVGPEPEGAPLEAQGLGWLSTHGSGKGGDTITSGLEVTWTDVPTQWSNRFFEILFGYEWELTTSPGGAKQYIAKDAEPIVPDAHDPAKKHKPTML…
AOZ07_01705_ALG27842.1	ALG27842.1	CP012750.1	Glutamicibacter halophytocola	catalase-peroxidase Group 4	MSETTAGQCPVVGNTGRVHPTQGNANTEWWPNKLNLKILAKNQEATNPLDADFDYIKAFEALDLAAVKADLAEVMTKSYDWWPADFGHYGPFLIRMAWHSAGTYRSHDGRGGGSAGQQRFAPLNSWPDNVNLDKARRLLWPVKKKYGQSISWADLMILAGNVALEDMGFETFGFAGGRKDVWEPDEDVYWGPEKVWLESERYTGARNLDAPLAAVQMGLIYVNPEGPDGVADPLASAADIRETFRRMGMDDEETVALIAGGHTFGKTHGASAESHKSGDPEASPLEMQGLGWKSDFGTGNGDDTIGSGLEVTWTYHPTRWDNEFFHILFAYEWELFHSPAGAQQWRPKDNGGADMVPMAHNSSVRREPRMLTSDLALRFDPSYEKISREFKDNQDKFAD…
AOZ07_07670_ALG28872.1	ALG28872.1	CP012750.1	Glutamicibacter halophytocola	typical catalase Group 5	MANEPMHPTDQGQQPESAPGQDSDILTTSQGAPVSDTDHSLKTGERGPTLLQDHHLREKIMHFDHERIPERVVHARGAGAHGFFTSYGNAEELTRANFLKPGRTTRVFVRFSTVVGSRGSMDTARDTRGFATKFYTDEGIFDLVGNNMPVFFIQDGIKFPDLVHAAKPHPDREIPQAQSAHDTFWDFVSLHTPAQAHVMWQMSDRAIPRSYRMMEGFGVHTFRMVNALGKSSLVKFHWKPKLGVHSLVWEESQLAGGADPDFHRRDLAEAIDAGALPEWELGVQIFEDDGTSSFEGIDLLDPTKFVPEELAPVQPLGKMVLDRNPENYFAQTEQVAFHPGHLVPGIDITDDPLLQARLFSYQDTQLTRLGGPNFAQIPVNQPQAPVNDMFRDGLHQHRV…
AP3564_01325_ASS89087.1	ASS89087.1	CP017703.1	Aeribacillus pallidus	typical catalase Group 6	MGENKKLTTSWGAPVGDNQNSMTAGHRGPTLIQDVHLLEKLAHFNRERVPERVVHAKGAGAHGYFEVTNDMSKYTKAKVFNGVGKRTPVFVRFSTVAGELGSADTVRDPRGFAVKFYTEEGNYDIVGNNTPIFFIRDAIKFPDFIHTQKRDPKTHLKNPTAVWDFWSLSPESLHQVTYLMGDRGIPATYRHMNGYGSHTFKWTNEDGESVWIKYHFKTDQGIKNLDTKTALKIAGENPDYHTEDLFNAIENGDYPSWTLYVQIMPLEDANTYRWDPFDVTKVWSHKDYPLIEVGKLVLNKNPENYFAEVEQAAFSPGNLVPGVDVSPDKMLQGRLFAYHDAHRYRIGANYNSLPINRPRVEVNNYQRDGFMRFDSNGGGSVYYEPNSFGGPKETPEAKQ…
AP3564_13110_ASS91037.1	ASS91037.1	CP017703.1	Aeribacillus pallidus	Mn-catalase Group 01	MWFYEKKLQYPVRVSTCNPKLAKFLIEQYGGADGELAAALRYLNQRYTIPDKVVGLLTDIGTEEFAHLEMIATMVYKLTKDATPEQLKEAGLGEHYVNHDSALFYNNAAGTPWTATYIQAKGDPIADLYEDIAAEEKARATYQWIIDMSDDPDLNDGLRFLRQREIVHSQRFREAVEILKEERDRKKFF
APL_0988_ABN74082.1	ABN74082.1	CP000569.1	Actinobacillus pleuropneumoniae serovar 5b str. L20	typical catalase Group 7	MSKCPFHHTSLTMNNGAPVVDNQNSMTAGPRGPLLAQDLWLNEKLANFVREVIPERRMHAKGSGAFGKFTVTHDITQYTKAAIFSEVGKETELFARFTTVAGERGAADAERDIRGFAVKFYTEQGNWDFVGNNTPVFFLRDPRKFPDLNKAVKRDPRTNMRSATNNWDFWTLLPEAFHQVTIVMSERGIPASYRHMHGYGSHTYSLINANNERFWVKFHFRTEQGIKNLTNEEAAAIIANDRESHQRDLYESIEKGDFPKWKLYIQVMPEAEAEQVDFHPFDLTKIWSKKDYPLIEVGVMELNRNPANFFADVEQSAFAPSNLVPGISVSPDRMLQARLFNYADAQRYRLGVNHHQIPVNAPRCPVHSNARDGQSRVDGNYGSTLHYEPNSFGQWQEQA…
APORC_0639_QEP40255.1	QEP40255.1	CP036246.2	[Arcobacter] porcinus	typical catalase Group 7	MKKIMTTTGGNPISDNQNSITAGERGPVLLQDYQLIQKLAHQNRERIPERVVHAKGSGAFGVLEINEDISKYTKAKVLQKGEKTKLLLRISTVAGEKGAADAERDVRGFALKFYTKEGNWDLVGNNTPVFFVRDAIKFPDFIHTQKRDPQSNLRSNTAMWDFWSLSPESLHQVTILMSDRGLPKSLRHINGYGSHTYSLINAKGERFWVKFHFKTLQGIETITNQEAEAIVGKDRESNQRDLFENIEKGNFPKWSFEIQIMTEEEAKICSFNPFDLTKVWPHKEYPMIKVGTMTLNENPKNYFQQVEQAAFSPSNIVPGISFSPDKMLQARIFSYPDAQRYRVGTHYEMLPVNRPTVEVNTYNLDGSMNFEIKEPTKAYYEPNSFDGAVEDSSFAEPDL…
APS56_02420_ALJ04078.1	ALJ04078.1	CP012898.1	Algibacter alginicilyticus	catalase-peroxidase Group 3	MDDSKMGKCPFMHGGNTATEKSVTDWWPNTLNLDILHQHDSKTNPLGKDFNYRDALKELDVEGLKKDLHDLMTDSQDWWPADWGHYGGLMIRMSWHAAGTYRIADGRGGGGTGSQRFAPLNSWPDNVSLDKARRLLWPIKKKYGNKVSWSDLIILAGTIAYESMGLKTYGFAFGREDVWHPEKDTYWGAEKEWLAPSDERYTNVDSPDTMDNPLAAVQMGLIYVNPEGVNGKPDPLKTGAQVRETFKRMAMNDEETVALTAGGHTVGKMHGNGDASILGADPEAGEIEDQGFGWSNPTRTGVGADTVTSGLEGAWTTHPTKWDNGFFEMLFNHEWESRKSPAGAWQWEPISIKEEDKPVDVENPLIRHNPAMTDADMAMKVDPIYKEISLKFKNDFEAF…
APT56_00265_ALX81711.1	ALX81711.1	CP013923.1	Achromobacter denitrificans	typical catalase Group 7	MTDKKHLTTASGAPVADNTNTLTAGPRGPALLQDFWLIEKLAHFDRERIPERVVHAKGSGAYGTFTVTHDITKYTRASIFSKVGKQTPLFLRFSTVAGERGAADAERDVRGFAIKFYTDEGNWDLVGNNTPVFFIRDPLKFPDFIHTQKRDPKTNLRSATAAWDFWSLSPESLHQVTILMSDRGIPANLRQQHGFGSHTFSFVNAEGERFYVKFHFKSQQGIACLTDEEAAQVVAHDRESSQRDLFDNIEQGNFPKWTLKVQIMPAAEAETYHINPFDLTKVWPHGDYPLIEVGVLELNKNPENYFAEVEQAAFTPANVVPGIDFSPDKMLQGRLFSYGDTHRYRLGINHHQIPVNAPRCPFHSYHRDGAGRVDGNAGGTLNYEPNSAGEWKETPSAGE…
APT56_13765_ALX84163.1	ALX84163.1	CP013923.1	Achromobacter denitrificans	typical catalase Group 5	MASKKPSKAKAQGPVDTAFNNTDSGPGAPPAGAATPAMRRAAAVAETVQALPHHADKANEYGEEGARCPYLGAQVEPPDAVVGASTLSEREGNAKTGEGAAPGVNAVDGQLARVRADAQRQALTTNQGVPVSDNQHSLKAGLRGPALLKDFILREKITHFDHERIPERIVHARGSAAHGYFECYEPLTDLTRASLFAEKGKRTPVFVRFSTVAGERGSKDTARDVRGFAVKFYTDEGNWDLVGNNMPVFFIQDAMKFPDLVHAVKPEPHHGMPQAASAHDTFWDFVSLMPESTHMLMWLMSDRAIPRSYRMMQGFGVHTFRFVNERGESRLVKFHWNPVAGTHSQVWDEAVKVSGADPDFHRRDLWEAIDSGHGPEWELGVQVFTEEEAERFSFDVLDA…
APZ00_11335_ALV27586.1	ALV27586.1	CP013068.1	Pannonibacter phragmitetus	typical catalase Group 5	MSQQHPPAQSARIHDQTLTRGQGGELHQTAEEGMDILTTAQGTPVGDDQNTLRAGARGPALMEDQHFREKIFHFDHERIPERVVHARGYGAHGYFETYKSLAEYTSADIFQRAGEITPVFVRFSTVAGSKGSFDLARDVRGFAVKFYTKEGNWDLVGNNIPVFFIQDAIKFPDVIHSVKPEPDRAFPQAQSAHDNFWDFISLTPESMHMIMWVMSDRAIPRSFRFMEGFGVHTFRLVTEEGKSTFVKFIWKPKSGMQSVLWNEALKINGADPDFHRRDLWEAITSGQFPEWELCLQLFDQDFADSFDFDVLDPTKIIPEEILAPVPVGRLILDRMPDNFFAETEQVAFMTQNVPPGIGFSDDPLLQGRNFSYLDTQLKRLGSPNFTHIPVNAPKCPFAH…
APZ00_23540_ALV29648.1	ALV29648.1	CP013068.1	Pannonibacter phragmitetus	catalase-peroxidase Group 3	MDATNASKAGKCPVMHGGNTATGNSNMEWWPNALNLDILHQHDAKSNPLGKDFNYRDELKKLDAEALKADVKALLKDSKDWWPADWGHYGGLMIRLAWHSAGSYRLADGRGGGGSGNIRFAPLNSWPDNASLDKARRLLWPVKKKYGNKISWADLILLSGTLAYEDMGLKTFGFSFGREDIWHPEKDTYWGAEKEWLAPSDNRYEDVTKPETMENPLAAVQMGLIYVNPEGVNGKPDPLATAAQVRETFARMAMNDEETAALTAGGHTVGKAHGNGDAGALGVEPEAAGLEAQGLGWLNPNQHGKASEAVTSGIEGAWTTNPTVFDMGYFDLLFGYEWELTRSPAGAQQWQPVGIKEEDMPVDATDPSVRRMPMMTDADMAMKMDPKYRAICEKFMADP…
AQ505_10720_ALL05927.1	ALL05927.1	CP012996.1	Pedobacter sp. PACM 27299	typical catalase Group 5	MAKQKSQVKPGNQPENEKTKDLQPHTADASGEFMTTDHGVRINDDQNSLKAGERGATLLEDFILREKITHFDHERIPERIVHARGSGAHGVFKLYESQSAFTKAHFLNDTTTETPVFVRFSTVAGSRGSTDLARDVRGFAVKFYTQQGNFDLVGNNMPVFFIQDAMKFPDLIHAVKPEPDNEMPQAASAHDTFWDFISLMPESAHMIMWAMSDRAIPRSLRMMEGFGVHTFRFINEKGEGCFVKFHWKPLLGVHSVAWDEAQNISGKDSDFHRRDLWEAIESGAFPEWELGVQIVPEADEFKFEFDLLDPTKLIPEELVPVQRIGKMTLNRNPDNFFAETEQVAFHVGHIVPGIDFTNDPLMQGRLFSYTDTQLIRLGGPNFHEIPINRPIVPVHNNQR…
AQ505_15535_ALL06779.1	ALL06779.1	CP012996.1	Pedobacter sp. PACM 27299	catalase-peroxidase Group 4	MENESNDISKCPFHNGSLKHNVGGGGTRNHDWWPNQLKLSILRQHSSLSNPMGEDFDYAKAFNSLDLAAVKKDLHALMTDSQDWWPADFGHYGGLFIRMAWHSAGTYRVGDGRGGAGAGLQRFAPLNSWPDNVSLDKARRLLWPIKQKYGRNISWADLMILTGNVALESMGFKTFGYAGGRIDLWEADESVYWGSETKWLGGDIRYAQGSEGVSEDHGVLVSDDDPDGKTHSRKLEKPLAAVQMGLIYVNPEGPDGDPNPVASAKDIRDTFGRMAMNDEETVALIAGGHSFGKTHGAAPADNVGKEPEAVDLEMQGLGWANGYRTGKGPDAITSGLEVIWTTTPTQWSNNFFENLFGFEWELTTSPAGAHQWVARDAAAIIPDAFDTEKKHLPTMLTTD…
AQ505_20335_ALL08908.1	ALL08908.1	CP012996.1	Pedobacter sp. PACM 27299	typical catalase Group 7	MENNNTNKRKLTTASGRPYAEHENTQSVGSRGPLLLQDFILHEKMAHFNRERIPERVVHAKGTGAYGTFKVTNDITQHTKAKIFGAIGNECKVFLRFSTVGGEKGSADSERDPRGFAIKFYTEDGNWDLVGNNTPVFFVKDPKKFSDFIHTQKRDPRTNLKSPTMMWDFWSLNPESLHQVMILMSDRGTPYSLRNMDGFGSHTYSFINKDNERVWVKFHFKTQQGIKNFTGPEADAMRTQDMDHSQRDLVDAIDRGDFPKWNLKIQIMTEAEAKTFRWNPFDLTKVWPHGEFPLIDVGVLELNQIPRNYFAHVEQAAFAPSNTVDGIGYSPDRMLQGRILSYADAHRYRLGVNYEQIPVNACPFMVNNYHRDGQMRIDDNGNDDPNYYPNSFGDVIPDE…
AQ611_03170_AOK28577.1	AOK28577.1	CP013448.1	Burkholderia sp. Bp7605	typical catalase Group 4	MSVPVHRTLKSVVAALCVALSYSAHAENLTRDNGSPVGDNQNSQTAGPSGPTLLQDSHLIEKLQRFDRERIPERVVHARGTGAFGEFVSSADISDLTLAKVFVPGTTTPVFVRFSTVMGYRGSPEQARDPRGFAVKFYTTQGNWDLVGINWPIFFIRDAIKFPDFVHANKPSAVTGVQDPNLAFDFFAHTPEATSMLTCLYTDEGMPDSYRHMDGFGVHAFKLVNAQGNVHYVKFHWKSLQGVRGIRPQDIPGSIGADWNLMTNDLYGALKAGNYPKWDLYIQVLNPEDLGKFDYDALDDTKVWTGVPERRIGTLTLNRVPDNYFETTEESAFAPSRMVPGIEPSEDRMLQGRLFSYADTQMYRLGANFSQLPVNRPRVPVVSNNQDGAMNAGDRKGEV…
AQ611_12425_AOK30114.1	AOK30114.1	CP013448.1	Burkholderia sp. Bp7605	typical catalase Group 5	MTNSHRGHPPSNPAPQPDSAKSRQLDTYRVHPDGEALRTNQGVRIADNQNTLRAGARGPSLLEDFIMREKITHFDHERIPERVVHARGSAAHGVFRVYRSMAEYTKAAFLQDPAVQTPVYVRFSTVQGPRGSADTVRDVRGFAVKFYTDEGNYDLVGNNMPVFFIQDAIKFPDFVHAVKPEAPNEMPTGASAHDTFWDFVSLVPEATHMVLWLMSDRALPASFRAMDGFGVHTFRFVNAAGAVRFVKFHWRPVNGAYSLLWDEAQRIAGHDPDFNRRDLWESIERGDYPEYELGVQMIEPEDADAFDFDLLDPTKLIPEERVPVRPIGRMTLNRNPDNFFAETEQVAFHPGHVVPGIDFTNDPLLQGRLFSYTDTQLSRLGGPNFHEIPINRPLCPFAN…
AQ611_16760_AOK31262.1	AOK31262.1	CP013449.1	Burkholderia sp. Bp7605	catalase-peroxidase Group 4	MSTETKCPFKHTAGGGTSNQDWWPNQLKLNLLRQHSSLSDPMDKDFNYADAFKSLDLAAVKKDLLALMTDSQDWWPADFGHYGPLFIRMAWHSAGTYRTADGRGGAGSGQQRFAPLNSWPDNASLDKARRLIWPIKQKYGRKISWADLIILTGNVALESMGFKTFGFAGGRVDAWEPDEDIYWGSEKTWLGDQRYTGERDLENPLAAVQMGLIYVNPEGPNGNPDPVAAARDIRETFARMAMNDEETVALIAGGHTFGKAHGAAPASHVGPEPEAAGLEQQGLGWKNDFGTGKGDDAITSGLEVIWTTTPTKWSNDFFDNLFGYEWELTKSPAGAHQWKPKGDAGAGTVPDPHDPSKRRSPSMLTTDLALRFDPAYEAISRRFHQNPDQFADAFARAWF…
AQ619_16010_ALL14742.1	ALL14742.1	CP013002.1	Caulobacter henricii	typical catalase Group 7	MTDKFLTTTAGAPIADNQNSLSAGPRGPLLMQDYQLLEKLAHQNRERVPERVVHAKGSGAYGTLTVTQDVTRWTKARFLSEVGKQTEILMRFSTVAGERGAADAERDVRGFSIKAYTEEGNWDMVGNNTPVFFVRDPMKFPDFIRTQKRHPVTNLRSPTAMWDYWSLSPESLHQVTTLFSDRGLPQGFRFMHGFGSHTYSFFNEANERVWVKFHFKSMQGIRTWTNAEGNAVIANDRESAQRDLFEAIEAGDFPRWRFCIQVMTEAQAETFRWNPFDLTKVWPHADYPLIEVGIVELNRNADNYFAEIEQSSFSPSNVVPGIGFSPDKVLQARIFAYADAHRYRIGTHYEALPVNRPRCPVNHQHADGAMRFDAPPRTNAWYEPNSFGGPVQDRRFAEP…
AQUSIP_06810_VVC75391.1	VVC75391.1	LR699119.1	Aquicella siphonis	catalase-peroxidase Group 4	MSTETKCPFHQAAGKGMSTRDWWPHQLKLNLLHQHSSLSDPMGEDFNYAKEFNSLDLAAVKKDLQTLMTDSQDWWPADFGHYGPLFIRMAWHSAGTYRIGDGRGGAGRGSQRFAPINSWPDNINLDKARRLLWPVKQKYGQKISWADLIILAGNVALESMGFKTFGFAGGRKDIWEPQEDIYWGSENKWLDDKRYTGERDLENPLAAVQMGLIYVNPEGPNGNPDPLAAARDIRETFARMAMNDEETVALIAGGHTFGKTHGAGDVKHVGPEPEAAGIEEQGLGWRNSFGRGKGGDTISSGLEVTWTATPTKWSNHFFENLFGYEWELTKSPAGAHQWIAKGGAGAGTIPDAHDPSRHHAPTMLTTDLALRFDPVYEKISKHFLEHPDQFADAFARAWF…
AR327_01965_AMO31363.1	AMO31363.1	CP014643.1	Lysinibacillus sphaericus	typical catalase Group 7	MTNANDRSRRFTTAGGAPVVSNHDSMSAGPRGPLLLQDVWLVEKLANFNREVIPERRMHAKGSGAFGTFTVTHDITQYTKAKIFSEVGKKTEMFARFSTVAGERGAADAERDIRGFALKFYTEEGNWDLVGNNTPVFFFRDPLHFTDLNHVVKRDPRTNMKNANSNWDFWTLLPEALHQVTIVMSDRGIPTGYRNMHGFGSHTYSFINADNERVWVKFHFRTEQGIKNLTGAEATEVIGQDRESSQRDLYEAIEKGDFPKWKMYIQVMTEEQARELPYNPFDLTKVWYKKDFPLIPVGEFELNKNPDNYFAEVEQAAFAPSNIVPGISFSPDKMLQGRIFAYADAARYRLGVNHYMLPVNAPKCPFRTFHRDGAMRFDGNLGSTLGYEPNSYGEWEHNL…
AR327_05610_AMO31989.1	AMO31989.1	CP014643.1	Lysinibacillus sphaericus	typical catalase Group 5	MKKDINQKQHQLEAFRVSDKNQPLTTNQGLKIAEDEHSLKAGNRGPTLLEDFHFREKMTHFDHERIPERVVHARGSAAHGIFETYECASDITKAQFLNGKGTKTPVFVRFSTVAGSRGSADTVRDARGFATKFYTQEGNYDLVGNNIPIFFIQDAIKFPDFVHAVKPEPNNEIPQAQSAHDTFWDFIANNQESAHMVMWHMSDRSIPRSYRMMEGFGVNTYRFINSEGKSHFVKFHWKPVLGVKSLVWDEAQIIAGKDPDFHRRDLWESIERGDYPEWELSVQLIPLEDEFKFNFDILDATKIWPEEEVPVRILGKMTLNKNVDNFFAETEQAAFHVGHVVPGIDFSNDPLLQGRLFSYTDTQLIRLGGPNFHEIPINKPICPFHNNQRDGYGRQTINV…
AR327_06645_AMO32161.1	AMO32161.1	CP014643.1	Lysinibacillus sphaericus	typical catalase Group 3	MTQKNDSTHDQDTTLTNRQGHPITNNQNLRTVSNRGPATLENYDFLEKISHFDRERVPERVVHARGAGAHGYFETYGVVGNEPISKYTRAKVFQDKGKKTPVFVRFSTVIHGGHSPETLRDPRGFAVKFYTEDGNWDLVGNNLKIFFIRDAMKFPDMIHAFKPDPITNIQNVERFFDFCASSPESFHMVTFVYSPWGIPANYRMMQGSGVNTYKWVNQEGKGVLVKYHWEPLQGIKNLTQKEAEEIQQKNFNHATQDLYDAIEREEFPEWELHVQIMEDGPHPELDFDPLDDTKLWPNDQFPWYPVGKMVLNKNPEDYFAEVEQATFGTGVLVDGLDFSDDKMLQGRTFSYSDTQRHRVGANYLQLPINAPKKRVATNQSGGQMMYKRDLAPGQNPHIN…
AR327_21775_AMO34873.1	AMO34873.1	CP014643.1	Lysinibacillus sphaericus	typical catalase Group 5	MKGDCVDKPNSNQRKNIEENAKDQQLEPFRVENEGTKMTTNQGLRVSNDEDSLKAGVRGPTIMEDFHLREKITHFDHERIPERVVHARGFAAHGEFELYESMREYTKAKFLQDPKKKTPVFVRFSTVVGSLGSMDTARDVRGFATKFYTDEGNYDLVGNNIPVFFIQDAIKFPDLIHAVKPEPHNEMPQAASAHDTFWDFVANNQEIAHMIMWHMSDRTIPRSFRMMEGFGVHTFRFVNDRGRSRFVKFHWKPVLGVHSLVWDEAQIIAGKDTDFQRRDLWEAIEIGDYPEFELGVQILEPEDEFKFDFDILDATKLWPEELIPVKIIGKMTLNRNVDNVFAETEQVAFHPGNVVPGIDFTNDPLLQGRLFSYLDTQLIRLGGPNFTEIPINRPLCPVH…
AR456_10070_ALM52587.1	ALM52587.1	CP013106.1	Halomonas huangheensis	catalase-peroxidase Group 4	MSEQSSSSKCPFHSTGASIPAPGGGTTNRDWWPSQLRIDLLHQHSSRSNPMGENFNYAEEFKSLDLDAVKADLRALMTDSQEWWPADFGHYGPQFIRMAWHAAGTYRTFDGRGGARRGQQRFAPLNSWPDNVNIDKSRRLLWPIKQKYGRKISWADLMILTGNVALESMGFKTFGFAGGREDIWEPDQDVYWGSETAWLGSDKRILSEDRDLEKPLGATHMGLIYVNPEGPEGNPDPVAAAHDIRETFARMAMDDEETVALIAGGHTFGKTHGAAPDSHLDAAPEAAGLETQGLGWASRYGSGFAGDAIGSGLEVTWTATPTRWSYYFFENLFKYDWELVKSPGGAWQWQATNADKSIPDAHDPSSKRLPTMLTTDLSLRFDPAYEKISRHFYENPQEF…
AR456_13300_ALM53149.1	ALM53149.1	CP013106.1	Halomonas huangheensis	typical catalase Group 5	MANNPYTESNRDAAHDTECHSDDDSKSDLLEAYRSDAEGHDLRTNQGTRIADDHNSLKAGERGPTLLEDFVFREKMNHFDHERIPERIVHARGAAAHGYFQPYKAAARYSRAGLFKDTSRKTPVFVRFSTVQGGRGSNDTVRDVRGFAVKFYTDEGNWDLVGNNMPVFFIQDAMKFPDFVHAVKPEPHNEIPQGQSAHDTFWDFVSLMPESAHMVLWTMSDRAFPRHYRYMEGFGVHTFRLIDREGKARFVKFHWKPLAGTHSLIWDEAQKLWGRDPDFNRREMWGDIENGDALEWELGIQVVEEDDEHAFDIDILDPTKLIPEEQVAVTPIGKMVLDRNPDNYFAETEQVAFNPGNVVPGIDFSNDPLLQGRLFSYLDTQMLRLGGPNFHEIPINQPV…
AREALGSMS7_03154_ASO06583.1	ASO06583.1	CP022515.1	Arenibacter algicola	catalase-peroxidase Group 4	MENKTHSSPSSNGKVWDVNEASSQCPFLNGELHQTAGGGTSNREWWPNQLKLNILRQNSSLVDPMDPDFDYAEEFKKLDLAAVKKDLYELMTTSQDWWPADYGHYGPFFIRMAWHSAGTYRIQDGRGGAGSGSQRFAPLNSWPDNANLDKARLLLWPIKKKYGKKLSWADLLILAGNCAHESMGLKMFGFAGGREDIWESEQDVYWGSETEWMGNKERYSENGELETPLGAAHMGLIYVNPEGHNANPDPVESAHYIRDTFGRMAMNDYETVALIAGGHTFGKTHGAADPTKYVEAEPAAAGIEAQGLGWKNNYGTGVGADTITSGIEGAWTDTPTKWSHTFFKNLFGYEWELTKSPAGAHQWKPKNNAGAGTVPDAHNPEVKHAPFMLTTDLSLRMDP…
ART_0324_AIX99922.1	AIX99922.1	CP007595.1	Arthrobacter sp. PAMC 25486	typical catalase Group 5	MAHPSPPVPGAPSAEPPSFAEPTEPRKPLPPKPDQHGPELVSPTGTPTGEPEGSRSQSGDYLTTAQGARLQDTDHSLKAGRRGPILLQDHHLREKITHFDHERIPERVVHARGAGAHGVFQSYGTGSGLTRAGFLAPEVETPVFVRFSTVVGSRGSADAVRDTRGFAVKFYTEEGTFDLVGNNIPVFFIQDAIKFPDVVHAAKPHPDREIPQAQSAHDTFWDFVSLHTEAQAHTLWFMADRGIPRSFRMMEGFGVHTFRLINDAGSTALVKFHWKPALGVHSLVWEEAQLVNGVDPDFHRRDLADAIEAGHFPSWELGVQVFPDVEDEMYQGIDLLDPTKFVPEELAPVQMLGRMTLTANPKNYFAETEQVAFHPGHLVPGIDVSNDPLLQGRLFSYLD…
ART_2241_AIY01840.1	AIY01840.1	CP007595.1	Arthrobacter sp. PAMC 25486	typical catalase Group 7	MTVENTAPLTTAAGAPVANNQDSLTAGPRGPMLLQDVWFLEKLAHFSREVIPERRMHAKGSGAFGTFTVTNDITKYTKASIFSEVGKQTEMFARFSTVAGERGAADAERDIRGFSVKFYTDEGNWDLVGNNTPVFFFRDGLKFPDLNRAVKRDPRTNMRSAENNWDFWTNLPESLHQVTIVMSDRGIPDGYRHMHGFGSHTFSLINAEGERFWVKFHHVTQQGIKNLTDEEAGAVVAADRESSQRDLFDSIENGDFPKWKLMVQIMPEADAETYKYHPFDLTKVWSKKDYPLIEVGEWELNRNAENYFADVEQAAFSPANVVPGISFSPDRMLQARLFSYGDAQRYRLGVNHHQIPVNAAKNPVNTYHRDGQGRVDGNQGRTPGIEPNSYGRWPEQPAY…
ART_3540_AIY03139.1	AIY03139.1	CP007595.1	Arthrobacter sp. PAMC 25486	typical catalase Group 5	MTESSLPVPPPVPGTPSVEPPSYDEPTQPRKPLPPKTDQHGPELVSPTGAPTGETENSRSQSGDYLTTAQGTRLQDTDHSLKAGRRGPTLLQDHHLREKITHFDHERIPERVVHARGAGAHGVFQSYGTGAGLTRAGFLAPEVETPVFVRFSTVVGSRGSADAVRDTRGFAVKFYTDEGTFDLVGNNIPVFFIQDAIKFPDVVHAAKPHPDREIPQAQSAHDTFWDFVSLHTEAQAHTLWFMADRGIPRSFRMMEGFGVHTFRMINAKGTTALVKFHWKPALGVHSLVWEEAQILNGIDPDFHRRDLADAIESGHYPSWELGVQVFPDTEDEMFAGIDLLDPTKFVPEELAPVQMLGRMTLNANPKNYFAEVEQVAFHPGHLVPGIDVSNDPLLQGRLF…
AS188_05550_ALU39303.1	ALU39303.1	CP013254.1	Kocuria flava	typical catalase Group 5	MRKRILRKTRGADRGEQAPLPPGVPGSEPASVAEPTGPRPPLPPKPDQGTPEPVSPTGQDTGADPLRDAQGGEHLTTAHGARRSDTDHSLKAGRRGPVLLQDHHFREKVSHFDHERIPERVVHARGAGAHGVFRGYGTAERISAAHVFKKDVETPVFVRFSTVLGSRGSADLARDTRGFATKFYTAEGTWDLVGNNIPVFFIQDAIKFPDVVHAAKPHPDREIPQAQSAHDTFWDFVSLHTEAQHHTIWNMSDRGIPRSYRTMEGFGVHTFRLVDDDGRSVLVKFHWKPKLGVHSVLWEEALLANGADPDVHRRDLADAIEAGAFPEWELGVQVFEDNEEQMFRGIDLLDPTKIVPEELAPVEPIGLMTLNRNPSNYFAETEQVAFNPNNLVRGIDVTN…
AS188_08650_ALU39807.1	ALU39807.1	CP013254.1	Kocuria flava	typical catalase Group 3	MTYEPDQTLTTRQGHPVRDNQNTRTIGSRGPATLENYQFLEKMSHFDRERIPERVVHARGTTAFGYFESYGTWGDEPISRYTRAKLFQEKGKRTDVALRFSTVAGGRDSSEVARDPRGFAVKFYTEDGNWDLVGNNLGVFFIRDAIKFPDFIHSQKPDPVNFEAGVANRAFDFFSQSPEAMHMIMLVFGPRGIPADYRHQQGFGVNTYRWVNAAGESKLVKYHWVPKDGVKSYTSEDAANVQAGTLGSHTKDLYDAIEAGDHPEWELRVQLMDDHDHPELDFDPLDDTKVWPEELFPPKPVGRMVLNRNPENFFAENEQIAFGTGVLVDGLEFSDDKMLVGRTFSYSDTQRYRVGPNYLQLPVNAPKAKVATNQRDGQMAYHVDHAPGQNPHVNYEPSI…
AS188_10700_ALU40136.1	ALU40136.1	CP013254.1	Kocuria flava	Mn-catalase Group 10	MFTHSQTLQYRATPEAPDAVYARKLQEVIGGQYGEITVAMQYSFQAWNAHIPGKYRDLLFGTAAEEFGHIEMLATMVAQLLEKAPLGITEDAVQGDPAVAAVIGGTDLQHAIVAGAGARPVDSMGNPWSGSYVTASGNLLADMTANVNAEMQGRTQVARLYHMTDDKGVRDMLSFLLARDTMHQNQWMAAVRELQADGLEQMPVPSNFPQAKEATDFSYDYYNFSDGTAAAEGSWASGPSPDGKGEFGYRDRPMAGVPMPPPTHPDARFYGTTEQSNLKEKAAGAIQDTLRKE
AS19_19040_BAP14755.1	BAP14755.1	AP014613.1	Alcanivorax sp. NBRC 101098	typical catalase Group 6	MSDKPAKPTTTDGGIPVASDEHSLTIGADGPIVLHDHYLIEQMANFNRERIVERQPHAKGGGAFGHFEVTKDVSAYTKAAVFQPGTKTDTLIRFSTVAGERGSPDTWRDPRGFSLKFYTSEGNYDMVGNNTPVFFVRDPMKFQHFIRSQKRRADNGLRDHDMQWDFWTLSPESAHQVTWLMGDRGIPKTWRHMNGYSSHTYMWINAKDEKFWVKYHFKTDQGIECMTQDEADSMAGKDGDYHRRDLFDSIKNGDYPSWTLHMQIMPFEDAKTYRLNPFDLTKVWPHSDYPLMEVGKLTLNRNPTDFHTEVEQAAFEPNNLVSGIGLSPDKMLLARGFSYADAHRHRLGVNYKQIPVNKPKCPVNSYSKDGVGRTENVSDPVYAPNSYGGPEADPQRGQD…
AS850_00820_ARC55615.1	ARC55615.1	CP014619.1	Frondihabitans sp. 762G35	catalase-peroxidase Group 1	MSTDDQTNTCSFHMAGDLPAGGDHLGGTFGQAPSLDSWYPQRLKVELLHRNGVGADPLGADFDYAAAFATIDLEALKADIKALLTTSVDWWPADYGNYGPQMIRMAWHAAGTYRIADGRGGAGTAMQRFAPIGSWWDNGNTDKSRRLLQPIKHKYGNALSWADLMVLTGNCSLELMGLPTYGFGGGRLDAWEPDDGTWWGPEVWNPHAVESPDEMVSRDERWHGQNGDADYDLQSPLAASHQALIYVNPEGPYANGDPMGSARDIRITFTRMAMNDEETVALIAGGHAFGKSHGQVPASDIGPSPELAPIESMGLGWHNPVGSGNAENTSTNGIEGSWTPNPTQWDNTYLENLFAYDYEQTKSPAGALQWTPTDPNAPKTPDAHVPGQMNPLMMMTSDI…
AS850_13840_ARC58161.1	ARC58161.1	CP014619.1	Frondihabitans sp. 762G35	typical catalase Group 6	MTDQKFTTTTSGAPVASDEHSQTVGADGPVVLHDHYLVEKLAQFNRERIPERVVHAKGGGAFGTFVTTGDVSQYTRAALFQPGVETELLARFSTVAGEQGSPDTWRDPRGFSLKFYTSEGNYDLVGNNTPVFFIRDGIKFPDFIRSQKRLPGSHLRDHNMQWDFWTLSPESAHQVTWLMGDRGLPASWRHMDGFGSHTYQWINAAGERFWVKYHFKTDQGIDILKQEDADRIAGEDADYHLRDLSSAIDRGDFPSWSLSVQIMPYADAESYRFNPFDLTKVWPHSDYPLIEVGTMTLNRNPENYFAQIEQASFAPSNFVPGIATSPDRMLLARIFSYADAARYRVGTNHDQLPVNAPKSPTHSYSKDGASRYSFHAPDVPVYAPNSFGGAHADPERAGD…
AS9A_0246_AEF38706.1	AEF38706.1	CP002786.1	Hoyosella subflava DQS3-9A1	typical catalase Group 6	MTTAADQPVPATTSNSGIPVSSDETSLTLGEQGPIVLHDHYLIEKMAHFNRERVPERVVHAKGSGAFGELEVTEDVSEFTCADFLQQGKKTEMVIRFSTVAGEQGSPDTWRDPRGFAMKFYTEQGNYDLVGNNTPVFFVRDPMKFQDFIRSQKRMPDSGLRDHNMQWDFWTLSPESAHQVTWLMGDRGVPKTYRHMDGFGSHTYMWINKNGKRSWVKYHFKTMQGADFLTQEEADKLAGADPDFHRKDLFNAIKNGDFPKWSLEVQIMPFEDAEKYRFNPFDLTKVWSQKDYPRKKVGVLTLNRNPENFFAQIEQAAFEPSNVVPGIGFSPDKMLLGRVFSYADTHRYRIGVNYTQLPVNAPKSPVHTYAKDGNMRYAYNSPEVPVYAPNSAGGPAANE…
AS9A_1420_AEF39872.1	AEF39872.1	CP002786.1	Hoyosella subflava DQS3-9A1	typical catalase Group 5	MERRDSKDRSLDAARTNDDNSWLTTQQGVRVEHTDDSLKAGVRGPTLLEDFHAREKITHFDHERIPERVVHARGAGAYGYFKAYDTRLRDYTAAEFLTEPKLTTPVFVRFSTVAGSRGSADTVRDVRGFATKFYTKQGNYDLVANNMPVFFIQDGVKFPDFVHAVKPEPASEIPQAQSAHDTFWDFVWLHPESLHMVMWLMSDRALPRSYRMMQGFGVHTFRLVDFEGNGTFVKFHWRPILGSHSLEWAECQRIAGADPDYNRRDLWDAIEAGQFPEFELGVQLISELREHDFDFDLLDPTKIVPEEQVPVQPVGRMVLNRNPQNFFAETEQVAFHTANVVPGIDFTNDPLLQARNFSYLDTQLIRLGGPNFSQLPINRPVVEVHTNQRDGYGQHTIHT…
AS9A_2372_AEF40819.1	AEF40819.1	CP002786.1	Hoyosella subflava DQS3-9A1	catalase-peroxidase Group 4	MGGGFDYTEEFKKVDVEALKRDVAEVLTDSQDWWPADFGHYGGLMIRMSWHQAGTYRIFDGRGGGGDGNQRFAPLNSWPDNANLDKARRLLWPVKKKYGKSVSWADLLVFAGNVALESMGFKTFGFGFGREDVWEPEEIFWGPEETWLGDERYSGERELANPLGAVQMGLIYVNPEGPNGNPDPLAAARDIRDTFARMAMNDEETVALIAGGHTFGKTHGAGDADEHVGPEPEGAPLEEQGLGWKSTYGTGKGADSITSGLEVTWTDKPTQWSNRFFEILFGFEWELSKSPAGANQWVAKDAEPIIPDAQDSSKKHLPTMLTTDLSLRFDPTYEKISRRFLENPDEFALAFAKAWYKLLHRDMGPVTRYLGPWVAEPQLWQDPVPAADHDLIDEQDIAS…
ASJ30_04670_APH00914.1	APH00914.1	CP013290.1	Janibacter indicus	typical catalase Group 5	MPTKKRTTNHDADPPAHDGVGAGGETHQRAGGDSPVMTSAHGVPIEDDNNSLRAGERGPTLMSDHAFREKLFHFDHERIPERVVHARGYGAHGVFECHESLADITRASIFASAGKKTETFVRFSTVAGNLGSFDLARDVRGFATKFYTDEGNWDLVGNNIPVFFIQDAVKFPDLVHAVKEEPDRGFPQAQSAHDTFWDFASLMPESTHMTLWQMSDRAIPRSFRMMEGFGVHTFRFINDAGDSSFVKFHWKPVLGMQSVVWNEAVKINGADPDFHRRDLFDAITVGDFPQWELGVQVFDDAFADEFDFDVLDATKLIPEEIIPVRTVGTMTLNRLVDNVFAEVEQVAFMTQNVPPGIDFSNDPLLQGRNFSYLDTQLKRLGSTNFSQLPVNAPRCPVAH…
ASJ30_09025_APH01653.1	APH01653.1	CP013290.1	Janibacter indicus	typical catalase Group 6	MSSTPSTPAPRSDANGTLDVSGQSTQVNGAPAVSDRNSLSVGSNGPLLLHDTHLVDTLAHFNRENIPERKPHAKGSGAFGHFETTADVSQYTKAALFQQGTTTRMLARFSTVAGELGSPDTWRDVRGFALRFYTSEGNFDLVGNNTPIFFLRDPLKFPHFIRSQKRLPDSGLRDNTMQWDFWTNNPESAHQVTYLMGDRGLPRSWRHMNGYGSHTYMWVNASGEKFWVKYHFHTQQGVEGLTNDAAGRLAGEDAEFHRRDLFDAIARGEHPQWKLSVQVMPYEDAKTYRFNPFDLTKTWSHEDYPLIEVGTMTLDENPVNFFAQIDQAAFAPSNTVPGIGFSPDKMLLGRVFAYADAHRARIGPNFHQLPVNRPAVAAENHFSFDGPMRYEHSGAAPVY…
ASN_916_CEF40317.1	CEF40317.1	LN606600.1	Acetobacter senegalensis	typical catalase Group 5	MSTTDTDRKPVTLGEEKVQRGAGGETHQTAHGDVPTLTTQQGVPVADDQNTLKAGARGPSLLEDFHFREKIFHFDHERIPERVVHARGYGAHGFFELTHSLSDITRADVLQRVGERVPAFVRFSTVAGSKGSFDLARDARGFAVKLYTKEGNWDLVGNNIPVFFIQDAIKFPDMVHAVKEEPDRAFPQAQSAHDNFWDFISLTPESMNMIMWVMSDRGIPRSFRFMEGFAVHTFRFVTADGKSTFAKFHWKPKQGLQSVVWNEAVKINGADPDFHRRDLWNAIQAGNYPEWELGVQLFDDEFADTFDFDILDATKLIPEELVPVQPVGRLVLDRMVDNFFAETEQVAFCTQNVVPGIDFTNDPLLQGRNFSYLDTQLKRLGGPNFTHIPINAPKCPFHH…
ASO14_2745_AMA63164.1	AMA63164.1	CP013217.1	Kurthia sp. 11kri321	typical catalase Group 7	MTENKNTDHQRLTTATGTPVVSHSNSMTAGKRGPILLQDVFLIEKLANFNREVIPERRMHAKGSGAFGTFTVTNDITKYTKAKIFSEVGKQTEMFARFSTVAGERGAADAERDIRGFALKFYTEEGNWDMVGNNTPVFFFRDPLHFPDLNHVVKRDPKTNMKNANSNWDFWTMLPEALHQVTIVMSDRGIPKGYRNMHGFGSHTYSMINADNERVYVKFHFRTQQGIENYTNAEAAEVVGQDRESSQRDLFNAIEKGDFPKWKMYIQVMTEEQARNHPDNPFDLTKVWYKADYPLIEVGEFELNRNPENYFADVEQAAFAPSNVVPGISFSPDRMLQARLFGYQDAARYRLGVNHHQIPVNTPKCPFMVYHRDGQGRADGNRGSAITYFPNSYGALHPQ…
ASQ50_02790_AMQ87691.1	AMQ87691.1	CP014754.1	Marinobacter sp. LQ44	catalase-peroxidase Group 3	MSENNSGGKCPVMHGSNTQEQGNVAAWWPENLNLDILHQHDSKTNPMGDDFDYREEVKKLDYEALEKDMHELMTNSQDWWPADWGHYGGLMIRMAWHAAGTYRLADGRGGGGTGNQRFAPLNSWPDNGNLDKARRLLWPIKKKYGNKVSWADLFILAGNIAYESMGFKTFGFSYGRQDIWHPEKDIYWGAEKEWLAPSDSRYEDVDKPSTMENPLAAVQMGLIYVNPEGVNGNPDPLKTGEQVRETFARMAMNDEETAALTAGGHTVGKAHGNGDAGALGPEPEAADVENQGFGWINPNMQGKATNAITSGIEGAWTTNPTKFDMGYFDLLFGYDWQLTKSPAGANQWEPVDIKEEHMPVDPTDMKTRVKPMMTDADMAMKMDPKYRAICEKFMADPEY…
ASU1_01725_AIJ30621.1	AIJ30621.1	CP009159.1	Actinobacillus suis ATCC 33415	typical catalase Group 7	MSKCPFHHTSLTMNNGAPVVDNQNSLTAGPRGPLLAQDLWLNEKLANFVREVIPERRMHAKGSGAFGKFTVTHDITQYTKAAIFSEVGKETELFARFTTVAGERGAADAERDIRGFAVKFYTEQGNWDLVGNNTPVFFLRDPRKFPDLNKAVKRDPRTNMRSATNNWDFWTLLPEAFHQVTIVMSERGIPASYRHMHGFGSHTYSMINADNERFWVKFHFRTQQGIKNLTNEEAAAIIANDRESHQRDLYEAIEKGDFPKWTLYIQVMPEADAEKVPYHPFDLTKVWPKSDYPLIEVGVMELNRNPANFFADVEQSAFAPSNLVPGISVSPDRMLQARLFNYADAQRYRLGVNHHQIPVNAPRCPVHSNARDGQGRVDGNYGSTLHYEPNSFGQWQEQA…
ASU28_08410_ALO04370.1	ALO04370.1	CP013130.1	Lactobacillus paraplantarum	typical catalase Group 6	MADKLTTEAGQPWANNEHSQTAGSRGPVLMQDYDLLEKLAHFDRERIPERVVHAKGAGAKGYFELLNDMSAYTKADLFNGVGKKTPLIMRFSQVAGEKGYPDTVRDVRGFSMKFYTQEGNYDIVGNNTPIFFVNDPLKFPDFIHSQKRDPKTNRRTQNMQWDFWSHSPESLHQVTYLMGDRGLPASFRTMNGYGSHTFKWVNQQGEQFWIKYHFIADQGVKNMTAAAAEQVTLKNLDYLQDDLYDAIETGDSPSWTLYVQIIPYQAGLDYQWDIFDVTKVVAHKDYPLIKVGRITLNENPSNNFTDIEEAAMSPANFVPGVEPSPDKLLQGRLFSYKDTQRYRLGVNFEDLPVNKPIVPVHNYERDGYMKADNQGATVNYEPNSLNGPQEVPDAAIKSV…
ASU28_14310_ALO05441.1	ALO05441.1	CP013130.1	Lactobacillus paraplantarum	typical catalase Group 6	MADKLTTEAGQPWANNQHSQTAGARGPVLMQDYDLLEKLAHFDRERIPERVVHAKGAGAKGIFELENDMGQYTKADLFNGIGKKTPVILRFSQVAGEKGYPDTVRDVRGFALKFYTQQGNYDIVGNNTPVFFVNDPLKFPDFIHSQKRDPKTNRRTQNMQWDFWAHSPESVHQVTYLMGDRGLPASYRTMNGYGSHTFKWVNRNGEQFWIKYHFISDQGVQNMTAKAAEKAMVQNVDYLQDDLYDAIQKKNYPSWTLYVQILPYEDGLNYKWDIFDVTKVISHKDYPLIKVGKLILNENPTNNFTDIEEAAMSPANFVPGIEPSPDKLLQGRLFSYKDAQRYRLGANFEDLPVNKPVVPVHNYERDGYMKIDNQGADVNYAPNSLHGPQEVPDAALASD…
AT01_1157_AJJ64920.1	AJJ64920.1	CP009781.1	Yersinia aldovae 670-83	typical catalase Group 7	MSEKKGLTTAAGAPVVDNNNVITAGKRGPMLLQDVWFLEKLAHFDREVIPERRMHAKGSGAYGTFTVTHDISKYTRAKIFAEIGKQTEMFMRFSTVAGERGAADAERDIRGFAMKYYTEEGNWDLVGNDTPVFYLRDPLKFPDLNHVVKRDPRTNLRNPTYKWDFFSHLPESLHQLTIDFSDRGLPKSYRHMHGFGSHTFSFINANNERFWVKFHFRCQQGIENLMDDEAEKLIGTDRESSQRDLYDAIERKDYPRWNLQIQVMPELEASQTPYNPFDLTKVWPHGDYPLIDVGFFELNRNPENYFAEVEQASFNPANVVPGVSFSPDRMLQGRLFSYGDAARYRLGVNHHQIPVNSAKCPFHNYHRDGAMRVDGNSGNDVTYEPNSYGRFQEQPDFSE…
AT746_04465_ALS97595.1	ALS97595.1	CP013650.1	Lacimicrobium alkaliphilum	catalase-peroxidase Group 2	MNKQPMLLRSALATLVSLTFLSGPVLAETAEMTKPKGASGTGSVKPGQARTNQFWWPEQLDLSPLRDHDGRSNPLGAEFDYAQAFSTLDLEAAKKDIDALLTTSQDWWPADFGNYGPFFIRMTWHSAGTYRTLDGRGGADGGQQRFDPLNSWPDNGNLDKARRLLWPVKQKYGEALSWADLMVLAGNVALENMGFDTYGFAGGRADDWEPDIVYWGPEVEMLASDREDRDGELQRPLGATHMGLIYVNPEGPKGKPDPMGSAKNIRTAFSRMAMNDEETVALIAGGHTFGKMHGAHKPGDCVGKEPGAAGIEEQGLGWKNKCGKGHSEDTVTSGLEGAWTQQPTRWTSLYLSNLLGFEWKQTRSPAGAIQWIPTDESLHKAVPDAHIEGKFNPPVMTTA…
AT746_19515_ALT00235.1	ALT00235.1	CP013650.1	Lacimicrobium alkaliphilum	catalase-peroxidase Group 3	MSNNNTASGGKCPVMHGGNTVSGKSNMDWWPESLNLDILHQHDRKTNPLGEDFDYAEEFSKLDLEAVKSDLKALMTESQDWWPADWGHYGGLMIRMAWHAAGSYRIADGRGGGGTGNQRFAPLNSWPDNVNLDKARRLLWPIKKKYGNKLSWADLMILAGNMAYESMGLKTFGFAGGRADIWHPEKDVYWGAEKEWLAPSDNRYEDVDNPESMENPLAAVQMGLIYVNPEGVNGNPDPLKTAAQVRETFARMAMDDEETAALTVGGHTVGKTHGNGDEKFLGPEPEAADVDEQGLGWNNHTKRGIGRDTVTSGIEGAWTTYPTKWDNGYCHLLLSYEWETKKSPAGAWQWEPVDIKEEDKPVDVEDPSIRCNPIMTDADMAMKMDPTYRKIIERFQQDF…
AT984_19215_ALT80021.1	ALT80021.1	CP013692.1	Paucibacter sp. KCTC 42545	catalase-peroxidase Group 4	MSTEAKCPFNHSAAAAASAAQAKSSRDWWPNQMKLGVLHQHSALSDPLDPGFDYAQAFKSLDLAALKQDLHALMTDSQDWWPADFGHYGPLFVRMAWHSAGTYRTGDGRGGAGAGQQRFAPLNSWPDNVNLDKARRLLWPIKQKYGQKISWADLMILTGNVALESMGFKTFGFAGGRADVWEPQEDVYWGSESTWLSDDKRYSGARDLENPLAAVQMGLIYVNPEGPGGNPDPLAAAHDIRETFARMAMDDEETVALIAGGHSFGKTHGAADAKHVGLDPEASDMAQQGMGWVNSYGSGKGSHAIGSGLEVTWTTTPTAWSNNFFENLFGYEWELSKSPAGAHQWVAKNATANTPDAFDPAKRHLPTMLTTDLSLRVDPAYEKISRRFLANPDQFADAF…
ATC03_19220_ANJ28510.1	ANJ28510.1	CP013979.1	Agromyces aureus	typical catalase Group 6	MHENLHESYPTTPTTGATTTQTGTPVASDAHSLTAGADGATALHDRYLVEKLAQFNRERIPERIVHAKGGGAFGELVVTEDVSAYTRAAVFQPGATSEMLLRFSSVAGEMGSPDTWRDVRGFALKFYTTEGNLDIVGNNTPVFFIRDAIKFPDFIHSQKRLPGSGLRDADMQWDFWTLSPESAHQVTYLMGDRGLPKSWRHVNGYGSHTYQWINAEGERFWVKYHFKARQGVENIDGIEAEAIAGADADFYRRDLYEAIERGEFPTWDVKVQVMPYADAAGYRFNPFDLTKVWPHSDYPLIPVGHFTLNRNPQNHFAEIEQAAFSPANQVPGTDISPDKMLMARVFSYPDAQRYRVGTNYNQIPVNAPHAAPVHNYSQDGAQRHGFNAPTAPVYAPNSF…
ATC04_14875_ALQ31705.1	ALQ31705.1	CP013297.1	Arthrobacter sp. YC-RL1	typical catalase Group 5	MTTESAHPTNPEADRRDKAPGQTSKHLTTSQGSPLTDTDHSLKVGERGPILLQDHHLREKIMHFDHERIPERVVHARGAGAHGKFVSYGNAADFCVADFLKPNKQTDVFVRFSTVAGSRGSMDTARDTRGFATKFYTEEGVFDLVGNNIPVFFIQDGIKFPDIVHAVKPEPDREIPQAQSAHDTFWDFVSLHTPAQAHTMWNMSDRGIPRSYRMMEGFGVHTFRMIGPGGKASLVKFHWKPKLGVHSLTWEEAQLAAGADPDFHRRDLADAIDAGAYPEWELGVQLFEDDGTATFQGIDLLDPTKFVPEELCPVQLIGKMVLDRNPSNYFAETEQVAFHPGHLVPGIDITDDPLLQARLFSYLDTQLTRLGGPNFAQIPINSPKNPVNDMFRDGYHQHN…
ATC04_16720_ALQ32019.1	ALQ32019.1	CP013297.1	Arthrobacter sp. YC-RL1	catalase-peroxidase Group 4	MSETTAGQCPVVGAGRVHPTQGNANTEWWPSKLNLKILAKNQQVSNPLDEDFDYTEAFSALDLAAVKADLAEIMTQSHDWWPADFGHYGPFFIRMAWHSAGTYRSHDGRGGGGAGQQRFAPLNSWPDNVSLDKARRLLWPVKKKYGQAISWADLILLAGNVALEDMGFETFGFGGGRKDVWEADDDVYWGPEKVWLDNERYTGKRDLEAPLAAVQMGLIYVNPEGPDGNPDPLASAIDIRETFRRMGMNDEETVALIAGGHTFGKTHGAHADDKIGPDPEAAPLEMQGLGWKNGHGTGKGADTVTSGLEVTWTYHPTRWDNEFFHILFAYEWELFESPAGAKQWRPVNGGGAGLVQPAFDTLEHREPRMLTSDLALRFDPIYGPISKNFKENPDQFADA…
ATE47_07245_ALR30330.1	ALR30330.1	CP013293.1	Chryseobacterium sp. IHB B 17019	typical catalase Group 5	MKDPKKTNEKLDQLESHSTSNDQEMLTTNQGLKINNNQDSLKAGDRGATLLEDFILREKITHFDHERIPERVVHARGSGAHGVFKLTKSLAEYTKAKFLTEVGKETPVFVRFSTVAGNRGSTDLARDVRGFAVKFYTEEGNYDLVANNIPVFFIQDAIKFPDLVHAVKPEPHNEIPQAQSAHDTFWDFISLMPESMHMIMWLMSDRAIPRSFSRMEGFGVHSFKFINEEGKVHFVKFHFKPKLGVHSVAWDEAQRISGVDPDFHKRDLWESIENGMFPEWDFGVQLIPEEDEDKFDFDLLDPTKIVPEEEVPVQLVGTLTLNKNPENFFAETEQIAFHPGHIVPGIDFSNDPLLQGRLFSYTDTQLIRLGGPNFHEIPINRSIKTVHNNQRDGYMRQQI…
ATE47_11960_ALR31191.1	ALR31191.1	CP013293.1	Chryseobacterium sp. IHB B 17019	catalase-peroxidase Group 4	MEKDLNDISKCPFHNGTMKKQSVAGGGTKNLDWWPDQLRVDILRQHSALSNPMDKDFNYAEAFKSLDLEAVKKDLHALMTDSQDWWPADFGHYGPLFIRMAWHSAGTYRVGDGRGGAGAGQQRFAPLNSWPDNVNLDKARRLLWPIKQKYGNKISWADLLILTGNIALESMGFKTFGFAGGREDVWEPDMDVYWGSEKTWLGGDLRYSHGSPGVIENHGVLPSDDDADGNIHSRDLERPLAAVQMGLIYVNPEGPDGNPDPIAAAKDIRDTFGRMAMDDEETVALIAGGHTFGKTHGAGPADHVGREPEGESIESQGIGWNSSYKSGRGGDTISSGLEVTWTETPTQWSNSFFKNLFENEWELTKSPAGAHQWVAKNGAETIPDAFDPNKKHRPTMLTT…
ATE47_18350_ALR32356.1	ALR32356.1	CP013293.1	Chryseobacterium sp. IHB B 17019	typical catalase Group 7	MDSKKLTLSNGSPYFEHQDSQTVGPRGPVLLQDFILQENLAHFVRERIPERIVHAKGSGAYGTFTVTHDISQYTKAKLFSKVGNSCRMFARFSTVGGEKGSADTARDPRGFALKFYTEDGNWDLVGNNTPVFFIKDAKKFPDFIHTQKRVPKTNLKSATMMWDFWSLNPESLHQVLILMSDRGTPYGYRHMHGFGSHTYSMINDKNERVWVKFHFVTKQGIKNFSNEDAVKMAGENPDFAQEDLCNAIENGDFPKWTMYIQIMTEEQARDFRWNPFDVTKVWFHEDFPMIEVGEMELNEVPVNYFAHVEQSTFSPSNLINGISFSPDKMLQGRLFSYPDAHRYRVGVNSHLLEVNRCPFAVNNYQRDGFMADSSQYQDKPNYHPNSFDDIKPDPSYKNY…
ATE48_12050_ANP46596.1	ANP46596.1	CP013244.1	Caulobacteraceae bacterium OTSz_A_272	catalase-peroxidase Group 3	MADGNDSKCPVPHARGRLNRDWWPNQVNVGVLHQNTPESDPMGEGFDYAKEFESLDLDAVVKDLRALMTDSQDWWPADYGHYGPFFIRMAWHAAGTYRVGDGRGGGGRGQQRFAPLNSWPDNGNLDKARRLLWPIKQKYGAKLSWADLLILTGNVAIESMGGPVFGFGGGRADVWEPENHVNWGAEEAWLADSKAPNSRYSGDRVLEGNLGAVQMGLIYVNPQGPDGNPDPVASARDIRETFARMAMNDEETVALVAGGHTFGKAHGAGPDSHVGKEPEAADLELQGLGWISTFESGLAGHTITSGIEGAWKKNPTKWDNGYLDTLFGFEWELTKSPAGAHQWKPKGDAGRDVEDAFDKNKKHQPMMTTADLALRFDPEYEKISRRFHKNPAEFADAFA…
ATM17_02230_AMU87866.1	AMU87866.1	CP013344.1	Sphingopyxis macrogoltabida	catalase-peroxidase Group 3	MNDQTPIGSGCPVHQPGGVRALLGRTNKDWWPDMLATEILNPNGSSNPLGDDFDYAAAFKSLDYQALKDDLTALMTDSQPWWPADYGHYGPFFIRMAWHAAGTYRTADGRGGANSGQQRFAPLDSWPDNGNLDKARRLLWPIKQKYGNKISWADLFILTGNVAIESMGGPVFGFGGGRVDVFEPERDIYWGSEDKWVNEGVQTRIDPDKNMVIEGPLAAIQMGLIYVNPEGPQGNPHNDEGMARDMKETFDRMAMNSEETVALTAGGHTFGKAHGNGDASTLGAAPSGGDIAAQGFGWVSGEDHGGIGEHTVTSGIEGAWTNTPREWTENYFRLLFDYDYELVKSPAGANQWQPIGQKEEDMAPDAHVPGKKVPTMMTTADMALKRDPEFRAISEKFRD…
ATN00_00660_ALR22273.1	ALR22273.1	CP013264.1	Sphingobium baderi	typical catalase Group 7	MADKPTMTTSAGAPIADNQNSLSAGPRGPLLLQDYQLIEKLAHQNRERIPERVVHAKGWGAHGVLRITGDISKFTKAKVLQPGAETPMIARFSTVAGELGAADAERDVRGFALKFYTPEGNWDLVGNNTPVFFVRDPLKFPDFIHTQKRHPRTNLRSPTAMWDFWSLSPESLHQVTILMSDRGLPTDVRHINGYGSHTYSFLNEAGERFWVKFHFKTMQGHRHWTNEEAANVVGRTRESTQEDLFEAIETGHFPQWKVQVQIMPELDAEKTPYNPFDLTKVWPHADYPPIDIGVMELNRNADNYFAEIEQAAFSPSNIVPGIGFSPDKMLQGRIFSYADAHRYRLGTHYEALPINAPKCPVHHYHKDGAMRFFPNNPNPAAYYEPNSFNGPVQDERLRE…
ATN00_12365_ALR22594.1	ALR22594.1	CP013264.1	Sphingobium baderi	typical catalase Group 5	MAKKPTRAAATRAPSNSSQAGAAAASSVTEMPVFDAPQGQGGETRQVAGNGVEALTTAQGVPVADDQNSLKQGARGPTLMEDFHFREKIFHFDHERIPERVVHARGFGAHGFFELTESLADITRADIFQRVGERTEAFVRFSTVAGSKGSFDLARDVRGFAVKLYTKEGNWDIVGNNIPVFFIQDAMKFPDLIHAAKPEPDRGFPQAQTAHDNFWDFISLTPESMHMVMWIMSDRAIPRSFRFMDGFGVHTFRLVDADGRSTFVKFHWKPKRGLQSVAWNEAVKINGADPDFHRRDLWAAIKAGDFPEWELGLQLFDQDFADSFDFDVLDATKIIPEELVPVRIVGRLVLDRRVDNFFAETEQVAFCTQNIVPGIDFTNDPLLQGRNFSYLDTQLKRLG…
ATR_0438_AXK48322.1	AXK48322.1	CP031367.1	Arcobacter trophiarum LMG 25534	typical catalase Group 7	MKKTMTTTGGNPISDNQNSITAGERGPVLLQDYQLIQKLAHQNRERIPERVVHAKGSGAFGVLEIENDISKYTKAKVLQKGEKTKLLLRFSTVAGEKGAADAERDVRGFALKFYTKEGNWDLVGNNTPVFFVRDAYKFPDFIHTQKRDPQTNMRSNTAMWDFWSLSPESLHQVTILMSDRGLPKSYRNVNGYGSHTYSLINSKNERFWVKFHFKTLQGIETITNKEAEALVGKDRESNQRDLFENIEKKNFPKWSFEIQIMTDEEAKKCSFNPFDLTKVWPHGDYPMIKVGTMTLNENPQNYFQQVEQASFSPSNIVPGISFSPDKMLQARIFSYPDAQRYRVGTHYEMLPVNRPIVEVNTYNLDGSMNFQIKEPTKAFYEPNSFDGAVEDSNFLEPDL…
ATSB10_12680_AND68722.1	AND68722.1	CP014841.1	Dyella thiooxydans	catalase-peroxidase Group 4	MSSEAKCPFHPAATGTTNRDWWPNQLRLELLSQHSEKSDPLGRSFDYRKAFAKLDYAALKKDLLAMMTDSKDWWPADFGSYAGLMIRMAWHAAGTYRIGDGRGGAGRGQQRFAPLNSWPDNVSLDKARRLLWPIKQKYGQKISWGDLMILAGNVALESTGFRTFGFAGGREDVWEPDQDVSWGSETEWLALSNTPDSRYSHGKPGERNLDNPLAAVQMGLIYVNPEGPDGNPDPVAAAHDIRETFARMAMDDEETVALIAGGHTLGKTHGAAPASHVGADPESAPLEQQGFGWTNSFASGVGKDAITSGLEVTWTRTPVQWSNDYFKFLFDFEWELEKSPAGAQQWVAKGSEAIIPGPSADSPKRRPTMLTTDLSLRFDPAYEKISRRFRDDPQAFAEA…
ATY27_01555_ALZ74570.1	ALZ74570.1	CP013656.1	Rheinheimera sp. F8	typical catalase Group 5	MAMHKQPAEPTTAKNQPPGDLSAASPIENDGVLTTNDIVAQQAKASDRLASAIVYNSNKSLGYGDDQSVTAAPGITAETDAAVLTASTATEHSGTTKTGSAARSGINAMTTAMNRVRVDGSDQPLITNQGVRISDNQHSLTAGVRGPTLLEDFVLREKLTHFDHERIPERILHARGSGAHGYFEAYEGLTKYTRAAPFAEPGKITPVFVRFSTVAGERGSKDTARDARGFAVKFYTDEGNWDLVGNNIPVFFIQDAMKFPDLVHAVKPEPHHGMPQAASAHDTFWDFVSLMPESTHMLMWLMSDRGIPRSYRMMQGFGVHTFRLVNDLGQSVFCKFHWKPLQGTHSLVWDEAVQISGADPDFHRRDLWEAIESGEFPQWELGLQIFTEAQAEAFSFDVL…
ATY27_03070_ALZ74836.1	ALZ74836.1	CP013656.1	Rheinheimera sp. F8	typical catalase Group 4	MYKKTLVAIAILTQISGSFTLQAQTLTKDNGAAVGDNQNSITAGPNGSTLLQDVHLIQKLQRFARERIPERVVHARGTGAHGEFVVTQAIPDLTIASLFAEAGKKTPVFVRFSTVIHGNHSPETLRDPRGFATKFYTDQGNWDLVGNNLPVFFIRDAIKFPDMVHSLKPSPVDNMQDPNRVFDFMSQDPASTHMLTQVYSDLGTPASYREMDGFGVHAFKFINAKGETTYVKFHWKSQQGIKSLNADQVAKVQSMDFNHLTRDLYKEINAGNFPKWDLYVQTLQPEQLDDFSFNPLDATKVWPGVAETKVGTMTLNRMPDNFFQETEQAAFAPANLVPGIEPSEDRLLQGRIFSYSDTQMYRLGANHQQLPINRPLVAVNSNNQDGAMNYGNTKSNVNY…
ATY27_05520_ALZ75268.1	ALZ75268.1	CP013656.1	Rheinheimera sp. F8	catalase-peroxidase Group 3	MDTNKSTGGKCPVMHGANTNAANATMNWWPNALNLDILHQHDSKTNPMAPGFNYAEAFKTLDLEAVKTDLKTLMTDSQDWWPADWGHYGGLMIRLAWHSAGTYRIADGRGGGGTGSQRFAPLNSWPDNGNLDKARRLLWPVKRKYGNKLSWADLMILAGNMAYESMGLKTFGFAGGREDIWHPEKDIYWGSEKQWLQASGGEGSRYSGERDLENPLAAVMMGLIYVNPEGVDGNPDPLKTAQDMRVTFARMAMDDEETAALTAGGHTVGKAHGNGKAEHLGAAPEGEDLEAQGFGWLNKSGRGIGRDTVTSGIEGAWTTNPTQWDNGYFYLLFTYDWALTKSPAGAWQWEPVNIKEEDKPVDVEDPTIRRNPIMTDADMALKMDPVYRQIAEKFYADPA…
ATY27_11425_ALZ76306.1	ALZ76306.1	CP013656.1	Rheinheimera sp. F8	catalase-peroxidase Group 3	MDTNKSTGGKCPVMHGANTNAANATMNWWPNALNLDILHQHDSKTNPMAPGFNYAEAFKTLDLEAVKTDLKTLMTDSQDWWPADWGHYGGLMIRLAWHSAGTYRIADGRGGGGTGSQRFAPLNSWPDNGNLDKARRLLWPVKRKYGNKLSWADLMILAGNMAYESMGLKTFGFAGGREDIWHPEKDIYWGSEKQWLQASGGEGSRYSGERDLENPLAAVMMGLIYVNPEGVDGNPDPLKTAQDMRVTFARMAMDDEETAALTAGGHTVGKAHGNGKAEHLGAAPEGEDLEAQGFGWLNKSGRGIGRDTVTSGIEGAWTTNPTQWDNGYFYLLFTYDWALTKSPAGAWQWEPVNIKEEDKPVDVEDPTIRRNPIMTDADMALKMDPVYRQIAEKFYADPA…
ATY38_06890_ALQ50977.1	ALQ50977.1	CP013341.1	Nitrosomonas ureae	typical catalase Group 7	MSDSKKLTTAAGVPVPDNQNTMTVGPRGPALLQDIWLLEKLAHFDREVIPERRMHAKGSGAYGTFTVTHDITRYTRAKIFSHIGKKTDLFARFTTVAGERGAADAERDIRGFAVKFYTEEGNWDMVGNNTPVFFMRDPLKFPDLNHAVKRDPRTNMRSAKNNWDFWTLLPEALHQITIVMSDRGIPASYRTMHGFGSHTFSFINAGNERFWVKFHFKSQQGIKNLTDAEAEAIIGKDRESHQRDLYEAIGRGDFPRWVLQIQIMPEAAASQLPYNPFDLTKVWPHKDFPLIEVGVMELNRNPENFFAEVEQSAFNPANVAPGISFSPDKMLQARLFSYGDAQRYRLGVNHHLIPVNAPRCPFHSYHRDGQMRVDDNHGATLGYEPNSYGEWQEQPDFRE…
ATY39_05130_AMW98888.1	AMW98888.1	CP014806.1	Rummeliibacillus stabekisii	typical catalase Group 5	MAQDKSIKTNVNENSKNEQLENYRVSNMGKPLTTNQGRKVSNDAEILTAGERGPSLQQDYYYFEKMTKFVREPIPERKVHARGYGAHGEFECYESMKELTKAGFLQEAGKKTPLFVRFSTVQGSRGSKDTARDLRCLGVKFYTEEGNYDLTSIAMPVLINTDPMKFPDVIHAYQAEPRTGMPTGAGAHDTFWDYVANNPEALHMALWVMSDRGILRSYRMMESWAINTYLFVNEEGVPTFVRFVWKPVLGVHSILQDEAQKIGGIDPDYHRRDLREAIDKGAYPEYELGVQLISQEDEHKFDFDILDPSKFWPEELVPVKLIGKMTLNRNVDNEFAEIEQVAFNPANVVPGIDFSNDPVLQGRLIAYQSAQYHRLGSSNFQDLPINRPVCPFHNNSQQG…
ATY39_05975_AMW99045.1	AMW99045.1	CP014806.1	Rummeliibacillus stabekisii	Mn-catalase Group 04	MYYYKNELINIIKPGKPDPQAARVMQEILGGHYGEMRTMMQYFFQSSNFRGKETQYRDLLRGVFLEEIAHVELVQNTINQLLNDSGESSAPGNNGLDQAPLDDAVKHANPHHYIMAAQSSLPVDAAGNPWNGSWVYAHGNLIGDLLDNLVLESTGVLQKTRIYEMSSNQTFRETLAFLIVRDNAHQNAFAKALETLGVDWGKLFPVPNYDINKYPECRKYVEMGYHNAQFNFRLDPTRIGEIFQGQSPSRNGGELNVTPPPEGFAVPVLPEMPSEHSPGLKDMNN
ATY39_06480_AMW99135.1	AMW99135.1	CP014806.1	Rummeliibacillus stabekisii	typical catalase Group 5	MQKRDDDYERSILADKKINSSINKKTKKRQERNTIKQELYLREKVNFDSEQIPERVLYANGIGAYGQFELYESLEEYTKASFLTNPSNITPVFVRFSSMQSSRGTNDTQRDVKGFATKFYTEEGNFDLVGNNVPIFYIHNTRKFHELVRAVKPDLNQEFVNGTNPHDQFWTFAAKNPETAHMVMWQMSDRTIPRSYRMMEGFGVHTFRLVNRKGKTHFVKFHWKPSLGVHSLVWDEAQKIGGKNPNFLSQDLLEAIKKGDYPEWELGLQLISEEDQFSYDFDILDPTKIWPEEDVPVKIIGKMTLNRNVDNGFLETEHVAFHPGHLVPGIEISEDPLLQGRILSYTDAQVERLRGPNFLQIPINQPICPFQNNNNNNNGFLIPQATNEQQAPTPKNQGF…
ATY39_06595_AMW99157.1	AMW99157.1	CP014806.1	Rummeliibacillus stabekisii	typical catalase Group 3	MSENKKQNKQQQDVERETLTTRQGHPVTDNQNIRTVGNRGPATLENYHFIEKISHFDREEVPERVVHARGSGAFGYFETYGKVGDEPVEKYTRAKVFSGKGKRTPLMVRFSTVAGSKDSPETDRDPRGFAVKMYTEDGNWDLVGNNLKIFFIRDAMKFPDMIHAFKADPASNVPNPQRMFDFVARTPEATHMITFLFSPWGIPATYRHMQGSGVNTYKWVNEKGEAVLVKYHWEPKQGIRNLTQEEAHQIQSKNVGHATQDLYEAIERGDYPEWELYVQIMEDDYHPELDFDPLDDTKLWPEDKFPWLPVGRMVLDRNPVNFHEEIEQAAFGTGVLVDGMDFSDDKMLQGRTFSYSDTQRYRIGSNYLKLDVNAPKVPVHTNQQRGQMDTRDPQESGEN…
ATY39_12445_AMX00155.1	AMX00155.1	CP014806.1	Rummeliibacillus stabekisii	typical catalase Group 5	MDKYSQNKKSVKKDAKQEQLDQYRKSNAGKPLATQEGRKISNDSETLKAGVRGPSLHEDYWYLEKMSHFVHEEIPERVVHARGYGAYGEFECYQSMEHVTEACLFQEPGKKTPLAVRFSTVQGPKGSYDTARDLRCLGVKFYTEQGNYDLTTIAMPVLINQDPMKFPDAMHAYQSKQSDDIPTATGAHDRFWDYVANNPEALHMVTWIMSDRGIIENYRVMESWSINTYLFVNKKGVATFVRFVWKPVLGVHSLLQDEAIKIGGIDPDFHRKDLREAIDKGAFPEYELGVQLISMEDEFNFDFDVLDPAKFWPEELVPVQLIGKMTLNRNIDNYFSESEQIAFNPANVVPGIGFSNDPVLQGRLIAYRDAQQHRLGSANYLELPVNKPLCPFHNNQRRG…
ATY39_15800_AMX00733.1	AMX00733.1	CP014806.1	Rummeliibacillus stabekisii	typical catalase Group 7	MANDQNKKLTTAAGAPVVSNTNSMTAGKRGPVLLQDVYLIEKLANFNREVIPERRMHAKGSGAFGTFTVTHDITKYTKAAIFSEVGKKTDMFARFSTVAGERGAADAERDIRGFALKFYTEQGNWDLVGNNTPVFFFRDAMHFPDLNHAVKRDPRTNMRSANNNWDFWTNLPEALHQITYVMGDRGIPTDYRHMHGFGSHTYSMINANNERVYVKFHFETQQGIKNYTDQEAAEVVANDRESSQRDLYEAIERGEFPKWKMSIQVMTDEQARNHRDNPFDLTKVWYKSEYPLIPVGEFELNRNAENYFADVEQAAFQPSNVVPGISFSPDRMLQARLFSYADAQRYRLGVNNFQIPVNAPKCPVHNFHRDGAMRVDGNLGSTLHYEPNSYGEWKEQPEF…
AU14_11005_AHI28953.1	AHI28953.1	CP007151.1	Marinobacter similis	catalase-peroxidase Group 3	MTSSTNQSGAGKCPVMHGAQTKMDSRGPSVADWWPNQLNLNILHQHSPRSNPLGEDFDYAEEFKKLDLAAVKKDLADLMTDSKDWWPADYGHYGAFFIRMTWHSAGTYRQGDGRGGAATGNQRFAPINSWPDNGNLDKARRLLWPIKQKYGNKLSWADLFILTGNVAMETMGFKTFGFGGGRADIYQPEEDIYWGAEHEWLATSDKADSRYSGERDLENPLAAVQMGLIYVNPEGPDGNPDPLASAHDIRETFARMAMNDYETVALTAGGHTFGKTHGAGDPAHVGPEPEAAPMEEMGLGWRNSYGTGKGRDAITSGLEGAWTANPTKWDMGYFDVLFKYDWELTKSPAGANQWKPVGLTESDMAPDPEDPSKKVPIMMSTADMAMKMDPEYRKISEHF…
AU252_16260_ALV42505.1	ALV42505.1	CP013747.1	Pseudarthrobacter sulfonivorans	typical catalase Group 6	MTANISTTQSGAPVTSDAHAQSVGADGAIILTDHYLIEKLAQFNRERVPERVVHAKGGGAFGTFKATSDISKYTKAAFLQPGVETEMLIRFSSVAGENGSPDTWRDPRGFAVKFYTSEGNYDLVGNNTPVFFIRDGIKFPDFIHSQKRLPGTHLRDADMQWDFWTLSPESAHQVTWLMGDRGLPASWREMQGYGSHTYQWINAEGERFWVKYHFKSNQGVKTISGDQAEELAGSDADFYIRDLQDNIAEGNFPSWELHVQVMPYEDAKGYRFNPFDLTKVWPHSDYPLIHVGTMELNKNPENYFAQIEQATFAPSNFVPGIAASPDKMLQARIFSYADAHRYRVGTNHAQIPVNQPKNQVNNYSQDGAGRYHFNAPSVPVYAPNSFNGPAAVEPASPAG…
AUC31_10665_ALS75629.1	ALS75629.1	CP013659.2	Planococcus rifietoensis	catalase-peroxidase Group 3	MDNNEQKRHTAASDAQCPITGAGGQQPTSQTGGHQDSAITTSNKPGKTQNKDWWPNMLNLNILHQHDTKTNPLGIEFDYQAEFEKLDYDALKQDLRDLMTNSQEWWPADYGHYGGLFIRMSWHAAGTYRTTDGRGGGSTGNQRFAPLNSWPDNVNLDKARRLLWPIKKKYGNKISWADLLVLTGNVALESMGFKTFGFGAGREDIWAPEEDVYWGNEKEWLADNRYSGDRELENPLAAVQMGLIYVNPEGPNGKPDPLASAVDIRETFARMGMNDEETVALIAGGHTFGKAHGAGDPSNVSDDPEAAVMENMGLGWKSSYGSGKGRDTISSGIEGAWTANPIQWDNGYYEQLLGYEWELTKSPAGAYQWTAVDLSEEQMAPDAEDSSIKVKTMMTTADM…
AUC31_12620_ALS75988.1	ALS75988.1	CP013659.2	Planococcus rifietoensis	typical catalase Group 3	MKDHNEELKNKMSEGENEETLTNRQGHPVKDNQNLRTVGNRGPATLENYNFIEKISHFDREEIPERIVHARGAGAFGYFETYGTVGDEPVEKYTRAKVFSGKGKQTPLLVRFSTVAGSRHSPETARDPRGFAVKMYTEDGNWDLVGNNLKIFFIRDAMKFPDMIHAFKNDPVSNVPDPERMFDFVARSPEATHMITFLFSPWGIPATYRHMQGSGVNTYKWVNDKGEAVLVKYHWEPKQGIRNLTQAEADEIQAKNVGHATEDLYDSIENGDYPEWELFVQIMSDDEHAELDFDPLDDTKLWPMDKFPFLPVGKMVLNRNPENYHAEIEQAAFGTGVLVDGMDFSDDKMLIGRTFSYSDTQRYRIGANYLKLPVNAPRKRVATNQYGGAMDVPRGENAK…
AUC31_13375_ALS76121.1	ALS76121.1	CP013659.2	Planococcus rifietoensis	typical catalase Group 5	MAHDPKKFDENSKNEQLEQFRSDDSGKDLTTNQGLKLSEDEFSLKAGERGPTLMEDFHFREKMTHFDHERIPERVVHARGFAAHGEFEAYESLEHLTKAKFLSKKGKKTPVFVRFSTVAGSRGSAETVRDARGFSTKFYTEEGNYDLVGNNIPVFFIQDAIKFPDLVHAIKPEPHNEIPQAATAHDTFWDFVANNQESAHMVMWTMSDRAIPRSLRTMDGFGVHAFRFVNAEGKSHFVKFNWKSTLGVHSLVWDEAQKINGKNPDFHRADLHEAIESGDYPEYELGVQIVPEEDEHKFDFDLLDATKMWPQEEIPIHIVGKMTLNRNVDNVFAEAEQVAFHPGHVVPGIDFSNDPLLQGRLFSYTDTQLIRLGGPNFHELPINRAVCPFHNNQRDGYGR…
AUC43_07105_ALW84877.1	ALW84877.1	CP013909.1	Hymenobacter sedentarius	typical catalase Group 3	MSQEQDQTRGANAGENGTAVTGAGSSQDGRLAAGENANTLTTRQGHPVYDNQNLRTVGNRGPATLENYQFLEKISHFDRERVPERVVHARGAGAHGIFEAYGKVGDEAIDKYTRAKLFNTPGKETPVFVRFSTVGHGGHSPETLRDPRGFAVKFYTEDGNWDLVGNNLKVFFIRDALKFPDLIHSQKPDPVTNRQSGERIFDFICNTPEAMHMVSFLFSPWGIPANYRQMQGSGVNTYKWVNKEGVGVLVKYHWEPLQGIKNLTQPEAEAIQAKNFNHATQDLYEAIKAGNFPQWELRVQIMSDDEHPELDFDPLDDTKIWPEDQFPHLPVGKMTLNKNPENYFAEVEQAAFGTGVLVDGLDFSDDKMLQGRTFSYSDTQRYRVGTNYLQLPINAPKKH…
AUC43_19130_ALW87007.1	ALW87007.1	CP013909.1	Hymenobacter sedentarius	Mn-catalase Group 07	MILRLDELALDLPAPKNPSANDAAAVQELLGGKYGEMSTLMNYTFQSFNFRGRDRLRPFYSLTAAIAAEEYSHIEAVSYAINLLLTGVSRRNPDPAAAPLAGAADARNTYHFIASGQSSLPIDSMGRPWTGDNVFSSGNLRLDLLHNFFLECGARANKMRVYEMVTDPCARTMVGYLLVRGGLHVYAYAMALEKLTGVDVKKLMPIPTLSNAKFPEARAFMKHGLHRELYTFSPNAYMEAGLIWNGTHPEDGSELVVIPGAKKGVPYPVLEEEPQLNAPGEDDGFDPEMFGDMAKKLGLEKELRNYH
AUMI_14420_BAU98984.1	BAU98984.1	AP017457.1	Aurantimicrobium minutum	catalase-peroxidase Group 3	MSDESKCPYLGGTSSSSGTSNNDWWPNQLNLDSLTHNSPKSDPMDPDFDYATEFKSLDLAAVKKDIYELMTSSQDWWPADYGHYGPFFIRMAWHSAGTYRISDGRGGAGQGLQRFAPLNSWPDNVNLDKARRLLWPVKKKYGKKLSWADLMILAGNCAIEDMGLKTFGFGGGRADVWEADDTYWGPEAEWLANKRYSGDRDLENPLAAVQMGLIYVNPEGPDGNPDILASARDIRETFARMAMDDEETVALIAGGHTFGKAHGAADADKYVGPEPEGAPIEEQGLGWKNSYGTGNGADTISSGLEGAWTPNPTKWDNGYFETLFGYEWVMTKSPAGAIQWVPSDESAASLVPDAHIAGKTHAPVMFTTDLALRTDPAYEKISRHFLENPDAFADAFARA…
AUO94_00575_ALS77228.1	ALS77228.1	CP013661.2	Planococcus kocurii	catalase-peroxidase Group 3	MENNEEKRHTAAGEGQCPVTGGHKDSAITTSNKPGKTQNKDWWPNMLNVNILHQHDTKTNPLGEAFDYKAEFEKLDYEALKQDLHKVMTDSQDWWPADYGHYGGLFIRMSWHDAGTYRTADGRGGGSTGNQRFAPLNSWPDNVNLDKARRLLWPIKQKYGSKISWADLLLLTGNVALESMGFKTFGFGAGREDIWAPEEDVYWGNEKEWLEDNRYSGERDLENPLAAVQMGLIYVNPEGPNGKPDPLASAVDIRETFARMGMNDEETVALIAGGHTFGKAHGAGDPAEVGDDPEAAVMENMGIGWKSTHGSGKGRDTISSGIEGAWTANPTKWDNGYYEQLFEYEWELTKSPAGAYQWTAKDLSEHQMAPDAEDASIKVKTMMTTADMALRMDPAYEKI…
AUO94_02890_ALS77653.1	ALS77653.1	CP013661.2	Planococcus kocurii	typical catalase Group 5	MTKQPEVNKNSKDEQLEQYRVDDSGKSLTTNQGLKMAEDEFSLKAGERGPTLLEDFHFREKMTHFDHERIPERVVHARGYAAHGVFETYDSLEHLTKAKFLSEKGKKTPVFVRFSTVAGSKGSAETVRDLRGFATKFYTEEGNYDLVGNNVPVFFIQDAIKFPDFVHAVKPEPHNEMPQAASAHDTLWDFVINNQETAHTMMWLMSDRAIPRSFRMMDGFGVHAFRFINAEGKSHFVKFSWKSTLGTHSLVWDEAQKISGKDPDFNRRDLYDSIEQGDFPEWELGVQIVAEEDEYKFDFDLLDATKLWPQEEIPMQMVGKMTLNRNVDNVFAETEQVAFHPGHVVPGIDFSNDPLLQGRLFSYTDTQLLRLNGPNFHELPINRPVCPFHNNQRDGFGRQ…
AUO94_15485_ALS79935.1	ALS79935.1	CP013661.2	Planococcus kocurii	typical catalase Group 6	MTTNKTGLTTSWGAPVGDNQNSQTAGQRGPILLQDVHLLEKLAHFNRERIPERVVHAKGTGAHGYFEVTQDVSTYTKAAFLSEVGKKTEMFARFSTVAGELGSADTVRDPRGFSLKFYTEEGNYDLVGNNTPIFFIQDAIKFPDFIHTQKRDPRTHLKNPNAVWDFWSLSPESLHQVTYLMGDRGIPATLRHMHGFGSHTFKWTNAEGESVWVKYHMLTEQGIQNITQEVADKIAGENPDFHTEDLFNSIEEGDFPAWKMYVQVMPLEDANTYRFDPFDVTKTWSHKDYPLMEVGRMVLNRNPENYFAEVEQATFSPGTLVPGIDVSPDKMLQGRLFAYHDAHRYRVGANHQMLPINAAKNQVNNYQRDGQMNFGNNGGGSVYYEPNSYGGPTETAAAK…
AUP74_01954_AOS97384.1	AOS97384.1	CP014143.1	Microbulbifer aggregans	typical catalase Group 6	MKKDDRNRTTTDAGIPVASDEYSLTVGPEGPIVLHDHYLIEQMANFNRERIPERQPHAKGSGAFGHFEVTQDVSAFTKAAVFQPGTKTDTLIRFSTVAGERGSPDTWRDPRGFALKFYTSEGNYDMVGNNTPVFFLRDPMKFQHFIRSQKRRADSGLRDHDMQWDFWTLSPESAHQVTWLMGDRGIPRTYRHMNGYSSHTYLWVNKDGERFWVKYHFKTDQGIECLTQEEADRIAGEDSDAHRRDLFDAIARGDYPSWTLKVQIMPFAEAENYRFHPFDLTKVWPHDDYPLQEVGRLTLDRNPTDFHTEIEQAAFEPNNTVPGIGFSPDKMLLARVFAYADAHRARMGVNYKQIPVNAPKCPVHSYSKDGAMRVQNVADPVYAPNSKGGPSADHTYTEK…
AUP74_02159_AOS97575.1	AOS97575.1	CP014143.1	Microbulbifer aggregans	catalase-peroxidase Group 2	MFKKALPLAVALATAISVNVNAESQSGVAMSNQDWWPNKLDLAPLRLHAEKSNPMDEDFDYAEAFSKLDLDVVKKDIETVLTTSQDWWPADYGHYGPFFIRMAWHSAGTYRVYDGRGGAGGGQQRFEPLNSWPDNVNLDKARRLLWPVKQKYGNSISWADLMVLAGNVSLESMGFETFGFAGGREDDWEADVVYWGSEREWLGNDKRFKGDKLEKPLAADRMGLIYVNPEGPNGNPDPKAAAVRIRETFGRMAMNDEETVALIAGGHTFGKAHGAHKGDCLEEAPGGAGMEEQGFGWKNKCGKGNAEDTVTSGLEGAWSANPIAWSTQFLDNLFGFEWVKTKSPAGATQWEPENAAQVKFVPDAHVKNKRHAPMMFTTDLSLRFDPEYRKISERFQKNP…
AUP74_02305_AOS97713.1	AOS97713.1	CP014143.1	Microbulbifer aggregans	catalase-peroxidase Group 2	MLNNKSIGAVLALSASLFFSPGLIQAQEQPPLEAVGNPEGPSQKRMQGAPKSNQFWWPDQLDLAPLRDHGAESNPLGEDFNYAKAFNSLDLKAVKKDIETTLKTSQDWWPADYGHYGPLMIRMAWHSAGTYRVADGRGGAGGGQQRFDPLNSWPDNANLDKARRLLWPVKQKYGEALSWADLMVLTGNVALESMGFKTFGFGGGRVDDWEPDLVYWGPETKMLDAEKRFKGGKLDNPLAATVMGLIYVNPEGPNSSGDPVAAGERIRLSFGRMAMNDEETVALIAGGHAFGKNHGAVKADCVGPEPAAAPIQEQGFGWKNKCGKGNASDTFTSGLEGAWTVSPIQWSNNYLQNLYNFEWKQVKSPAGAIQWIPKDPNAANLVPDAFDPKKRHAPVMLTT…
AURMO_00283_AWR20902.1	AWR20902.1	CP023994.1	Aurantimicrobium sp. MWH-Mo1	catalase-peroxidase Group 3	METAGKCPVIHGAQTTTGKSNMDWWPNALNLDILHQQDTKTNPLGEGFDYRAQVRQLDVAALKKDLTNLMTDSQSWWPADWGHYGGLMIRMAWHSAGSYRTADGRGGAGNGNFRFAPLNSWPDNVNLDKARRLLWPIKRKYGNKLSWADLFILAGNVAYESMGLKTFGFGFGREDIWHPELDVYWGSEKEWLAPSDSRYGNLEDPSTMENPLAAVQMGLIYVNPEGVNGNPDPLKTAQQIRETFARMAMNDEETVALTAGGHTVGKAHGNGDAGNLGPSPEGADIQEQGLGWMNHTTRGVGRDTVSSGIEGAWTTNPTQWDNGYFYLLFNYDWELTHSPAGAQIYHPINIKEEDKPVDVEDPSIRLMPMMTDADMAMVKDPAYRAISERFYNDPAYFSE…
AURUGA1_00951_AXE54636.1	AXE54636.1	CP030929.1	Aurantimicrobium sp. MWH-Uga1	catalase-peroxidase Group 3	MSDESKCPYMGGTSSSTGTSNNNWWPNQLNLDSLTHNSPKSDPMDSDFDYATEFKSLDLAAVKKDIYALMTSSQDWWPADYGHYGPFFIRMAWHSAGTYRISDGRGGAGQGLQRFAPLNSWPDNVNLDKARRLLWPVKKKYGKKLSWADLMILAGNCAIEDMGLKTFGFGGGRADVWEADDTYWGPEAEWLANKRYSGERDLENPLAAVQMGLIYVNPEGPDGNPDILASARDIRETFARMAMDDEETVALIAGGHTFGKAHGAADADKYVGPEPEGAPIEEQGLGWKNSFGTGNGADTISSGLEGAWTPNPTKWDNGYFETLFGYEWVMTKSPAGAIQWVPSDESAASVVPDAHIQGKTHAPVMFTTDLALRTDPAYEKISRHFLENPDAFADAFARA…
AUT26_09980_AMB40497.1	AMB40497.1	CP014196.1	Arthrobacter sp. ATCC 21022	typical catalase Group 5	MPNEDNVRIPGAPSSEPASVEEPTGPREPLPPKPDQQAPEAVSPTGSPTGAPANARAQSGQYLTTAQGLRLADTDHSLKAGSRGPTLLQDHHLREKITHFDHERIPERVVHARGAGAHGVFRSYGTASKVTKAGFLAADVETPVFVRFSTVLGSRGSADTVRDTRGFSTKFYTDEGTYDLVGNNIPVFFIQDGIKFPDIVHAAKPHPDREIPQAQSAHDTFWDFVSLHTEAQAHTLWNMSDRGIPRSYRTMEGFGVHTFRLVNADGETTLVKFHWKPKQGVHSLVWEEAQIINGMDPDFHRRDLADAIEAGAYPQWELGIQAFPDTEDQMFEGIDLLDPTKFIPEELAPVQPIGLMTLNANPTNYFAETEQVAFHPGHLVPGIDVTNDPLLQVRLFSYL…
AUT26_15015_AMB41368.1	AMB41368.1	CP014196.1	Arthrobacter sp. ATCC 21022	typical catalase Group 6	MTAISTTQSGAPVTSDAHSKSVGADGAIILTDHYLVEKLAQFNRERVPERVVHAKGGGAFGTFKTTSDVSKYTKAAFLQPGAETDMLIRFSSVAGENGSPDTWRDPRGFAVKFYTSEGNYDLVGNNTPVFFIRDGIKFPDFIHSQKRLPGSHLRDADMQWDFWTLSPESAHQVTWLMGDRGLPASWREMQGYGSHTYQWINAAGERFWVKYHFKSNQGVNSITGEQAEALAGSDADFYIRDLYENIEAGNFPSWELHVQVMPYEDAKTYRFNPFDLTKVWPHADYPLIHVGTMELNKNPENYFAQIEQATFAPSNFVPGIAASPDKMLQARIFSYADAHRYRVGTNHAQIPVNQPKSPVHNYSQDGQGRYLFNAPTTPVYAPNTVGGPAAVEPASPAGG…
AV541_09700_AMA76148.1	AMA76148.1	CP014141.1	Thermus parvatiensis	Mn-catalase Group 07	MFLRIDRLQIELPMPKEQDPNAAAAVQALLGGRFGEMSTLMNYMYQSFNFRGKKALKPYYDLIANIATEELGHIELVAATINSLLAKNPGKDLEEGVDPVSAPLGFAKDVRNAAHFIAGGANSLVMGAMGEHWHGEYVFTSGNLILDLLHNFFLEVAARTHKLRVYEMTDNPVAREMIGYLLVRGGVHAAAYGKALESLTGVEMTKMLPIPKIDNSKIPEAKKYMDLGFHRNLYRFSPEDYRDLGLIWKGASPEDGTEVVVVDGPPTGGPVFDAGHDAAEFAPEFHPGELYEIAKKLYEKAK
AV903_15125_AXF77051.1	AXF77051.1	CP013970.1	Erwinia tracheiphila	typical catalase Group 4	MINDPIAGGFNNRKKLLIVLTSLAISQMAMAETLTRDNGAPVGDNQNSQTAGANGPVLLQDVQLLQKLQRFDRERIPERVVHARGTGAHGEFTATADISDLTTAKVFSVGSKTPVFVRFSSVVHGNHSPETLRDPRGFATRFYTTEGNWDLVGNNFPTFFIRDAIKFPDMVHAFKPDPRTNLDNDSRRFDFFSHLPESTRTLTLLYSNEGTPASYRNMDGNSVHAYKFVNSKGEVHYVKFHWKTLQGIKNLDPKQVEQVQGKDYSHMTHDLVTAINRGDYPKWDLYIQVLKPEDLKKFDFDPLDATKIWPGVPERKIGQMVLNKNPDNVFQETEQVAMAPSNLVPGIEPSEDKLLQGRLFAYADTQLYRIGANGLSLPINRPHSPVNNGNQDGSLNSGN…
AV903_25150_AXF78543.1	AXF78543.1	CP013970.1	Erwinia tracheiphila	catalase-peroxidase Group 4	MTTSTDTHDSPSAGKCPFHQGKQEQHAGGGTTNRDWWPNQLRVDLLNQHSERSNPLGKNFNYRHEFSKLDYFALKGDLKALLTDSQPWWPADWGSYIGLFIRMAWHSAGTYRSEDGRGGSGRGQQRFAPLNAWPDNVSLDKARRLLWPIKQKYGQKISWADLYILAGNVSLESAGFRTFGFGAGREDVWEPDLDVDWGSEKTWLAHRHPESLAQTPLGATEMGLIYVNPEGPEHSGDPASAAPAIRATFGNMGMDDEEIVALIAGGHTLGKTHGAAPASHVGADPEAASIESQGFGWASTHGSGVGADAITSGLEVIWSQTPTQWSNYFFENLFKYEWVQTRSPAGAIQFEAVDAEEIIPDPFDKAKKRKPTMLVTDLTLRFDPEFEKISRRFLNNPQA…
AV940_11845_AMJ91103.1	AMJ91103.1	CP013933.1	Alteromonas sp. Mac2	typical catalase Group 7	MAKRPQLTTSAGAPVVSNETTKTAGERGPALLQDYQLLEKLAHQNRERIPERVVHAKGWGAQGTFTVTHDITDYSCADIFSQVGKQTEVLSRWSTVAGESGAADTERDVRGFSLKFYTEQGNWDMVGNNTPVFFVRDGYKFPDFIRTQKRHPKTNLRSPEAMFDFWAGQPESVHQVTILMSDRGIPVSPMHMNGYGSHTFSMWNKDGKRHWVKFHFKTQQGIKNYTNETSEKIIGSTREKYQEELYNAIDEGNFPKWTMYIQAMPEEDAGKQAFNPFDLTKVWPHDDYPLIQVGELEMNKNPENYFQMVENAAFSPSNIVPGIGFSPDKMLQARIFSYADAHRYRLGTHYEALPANAPKNSKVNHYHKDGAMRFFTNDFGNPDAYYEPNQHEGPVADFS…
AV940_16425_AMJ91929.1	AMJ91929.1	CP013933.1	Alteromonas sp. Mac2	catalase-peroxidase Group 2	MKITRVRKATLAGLISLALGTSHSFADNEISKPAGAKGTGMVQPFQARTNNFWWPEQLNLSQLRDHDSRSNPLGDDFDYAKAFSSLDLDQVKADVNELLTTSQDWWPADYGNYGPFFIRLSWHSAGTYRTLDGRGGGDGGQMRFDPLNSWPDNASLDKARRLLWPIKQKYGKALSWGDLMILAGTVGMENMGFDTYGYAGGRTDDWEPDMVYWGPEVEMLASDREEKGGELQRPLGATHMGLIYVNPEGPKGVPDPMGSAKNIRTAFNRMAMNDEETVALIAGGHTFGKMHGAHKPADCLEAEPGGAGLEEQGLGWKNNCGKGHSEDTVTSGLEGAWTQLPTRWTSLYLQNLLGFEWKQTRSPAGAIQWIPTDESAQTAVPDAHVEGKRHAPVMTTADL…
AV940_16925_AMJ92014.1	AMJ92014.1	CP013933.1	Alteromonas sp. Mac2	catalase-peroxidase Group 3	MSNAKLGDVNDSDRKCPVMHGGLTATGSTNMDWWPEALNLDILHQHDTKTNPMGDDFDYREAVKTLDFDELKKDMIALMTDSQSWWPADWGHYGGLMIRMSWHAAGSYRIADGRGGASTGNQRFAPLNSWPDNVNLDKARRLLWPIKKKYGNKLSWADLLVFAGTVAYESMGLKTYGFAFGRADIWHPEKDTYWGAEKEWLAPSDERYNDVETPETMENPLAAVQMGLIYVNPEGVNGKPDPLKTALHVRETFARMAMNDEETVALTAGGHTVGKCHGNGSADRLGPDPEGADIVEQGLGWMNHETRSIGRDTVSSGIEGAWTTNPTQWDNGYFELLLNYDWELKKSPAGAEQWEPIDIKEEDKPVDVEDPSKRYNPIMTDADMAMKMDPIYREISEKF…
AV940_17090_AMJ92046.1	AMJ92046.1	CP013933.1	Alteromonas sp. Mac2	typical catalase Group 4	MKRSFTRSIISCVTVGMLSMSLSAQADTLTRQNGAPVGDNQNSQTAGPWGPVLLQDSHLIEKLAAFDRERIPERVVHARGVGIHGYYENYEDLSDDTVAAPFQGEGKKTEVFVRFSSVVHGHLSPETLRDPRGFAVKFYTEQGNWDLVGNNFPVFFIRDAIKFPDMVHAFKPSPVTNKQDAKRVFDFFSHVPESTHTLTMLFSDYGTPASYLNMDGSGVHAFKFVDGEGNVKYVKFTWKANQPIKNFTAEEAMKQQGMDFQPHTTDVYTRIGEKGETASWDLYLQELEPEQLDDFDFNPLDTTKIWPEKLVSSRKIGRMVLNRVPDNFFEETEQAAFAPSNLIPGIEPSEDRMLQGRLFSYADTQRYRLGVNAYRIPVNAPKNVEINNHEQHGQLRTTS…
AVI54_00765_APS62507.1	APS62507.1	CP013786.1	Piscirickettsia salmonis	typical catalase Group 7	MKMTTLTTSSGSPIADDQNSLTAGERGPVLLQDWQLLEKLAHFNRERIPERVVHAKGSGAYGTFTLTKSLSDYTIADYLQQQGEKTEVFLRFSTVGGEMGSGDAVRDPRGFAVKFYTREGNHDVVGNNTPIFFLRDPSKFPDFIHTQKRNPLTNLKDPEAVWDFWSLNPQSMHQITILMSDRGIPTDYRHMNGYGSHTFALWNQQGERFWVKWHFKTEQGVQCLTGEEAAKIAGENPDHAQEDLVKIIEAGDFPNWRVYLQIMPEKDAETYQLNPFDLTKVWPHKDYPLVEIGMLELNRNVENYFAEVEQSAFSPSNLVPGIDASPDKMLQARLFSYPDAHRYRIGANYNDLSVNCPHATRVDNYQRGGAMAGTRCPYSTTETAPSGRSGVNYGPNTKN…
AVL55_01970_AMJ97041.1	AMJ97041.1	CP014323.1	Alteromonas macleodii	typical catalase Group 7	MSKCPFSGAAIKPTTLTSSNGAPVANDNQSRTAGPRGPVTFDNHYLFEKLAHFNRERIPERVVHARGSAAYGTFTLTKSLSDYTIADFLQKEGQKTDVFLRFSTVGGGQDSSDYARDPRGFSVKFYTEKGNWDMVGNNTPVFFLRDGIKFPDFIHSQKKNPRTNLPDPQAVYEFWANNPQSLHQSTILMSDRGIPLSYRHVNGYSSHTLSFWNNAGERYWVKWHFKTNQGIKTLTSEEAAKMPAYGAQQDLVESIDNGEFPSWTVNVQIMTEEEARNYHINPFDLTKVWPHSDFPLIEVGQLELNRNVDNYFAETEQAAFAPSNLVPGIGASPDRMLQARLIGYQDAHRYRIGANYNQIPVNAPRCPVHNYQRDGAFAGINPALAGSGANFYPNNRARV…
AVL55_12280_AMK00416.1	AMK00416.1	CP014323.1	Alteromonas macleodii	typical catalase Group 7	MAKKPQLTTSAGAPVVSNETTKTAGERGPALLQDYQLIEKLAHQNRERIPERVVHAKGWGAQGTFTVTHDITDYTCADLFSEVGKQTEVLSRWSTVAGESGAADTERDVRGFSLKFYTQQGNWDMVGNNTPIFFIRDGYKFPDFIRTQKRHPKTNLRSPEAMFDFWAAQPESVHQVTILMSDRGIPVSPMHMNGYGSHTFSMWNKEGKRHWVKFHFKTQQGIKNYTNETSEKIIGSTREKYQEELYNAIEEGNFPKWTMYIQAMPEEEAGQQSYNPFDLTKVWPHDDYPLIEVGELEMNRNPENYFQMIENAAFSPSNVVPGIGFSPDKMLQARIFSYADAHRYRLGTHYEALPANAPKNSKVNHYHKDGAMRFFTNDFGNPDAYYEPNQYEGPVADFS…
AVL55_16605_AMJ99635.1	AMJ99635.1	CP014323.1	Alteromonas macleodii	catalase-peroxidase Group 2	MTINRFKKTTVSVLVALSLGATGAIANDQISKPAGAKGTGTAKAFQAKNNQFWWPDQLDLSPLRDHDNRSNPLGDDFSYAKAFAKLDLDQVKKDVNELLTTSQDWWPADFGNYGPFFIRLSWHSAGTYRTLDGRGGGDGGQMRFDPLNSWPDNGNLDKARRLLWPIKQKYGESLSWGDLMILAGTVGMENMGFDTYGFAGGRTDDWEPDMVYWGPEVEMLASDREERDGKLQRPLGATHMGLIYVNPEGPKGVPDPMGSAKNIRTAFGRMAMNDEETVALIAGGHTFGKMHGAHKPADCLEAEPGGAGLEEQGLGWKNNCGKGNAEDTVTSGLEGAWTQLPTKWTSLYLQNLLGFEWKQTRSPAGAIQWIPTDESLHKSVPDAHVEGKKNPPVMTTADL…
AVL56_12365_AMJ95012.1	AMJ95012.1	CP014322.1	Alteromonas addita	typical catalase Group 7	MAKKPQLTTSAGAPVVSNETTKTAGERGPALLQDYQLLEKLAHQNRERIPERVVHAKGWGAQGIFTVTHDITDYSCADIFSQVGKQTEVLSRWSTVAGESGAADTERDVRGFSLKFYTEQGNWDMVGNNTPVFFVRDGYKFPDFIRTQKRHPKTNLRSPEAMFDFWAGQPESVHQVTILMSDRGIPVSPMHMNGYGSHTFSMWNKDGKRHWVKFHFKTQQGIKNYTNETSEKIIGSTREKYQEELYNAIDEGNFPKWTMYIQAMPEEDAGKQAFNPFDLTKVWPHDDYPLIQVGELEMNKNPENYFQMVENAAFSPSNIVPGIGFSPDKMLQARIFSYADAHRYRLGTHYEALPANAPKNSKVNHYHKDGAMRFFTNDFGNPDAYYEPNQHEGPVADFS…
AVL56_16460_AMJ95744.1	AMJ95744.1	CP014322.1	Alteromonas addita	catalase-peroxidase Group 2	MKITRVRKVTLAGLISLALGTSHSFADNEISKPAGAKGTGMVQPFQARTNNFWWPEQLNLSQLRDHDSRSNPLGDDFDYAKAFSSLDLDQVKADVNELLTTSQDWWPADYGNYGPFFIRLSWHSAGTYRTLDGRGGGDGGQMRFDPLNSWPDNASLDKARRLLWPIKQKYGKALSWGDLMILAGTVGMENMGFDTYGYAGGRTDDWEPDMVYWGPEVEMLASDREDKGGELQRPLGATHMGLIYVNPEGPKGVPDPMGSAKNIRTAFNRMAMNDEETVALIAGGHTFGKMHGAHKPADCLEAEPGGAGLEEQGLGWKNNCGKGHSEDTVTSGLEGAWTQLPTRWTSLYLQNLLGFEWKQTRSPAGAIQWIPTDESAQTAVPDAHVEGKRHAPVMTTADL…
AVL56_16960_AMJ95831.1	AMJ95831.1	CP014322.1	Alteromonas addita	catalase-peroxidase Group 3	MSNAKLGDVNDSDRKCPVMHGGLTATGSTNMDWWPEALNLDILHQHDTKTNPMGDDFDYREAVKTLDFDELKKDMIALMTDSQSWWPADWGHYGGLMIRMSWHAAGSYRIADGRGGASTGNQRFAPLNSWPDNVNLDKARRLLWPIKKKYGNKLSWADLLVFAGTVAYESMGLKTYGFAFGRADIWHPEKDTYWGAEKEWLAPSDERYNDVETPETMENPLAAVQMGLIYVNPEGVNGKPDPLKTALHVRETFARMAMNDEETVALTAGGHTVGKCHGNGSAERLGPDPEGADIVEQGLGWMNHETRSIGRDTVSSGIEGAWTTNPTQWDNGYFELLLNYDWELKKSPAGAEQWEPIDIKEEDKPVDVEDPSKRYNPIMTDADMAMKMDPIYREISEKF…
AVL56_17125_AMJ95863.1	AMJ95863.1	CP014322.1	Alteromonas addita	typical catalase Group 4	MKRSFTRSIISCVTVGMLSMSLSAQADTLTRQNGAPVGDNQNSQTAGPWGPVLLQDSHLIEKLAAFDRERIPERVVHARGVGIHGYYENYEDLSDDTVAAPFQGEGKKTEVFVRFSSVVHGHLSPETLRDPRGFAVKFYTEQGNWDLVGNNFPVFFIRDAIKFPDMVHAFKPSPVTNKQDAKRVFDFFSHVPESTHTLTMLFSDYGTPASYLNMDGSGVHAFKFVDDEGNVKYVKFTWKANQPIKNFTAEEAMKQQGMDFQPHTTDVYTRIGEKGETASWDLYLQELEPEQLDDFDFNPLDTTKIWPEKLVSSRKIGRMVLNRVPDNFFEETEQAAFAPSNLIPGIEPSEDRMLQGRLFSYADTQRYRLGVNAYRIPVNAPRNVEINNHEQHGQLRTTS…
AW14_13080_AJR04449.1	AJR04449.1	CP007202.1	Siansivirga zeaxanthinifaciens CC-SAMT-1	catalase-peroxidase Group 4	MENQNQSNNYPTHSGDITKCPFHNGTLKKGVNGGIKNTDWWPNMLNLSVLRQNSNLSNPMDPDFNYAEAFNSLNLDEVKKDINELMTNSQDWWPADYGHYGPFFIRMAWHSAGTYRMQDGRGGAGAGMQRFAPLNSWPDNANLDKARLLLWPIKQKYGKKLSWADLMILAGHCAHESMGLKMFGFAGGREDVWEPEEDVYWGSESEWMGNESRYAEDELENPLAAAHMGLIYVNPEGHNANPDPVESAHYIRETFSRMAMNDYETVALIAGGHTFGKTHGAADPSKYVEAEPAAAGIEMQGMGWKNNFGTGKGADTITSGIEGAWTDTPTKWSHKYFENLFGYEWELTKSPAGAHQWKPKNNAGEGTVPDAHDPHKKHAPFMLTTDLSLRFDPEYEKIS…
AWC35_19860_ATA21411.1	ATA21411.1	CP014136.1	Gibbsiella quercinecans	typical catalase Group 7	MSKKGLTTVAGAPVVDNNNVITAGKRGPMLLQDVWFLEKLAHFDREVIPERRMHAKGSGAHGTFTVTHDITRYTRAKIFAEIGKQTEMFVRFSTVAGERGAADAERDIRGFAMKYYTEEGNWDLVGNDTPVFYLRDPLKFPDLNHVVKRDPRTNLRNPVYKWDFFSHLPEALHQLTIDFSDRGLPKSYRHMHGFGSHTYSFINANNERFWVKFHFRCQQGIENLMDDEAEAIVAKDRESSQRDLFDAIERGDHPRWKLQIQIMPEHEASQTPYNPFDLTKVWPHADYPLIDVGFFELNRNPDNYFSEVEQVAMNPANVVPGISFSPDKMLQGRLFSYGDAHRYRLGVNHHQIPVNAAKCPFHNYHRDGAMRVDGNSGNGATYEPNSFGVFQEQPDFSEP…
AWC35_23765_ATA22105.1	ATA22105.1	CP014136.1	Gibbsiella quercinecans	catalase-peroxidase Group 4	MSNPTDTQTDSSVAKCPFHQSASQQSAGSGTTNRDWWPNQLRVDLLNQHSNRSNPLGENFNYRDEFSKLDYFALKGDIKTLLTDSQDWWPADWGSYIGLFIRMAWHSAGTYRTVDGRGGSGRGQQRFAPLNSWPDNVSLDKARRLLWPIKQKYGQKISWADLFILAGNVALENSGFRTFGFAAGREDVWEPDLDVDWGGEKAWLAHRHPESLANRPMGATEMGLIYVNPEGPNASGDPASAAPAIRATFGNMGMNDEEIVALIAGGHTLGKTHGAATDEHVGPEPEAAPLEAQGLGWANSYGSGAGADAITSGLEVVWSQTPTQWSNYFFENLFKYQWVQTRSPAGAIQYEAADAPEIIPDPFNPAKKRKPTMLVTDLTLLFDPEFERISRRFLNDPQS…
AWC36_12465_ATA24860.1	ATA24860.1	CP014137.1	Brenneria goodwinii	typical catalase Group 7	MSKKKLTTVAGSPVVDNNNVVTAGPRGPMLLQDVWFLEKLAHFDREVIPERRMHAKGSGAHGTFTVTHDITRYTRAKIFSEIGKKTDMFVRFSTVAGERGAADAERDIRGFAMKFYTEEGNWDLVGNNTPVFYLRDPLKFPDLNHIVKRDPRTNLRNPVYKWDFFSQLPEALHQLTIDFSDRGLPKSFRNIHGFGSHTYSFINNANERFWVKFHFRCQQGIENLMDDEAEALVGKDRESSQRDLFNAIESGDFPRWNLQIQIMPEAEASQVPYNPFDLTKVWPHGDYPLIDVGFFELNRNPDNYFSEVEQVAFNPAHTVPGISFSPDKMLQGRLFSYGDAERYRLGVNHHQIPVNAPKCPFHNYHRDGAMRIDGNSGNGATYEPNSFGVFQEQPDFSEP…
AWC36_18050_ATA25861.1	ATA25861.1	CP014137.1	Brenneria goodwinii	catalase-peroxidase Group 4	MSTEAKCPFDHGAAAKLTAGGGTTNRDWWPSQLRVDLLSQHSSRSNPLDPTFNYREAFKKLDYQALKNDLRKLMTDSQEWWPADFGHYGPQFIRMAWHSAGTYRAADGRGGGGRGQQRFAPLNAWPDNVNIDKSRRLLWPIKQKYGQAISWADLFILTGNVALETMGFRTFGFGGGREDTWEPDQDVNWGSESAWLAHRPADKLDDSLGATEMGLIYVNPEGPNSSGDPVAAAHAIRVTFGRMGMNDEETVALIGGGHTFGKTHGAAPESHKGADPEAAGLEAQGLGWASDYGTGHGGDAIGSGLEVIWTQTPAQWSNYFFENLFKFEWVQTRSPAGLIQWEAKDAEEIIPDPHDPFRKRKPTMLTTDLSLRIDPIYEKISRRFLENPQAFAEAFARAW…
AWM74_02880_AMB98416.1	AMB98416.1	CP014162.1	Aerococcus urinaeequi	typical catalase Group 7	MSKNGLVKNSVSRNQVVPGNPAMHTDEGAPVINNDDTMTAGRRGPSVLQDTWLQEKLANFSREVIPERRMHAKGSGAFGTFTVTNDVTKYTKAKVFSEVGKQTEMFARFSEVAAERGGADAERDIRGFALKFYTEEGNWDMVGNNTPVFFLRDPKHFIDLNRAIKRDPKTNMRSSNTNWDFWTSLPESLHQVTITMSDRGIPSSYRFMHGFSSHTYSLINANNERVWVKFFFRSQQGIQNLTDQEAAQVIAEDRESHQRDLFDAIEFGQYPKWTLYFQIMTEEEAKQVDFNPFDLTKVWPKEDFPFVEVGEMELNKNPENYFQDVEEASFNPAALVPGIGVSPDRMLQARLFSYPDAQRYRIGVNYHQIPVNYPRGVKDFHPYSRDGQGRMDGNGGGQI…
AWM76_07600_AMC01425.1	AMC01425.1	CP014164.1	Aerococcus viridans	Mn-catalase Group 08	MYIRKSKLQYHAKPEKSNPILARRLQEILGGQWGETTGMLAYTLQGWNTVGNEKYKDLLLDTGTEEIGHMEMLATMINDLLRDAPTDTIEEFARTSDPATAAILGGMDPQHAFVNGLGAGLSDSNGNPWSANFITSSGNLLADMRFNVVRESQARLQVSRNFLQTEDKGVRDMLSYLMARETQHQLQFLKACEELEEKYGPVVPHGTQDLQKQGKEFTHTLYNFSEGEASQALEGETARDGNKFHYSSDPIMAGGEPDLTAAPEILRNTPPEDPNTTVEEGRRMLEGE
AWN65_03965_AMA48675.1	AMA48675.1	CP013992.1	Flavobacterium columnare	typical catalase Group 4	MRKSFLTCASLIISMSAFAQKTLTTSAGAPVNGDLQSLTLGPNGPVLLEDVHLIEKLQHFSRERIPERVMHPRGTGAQGYFILTKNISDLTKAKIFTEVNKKTPVLVRFSSVIHSKGSPETARDPRGFAIKFYTEEGNWDLVGNHIPTFFIRDAIKFPDFTHANKPSPITDLQDENRIFDYFSKTPEATQTLTWLMSDNGTPKSYREMDGFGVNTFKFINDKGDISWVKFHFKSLQGIKNLTAEEVIQVQGKDFSHMTRDLYDNIAAGNFPKWDLYVQIIPNKDINKYDFNIFDDTKQWFNVEEIKVGTLVLDRIPANFFQYTESAAFAPSRVIPGIGFSPDKMLQGRNFSYADAQMYRLGKNHQLLPANRPLVKVNNYHIDGAMNFEERTGDTNYFPS…
AWN65_03970_AMA48676.1	AMA48676.1	CP013992.1	Flavobacterium columnare	typical catalase Group 7	MSYNKENKMTSVSGRPIADNQNSLTAGKRGPMLLQDIWFLEKLAHFDREVIPERRMHAKGSAAFGTFTVTHDITQYTKAKIFSEIGKQTDLFLRFSTVAGERGAADAERDIRGFAVKFYTEEGNWDLVGNNTPVFFIRDPYKFPDLNKAVKRDPGTNLRSANNNWDYWTLLPESLHQITMTMSERGIPKSYRHMNGYGSHTFSFINAHNERFWVKFHFKTAQGIECLTDQESEIIIGKDRESHQRDLYNSIKEGNYPKWHLKVQIMPEEDAKTYPFNPFDLTKVWPHSDYPLIDVGVLELNKNPENYFADVEQSAFNPANIVPGIGFSPDRMLQGRLFSYGDTQRYRLGVNHYQIPVNAPRCPFHNHHKDGAMRIDGNGGGTVHYEPNSYGKWQEQKEY…
AWN65_04380_AMA48752.1	AMA48752.1	CP013992.1	Flavobacterium columnare	catalase-peroxidase Group 3	MNKSKEGKCPFHQGANTEIKKSVVDKWPNALNLDILHQHDTKTNPLGENFNYAEEFKKLDLEALKNDLKKLMTESQDWWPADWGHYGGLMIRMAWHAAGTYRLADGRGGANTGNQRFAPLNSWPDNGNLDKARRLLWPIKKKYGNKISWADLIILAGNMAYESMGFKTFGFAGGREDIWHPEKDIYWGAEKEWLAKERYFDDADSDSLENPLAAVQMGLIYVNPEGVNGEPDPLKTAQDVRTTFKRMAMDDEETVALTAGGHTVGKAHGNGDASILGPNPESSDVETQGFGWINPEGKGNAENTVTSGLEGAWTTTPDKWNHTYFHLLLNYEWELRKSPADAWQWEPINIKEEDKPFDAHIQGVRRNPIMTDADMAMKLDPEYRKIAEKFYKDPAYFED…
AWN76_003585_ARA92342.1	ARA92342.1	CP020382.1	Rhodothermaceae bacterium RA	typical catalase Group 7	MENKPRRKTLTTLAGAPIADNQNSLTAGPRGPLLMQDVQLLQQMQRFNRERIPERVVHAKGSGAYGTFTVTNDVTRYTRAAFLSEVGKETEVFVRFSTVAGERGAADAERDVRGFAVKFYTEEGNWDLVGNNTPVFFVRDPHKFQMFIHTQKRHPRTNLRDMNMQWDFWSLCPESLHQVTILFSDRGIPRTLRHMNGYGSHTYSLINDRGERVWCKFHFKTQQGHAFYTDAEAAEVIGQDRESHQRDLFYAIEEGNYPRWTFCIQVMTDEQARDFRWNPFDLTKVWPHAEFPLIEVGVLELNRNPENYFAEVEQAAFEPSSLVPGIGPSPDKMLQARLMSYADTHLYRIGPNYHQLPVNQPRACEAHTYIHRDGPMFMPRDSGHPNYFPNSYDDAPKEA…
AWN76_014060_ARA94166.1	ARA94166.1	CP020382.1	Rhodothermaceae bacterium RA	catalase-peroxidase Group 3	MQANGSPSNDTATGRCPVVHTAAGQKHHRGTQNADWWPNALNLAILHQHSPRANPLGETFDYARAFQSLDLDAVRRDLFALMTDSQDWWPADYGHYGPLFIRLAWHSAGTYRVGDGRGGASSGTIRFAPLNSWPDNGNLDKARRLLWPIKKKYGRKLSWADLIILAGNCALESMGFKTLGFAGGREDLYEPEIDIYWGSETTFHGDPNYEYDKRWTENRELEHPVGAAEMGLIYVNPQGPDGKPDPVAAAHDIRETFARMAMNDEETVALIAGGHTFGKMHGNGDPGLVGPEPEAAPITEMGLGWKNRNGSGIGVDTFTSGLEGAWTPTPTRWDTSYFDTLFGYEWELTKSPAGAWQWIPANGAAAEAVPDAHDPSVRHAPVMATTDLALIKDPAYLEI…
AWOD_II_0020_CED56679.1	CED56679.1	LN554847.1	Aliivibrio wodanis	typical catalase Group 7	MTKKLTTAAGCPVAHNQNVQTAGKRGPQLLQDVWFLEKLAHFDREVIPERRMHAKGSGAYGTFTVTHDITKYTKAKLFSEIGKQTEMFARFTTVAGERGAADAERDIRGFALKFYTEEGNWDLVGNNTPVFFLRDPLKFPDLNHAVKRDPRTNMRSAKNNWDFWTSLPEALHQVTIVMSDRGIPATYRHMHGFGSHTFSFINSDNERYWVKFHFVSQQGIKNLSDAEAGAVIGNDRESHQRDLLESIDNQDFPKWTLKVQIMPEAEAATVSYNPFDLTKVWPHKDYPLIEVGEFELNRNPQNFFAEVEQSAFNPANVVPGISFSPDKMLQGRLFAYGDAQRYRLGVNHQHIPVNAPRCPVHSYHRDGGMRVDGNFGSTLGYEPNNEGQWAEQPDFSEPP…
AWQ21_12420_ANV85671.1	ANV85671.1	CP016474.1	Synechococcus sp. PCC 7003	catalase-peroxidase Group 3	MTNTGGKCPVMHGAMTTTSMANMDWWPKALNLDILHQHDRKTNPMGADFNYRDAVKTLDVAALKQDLHALMTDSQDWWPADWGHYGGLMIRMTWHAAGTYRIADGRGGAGTGNQRFAPINSWPDNTNLDKARRLLWPIKKKYGNKLSWADLIAYAGTIAYESMGLNTFGFAFGREDIWHPEKDIYWGSEKEWLAPSESPHSRYSGERDLENPLAAVMMGLIYVNPEGVDGNPDPLKTAHDIRITFARMAMNDEETVALTAGGHTVGKCHGNGDATLLGPEPEAADLDDQGLGWLNKTQRGIGRNTVTSGIEGAWTTYPTQWDNGYFRLLLNYDWELKKSPAGAWQWEPINIKEEDKPVDVEDPSIRLSPIMTDADMAMKMDPDYRQISERFYQDPAYFA…
AWQ24_12360_ANV91965.1	ANV91965.1	CP016483.1	Synechococcus sp. PCC 8807	catalase-peroxidase Group 3	MTNTGGKCPVMHGALTTSSMATNMEWWPKALNLDILHQHDHKTNPMGADFNYQDAVKTLDVDALKRDLHALMTDSQDWWPADWGHYGGLMIRMTWHAAGTYRIADGRGGAGTGNQRFAPINSWPDNTNLDKARRLLWPIKKKYGNKLSWADLIAYAGTIAYESMGLKTFGFAFGREDIWHPEKDIYWGSEKEWLAPSDNPHSRYSGERDLENPLAAVMMGLIYVNPEGVDGNPDPLKTAHDIRITFSRMAMNDEETVALTAGGHTVGKCHGNGDATLLGPEPEAADLDDQGLGWLNKTQRGIGRNTVTSGIEGAWTTYPTQWDNGYFRLLLNYDWELKKSPAGAWQWEPINIKEEDKPVDVEDPSIRLSPIMTDADMAMKMDPDYRQISERFYQDPAYF…
AWR26_11045_ANI82665.1	ANI82665.1	CP014007.1	Kosakonia oryzae	catalase-peroxidase Group 4	MSTSDEQSLSSAVEKCPFHDKASKQSTAGATSNRDWWPNQLRVDLLNQHSNRSNPLGESFNYREEFKKLDYSALKADIRSVLTDSQSWWPADWGSYIGLFIRMAWHSAGTYRTVDGRGGSGRGQQRFAPLNSWPDNVSLDKARRLLWPVKQKYGQKISWADLIILAGNVALENAGFRTFGFGAGREDVWEPDFDVDWGNEKEWLSHRHPESLAQAAIGATEMGLIYVNPEGPNASGEPVSAASAIRATFGNMGMNDEETVALIAGGHTLGKTHGAAKPDDYVGPEPEAAPLEAQGFGWMSSYGSGAGADAITSGLEVAWTQTPTQWSNYFFENLFKYEWVQTRSPAGAIQFEAVDAPEIIPDPFDPAKKRKPTMLVTDLTLRFDPEFEKISRRFLNDPQ…
AWR26_11215_ANI82697.1	ANI82697.1	CP014007.1	Kosakonia oryzae	Mn-catalase Group 03	MFRHVKQLQYTVRVSEPNPGLANLLLEQFGGPQGELAAACRYFTQGLGDDDVGRKEMLMDIATEELSHLEIIGTLVGMLNKGAKGELAEGTEKEAELYRSLTANGNDSHITSLLYGGGPALTNSGGVPWTAAYIDTIGEVTADMRSNIAAEARAKIIYERLINVTDDPGVKDALSFLMTREAAHQLSFEKALYSIRNNFPPGKLPPIEQYSNVYYNMSEGDDPRGSWNSDENFDYVADPQPAVDGGDGLATVQLNDKQRALLKAMAERTQSDPGVDPLTGAELGSGEPQEK
AWR26_14835_ANI83368.1	ANI83368.1	CP014007.1	Kosakonia oryzae	typical catalase Group 5	MSHQKNDPQHAPVHDADESRPGLDSLAPEDNSHRPSPKPTAPGEQPTAPGSLKAPDTSNDKLNALEPFRKGSENFPLTTNQGVRIADDQNSLRAGTRGPTLLEDFILREKITHFDHERIPERIVHARGSAAHGYFQPYRSLSDITKADFLSDPEKITPVFVRFSTVQGGAGSADTVRDIRGFATKFYTEEGIFDLVGNNTPIFFIQDAHKFPDFVHAVKPEPHWAIPQGQSAHDTFWDYVSLQPETLHNVMWAMSDRGIPRSYRTMEGFGIHTFRLINAEGKATFVRFHWKPLAGKASLVWDEAQKLTGRDPDFHRRELWEAIEAGDYPEYELGLQLIPEEDEFKFDFDLLDPTKLIPEELVPVQRVGKMVLNRNPDNFFSENEQAAFHPGHIVPGLDF…
AWR27_07470_AQG82375.1	AQG82375.1	CP014263.1	Spirosoma montaniterrae	catalase-peroxidase Group 4	MSGKLDNVAGSGTRNRDWWPNQLKLNILRQHSELSNPMGSSFNYADEFKSLDLDAVKQDLHALMTDSQEWWPADFGHYGGLFIRMAWHSAGTYRVGDGRGGAGAGMLRFAPLNSWPDNVSLDKSRRLLWPIKQKYGQKISWADLMILAGNVALESMGFKTFGFAGGREDRWEPQEDVYWGSETTWLGNDARYGRGSEGVAAHGVVSSDEDPGRPIHSRPLEDPLGAAHMGLIYVNPEGPDGNPDPLAAAHDIRETFGRMAMNDEETVALIAGGHSFGKTHGAAPSDHVGKEPEAALIEEQGFGWTNSYGTGKGADTITSGLEVIWTTTPTQWSNNYFENLFGFEWELTKSPGGAHQWVAKDADDIIPDAYDPNKRHKPTMLTTDLSLRVDPAYEKISRR…
AWR27_16740_AQG80819.1	AQG80819.1	CP014263.1	Spirosoma montaniterrae	Mn-catalase Group 07	MILKMDRLPIELPKPNNPSPNNAAAVQELLGGKFGEMSTLMNYTYQSFNFRGRKKLRPFYDLICSIAGEEYGHIEVVSYTINLLLTGVSKRGIDPTIAPLANGTDARNTSHFIASGQTALPMDSMGRFWSGENVFSSGNLKLDLLHNFFLECGARANKMRVYEMVDDPTARTMVGYLLVRGGVHVVAYAKALETLTGVDVKKLLPIPDLSNDPFPEARKFMDQQMHLKLYSFSQDDYTQAGIIWNGEHPEDGQPLEFIQGAIPGYPAPDLDEEPQLNAPGADEYDPQMFADIAKKLGITL
AWY79_00975_AMK09776.1	AMK09776.1	CP014206.1	Pseudodesulfovibrio indicus	typical catalase Group 6	MTKDKKLTSAFGSPVGNDLNTLTAGGRGPTLMQDVHLLEKLAHFDRERIPERVVHAKGAGAYGYFEVTADVTKYTKAAFLSKVGKKTDVFARFSTVGGEKGSADAERDPRGFALKFYTEEGNYDMTGNNTPVFFIRDPLKFPDFIHTQKRDPATNLKSPTMAWDFWSLTPESMHQVTILFSDRGTPATYRNMNGYSSHTYKWYNDKGEYYWVQYHFKTDQGIKNLTGPEAAEMCGKDPDHATRDLYDAIEAGDYPSWTLEMQILSPEQAKDFGWDIFDITKVWPHKEVPPITVGKLVLDRNPENYFAEVEQAAFNPSNLVPGIGVSPDKMLQGRLFSYHDTHLHRLGPNYHLIPVNQPKLAPENNYQRDGNMRVDNNGGGGPNYWPNSFHGPVPDGVSN…
AX01_10695_AMZ52750.1	AMZ52750.1	CP014971.2	Salmonella enterica subsp. enterica serovar Typhimurium str. USDA-ARS-USMARC-1898	Mn-catalase Group 03	MFRHVKQLQYTVRVSEPNPGLANLLLEQFGGPQGELAAACRYFTQGLSDDDAGRREMLMDIATEELSHLEIIGSLVGMLNKGAKGELAEGTENEAELYRSLTQNGNDSHITSLLYGGGPALTNSGGVPWTAAYIDTIGEVTADLRSNIAAEARAKIIYERLINLTDDPGVKDTLSFLMTREVAHQLSFEKALYSIRNNFPPGKLPPVEQYTDVYYNMSQGDDPRGSWNSDENFNYVAEPMPAVDGGDGLATVKLPREQMALLKAMAERTKSDPTVDPLTGAELGCGEPKEDK
AX01_12800_AMZ53144.1	AMZ53144.1	CP014971.2	Salmonella enterica subsp. enterica serovar Typhimurium str. USDA-ARS-USMARC-1898	typical catalase Group 5	MSHNEKSPHQSPVHDTRESQPGLDSLAPSDGSHRPTPETTPPGAQPTAPGSLKAPETANDKLTALDAFRKGSENYALTTNQGVRIADDQNSLRAGSRGPTLLEDFILREKITHFDHERIPERIVHARGSAAHGYFQPYKDLSDITKAAFLCDPQKITPVFVRFSTVQGGAGSADTVRDIRGFATKFYTEEGIFDLVGNNTPIFFIQDAHKFPDFVHAVKPEPHWAIPQGQSAHDTFWDYVSLQPETLHNVMWAMSDRGIPRSYRTMEGFGIHTFRLINAQGKATFVRFHWKPLAGKASLVWDESQKLTGRDPDFHRRDLWEAIEAGDFPEYELGLQLIAEEDEFKFDFDLLDPTKLIPEELVPVQRVGKMVLNRNPDNFFAENEQAAFHPGHIVPGIDF…
AX01_21855_AMZ54823.1	AMZ54823.1	CP014971.2	Salmonella enterica subsp. enterica serovar Typhimurium str. USDA-ARS-USMARC-1898	catalase-peroxidase Group 4	MSTTDDTHNTLSTGKCPFHQGGHDRSAGAGTASRDWWPNQLRVDLLNQHSNRSNPLGEDFDYRKEFSKLDYSALKGDLKALLTDSQPWWPADWGSYVGLFIRMAWHGAGTYRSIDGRGGAGRGQQRFAPLNSWPDNVSLDKARRLLWPIKQKYGQKISWADLFILAGNVALENSGFRTFGFGAGREDVWEPDLDVNWGDEKAWLTHRHPEALAKAPLGATEMGLIYVNPEGPDHSGEPLSAAAAIRATFGNMGMNDEETVALIAGGHTLGKTHGAAAASHVGADPEAAPIEAQGLGWASSYGSGVGADAITSGLEVVWTQTPTQWSNYFFENLFKYEWVQTRSPAGAIQFEAVDAPDIIPDPFDPSKKRKPTMLVTDLTLRFDPEFEKISRRFLNDPQA…
AX767_06115_AMM23971.1	AMM23971.1	CP014517.1	Variovorax sp. PAMC 28711	catalase-peroxidase Group 4	MAEEKSEAKCPFSQATGAGRTNRDWWPQQLRVDLLHQHSSKSDPMGQNFDYATAFKSLDLAAVKKDLAALMTDSQDWWPADFGHYGPLFIRMAWHSAGTYRIGDGRGGAGRGQQRFAPLNSWPDNVSLDKARRLLWPIKQKYGQKISWADLMILTGNVALETMGFKTFGFAGGRADVWEPDQDVYWGREDKWLGGDVRYSQGSPGVEEAHGVLVKDDDSQVPHTRDLENPLAAVQMGLIYVNPEGPDGNPDPLASARDIRDTFARMAMDDEETVALIAGGHTFGKTHGAGPADNVAHEPEAAGLEAQGFGWHNKFGSGKGGDTITSGLEVTWTTKPTQWTNDYFDHLFGFEWELTKSPAGAHQWTAKGAEATIPHAHDASKKLVPTMLTSDVALRMDPA…
AX767_12440_AMM25081.1	AMM25081.1	CP014517.1	Variovorax sp. PAMC 28711	typical catalase Group 5	MTPQNKAAAGRRPKASDGANAKQAQLAESTVDNASALTTNQGLQIPDNHNSLKAGVRGPTLLEDFILREKITHFDHERIPERAVHARGSAAHGYFQVYKSMSQFTCAEFLQDPAVKTPVFVRFSTVAGSRGSADTVRDVRGFAVKFYTQQGNYDLVGNNIPVFFIQDAIKFPDLIHAVKPEPHHEMPQAASAHDTFWDFASLMPESTHMLMWAMSDRALPRSLRMMEGFGVHTFRFINSRGESHFVKFHWKPKLGIHGLAWDEAQKIAGKDADFHRRDLWEAIDNGDFPEWELGVQMIPQDKEHALGFDLLDPTKLIPEELVPVVKIGRMVLNRNPDNFFAETEQVAFHPGHVVPGIDFSNDPLLQGRLFSYTDTQISRLGGANFHELPINKAVCPFHN…
AXE80_09995_ANW96590.1	ANW96590.1	CP014224.1	Wenyingzhuangia fucanilytica	typical catalase Group 7	MKRLTSQNGAPISDDHNSISAGSRGSLTFDNWQLMEKLAHFNRERIPERVVHARGYGAYGTFKLTKDLSDYTIAKFLQNTGKETKVFARFSTVAGGQDSSDYVRDVRGFSLKFYTEEGNWDMVGNNTPVFFLRDPSKFPDFIHSQKKDPKTNVPNPSNHFEFWASNPQSLHQVTILMSERGIPFSLRHMNGYASHTLSFWNNNGERFWVKWHFKTNQGIKTLTNEEAALKDAHGMQEDLVSSIENGDFPSWTVKVQIMPEKDAETYDINPFDLTKVWPHSDYPLVEIGQLELNENVTNYFAETEQSAFSPGNLVPGLGASPDKMLQARLFAYGDAHRYRVGANHNQIPVNSPKCPVHHYQQDGAMATGGCPYGHGSSTKNEAVNFYPNDRDDAPKQDES…
AXE84_05590_AMD98943.1	AMD98943.1	CP014232.1	Actinomyces oris	typical catalase Group 7	MNDTNLPETPQDGAPAGCPMSRAGLGEHLPSRNNAAGQGRMTMANGSPVYNNQDSMTAGPRGPVALQDAWLLEKHAHFNREVIPERRMHAKGSGAWGTFTVTRAIPELTRAAIFSAEGNQCELFMRFSTVAGERGAADAERDIRGFAMRFFTSEGNWDVVGNNTPVFFFRDGKKFIDLNHAVKRDPRTNLRSPNTNWDFWTSLPESLLQVTITMSDRGIPLSYRYMHGFSSHAYSFINAEGVRTWVKFHFRSQQGLANLTDQEAATVIAEDRESNQRDLYESIEKGQYPRWTMYVQTMTVEQAEALTDFNPFDLTKMWPKADFPFQEVGVLELNRNPDNYFQDVEQAGFTPQNIVPGIGYSPDRMLQARLFSYGDAQRYRLGVNHHQIPVNAPRGVACP…
AXF13_03075_AMD89176.1	AMD89176.1	CP014229.1	Desulfovibrio fairfieldensis	typical catalase Group 7	MKNKDSLTTNAGAPVPNNNHALTAGPRGPMLMQDVWFQEKLAHFDREVIPERRMHARGSGAYGTFTVTHDLTKYTRASLFAEIGKKTDVFARFSTVAGERGAADAERDIRGFALKFYTDQGNWDMVGNNTPVFFLRDPLNFPDLNHVVKRNPRTNMHSAKDNWDFWTLLPEALHQVTVVMSDRGIPASYRHMHGFGSHTYSLINAKNERFWVKFHFRTQQGIKNLTDAEAQELIGRDRDSHQRDLYEHIEKGDYPRWTLYFQIMPEEDAEKLPYHPFDLTKVWYHKDYPLMEVGVLELNRNPENYFAEVEQAAFNPSNLVPGIGVSPDKMLQGRLFSYGDAQRYRLGVNHHLIPVNKSRCPYHSFHRDGQMRVDGNYGSYTSYEPNSEGAWQEQPEFAE…
AXF14_03660_AMD86858.1	AMD86858.1	CP014228.1	Actinomyces radicidentis	typical catalase Group 7	MSDEDMKSSMDPMDRTGLGEHLPSRNDVAGEGRMTMANGSPVVNNQDSMTAGPRGPVALQDAWLIEKHARFNREVIPERRMHAKGSGAWGTFTVTHDVADLSRAAILSKAGNSCELFMRFSTVAGERGAADAERDIRGFAMRFYTEEGNWDVVGNNTPVFFFRDPKKFIDLNHAVKRDPRTNLRSPNTNWDFWTSLPESLLQVTITMSDRGIPLSFRYMHGFSSHAYSFINAEGVRTWVKFHFRSQQGIANLTDQEAATVVGQDRESNQRDLYESIEKGAYPRWTMYVQTMTTEQADALDWNPFDLTKMWPKADYPLREVGVLELNRNADNYFQDVEQVGFTPQNIVPGIGYSPDKMLQGRLFAYGDAQRYRLGVNNDQIPVNRPRGVENPHSFHRDGQ…
AXG55_07260_APJ03714.1	APJ03714.1	CP017834.1	Silvanigrella aquatica	catalase-peroxidase Group 3	MSTNSKCPFSNGARQNVLLGAPSNADWWPNQLNINILHQHSSLANPMDEKFDYSKEFKSLNLKALIKDLKILMTDSQDWWPADYGHYGPFFIRMAWHSAGTYRIADGRGGAGSGTQRFAPLNSWPDNANLDKARRLLWPIKQKYGRKISWADLMILTGNVALETMGFKTFGFAGGRADVWAPEQDINWGTEKTWLGDERYKGNRELDNPLGAVQMGLIYVNPEGPNGKPDPVASAKDIRETFARMAMNDEETVALVAGGHTFGKTHGAAEPPKYVGREPEGAPIEEQGLGWISSYGTGKGVHTITSGLEGAWTPTPIQWDNSYFETLFKYEWELTKSPAGAHQWKPKDPSAAKLVPDAHDPNKRHAPMMSTADLAMRMDPIYEKISRRFMANPKLLADA…
AXW83_23015_AMJ62782.1	AMJ62782.1	CP014301.1	Bosea sp. PAMC 26642	Mn-catalase Group 06	MFMRVDKLQAELPAPKKKDPNAAAALQELLGGKYGEMSTLGNYMFQSFNFRSKDKLKPFYHLVASITAEELGHVELVSNGVAMLNNGPDNDGDEADGGDISDAPHELMKDIRLAAGFYSNAGGATPVNSNGVSWNNDFITTTGNVVTDLLHNFHLECGARLHKLRVYETLSDPTGREVCGYLLVRGSVHAHAYALALKQITGVEIEKMLPTPNINLDKIPECQKYLQEGSHRRLYTFSPNDYKAMSGIWGGGEMALPGDPKGELEVVDGMPEGGKIHQLTCVPSAFTPDYAPEEMFEIAEKLYKKSR
AXW83_25195_AMJ63942.1	AMJ63942.1	CP014301.1	Bosea sp. PAMC 26642	typical catalase Group 7	MSKNPTMTTTAGAPIPDNQNSITAGERGPVLLQDYQLLEKLAHQNRERIPERAVHAKGWGAHGTLTITGDISKYTKAKVLQPGATTPMIARFSTVAGEMGAADAERDVRGFSLKFYTEEGNWDLVGNNTPVFFVRDPVKFPDFIHTQKRHPKTNMRSPTAMWDFWSLSPESLHQVTILMSDRGLPTDVRHINGYGSHTFSLWNDAGERYWVKFHFKTLQGHRHWTNDEASVVVGKTRESTQEDLFNAIENGDFPRWKMQVQIMPELDAEKTSYNPFDLTKVWPHSEYPVIDIGVFELNRNAENYFAEIENAAYSPSNIVPGIGFSPDKMLQARIFSYADAHRHRLGTHYENIPVNQPKVPVAHYHRDGQMNTYGGIRTGHPDAYYEPNSFGGPVEQPSA…
AXY_01740_BAM46306.1	BAM46306.1	AP012050.1	Amphibacillus xylanus NBRC 15112	Mn-catalase Group 07	MMKRVNRILIELPYPEHGDMNAAAAVQELMGGKFGEMSTLNNYMFQSFNFRAKKKFKPFYDLIASITAEEFGHVELVANTINLLSIGNTVPGDPDTAPLQNGKDARYSLHFTTTPQTAYPGDGMGRPWNGEYVNNSGVLVEDLLANYCLEIGARTHKMRVYEMTTHPTAREMIGYLLVRGGTHIIAYAKAIKVATGVDVGKMLPVPSLDNNKFDHAKKFMDQGLYNVLYTWGEPEYRDINQIWKGLNPETGEPLRVIDGMPEGAPVPDLPELPEQFAPGIDLDDYNRILKRLKSNM
AY601_2180_AMP99080.1	AMP99080.1	CP014504.1	Pedobacter cryoconitis	typical catalase Group 5	MKKPAVSPSKVISKNEDLQTNREDGSGQLLTTNQGLKVNDDQNSLKAGERGATLLEDFILREKITHFDHERIPERIVHARGSGAHGVFELYKSQAEYTKAGFLNDTTIQTPVFVRFSTVAGSRGSTDLARDVRGFSVKFYTQEGIYDFVGNNMPVFFIQDAIKFPDLIHAVKPEPHHEMPQAASAHDTFWDFISLMPESSHMIMWLMSDRAIPRSYRMMEGFGVHTFRLINEEGKSHFVKFHWKPLLGVHSVVWNEALKISGNDPDFHRRDLWEAIEAGAFPEWELGIQVIPEEDEHKFEFDLLDPTKLVPEELVPVQRIGKMTLNRNPDNFFAETEQVAFHPGHLVPGIDFTNDPLLQGRLFSYTDTQLSRLGGPNFHEIPINRPVSPVHNNQRDGHM…
AY601_2962_AMP99836.1	AMP99836.1	CP014504.1	Pedobacter cryoconitis	typical catalase Group 7	MEETNKPTRKLTTASGRPYAEHENSQSVGRRGPLLLQDFVLHEKMAHFNRERIPERVVHAKGTGAYGTLTITHDISKYTKAKIFNQIGNTCKMFLRFSTVGGEKGSADSERDPRGFALKFYTEDGNWDLVGNNTPVFFIKDPKKFSDFIHTQKREPRTNLKSPTMMWDFWSLNPESLHQVMILMSDRGTPFSYRHMDGFGSHTYSMINADNERVWVKFHFKTQQGIKNFTGPEADAMRTQDMDHSQRDLVEAIDNKQFPKWTMKIQVMTEEEAKTFRWNPFDLSKIWPHGEFPLIEVGEIELNQIPRNYFAHVEQAAFAPSNLVDGIGFSPDKMLQGRILSYADAHRHRLGVNYEQIPVNACPFMVNNYHRDGQMRVDDNGNEEPNYYPNSFGDVIPDE…
AY601_3002_AMP99876.1	AMP99876.1	CP014504.1	Pedobacter cryoconitis	catalase-peroxidase Group 4	MESESNDISKCPFHNGSMKHNVGGGGTRNNDWWPNQLKLSILRQHSSLSNPMGEGFNYAEAFNSLDLAAVKKDLHALMTDSQDWWPADFGHYGGLFIRMAWHSAGTYRVGDGRGGAGAGLQRFAPLNSWPDNVSLDKARRLLWPIKQKYGNKISWADLMILTGNIALESMGFKTFGYAGGREDVWEADESVYWGSETTWLGGDLRYAHGSPGVDGHGVLVSEDDADGDIHSRNLEKPLAAVQMGLIYVNPEGPDGNPDPVAAAKDIRDTFGRMAMNDEETVALIAGGHSFGKTHGAASADHVGKEPEAVDTEMQGLGWSNSYGSGKGADTITSGLEVTWTTTPTQWSNNFFENLFGFEWQLSKSPAGAHQWVAKNAEAIIPDAFDSSKKHLPTMLTTDL…
AYJ57_02290_ANT59293.1	ANT59293.1	CP014595.1	Yangia sp. CCB-MM3	typical catalase Group 7	MSKRLTTSAGAPVPSNETSATAGPRGPVLLEDYQLVEKLAHQNRERIPERVVHAKGWGAQGTFTVTHDISKYTSAKLFSKVGNTCDILSRWSTVAGEQGAADAERDVRGFSIKFYTEEGNWDVVGNNTPIFFIRDAFKFPDFIRTQKRHPKTNLRSPEAMFDFWAGQPESVHQVTILMSDRGIPKNPMHMHGYGSHTFSMFNDKGERYWVKFHFRCQQPIANYTNEQAEKIVGETRESYQEDLYNAIEEGKFPKWELNIQVMEEEQAAQLDFNPFDLTKVWSHKDFPLIPVGMLEFNKNPDNYFQMIENAAFSPSNKIPGIGFSPDKMLQGRLFSYADAHRYRLGTHYEALPANAPKSPVHHYHKDGAMRFFPPQTGHIDAYYEPNQYEDSAKADPSVM…
AYJ57_19500_ANT62838.1	ANT62838.1	CP014596.1	Yangia sp. CCB-MM3	catalase-peroxidase Group 3	MDGNDVKPTGGCPVMHGGQTSTANSVTSWWPNALNLDILHQHDSKTQPFAPNFNYREELKKLDVEALKDDLRQLMKDSQEWWPADWGSYVGMFARVAWHAAGSYRLADGRGGGGTGNQRFAPLNSWPDNVNTDKGRRLLWPIKKKYGNKISWADLMILSGTIAYEVAGLKTFGFAFGREDIWHPEKDVYWGAEKEWLAASDNRYDDVADPSTMENPLAAVQMGLIYVNPEGVNGQPDPVKTAAHLRETFARMAMNDEETAALTAGGHTIGKSHGNGNADDLSADPEAADVTAQGMGWMNTKGRGIGRDTVVSGIEGAWTKNPTQWDMGYFEMLFGHEWELTKSPAGAWQYKPVEINDEDMPVDVEDASIKCMPMMTDADMAMKVDPIYNAICQKFMADP…
AYJ57_19585_ANT62588.1	ANT62588.1	CP014596.1	Yangia sp. CCB-MM3	catalase-peroxidase Group 3	MDGNDISTAGKCPVMHGGLTERGQSVTSWWPKSLNLDILSQHDLKTNPMGPDFDYQEELKSLDVEALKDDLRQLMKDSQAWWPADWGSYVGMFARVAWHAAGSYRLADGRGGGGTGNQRFAPLNSWPDNVNTDKGRRLLWPIKKKYGNKVSWADLMILSGTIGYEVAGLKTFGFAFGREDIWHPEKDVYWGAEKEWLAASDNRYDDVSNPATMENPLAAVQMGLIYVNPEGVNGQPDPQKTAEQVRETFKRMAMDDEETAALTAGGHTIGKCHGNGLAENLSADPEAAEPEYQGIGWMNTKGRSIGRDQVVSGIEGAWTSNPTQWDMGWFDMLFGHEWELKKSPAGAWQWMPVDIKEEDMPADVEDPSMKTMPIMTDADMAMKVDPAYNAICQKFMADP…
AYM39_12650_ANE55942.1	ANE55942.1	CP014360.1	Methylomonas sp. DH-1	catalase-peroxidase Group 2	MKTKQLFLASALAVAIGAALPTTAFADMQPTTNSFWWPEQLDLRPLRQNSAESNPLGQAFNYAEQFKTLDLKAVKRDIANALHTSQPWWPADYGNYGPFFIRMAWHSAGVYRIFDGRGGASGGQQRFEPLNSWPDNVNLDKARRLLWPVKQKYGAKLSWADLMVLAGNVALEDMGFKTIGFAGGRADDWEAENVNWGMEKKFLADERHSANGELSKPLGATQMGLIYVNPEGPGGNPDPLAAAKHIREAFGRMAMNDEETVALIAGGHTFGKAHGAHKPDECVGKEPAAAPIEQQGLGWANKCGTGHGADTVSSGLEGAWSTNPTRWTHDYLTWLYSFDWQQTKSPAGATQWIPKDGKGDNFVPDAHDTSKRHPPIMFTTDLALKMDPDYQKISKRFLD…
AYM40_02325_ANB71332.1	ANB71332.1	CP014578.1	Burkholderia sp. OLGA172	typical catalase Group 7	MSERKLTNAAGAPIADNQNSMTAGARGPVVLQDVWLLEKLAHFDREVIPERRVHAKGSGAFGTLKVTHDVSRFTKAKVFAQLGKDTPLFMRFSTVAGERGAADAERDVRGFSIKFYTEEGNWDVVGNNTPVFFIRDPLKFPDFIHTQKRDPYTNMRSNIAAWDFWSRHPESLHQVTILMSDRGIPQNYRQMHGFGSHTYSFINADNERFWVKFHFKSMQGIENFTDAEAAQVVAQNRESAQHDLLTSIEAGNFPKWRFAIQVMPEAEAANYRFNPFDITKVWSQKDYPLIDVGTIELNRNAANYFADVEQAAFTPANVVPGIGFSPDRLLQGRLFSYGDTQRYRLGTNHHQIPVNAPRCPVHHSFHRDGAMRTDGNLGGNVNYEPSRFGDFGQDTSAAE…
AYM40_09665_ANB72603.1	ANB72603.1	CP014578.1	Burkholderia sp. OLGA172	catalase-peroxidase Group 4	MSNEAKCPFNHAAGGGTTNRDWWPKQLRLDLLSQHSNKSNPLDNGFNYAEAFKSLDLAAVKKDLAALMTDSQDWWPADFGHYGPLFIRMAWHSAGTYRIGDGRGGAGRGQQRFAPLNSWPDNVSLDKARRLLWPVKQKYGQKISWADLLILTGNVALETMGFKTFGFGGGREDTWEPDQDVYWGDEKTWLGGDVRYGKGAAGKDEGVIVADEALHGSEVSRDDNGRVLENPLGAVQMGLIYVNPEGPDGKPDPLAAAVDIRETFARMAMNDEETVALIAGGHAFGKTHGAGPADNVGAPPEAAGLEDQGLGWKNSFGAGKGGDTISSGLEVTWSTTPTKWGNGYLENLFKYEWELSKSPAGANQWVAKDAGDTIPHAHDPSKKLRPTMLTTDLSLRFDP…
AYR59_01725_ANZ58850.1	ANZ58850.1	CP014907.1	Lactobacillus lindneri	typical catalase Group 6	MTKKLTTKAGQPWANNEHSQTAGVRGPVLMQDYQLLEKLAHFNRERIPERVVHAKGAGAKGVFKLTHDMSKYTKADLFNGVGKETPMAARFSQVAGEAGYPDTIRDVRGYALKFYTRDGNYDIVGNNTPVFFINDPLKFPDFIHSQKRDPQTHMRDDEMQWDFWSHSPESVHQVTYLMGDRGNPASYRNMNGYGSHTYKWVNKDGEAVWVKYHFISQQGVKNMTDEVAAKAASEDTDYLLHDLYDAIKNHNYPTWKVCVQIIPYQAGLDYHDDIFDVTKVVSHHDYPLQEVGEFTLNESPTNYFDEVEEIAFSPANLVPGIEASPDKLLQGRLFGYKDAQRYRLGANFEQLEVNRPKNEVHTYERDGAMADHQGNGVNYEPNSKGGPVEDPNAAVKPAQ…
AYR59_02300_ANZ58944.1	ANZ58944.1	CP014907.1	Lactobacillus lindneri	Mn-catalase Group 08	MFKHTRKLQYNAKPDRPDPIMARRLQEALGGQWGETTGMLSYLSQGWASTGDEKYKDLLLDTGTEELAHIEMISTMIGYPLEDAPFYKNEETLKKDPSLAATMAGMDPEHALVHGLNASLNNPNGVAWNAGYTTSSGNLVADMRFNVVRESEARLQVSRLYSMTEDEGVRDMLKFLLARETQHQLQFMKAQEELEEKYGVVVPGDMKDIEHSEFSHVLMNFSDGDGSRAFEGQVAKDGEKFTYQENPEAMGGIPEVKPADPQLHNDQG
AZC_3290_BAF89288.1	BAF89288.1	AP009384.1	Azorhizobium caulinodans ORS 571	catalase-peroxidase Group 4	MSPRARRCTDRCARMSERSMNATTETPTGKCPVAHGTGGTQNRDWWPNQLRVDLLNLHSPKSDPLGAAFDYRAEFKKLDYEALKNDLRKLMTDSQDWWPADFGNYGPQFVRMAWHSAGTYRLADGRGGGGRGQQRFAPLNSWPDNVNIDKSRRLLWPIKQKYGQKISWADLMILTGNVALETMGFRTFGFAGGREDTWEPDQDVFWGSETAWLSHRTLEKFDAPLGATEMGLIYVNPEGPDRNGDPISAAKFIRETFARMAMNDEETVALIGGGHTFGKTHGAAAESHKGPDPEAAALEAQGLGWASNYGTGHGADTIGSGLEVTWTQTPAQWSNFFFENLFKYEWVQTRSPAGAIQWEAKDGPDIIPDAHNPEKKHKPTMLTTDLSLRFDPIYEKISR…
AZE41_05625_AMQ05435.1	AMQ05435.1	CP014616.1	Sporosarcina psychrophila	typical catalase Group 5	MEETTLDNKHNDEKNRQLETYRSHDAGKKMTTNQGLNVSEDEHSLKAGLRGPTLMEDFHFREKMTHFDHERIPERVVHARGYAAHGEFELFESMKDYTKAAFLQEPGSKTPVFTRISTVAGSKGSAETVRDVRGFAVKFYTEEGNYDLVGNNMPVFFIQDAIKFPDLIHAVKPEPHKEMPQAASAHDTFWDFVVSNQESAHMIMWHMSDRAIPRSFRMMEGFGVHTYRLVNAEGKAHFVKFHWKPKLGVHSLVWDEAQKIAGKDPDFHRRDLWESIEKGDFVEFEFGVQLIEEKDEFMFDFDILDPTKLWPEEKVPVKIIGKMTLNRNVDNVFAETEQVAFHPGSVVPGIDFSNDPLLQGRLFSYTDTQLIRLGGPNFHELPINRPVCPIHNNQRDGYG…
AZE41_06280_AMQ05554.1	AMQ05554.1	CP014616.1	Sporosarcina psychrophila	typical catalase Group 5	MDKLSPNHKQVIDENSKDKQLEQFRVNNEGTKMTTNQALKVSNDEESLKAGIRGPTLMEDFHFREKLTHFDNERIPERVVHARGYAAHGFFELYESMKEFTKAGFLQEPGTKTPVFTRFSNVVGSKGSADTVRDVRGFAVKFYTEEGNYDLVGNNIPIFFIQDGIKFPDLVHAIQPEPHNEMPQAASAHDTFWDFVANNQESAHMVMWLMSDRAIPRSWRMMEGFGVHTFRFVNEQGKGRFVKFHWKPALGVHSLVWDEAQKISGKDPDFQRRDLWESIEHGNFAEYELGVQMIDEKDEFMFDFDVLDATKLWPEEIVPVKIFGKMTLNRNVDNVFAETEQVAFHPGNVVPGIDFTNDPLLQGRLFSYLDTQLIRLGGPNFTEIPINRAVCPFHNNQRN…
AZE41_07105_AMQ05699.1	AMQ05699.1	CP014616.1	Sporosarcina psychrophila	typical catalase Group 3	MSDDLFNNKLNEEQEDTLTNRQGHPVTNNQNLRTVGNRGPAVLENYDFLEKISHFDRERIPERVVHARGAGAHGYFEAYGTAGDEPVSKYTRAKLFQVKGKQTPVFVRFSSVIHGGHSPETLRDPRGFAVKFYTEDGNWDLVGNNLKIFFIRDAIKFPDMIHAFKPDPITNIQDGERFFDFCASSPESFHMVTFVYSPWGIPANYRMMQGSGVNTYKWVNQEGVAVLVKYHWEPKQGIKNLTQQQASEIQGTSFNHATQDLHDAIKEGDYPEWELLVQIMSDDEHPELDFDPLDDTKLWPEDLFPWLPVGKMTLNKNPEDYFTEVEQVAFGTGVLVDGLDFSDDKMLQGRTFSYSDTQRHRVGANYLQLPINSPKKRVATNQSGGQMQYKLDRAPGQNP…
AZE41_10515_AMQ06320.1	AMQ06320.1	CP014616.1	Sporosarcina psychrophila	typical catalase Group 7	MTEKDNNKKLTTAAGAPVVDNQNSMTAGPRGPILLQDVWLLEKLAHFDREVIPERRMHAKGSAAYGSFTVTHDISQYTKAKIFSEIGKKTDMFVRFSTVAGERGGADAERDIRGFSMRYYTEEGNWDLVGNNTPVFFFRDPMQFPDLNHAVKRDPRTNMRSANNNWDFWTSLPEALHQVTIVMSDRGLPNSYRNMHGFGSHTFSMINADNKRVWVKFHMRSQQGIENLTDQEAEAVVGKDRESHQRDLYDNIENGNFPKWKMYIQVMTEEQANNMPYNPFDLTKVWYKKDFPLIEVGEWELNRNPDNYFAEVEQAAFTPANVVPGISFSPDKMLQGRLFSYGDAQRYRLGVNHHQIPVNQPKCPVHSFHRDGAMRVDGNMGSTLHYEPNSYGEWKEQPK…
AZE41_11795_AMQ06553.1	AMQ06553.1	CP014616.1	Sporosarcina psychrophila	Mn-catalase Group 04	MYYYKEELINPVTPPDKPDPEAAKVMQEILGGHFGEMRTMMQYFFQSSNFRGKETQYRDLLRGVFLEEIAHVELVQNTINQLLNDSGESAVPGNAGVDQAPLDDAVRHANPHHYIIGAQASLPVDATGNPWNGSWVYSHGNLISDMLDNLVLESTGVLQKTRIYEMSSNKTFRETLAFLIVRDNAHQNAFAKALETLGVDWGKLFPVPNYDINKYPECRKYVELGYHNAQFNFRLDPTRIGEIYQGQSPSRNKGELKVTPPPAGFPVPLLPDMPNEHSPGIQDMNN
AZE41_21375_AMQ08281.1	AMQ08281.1	CP014616.1	Sporosarcina psychrophila	typical catalase Group 1	MRENNGGESGSSTHLNRNVSKFWAEEMHSQTVGERGPVLEQDSILHETLETFVHSTILERPVHVKGFGAFGYFETVYSMAKYTKLCFLQNPGQQVPVTVRFSLAVSNKGTPDTSRNVRGFSTKFYTEEGIFDLVFNHIPVFLVRDAIRFPETIQAFLPSPVNNLMDPERFWSFIARAPESTHFVVRLYSDAGTVKSFRHMPGYGVNTYVWKNGEGVRSYVKYHWVPYAGEQYIDAQEAARWNGENPDIAGQDLYDTLAKGEPVVYGLYVQLMNPKDEATLPYDPLDDTKVWDKQQYPLMPVGRLTLNRNPDNYMEQVEKLAYSPSNLLEGAELSDDKMLQGRANIYSDSQRRRLGPDFRKIPINHQEDWTPATQVTSGNGRFVEGHLERSDLPKPDDFT…
AZE99_04455_AMO71207.1	AMO71207.1	CP014545.1	Sphingorhabdus sp. M41	catalase-peroxidase Group 2	MFKSQVSLFALLAASMTPLVMASPAQAQKTVVQDPPGAMSNKDWWPQSLDLAALRQHEAQSNPYGADYDYAAEFATLDLAAVKEDIRKVLTTSQDWWPADYGHYGPFFIRMAWHSAGTYRVGDGRGGSDGGEQRFEPLNSWPDNVSLDKARRLVWPIKQKYGRKLSWGDLMVLAGNVSLEDMGFKTIGFAGGRVDAFQPDLVFWGPEAKMLADNRRDGKGNLKGSLAATQMGLIYVNPEGPNGNHDPISAAADIRRAFGNMAMNDEETLALIAGGHTFGKAHGAHKPEECMGAEPSAAGIESQGMGWANKCGKGNAEDTITSGLEGAWSANPIAFTNQYLDNLFGFEWVKAKSPAGATQWIPSDPNAANMVPDAHIPGKTHAPIMFTTDIAIKEDPGFR…
AZE99_08305_AMO71851.1	AMO71851.1	CP014545.1	Sphingorhabdus sp. M41	catalase-peroxidase Group 3	MDMKTTGSPEGCPMGFEGGVRSLLGRTNRDWWPDSLQLEILTQGGTSPDPMGPDFDYIKAFKALDYQALKDDLKALMTDSQPWWPADYGHYGPFFIRMAWHAAGTYRTGDGRGGASSGQQRFAPLNSWPDNGNLDKARRLLWPIKKKYGEHISWADLFVLTGNVAIESMGGPVFGFGGGRKDVYEPEKDVYWGSEEQWVNEGVATRINPDEGKAMENPLAAIQMGLIYVNPEGPGGNPHDAEGMARDMKETFARMAMNDEETVALTAGGHAFGKCHGAVPPDQLSGDPESGDLQLMGFGWATDPEQIGEGHITTSGLEGAWTPNPTQWGGDYFRLLFKYDYELVESPAGAKQWQPINPDPEDMAPDARDPSKKVPTMMTTADMALKRDPDYRKISERFR…
AZE99_09310_AMO72018.1	AMO72018.1	CP014545.1	Sphingorhabdus sp. M41	typical catalase Group 5	MFPTKEKAMTDLKLGENGEPRQTATGNDDIMTTQQGMPVSDDQNSLKSHARGGTMLEDQIMREKIFHFDHERIPERVVHARGYGVHGHFELTEAIPELSSADIFQRVGEKTPLFCRFSTVAGSKGSPDVARDVRGFAVKFYTKEGNWDLVGNNIPVFFIQDAIKFPDLIHSVKPAPDRGFPQAQSAHDNFWDFVTLSPESMHMIMWVMSDRAIPRSLRFMEGFGVHTFRLVNADGKSHFVKFHWKPKQGMQSVVWNEALKINGMDPDFHRRDMWDAVDSGDYPEWELGVQVFDDKFADEFEFDVLDPTKLIPEEQVPVRIIGKMVLDNNVDNFFAETEQVAFCTQNIVPGIDFTNDPLLQGRNFSYLDTQLKRLGSPNFTHIPVNAPKCPVRHYQQDGH…
AZF00_10195_AMO68644.1	AMO68644.1	CP014544.1	Zhongshania aliphaticivorans	catalase-peroxidase Group 2	MKPTSLFTGAAAGLTLLVSLNAAAADVVSPSNQFWWPDKLNLDQLRAHDAKSNPYGEDFNYAEAFKSVDINALKQDIEKTLKTSQDWWPADWGHYGGLMIRMAWHAAGTYRTADGRGGAEGAQQRFEPLNSWPDNVSLDKARRLLEPVKQKYGRNVSWGDLMILAGNVSLESMGFKTLGFAGGRVDDWEADHVYWGAETKWLANDKRYKDGKLENPLAAVQMGLIYVNPEGPNANHDPLSAAQDMRLSFGRMAMNDEEIVALVAGGHTLGKAHGAKKGECVGAAPAAAAIEDQGFGWKNKCGKGNAEDTMTSGLEGAWTATPTRWSILYLSNLMSFEWQKTKSPAGATQWTPTDTSAANMVPDAHIPGKRSAPIMFTTDMALKKDPGFRKIIEHFLANP…
AZF00_18265_AMO70128.1	AMO70128.1	CP014544.1	Zhongshania aliphaticivorans	catalase-peroxidase Group 3	MSANKNELSGGKCPVMHGSQTKVGGQTTANQDWWPNQLNLKILHQHSTKSNPMGGDFDYAEEFNKLDLAALKNDLTTLMTDSQDWWPADYGHYGPFFIRMAWHSAGTYRIGDGRGGAGAGSQRFAPLNSWPDNGNLDKARRLLWPIKQKYGSKISWADLMILAGNVALESMGFKTFGFAGGRADIWEPEEDISWGAEREWLGDTRYSGDRELDNPLAAVQMGLIYVNPEGPNGEPDPLGSARDIRETFARMAMDDEETVALVAGGHTFGKTHGAGDTAHVGPEPEAANIEEQGLGWINSFGSGKAGDTITSGLEGAWTATPITWDNSYFDTLFGNEWELTKSPAGAQQWTPKGDAAKNTVPDAHDPNKRHAPMMSTADLALREDPEYNRISKRFHANPA…
AZF01_12985_AMM86831.1	AMM86831.1	CP014275.1	Martelella sp. AD-3	typical catalase Group 7	MADKPTLTTTAGAAVPDNQNSITAGPRGGVMIQDYQLIEKLAHQNRERIPERVVHAKGWGAFGTLKITGDISKYTKAKCLQPGAETPMLARFSTVAGELGAADAERDVRGFALKFYTEDGNWDLVGNNTPVFFVRDPYKFPDFIHTQKRHPRTNLRSPKAMWDFWSLSPESLHQVTILMSDRGIPVDPTFMNGYGSHTYSLWNDAGERFWVKFHFKTEQGHKHYTNDEAETLIGKSRETYQEALFDKVETGNYPRWKVQVQIMPEADADKTAYNPFDLTKVWPHGDYPPIDIGVMELNRNADNYFAEIEQAAFSPSNIVPGISHSPDKMLQARIFSYADAHRYRLGTHYEALPVNAPKCPVHHYHKDGQMNFFGQKTGATDAYYEPNSMGGAVEDRSAM…
AZKH_0717_BAL23057.1	BAL23057.1	AP012304.1	Azoarcus sp. KH32C	typical catalase Group 7	MTDKKRLTTAAGAPVPDNQNTMTAGPRGPALLQDVWLLEKLAHFDREVIPERRMHAKGSGAYGTFTVTHDITKYTRAKLFSQIGKKTELFARFTTVAGERGAADAERDIRGFALKFYTEEGNWDLVGNNTPVFFLRDPLKFPDLNHAVKRDPRTNLRSAKNNWDFWTSLPEALHQITIVMSDRGIPASYRHMHGFGSHTFSFINAQNERHWVKFHFKTQQGIKNLTDAEAEALIGKDRESHQRDLYEAIERGDFPKWTLYVQVMPEKDASKVPYHPFDLTKVWPHKDYPLIEVGVMELNRNPENFFAEVEQSAFNPAAVVPGIGFSPDKMLQARLFSYGDAQRYRLGVNHHQIPVNAPRCPVHSYHRDGQMRVDGNHGGTLGYEPNSYGEWQEQPDYRE…
AZL_a04090_BAI73940.1	BAI73940.1	AP010947.1	Azospirillum sp. B510	Mn-catalase Group 03	MFMHNKKLMYTVRVSEPNPVLASLMLEQFGGPQGELAAAMRYFTQGLADEDPGRKDMLIDIATEELSHLEIIGSIVAMLTKGAKGTLAEGAESTADLYANITQGNGSHTLSLLHGGGPALVNSAGQLWSGGYIDSIGEPTADLRSNVAAEARAKIIYERLINVTDDPGVKDALGFLMTREIAHQKSFEKALYAIDNNFPPGKLPGMADYTDKYYNMSQGDGDMRGPWNQGAQWEFVDIKPTDAPVNGGDGNPTVKLAASELAAVNAVAARTMSKPDADPITGADLGAGPGAGKTKATTGG
AZL_c00160_BAI75309.1	BAI75309.1	AP010949.1	Azospirillum sp. B510	typical catalase Group 7	MTRMSTLTTSFGQPVPDNQNSLSAGPRGPLLLQDFHLIEKLAHFNRERIPERVVHAKGAGAYGTFRVTRDVTRWTKAAFLSDVGKETGVFLRFSTVGGEKGSADAERDPRGFAIKFYTEEGNYDLVGNNTPIFFLRDPLKFPDFIHTQKRNPATNLKDPTAMWDFFSLSPETMHQLTILFSDRGTPRGYRHMDGFGSHTFSWINAANERFWVKYHFKTRQGIQNFTAAQATTMAGIDPDHATRDLFAAIEDGDFPAWTVSVQIMPEAEADAYRINPFDLTKVWPHADYPLIEIGELVLNRNPENFFAETEQSAFSPASVVPGISFSPDKMLQGRLFAYADAHRYRLGGNYAQIPVNKPQGCPVHNYQRDGAMRTDGNGGGRPNYEPNSFGGPAQTGVAS…
AZOLI_p30178_CBS90024.1	CBS90024.1	FQ311871.1	Azospirillum lipoferum 4B	catalase-peroxidase Group 4	MLHRNSPLSDPMGKEFDYAKEFQSLDLDAVIGDLHALMTESQDWWPADFGHYGGLMIRMAWHSAGTYRITDGRGGAGTGQQRFAPLNSWPDNANLDKARRLLWPIKQKYGRKLSWADLMVLAGNVALESMGFKTFGFAGGRVDAWEPEELFWGPEGTWLGDERYSGERQLADPLGAVQMGLIYVNPEGPNGNPDPVAAAKDIRETFYRMAMNDEETVALIAGGHSFGKTHGAGDPSFMGPEPEAGALEEQGLGWKSRHGTGYGADAITGGPEVIWTQTPTQWSNHFFDNLFKFEWELTKSPAGAWQWQAKDAEPSIPGPCPGSAKRLPTMLTTDLSLRFDPIYEKISRRFHENPDQFADAFARAWFKLTHRDMGPVVRYLGPLVPKETLIWQDPIPPLD…
AZOLI_p30387_CBS90214.1	CBS90214.1	FQ311871.1	Azospirillum lipoferum 4B	typical catalase Group 7	MSTLTTSFGQPVPDNQNSLSAGPRGPLLLQDFHLIEKLAHFNRERIPERVVHAKGAGAYGSFRVTRDVTGWTKAAFLSSVGKETPVFLRFSTVGGEKGSADAERDPRGFAVKFYTEEGNYDLVGNNTPVFFLRDPLKFPDFIHTQKRNPATNLKDPTAMWDFFSLSPETMHQLTILFSDRGTPRSYRHMDGFSSHTFSWINAANERFWVKYHFKTRQGIENFTAEQATVMGGIDPDHATRDLYASIEEGDFPAWTVSVQIMPEAEADDYRINPFDLTKVWPHADYPLIEIGELVLNRNPENFFAETEQAAFSPASVVPGISFSPDKMLQGRLFAYADAHRYRLGGNYAQIPVNKPQGCPVHNYQRDGAMRTDGNGGARPNYEPNSFGGPTQTGVASEPP…
Aaci_0342_ACV57401.1	ACV57401.1	CP001727.1	Alicyclobacillus acidocaldarius subsp. acidocaldarius DSM 446	typical catalase Group 6	MPRNTRSAPTTRYPVCWAIHLIEKLAHFNRERIPERVVHAKGTGAYGYFEVTHDVTRYTRAAFLSEIGKRTEVFVRFSTVGGEQGSADTERDPRGFAVKFYTEEGNYDLVGNNTPVFFIRDPLKFPDFIHTQKRHPQTHLKDPNMMWDFWSLTPESMHQVLILFSNRGTPYGYRHMHGFGSHTFSWINEDGQVVWVKYHFLTDQGIRNFRRHEAVDMAGRDPDFATRDLFDAIERKEYPSWTLYVQIMPVEDAERYAFDPFDVTKVWLHGDYPLIPVGKLVLNRNPQNYFAEVEQAAFSPAHVVPGIGFSPDKMLQGRLFAYGDAHRYRLGTNSNLLPVNRPHATTAQNYQRDGAMRLDDNGGPSPNYDPNRLGHPAPTERARGPEYPVQGLVGHYEYR…
Aaci_2165_ACV59174.1	ACV59174.1	CP001727.1	Alicyclobacillus acidocaldarius subsp. acidocaldarius DSM 446	Mn-catalase Group 01	MWIYEKKLQYPVRVSKCDPRLAKMLIEQYGGADGELSAALRYLNQRYSIPDKVIGLLTDIGTEEFAHLEMIATMVYKLTKDATPEQLREAGLGDHYVNHGYSLFYHDAAGNPWTAAYIASKGDPIADLYEDIAAEEKARATYQWIIDNTDDPDIKDSLRFLREREVIHSLRFREAVEILKEYQGSKKVF
Aave_3132_ABM33696.1	ABM33696.1	CP000512.1	Acidovorax citrulli AAC00-1	catalase-peroxidase Group 4	MTQDATKCPFHAAAASGGIINKDWWPNQLRLDLLNQHSSKSDPLGAGFDYAEEFKKLDYEGLKRDLRALMTDSQDWWPADFGHYGPQFVRMTWHAAGTYRTGDGRGGAGRGQQRFAPLNSWPDNVNIDKSRRLLWPIKQKYGQKISWADLLVLTGNVALETMGFRTFGFAGGREDTWEPDQDVYWGSEKTWLGGDARYGKGTPGDGTLVAEPAMHGHEKDRVLENPLAAVQMGLIYVNPEGPEGNPDPVAAAHDIRETFARMAMNDEETVALIAGGHTFGKTHGAGTADHVGPEPEAAGLEQQGLGWASSFGSGKAGDAITSGLEVTWTSTPAQWGNEFFENLFKFEWELTKSPAGAHQWQAKNAPATIPDAHDPSKKRVPTMLTTDLSLRFDPAYEKI…
Aave_3137_ABM33701.1	ABM33701.1	CP000512.1	Acidovorax citrulli AAC00-1	typical catalase Group 4	MKFQRLVTAAVVLHAAMAPAAFAQSVLTRDNGAPVGDNQNSQTAGPNGPSLLQDVQLIQKLQRFDRERIPERVVHARGTGVKGEFTASEDISALTKAKLFRPGERTPVFVRFSSVVHGNHSPETLRDPRGFATKFYTSEGNWDLVGNNFPTFFIRDAIKFPDMVHAFKPDPRSNLDDDSRRFDFFSHVPEATRTLTLLYSNEGTPAGYRFMDGNSVHAYKFVNAQGQVHYVKFHWKSLQGLKNLDPKQVEQVQGKDYSHMTNDLVNAIRQGDFPKWDLYIQVLKPEDLGKFDFDPLDATKIWPGIPERKIGQMVLNKNVDNFFQETEQVAMAPANIVPGIEPSEDRLLQGRVFSYSDTQLYRVGTNGLSLPVNRPRVAVNNGNQDGTLNTGHTTSGVNY…
Aave_3991_ABM34533.1	ABM34533.1	CP000512.1	Acidovorax citrulli AAC00-1	typical catalase Group 5	MPKNTLSPSDSAGKKAPHKVQAASAAATGDTARGQGGELQQQAGGGHPVLTTQQGIPVADNQNSLRPTPRGPTLLEDFILREKITHFDHERIPERIVHARGNAAHGVFELTESLEKYTTARILTEVGRQTPVFCRFSTVAGGAGSVDTPRDVRGFAVKFYTGEGNWDLVGNNIPVFFIQDAMKFPDLVHAVKMEPDRAFPQAASAHDTFWDFISLMPESLHMIMWAMSDRTIPRSLRTMEGFGVHSFRLLDAQGGSTFVKFHWRPRLGIQSTVWDEAVKLQSADNDFHRRDLFEAIQAGDFPEWDLAVQLFTEEEAARFPFDHLDPTKLVPEELVPLKTIGRMTLNRWPDNFFAETEQVAFCPANVPPGIDFSNDPLLQGRLFSYLDTQLSRLGSPNFV…
Acel_2094_ABK53866.1	ABK53866.1	CP000481.1	Acidothermus cellulolyticus 11B	typical catalase Group 6	MTETTRPVTTTDAGIPAASDEYSLTVGAGGPILLQDHYLIQKMAQFNRERVPERVVHAKGGGAFGFFETTEDVSQFTKADLFQPGRRCEVLVRFSTVAGEQGSPDTWRDPRGFAVKFYTQQGNYDLVGNNTPIFFIRDPQKFQDFIHSQKRRADSGLRDHNMQWDFWTLSPESAHQVTWLMGDRGIPKTWRHMNGYGSHTFLWQNAGGERFWIKYHFKTDQGIDFLTQDEADRIAGEDADFHRRDLYEAIRRGEHPSWTLYVQVMPFHEAADYRFNPFDLTKVWPHGDYPLIKVGRMVLNRNPDNFFAQIEQAAFEPANMVPGIGPSPDRMLLGRLFSYPDTHRYRIGTNYLQLPVNRPKVPVHSYNRDGAMRYENPGDPVYAPNSYGGPQADPSYELP…
AcetOrient_orf03841_BBC80878.1	BBC80878.1	AP018515.1	Acetobacter orientalis	typical catalase Group 5	MTKQPSHRDAVTLGDQTVQRGTGGETHQTAQGDVPTLTTQLGVPVADNQNTLKAGTRGPSLLEDFHFREKIFHFDHERIPERVVHARGYGAHGFFELTHPLSDVTCADALQRKGERVPAFVRFSTVAGSKGSFDLARDARGFAVKLYTKQGNWDIVGNNIPVFFIQDAIKFPDMVHAVKEEPDRAFPQAQSAHDNFWDFISLTPESMNMIMWVMSDRGIPRSFRFMEGFGVHTFRLVTAQGKATYAKFHWKPKQGLQSVVWNEAVKLNGADPDFHRRDLWNAIQAGQYPEWELGVQLFDDEFADSFDFDILDATKLIPEELVPVRPVGRLVLDRMVDNFFAETEQVAFCTQNIVPGIDFTNDPLLQGRNFSYLDTQLKRLGSTNFTHLPINAPKCPFHT…
Achl_1733_ACL39714.1	ACL39714.1	CP001341.1	Pseudarthrobacter chlorophenolicus A6	typical catalase Group 5	MPEETSTNIPGVPASEPASLEEPTTPREPLPPKPDQRGPEAVSPTGSPTGAPETARAQSGQYLTTAQGLRLRDTDHSLKAGSRGPILLQDHHLREKITHFDHERIPERVVHARGAGAHGVFRSYGTAANITRAGFLAKDVETPVFVRFSTVLGSRGSADAVRDTRGFSTKFYTDEGTYDLVGNNIPVFFIQDGIKFPDVVHAAKPHPDREIPQAQSAHDTFWDFVSLHTEAQAHTMWNMSDRGIPRSYRTMEGFGVHTFRFVNDEGRTTLVKFHWKPKQGVHSLLWEEAQIINGMDPDFHRRDLADAIEAGAYPEWELGVQTFPDTEDQMFEGIDLLDPTKFVPEELAPVQPIGVMMLNANPTNYFAETEQVAFHPGHLVPGIDVTNDPLLQVRLFSYL…
Achl_2782_ACL40747.1	ACL40747.1	CP001341.1	Pseudarthrobacter chlorophenolicus A6	typical catalase Group 6	MTVISTTQSGAPVTSDAHSKSVGADGAIILTDHYLVEKLAQFNRERVPERVVHAKGGGAFGTFKATEDISKYTKAAFLQPGVETEMLIRFSSVAGENGSPDTWRDPRGFAVKFYTSEGNYDLVGNNTPVFFIRDGIKFPDFIHSQKRLPGTHLRDADMQWDFWTLSPESAHQVTWLMGDRGLPASWREMQGYGSHTYQWINAEGERFWVKYHFKSNQGVKSMTSDEAEALAGSDADFYIRDLHENIEAGNLPSWDLHVQVMPYEDAKTYRFNPFDLTKVWPHADYPLIKVGTMELNRNPENYFAQIEQATFAPSNFVPGIAASPDKMLQARIFSYADAHRYRVGTNHAQIPVNQPKNEVNNYSQDGQGRFLFNAPSVPVYAPNTFGGPAAVEPQNAAGG…
Achl_3365_ACL41322.1	ACL41322.1	CP001341.1	Pseudarthrobacter chlorophenolicus A6	catalase-peroxidase Group 4	MTDPQEHPPLPASGSAQGAGHAAGQNAEGGCPVVHGGATAQGSESENPAIDAPQPKGHRPRTIADWWPNQLDLSVLHANHPAGNPLGPDFSYRNEFQKLDVEALKQDITEVLTTSQDWWPADFGHYGGLMIRMSWHAAGTYRVHDGRGGAGDGGQRFAPLNSWPDNANLDKARRLLWPVKQKYGQKLSWADLLVLAGNVALESMGFKTFGFAFGREDVWEPEEIFWGPEDAWLGDERYVAEGQMADEVGATEMGLIYVNPEGPMGNPDPLAAAAFIRETFKRMAMNDEETVALIAGGHTFGKTHGAGSADDHVGPEPEGADLESQGLGWLSTYGSGKGADTITSGLEVTWTDVPTQWSNRFFEILFGHEWELVESPAGAKQWVAKDAEKIIPDAHDPEK…
AciPR4_0041_ADV80883.1	ADV80883.1	CP002467.1	Terriglobus saanensis SP1PR4	catalase-peroxidase Group 3	MSDEMKCPVPHGQPTAQTTATETSSPLHGAVTHTSRQITRNEHWWPDRLDLAVLHQNTKLADPMGKDFDYAAEFKTLDLDAVIKDLHAVMTDSQSWWPADYGHYGPFFIRMAWHSAGTYRIHDGRGGAGMGTQRFAPLNSWPDNVSLDKARRLLWPIKQKYGKKLSWADLMILTGNVALESMGFKTFGFGGGRADVWVPQEDIFWGSEHTWLGSDRYQGERDLDNPLAAVQMGLIYVNPEGPDGKPDPVASARDIRETFGRMAMNDEETFALIAGGHTFGKGHGAHDPSKYVGPEPEGAPIEQQGLGWKNSAGKGNAEDTISSGLEGAWTTNPIKWDSEYLDNLYNFDWALKKGPGGAWQWYAVAEGETVPDAHVKDKKHLPMMFTSDLALKFDPEYEK…
AciPR4_3937_ADV84686.1	ADV84686.1	CP002467.1	Terriglobus saanensis SP1PR4	typical catalase Group 5	MKETESQKGADHGIGNGGELHQYAGGTHPQLTTQQGQVVSDDENSLKLGGTDRPGPVLLEDFVLREKINHFDHERIPERIVHARGAAAHGYFELTDSLQEFSKARILSKVGEKTPLFVRFSTVAGNAGSPDLARDVRGFAVKLYTPEGNWDLVGNNIPVFFIQDAIKFPDLIHAAKQEPDRGFPQAQTAHDTFWDFVSLTPESTHMLMWIMSDRAIPRSFRTMEGFGVHTFRLINAENKVTYVKFHWRPKLGMQSVIWDEALKINGGDPDYHRRDLWNSIDQGRFPEWELCVQLFDEEFVNRFEFDVLDATKLIPEEQIPLRVVGKMVLDRNPTNYFSETEQVAFMTQNVVPGIDFTNDPLLQGRNFSYLDTQLSRLGSPNFAQLPINAARCPVMNFQR…
AciX8_1603_AEU35942.1	AEU35942.1	CP003130.1	Granulicella mallensis MP5ACTX8	typical catalase Group 7	MKKLTTKFGAPVDNNQNIGTAGKRGPALMENVWLIEKLAHFDREVIPERRMHAKGAGAYGTFTVTHDITQYTKAKIFSEVGKQTPMFTRFSTVGGERGAADAERDIRGFAMKFYTEEGNWDLVGNNTPVFFIRDPLKFPDLNHVVKRDPRTGVHNPDAKWDFWSLLPESLHQVTITMSDRGIPRSWRHMHGFGSHTYSFINTENKRFWVKFTFKTQQGIQNLTDAEAENLIGRDRESHQRDLFESIEKGDFPRWKLYVQIMPEEDANTYRIHPFDITKVWPHADYPLIEVGVMELNRNAENFFAEVEQVAFAPTNIIPGIGFSPDKLLAGRLFSYGDAQRYRLGVNHDHIPVNAPRCPVHSYHRDGAMRTDGNGGRTISYEPNRHGEWQEQPDFSEPPL…
AciX8_3413_AEU37711.1	AEU37711.1	CP003130.1	Granulicella mallensis MP5ACTX8	typical catalase Group 7	MADKNSTNGSSPKPSTQALTTNQGRPVGDNQNSVTAGRRGPITLDDFQLFEKMAQFNRERIPERVVHAKGSGAHGNFVVTHDITKYTSAKLFSKVGNTCPMFIRFSTVGGEKGSADTARDPRGFAIKFYTEEGNWDMVGNNTPVFFIRDPLKFGDFIHTQKREPGSNLKSATMMWDFWSLSPESLHQVTILFSDRGIPDGYRHMNGYSSHTFSLINAAGELHYVKWHFKTNQGIKNLPVEEAEKLAGADPDYSQRDLHHAIERGEFPSWRVQIQVMPESEIDKFKYNPFDLTKVWPHADYPVIDVGVMTLDRMPDNYFAETEQAAFNPSNIVPGMGYSPDKMLQGRLLSYPDAHRYRIGTNYDLLPINARKNAGANYNRDGAMRFDGNYGSLPNYEPNS…
AciX8_3446_AEU37743.1	AEU37743.1	CP003130.1	Granulicella mallensis MP5ACTX8	catalase-peroxidase Group 4	MSTEAKCPFNHTAGGGTTNRDWWPSQLNLRILHQHTSLSDPLDKDFNYAEAFKSLDLAAVKKDLLAVMTTSQDWWPADFGHYGPFFIRMAWHSAGTYRTGDGRGGAGSGQQRFAPLNSWPDNVSLDKARRLIWPVKQKYGNKISWADLIVLTGNVALESMGFKTFGFAGGRADVWEPDEDIYWGTETTWLGGDHRYGKGKPADEGVLVADAALHGTEKDRTGAGSNERNLENPLAAVQMGLIYVNPEGPDGNPDPIASAHDIRETFARMAMNDEETVALIAGGHTFGKTHGAGPSSHVGPEPEAAGLEEQGLGWKSSFGTGKGGDAITSGLEVIWTTKPTTWSNEFFEHLFAYEWELTKSPAGAHQWKPKGDAGAGTVPDPHDSTKRRTPSMLTTDLAL…
AciX9_0705_ADW67775.1	ADW67775.1	CP002480.1	Granulicella tundricola MP5ACTX9	typical catalase Group 5	MAKLGHEEAADHSIGNGGELHQAAGETHPPMSSQRGLIIADDENSLKANERGPVLIEDHLLIEKTQHFDHERIPERVVHARGYGAKGYFELTDSLEGISKAGVLTRVGEKTPAFVRFSTVAGNAGSSDLARDVRGFAVKMYTPEGNWDIVGNNIPVFFIQDSIKFTDLIHSVKQEPDRGFPQAQSAHDTFWDFVSLVPESTHMLMWIMSDRAIPRSFRMMEGFGVHTFRLINNAGKSTYVKFHWRPKLGMESVIWDEALKISGADPDFHRRDLWNAIDEGNFPEWELGVQLFDEEFAQSFDFDVLDATKLIPEETLPLRIIGKLVLDRNVDNYFAETEQVAFATTNVVPGIDFSNDPLLQGRNLSYIDTQLTRLGTPNYQQIPVNAPRCPVMNMQRDGH…
AciX9_4037_ADW70832.1	ADW70832.1	CP002481.1	Granulicella tundricola MP5ACTX9	catalase-peroxidase Group 3	MSNEMKCPVPHGNNPSITSTETESPMHGAVTHNSRKIQRNEHWWPDRLDLAVLHQNNKLADPTGADFEYAKEFKTLDLDAVIKDLHVLMTDSQSWWPADYGHYGPFFIRMAWHSAGTYRTYDGRGGAGMGTQRFAPLNSWPDNVSLDKARRLLWPIKQKYGKKISWADLMILTGNVALESMGFKTFGYAGGRADVWVPQEDIFWGTEHTWLGSDRYQGDRELDKPLAAVQMGLIYVNPEGPDGKPDPVGSARDIRETFGRMAMNDEETFALISGGHTFGKAHGAHDPGPNVGPEPEGAPIEQQGLGWKNSVGKGNAEDTISSGLEGAWTSSPIKWDSEYLDNLYNYDWALKKGPGGAWQWYAVSEPANIPDAHIADKKHLPMMFTSDMALKFDPEYEKI…
Acid345_1356_ABF40358.1	ABF40358.1	CP000360.1	Candidatus Koribacter versatilis Ellin345	catalase-peroxidase Group 3	MENELVSKVKAPVPGNQTNTLNEAKCPVGAHTLAGARSNANWWPNQLNINILHQHSPLSDPMPEGFNYAEEFKTLDLDAVVKDLRHLMTDSQPWWPADYGHYGPFFIRMAWHSAGTYRIGDGRGGAGSGEQRFAPLNSWPDNGNLDKARRLLWPIKQKYGRKLSWADLMVLAGNVALESMGFKTFGFAGGREDVWEPSEDIYWGPEGKWLDDKRYSGERDLENPLGAVQMGLIYVNPEGPNGKPDPAAAAVDIRETFARMAMNDEETVALIAGGHTFGKTHGAGVPTEYVGPEPEGAGIEEQGLGWKNKLGHGHGYHTITSGLEGAWTTNPIKWDNGFFDNLFGYDWELTKSPAGANQWTPKNGAGKDTVPDAHDKTKRHAPFMATTDISLKVDPIYGP…
Acid345_1673_ABF40674.1	ABF40674.1	CP000360.1	Candidatus Koribacter versatilis Ellin345	Mn-catalase Group 03	MYHHVKKLMYTVHVDAPDPRFGNMLLEQFGGANGELAAAMQYSIQGWNCEDMARKDMLLDIGTEELSHLEVVGNLIRMHLRPMKTERTAAEADPLVAIAGGGGVCLNNSIGAPWTADYLKITGDLAVDLRSNIAAEARAKIVYERLIGFTDDAGTKQALQFLMTREITHMRAFSAALESMEKPPFSIGTIAPTPHLVDQYVNASTGTGDDGETDHVGPWNQSHGLQIVGPDNGNALDVRAYDPIPGTEKTSRVDSTPVGDRKILKHDASKSNREKVA
Acry_1147_ABQ30359.1	ABQ30359.1	CP000697.1	Acidiphilium cryptum JF-5	typical catalase Group 7	MTDTPFTNATGAPVAENTNVMTAGPRGPVLLQDIWLIEKLAHFDREVIPERRMHAKGWGAYGSFTVTQDITRYTKAKIFSDIGKRTDIFVRFSSVAGERGAADAERDIRGFSVKFYTEEGNWDIVGNNTPVFFFRDPLRFPDLNHAIKRDPRTGLRSADNNWDFWTLLPEALHQVTIVMSERGIPKSFRHMHGFGSHTFSMINAANERVWVKFHFRSQQGIANLTDAEAEAVVARDRESHGRDLLAAIEAGNLPRWTLMIQVMTEAQAKVHRHNPFDLTKVWPNAEYPLIEVGVLELDRAPDNYFAEVEQAAFSPANIVPGISFSPDRMLQARLFSYGDAQRYRLGVNFNQIPVNAPRCPFRSYHRDGAMRTDGNLGGIVSYHPNTGRIWDDQPAHAEP…
Acry_1851_ABQ31053.1	ABQ31053.1	CP000697.1	Acidiphilium cryptum JF-5	catalase-peroxidase Group 4	MSTEAKCPVTGGATRSSSAGIQSNADWWPNQINLGMLHQHSALSNPMDPDFDYAAEFKTLDLDAVIADLKALMTDSQDWWPADFGHYGPLFVRMAWHAAGTYRIGDGRGGAGAGQQRFAPLNSWPDNANLDKARRLLWPVKQKYGRKISWADLMVLAGNVALESMGFKTFGFGAGRVDTWEPDQGIYWGPETTWLDDKRYSGDRDLENPLAAVQMGLIYVNPEGPNGKPDPVAAARDIRETFARMAMNDEETVALIAGGHTFGKTHGAGDAALVGPEPEAAPIEQQGLGWISSYGTGKGSDAITGGPEVTWTQTPTQWSNFYFDNLFNYEWELTKSPAGAWQWVAKDAGDVIPDAFDAAKKHRPTMLTTDLSMRMDPAYEKISRRFHQNPDEFADAFAR…
Aeqsu_1387_AFL80880.1	AFL80880.1	CP003280.1	Aequorivita sublithincola DSM 14238	catalase-peroxidase Group 3	MENGKDKNFHKNGNPSGNTSDVWEINDDSAAQCPYFGNTQQQVAGGGPTNSEWWPNSLRLNVLRQQSSKSNPMDKDFDYKKEFEKLDYNALKKDLVHLMTDSQDWWPADYGHYGGLFIRMAWHSAGTYRVTDGRGGGNSANQRFAPLNSWPDNGNLDKARLLLWPIKQKYGRKISWADLLQLAGNCALESMGFKTFGFGAGRLDVWEPEQDVYWGSETQWLGNDKRYEDGHLEKPLAAAHMGLIYVNPEGPNGVPDPLGSAHDIRETFGRMAMDDYETVALIAGGHTFGKAHGAGDAEKYVDSEPAGAGIEHQSKGWISSYKSGFGDDTITSGLEGAWTPTPDKWDHEYFRVLLDYDWEKTKSPAGAHQWKPTAASNAFKAPMAHDPSKTQDLMMTTAD…
Aeqsu_3128_AFL82563.1	AFL82563.1	CP003280.1	Aequorivita sublithincola DSM 14238	typical catalase Group 5	MCAKKKDSISRKTEQLKQFEKSFEGQTMTTRQGLKVNDTNNSLKAGERGPTLLEDFLLREKIHNFDHERIPERIVHARGSGAHGYFELYESIEEYSKAGIFTDTSRKTPVFVRFSTVAGSKGSTDLARDVRGFAVKFYTEEGTWDLVGNNMPIFFIQDAMKFPDLVHSVKPEPNKEIPQAASAHDTFYDFVSLTPETLHNQIWVMSDRAIPRSLRMMEGFGIHTFRLINKEGKAHFVKFHWKPKLGIHSVTWEEAVKISGADSDFHRRDLWDAIDAGMFPEWELGLQIIPEEDEHKYDFDLLDPTKLVPEEVVPVKIIGKMTLNKNPENFFAETEQVAFLPGNIVPGIDFTNDPLLQGRLFSYRDTQLSRLGSHNFHQLPINRPIGEVHNNQRDGHMQM…
Afer_0295_ACU53264.1	ACU53264.1	CP001631.1	Acidimicrobium ferrooxidans DSM 10331	catalase-peroxidase Group 4	MDEMTDAQGCPVLHTVELANAAKQWWPNQVNLKVLDGPAPNRSPYGPSFEYRAALASLDVEALRRDLIELMTTSQPWWPADFGHYGPLFIRMAWHSAGTYRIADGRGGASRGAQRFAPVGSWPDNANLDKARRLLWPIKQRYGRALSWADLIVFAGNVALEAMGLRTIGFAFGREDAFEPPLDTYWGPERTWLGDERHDEEGELENPFGAVQMGLIYVNPEGPSGHPDPLAAARDIRETFRRMAMNDAETVALIVGGHTFGKFHGAAPASFVGPEPDGAPLEQQGLGWRNTYGTGMGNDTYTGGPEGIWTPTPTQWDNTFLEQLFAYDWELERSPAGAYQWTPRNPEAQGTVPDAHDPTVRHAPTMLTTDLALREDPIYREIALRFRDHPDELADAFAR…
Alide2_1655_AEB84046.1	AEB84046.1	CP002657.1	Alicycliphilus denitrificans K601	typical catalase Group 7	MTDKQKLTTAFGCPVVDNQNTMTAGPRGPVLLQDVWLLEKLAHFDREVIPERRMHAKGSGAYGTFTVTNDITKYTKARIFSEVGKKTELFARFTTVAGERGAADAERDIRGFAVKFYTEQGNWDMVGNNTPVFFLRDPLKFPDLNHAVKRDPRTNMRSAQNNWDFWTSLPEALHQVTIVMSERGIPASYRTMHGFGSHTFSFINAANERFWVKFHFKCQQGIRNLTGAEAEALIGKDRESHQRDLYDAIEAGDFPRWKFMIQVMPEKDASRVPYNPFDLTKVWPHGDYPLIEVGVMELNRNPENFFAEVEQAAFNPASVVPGIGFSPDKMLQARLFSYGDAQRYRLGVNHYQIPVNAPRCPAHHYHRDGAMRVDGNFGSTRGYEPNSYGEWAEQPDFRE…
Alvin_0483_ADC61441.1	ADC61441.1	CP001896.1	Allochromatium vinosum DSM 180	catalase-peroxidase Group 3	MDTNATTAGKCPVMHGGHTAAGSSNMDWWPKALNLDILHQHDTKTNPLDPDFDYREAVKTLDFEAVKKDLHALMTDSQDWWPADWGHYGGLMIRMAWHAAGTYRIADGRGGASTGNQRFAPINSWPDNVNLDKARRLLWPIKRKYGNALSWADLIVLAGTVAYESMGLKTFGFAFGREDIWHPEKDIYWGSEKEWLAPSDNPNSRYSGERDLDNPLAAVMMGLIYVNPEGVDGQPDPLKTAHDVRVTFARMAMNDEETVALTAGGHTVGKAHGNGDAKLLGPEPEGAGVEDQGLGWLNKTARGIGRDAVTSGIEGAWTTHPTRWDNGYFHLLLDYEWELKKSPAGAWQWEPIDIKEEDKPVDVEDPSIRRNPIMTDADMAMKMDPEYRKISERFRQDPE…
Amet_0511_ABR46738.1	ABR46738.1	CP000724.1	Alkaliphilus metalliredigens QYMF	typical catalase Group 5	MNTGPQQPQNTMEQNSKNEKLDLHRVDHNNELLTTNQGGRVSNTDDSLKAGARGPTLMEDFHFREKMTHFDHERIPERVVHARGFGVHGYFQVYEPMAELTKAKFLQDPTKKTPVFVRFSTVVGSKGSADTVRDVRGFATKFYTEDGNYDLVSNNIPVFFIQDAIKFPDVVHAIKPEPHNEIPQASAAHDTFWDFVVNTPETAHMIMWLLSDRAIPRSFRMMEGFGVNTFRFVNEQGKARFVKFHWKPLLGVHSLVWDEAQKLAGKDPDYHRRDLWDAIDMGEYPEYELGVQIVEEEEEFNFDFDILDATKIWPEEMIPVKRIGKMTLDNNVANFFAETEQVAFHPGHVVPGIDFSNDPLLQGRLFSYLDTQLIRLGGPNFHEIPINRPMAPIHNNQRD…
Amet_1570_ABR47750.1	ABR47750.1	CP000724.1	Alkaliphilus metalliredigens QYMF	catalase-peroxidase Group 3	MQEKGKCPVTGMTKHKTSGGTTNQDWWPNQLNLKMLHQNPTMRNPMGERFNYAEEFKKLDFEALKNDLYALMTDSQEWWPADYGHYGPLFIRMAWHSAGTYRMGDGRGGAGTGNQRFAPLNSWPDNVNLDKARRLLWPIKQKYGKKISWADLMILAGNCALESMGFKTFGFAGGREDIWEPEEDIYWGQENEWLGDKRYSGDRELENPLAAVQMGLIYVNPEGPNGQPSALASGKDIRDTFARMAMNDEETVALVAGGHTFGKCHGAGSATHVGPEPEAANIEEQGLGWKNSMGSGKGIHTISSGIEGAWTPTPIKWDNSYLDTLFNYDWDLVKSPAGAWQWVPTDPTAADSVPDAHDPSKRHAPMMTTADLALRMDPIYGPIAKGFRENPEAFADAFG…
Amir_0222_ACU34193.1	ACU34193.1	CP001630.1	Actinosynnema mirum DSM 43827	typical catalase Group 6	MTDARPTTNNAGIPIASDDHSLTLGPNGPILLQDHYLIEKNAQFNRERVPERVVHAKGGGAFGHFTTTADVSRYTKAALFQPGVRTEALLRFSTVAGELGSPDTWRDPRGFALKLYTSQGNYDLVGNNTPVFFLRDPIKFPDFIRSQKRRVDTGRRDHDMQWDFWTLQPETAHQVTWLMGDRGIPRTWRHQNGYGSHTYLWENAEGERHWVKYHFKTDQGIETLTADEAARIAGEDADAHRADLWHAVERGEFPSWTLHVQVMPYEDAAGYRFNPFDLTKVWPQGDYPLIEVGKLVLDRNPSDHFAEIEQAAFEPTNLVPGIGASPDKMLLGRIFAYPDAHRYRIGANYAQLPVNRPKSRVDSYAKDGAMRYGNASDPVYAPNSYGGPHASAAVGSEAT…
Amir_2517_ACU36455.1	ACU36455.1	CP001630.1	Actinosynnema mirum DSM 43827	typical catalase Group 5	MESRKPAQVVKDALEKAVEKVTGAASPTAPGAPASAPPDLVEPTEPREPLPPKPDQGTPAHVTPTGADTGASPQLNSQQGAHLTTSQGLRLPDTDHSLKAGERGPTLLQDHHLREKIMHFDHERIPERVVHARGAGAHGVFIGHGTAAAVCKAGFLQEGVRTPVFTRFSTVVGSRGSADTVRDTRGFATKFYTAEGTFDLVGNNIPVFFIQDGIKFPDVIHAAKPHPDREIPQAQSAHDTFWDFVSLHTEATHHVMWQMSDRAIPRSYRTMEGFGVHTFRLVNAEGGTSLAKFHWKPKAGVHSLLWEEAQLINGVDPDFHRRDLYDSIESGAYPQWELGIQVFPDTPDQTFEGIDLLDSTKIVPEELAPVTPVGTLVLNRNPTNFFAESEQVAFHVGHL…
Amir_4193_ACU38048.1	ACU38048.1	CP001630.1	Actinosynnema mirum DSM 43827	catalase-peroxidase Group 4	MSDSPNAVVGDMNVEEAGGCPVAHGRFSHPTEGGSNRDWWPNQLNLAILRKHSPVADPMGGDFDYAAEFATLDLDALAADVDALLTTSQDWWPADFGHYGPLMIRMAWHSAGTYRTHDGRGGAGAGMQRFAPLNSWPDNGNLDKARRLLWPVKRKYGRKISWADLMIFAGNRALETMGFKTFGFAGGRADVWEPDQDVYWGPERTWLGDERYTGDRELENPLAAVQMGLIYVNPEGPNGNPDPVASARDIRETFGRMAMNDEETVALIAGGHTFGKTHGAADPNVHVGPEPEGASLEEQGLGWKNTFGSGRGRDTITSGLEVTWTPTPTRWSNWFFHNLFTYEWEVTKSPAGAWQWKPKNNAAQGTVPDPESGELNRAPSMLTSDIALREDPEYGKISR…
Amir_4417_ACU38264.1	ACU38264.1	CP001630.1	Actinosynnema mirum DSM 43827	typical catalase Group 7	MTFEDSDNTDPLTTAAGAPVADNRNSLTAGPRGPMLLQDLWFLEKLAHFDREVIPERRMHAKGSGAFGKFTVTGDITRYTKAALFAQVGNECGTFVRFSTVAGERGAADAERDIRGFAVRFYTAQGNWDVVGNNTPVFFIRDPLKFPDLNRAVKRDPRTNMRNPENNWGFWTRLPEALLQITITMSDRGIPRSYRHMHGFGSHAFSMVNAAGERHWVKFHFRTRQGIENLTDAQAGELIGRDRESHHRDLYEAIERGDNPRWTLSVQVMPERDAESYRFHPFDLTKVWSKKDYPLIEVGELELNRNPENYFADVEQAAFSPANVVPGISLSPDKMLQGRLFSYGDTARYRLGVNHHQIPVNQPRAATVVNSYHRDGSMRVDGNQGGLPGVEPNSYGRWA…
Anae109_3162_ABS27358.1	ABS27358.1	CP000769.1	Anaeromyxobacter sp. Fw109-5	typical catalase Group 5	MPSKPKKPAPRPKKSPAKASARSTVGGARRGTSAARAIDRAAAKLAATDELAASMPFNATKKAEHGALARTPPRGAQVAPTDATATGSTLSETASSLKVGRGKPQDQLGVNPGNLPLDRVRVDSSGQGLTTNHGVPIADNQNSLKAGLRGPTLLEDFILREKITHFDHERIPERIVHARGSAAHGFFECTEALTGVTRASFLSEKGKRTPVFVRFSTVAGERGSADLPRDVRGFAVKFYTDEGNYDLVGNNMPVFFIQDAIKFPDLVHAVKPEPHHGMPQAASAHDTFWDFVSLMPESTHMLLWLMSDRALPRSFSMMQGFGVHTFRFVNARGEARFVKFHWNPVRGTHSLDWDECVKINGADPDYHRRDLWESIEAGQFPEWELGVQLFTEEEAGRFS…
Apre_0546_ACV28592.1	ACV28592.1	CP001708.1	Anaerococcus prevotii DSM 20548	typical catalase Group 7	MADDMKKMDPTEKNGLGDPIPSRNQNVNDDPTLRRSGGQIVDNDEDTMTAGERGHVSIQDLWLFEKHAHFNREVIPERRMHAKGWGAWGEFTVTHDISKYTRAKLFSKVGNKCKMFTRMSTVAGERGAADAERDIRGFALRFYTEEGNWDIVGNNTPVFFFRDPMKFIDLNHAVKRDPKSHLRSPNTNFDYWSSLPESLLQTTIINSDRGIPSSFRYMHGFGSHTYSMYNEDGERVWVKFHFRSEQGIQNYTDQEAEKVNGKDRESSGRDLYEAIEKGMYPKWKMYIQVMTEEEAKNHPTNPFDLTKMWLKKDYPLIPVGEYVLNKYPDNFFQDVEQAAFSPANIIPGIGLSPDRVLQARAFMYSDAQRYRLGVNHHQIPVNSPQGVKNPHDFHRDGAM…
Ark11_1402_CUT18203.1	CUT18203.1	LN906597.1	bacterium 2013Arg42i Bacteria.	typical catalase Group 7	MAQDGDRKLVMTTTTGSPVADNSNSVTAGPRGPVLIQDWHLQEKLAHQNRERIAERIVHAKGWGAYGTFTVTKDVTSYTCADFLKEVGRKTYVLARFSTVAGELGAADAERDVRGFALKFYTNQGNWDMVGNNTPVFFIRDPLKFPDFIHTQKRHPKTNLRSPTAMWDYWSASPESLHQVTILFSDRGLPQSPRFMNGYGSHTFSFWNEKGERYWIKIHFKTNQGHKFFTNSEASEVIGRSRESYQEDLYYSIENGEFPKWTMYVQIMDEKEAEKVKFNPFDLTRVWYHKDYPLVEVGTLELNRNPDNYFSEIENAAFSPSSVVPGIGFSPDKVLQARLFSYPDAHRHRLGTHYNMIPVNRPRCPVHTYNRDGQMCFFDNAPYKDAYYEPNSFNGPVAD…
ArsFIN_26240_QBY44048.1	QBY44048.1	CP038613.1	Arsenophonus nasoniae	typical catalase Group 7	MEKKEGLTTSAGSPVVDNNNVITAGPRGPMLLQDVWFLEKLAHFDREVIPERRMHAKGSGAFGTFTVTHDISQYTRAKIFSKIGKETKLFIRFSTVASERGAADAERDIRGFALKFYTEEGNWDLVGNNTPVFYLRDPLKFPDLNHVVKRDPHTNLRNPAYKWDFFSHLPESLHQLTIDMSDRGIPKSYRHMHGFGSHTYSFINEKNERFWVKFHFRCQQGIENLMDDEAERIVGKDRESSQRDLFDAINNKNYPRWKLQIQVMPEADAAKLPYNPFDLTKVWRHKDCPLIDVGEFELNRNPDNYFADVEQAAFSPANIVPGISFSPDKMLQGRLFSYGDAHRYRLGVNNFQIPVNKPLATCPFHNYHRDGAMRVDGNSGNGVTYEPNSAGLFQEQPQF…
AruCF_1416_AOU92307.1	AOU92307.1	CP017433.1	Achromobacter ruhlandii	Mn-catalase Group 03	MTMFAHNKRLQYTVRVAQTNPGLANLLLEQFGGPQGELAAACRYFTQALAEDDPGRKDMLLDIATEELSHLEVIGTLVAMLNKGAKGVLAEATESEADIYRRLNGPGNDSHVTQVLFGGGPALVNSGGQLWNAGYIDTIGDPSADLRSNIAAEARAKIIYERLINATDDPGVKEALGFLMTREVSHQRSFEKALYSMEPNFPPGKLPGDPRFANVYFNMSQGEGDTRGSWNSDEHFNYVSDRDEQCAIDGDGLASVGLAEDETKALQAMVARTASDPAVDPVTGTELGDGSMLTDRDQY
AruCF_2891_AOU93782.1	AOU93782.1	CP017433.1	Achromobacter ruhlandii	typical catalase Group 5	MASKKPSKAKAQGPVDTAFNNTDSGPGAPPAGAATPAMRRAAAVAETVQALPHHADKANEYGEEGARCPYLGAQVEPPDAVVGASTLSEREGNAKTGEGAAPGVNAVDGQLARVRADAQGQALTTNQGVPVSDNQHSLKAGLRGPALLKDFILREKITHFDHERIPERIVHARGSAAHGYFECYEPLTDLTRASLFAEKGKRTPVFVRFSTVAGERGSKDTARDVRGFAVKFYTDEGNWDLVGNNMPVFFIQDAMKFPDLVHAVKPEPHHGMPQAASAHDTFWDFVSLMPESTHMLMWLMSDRAIPRSYRMMQGFGVHTFRFVNERGESRLVKFHWNPVAGTHSQVWDEAVKVSGADPDFHRRDLWEAIDSGHGPEWELGVQVFTEEEAERFSFDVLDA…
AruCF_5722_AOU96613.1	AOU96613.1	CP017433.1	Achromobacter ruhlandii	typical catalase Group 7	MTDKKHLTTASGAPVADNTNTLTAGPRGPALLQDFWLIEKLAHFDRERIPERVVHAKGSGAYGTFTVTHDITKYTRASIFSKVGKQTPLFLRFSTVAGERGAADAERDVRGFAIKFYTDEGNWDLVGNNTPVFFIRDPLKFPDFIHTQKRDPKTNLRSATAAWDFWSLSPESLHQVTILMSDRGIPANLRQQHGFGSHTFSFVNAEGERFYVKFHFKSQQGIACLTDEEAAQVVAHDRESSQRDLFDNIEQGNFPKWTLKVQIMPAAEAETYHINPFDLTKVWPHGDYPLIEVGVLELNKNPENYFAEVEQAAFTPANVVPGIDFSPDKMLQGRLFSYGDTHRYRLGINHHQIPVNAPRCPFHSYHRDGAGRVDGNVGGTLNYEPNSAGEWKETPSAGE…
Asbog_00134_BAT18450.1	BAT18450.1	AP014690.1	Asaia bogorensis NBRC 16594	catalase-peroxidase Group 2	MRLLKFGMAALIATTTLTAMPHAARADGIENPNEFYWPTRLNLSPLRVHDSESNPYGPDFVYTRDFSKLDLAAVKADIRKTLTQSQPWWPADYGTYAPFFVRMAWHAAGTYRAMDGRGGEEGGEQRFEQLNSWPDNASLDKARRLLWPVKKKYGRDLSWGDLMVLTGNVALESMGFKTLGFAGGRADDWQSELVYWGPGTQFMSSNVDSQVKKSSVEPGGHLPKPLASTTKGLIYVNPEGPNGVPDPAAAAQMIRLAFGRMAMNDEETVALIAGGHTFGKAHGAASATKCVGVAPAAAPVEQQGLGWANHCVQGKLKATDAITSGLEGAWSADPIHFTSQYLDNLLGHEWVKTKSPAGATQWVPKDAENIVPDASDPNKLHPLMMFTTDIALRTDPSYR…
Asbog_00344_BAT18654.1	BAT18654.1	AP014690.1	Asaia bogorensis NBRC 16594	typical catalase Group 6	MSDERLKNTTTDSGAPVASTDYSLSVGADGPILMHDHYLIEQMATFNREMIPDRQPHAKGGGAFGHFEVTHDVSAYTKAKFLQKGQKTETVVRFSTVAGESGSPDTWRDPRGFSVKFYTEEGNFDMVGNNTPVFFVRDPMKFQHFIHSQKRRADNGLRDNDMQWDFWTLSPESAHQVTWLMGDRGIPASWRHMDGFSSHTYLWVNEAGERFWVKYHFKTDQGIKCLTQDQADKLAGSDADYHRRDLFNAIKRGENPSWTLKMQIMPYEDAKTYHINPFDLTKVWPQGEYPLIEVGKLTLDRNPTDFFAQIEQVAFEPNNYVPGTGLSPDKMLLARSFAYADAHRARLGVNYKQIPVNAPKCPVHSYSKGGTMRSHNVSDPVYAPNSKGGPVANGERFPE…
Asphe3_11330_ADX72315.1	ADX72315.1	CP002379.1	Pseudarthrobacter phenanthrenivorans Sphe3	typical catalase Group 5	MPEASNIHVPGVPASEPASLEEPTTPREPLPPKQDQQAPEAVSPTGSPTGAPATARAQSGQYLTTAQGLRLGDTDHSLKAGSRGPILLQDHHLREKITHFDHERIPERVVHARGAGAHGVFRSYGTAANITRAGFLAKDVETPVFVRFSTVLGSRGSADTVRDTRGFSTKFYTDEGTYDLVGNNIPVFFVQDGIKFPDIVHAAKPHPDREIPQAQSAHDTFWDFVSLHTEAQAHTMWNMSDRGIPRSYRTMEGFGVHTFRFVNAEGRTTLVKFHWKPKQGVHSLVWEEAQIINGMDPDFHRRDLADAIEAGAYPEWELGVQTFPDTEDQMFEGIDLLDPTKFVPEELAPVQPIGVMTLNANPTNFFAETEQVAFHPGHLVPGIDVTNDPLLQVRLFSYL…
Asphe3_29090_ADX74021.1	ADX74021.1	CP002379.1	Pseudarthrobacter phenanthrenivorans Sphe3	typical catalase Group 6	MTAISTTQSGAPVTSDAHSKSVGADGAIILTDHYLVEKLAQFNRERVPERVVHAKGGGAFGTFKTTEDVSKYTKAAFLQPGAETEMLIRFSSVAGENGSPDTWRDPRGFAVKFYTTEGNYDLVGNNTPVFFIRDGIKFPDFIHSQKRLPGTHLRDADMQWDFWTLSPESAHQVTWLMGDRGLPASWREMQGYGSHTYQWINAEGERFWVKYHFKSNQGVNSMSSEQAEQLAGSDADFYIRDLSENIEAGNFPSWDLHVQVMPYEDAKTYRFNPFDLTKVWPHGDYPLIKVGTMELNRNPENYFAQIEQATFAPSNFVPGIAASPDKMLQARIFSYADAHRYRVGTNHAQIPVNQPKNQVNNYSQDGAGRYLFNAPSVPVYAPNSVGGPAAVEPQNPAGG…
Asphe3_34940_ADX74596.1	ADX74596.1	CP002379.1	Pseudarthrobacter phenanthrenivorans Sphe3	catalase-peroxidase Group 4	MTDPQEHPPVPTPGSAQGLDSKVQGGCPVDHGSVTSHGSESENPAIDSPQPKGHRPRTVADWWPNQLDLSVLHANHPKGNPLGPDFSYREEFQKLDVEALKQDITEVLTTSQDWWPADFGHYGGLMIRLSWHAAGTYRVHDGRGGAGDGSQRFAPLNSWPDNANLDKARRLLWPVKQKYGQKLSWADLLVLAGNVALESMGFKTFGFAFGREDVWEPEEIFWGPEDTWLGDERYIGEGQMAEEVGSTEMGLIYVNPEGPMGNPDPKLAAAFIRETFKRMAMNDEETFALIAGGHTFGKTHGAGPADAHVGPEPEGADLEAQGLGWLSTYGSGKGADTITSGLEVTWTDRPTQWSNRFLEILFEYEWELVKSPGGAHQWVAKDAPEIIPDAHDPNKKHRP…
Astex_0553_ADU12242.1	ADU12242.1	CP002395.1	Asticcacaulis excentricus CB 48	typical catalase Group 7	MTTPLLTTTAGAPVADNQNSLSAGPRGPLLMQDYQLIEKLAHQNRERIPERVVHAKGWGAFGTFTVTHDISKYTRARVFELGATTPLLARFSTVAGELGAADAERDVRGFALKFYTSEGNWDLVGNNTPVFFIRDPLKFPDFIHTQKRHPRTNLRSSTAAWDFWSLSPEALHQVTILMSDRGIPTDPMHMDGFGSHTYSFLNADNERFWVKFHFKTRQGHAHYTNAQAANVIGQSRETYQEALFGAIEAHQYPKWDVKVQIMPELEADTTPYNPFDLTKVWPHSDYPLIDVGVIELNRNASNYFAEIEQAAFSPSNIVPGIGFSPDKVLQARLFAYADAHRYRLGTHYEALPVNAPKCPVNHYHRDGSMRFFDNFQSNPNAYYEPNSFDGPREAPQYRE…
Astex_1090_ADU12768.1	ADU12768.1	CP002395.1	Asticcacaulis excentricus CB 48	typical catalase Group 5	MDDTAKFDTIAGQGGETHQHVRHSGPHTPEGHLTTNQGIRVSDNQNSLKSGVRGPTLLEDFVLREKIFHFDHERIPERIVHARGSAAHGYFELTRSLSDITTADLFQRVGERVPVFVRFSTVAGGAGSVDTPRDVRGFAVKFYTQEGNWDLVGNNIPVFFIQDAIKFPDLVHAVKMEADRGYPQAASAHDTFWDFVSLMPESTHMLMWAMSDRTLPRAFRTMEGFGIHTFRFVNAEGKSTFVKFHWKPKLGLQSLVWDESLKIQAADNDFHRRDVFEAIDRGAFPEWELGVQLFDQALADSLPYDVLDATKIIPEEVVPVTIVGRMVLDRNPDNFFAEVEQVAYCPANIIPGIDFSNDPLLQGRLFSYLDTQLKRLGSTNFHQLPINAPKCPFQNFQRD…
Astex_1454_ADU13121.1	ADU13121.1	CP002395.1	Asticcacaulis excentricus CB 48	typical catalase Group 7	MSESKCPVMHGKIMTTTAGAPVADNQNSLSAGPRGPLLMQDYQLIEKLAHQNRERIPERVVHAKGWGAFGTFTVTHDISKYTRARVFELGATTPLLARFSTVAGELGAADAERDVRGFALKFYTSEGNWDLVGNNTPVFFIRDPLKFPDFIHTQKRHPRTNLRSSTAAWDFWSLSPEALHQVTILMSDRGIPTDPMHMDGFGSHTYSFLNADNERFWVKFHFKTRQGHAHYTNAQAANVIGQSRETYQEALFGAIEAHQYPKWDVKVQIMPELEADTTPYNPFDLTKVWPHSDYPLIDVGVIELNRNASNYFAEIEQAAFSPSNIVPGIGFSPDKVLQARLFAYADAHRYRLGTHYEALPVNAPKCPVNHYHRDGSMRFFDNFQSNPNAYYEPNSFDGP…
Asuc_0654_ABR74027.1	ABR74027.1	CP000746.1	Actinobacillus succinogenes 130Z	typical catalase Group 7	MSESKCPFHHTSLTMNNGAPVVDNQNSMTAGPRGPLLAQDLWLNEKLANFVREVIPERRMHAKGSGAFGKFTVTNDITQYTKAAIFSEVGKETELFVRFTTVAGERGAADAERDIRGFAVKFYTEQGNWDLVGNNTPVFFLRDPRKFPDLNKAVKRDPRTNMRSANNNWDFWTLLPEALHQVTIVMSERGIPASYRHMHGFGSHTYSMINAHNERFWVKFHFRTQQGIKNLTNEEAAAIIANDRESHQRDLYESIENGDFPRWTLYIQVMPETDAENVPYHPFDLTKVWPKKDYPLIEVGVMELNRNPANFFADVEQSAFAPSNLVPGISVSPDRMLQARLFNYADAQRYRLGVNFNQIPVNAPRCPVHSNARDGQGRVDGNYGSTIHYEPNSFGQWQE…
At12D13_42660_AYM65418.1	AYM65418.1	CP033035.1	Agrobacterium fabrum	catalase-peroxidase Group 3	MDATSKPAGKCPVMHGGNTASGKSVTEWWPNALNLDILHQHDTKSNPLGTSFNYREALKTLDVEALKADLRALMTDSQEWWPADWGSYVGMMARVTWHAAGSYRVTDGRGGANTGNQRFAPLNSWPDNVNTDKGRRLLWPIKKKYGNKISWADLIALAGTIAYDVAGLKTFGFAFGREDIWAPEKDTYWGDEKEWLAPSDGRYGDVSKPETLENPLAAVQMGLIYVNPEGVNGKSDPLATAAQMRETFARMGMDDEETVALTAGGHTIGKSHGNGSAANLSPDPEAAGPEYQGLGWINTKGRGIGRDTVVSGIEGAWTSEPTKWDNGFFDMLFKHEWTLTHSPAGASQWAPITIAEEDKPVDVEDASIRTIPMMTDADMALKVDPIYREISLKFKDDQD…
At12D13_45670_AYM65719.1	AYM65719.1	CP033036.1	Agrobacterium fabrum	typical catalase Group 5	MAKKPDSTSSSATIHDQQLIRGAGGELHQIATGDEPVLTTAQGAPVADDQNSLRIGPRGPLVVDDFHFREKIFHFDHERIPERVVHARGYGAHGYFETYDSLATHTKADLFQRAGERTPAFVRFSTVAGNKGSADLARDVRGFAVKLYTKEGNWDLVGNNIPVFFIQDAIKFPDLVHAAKQEPDRAFPQAQTAHDTFWDFISLTPESMNMVMWIMSDRTIPRSFRFMEGFGVHTFRFINAKEQSTFVKFHWKPKLGLQSVAWNEAVKINGADPDFHRRDLWTAIQSGNFPEWELQVQLFDQDFADSFDFDVLDPTKIIPEEILAPKPVGRLVLDRMPDNFFAETEQVAFMTQNVPPGIDFSNDPLLQGRNFSYLDTQLKRLGGPNFTHLPINAPKCPFA…
At12D13_47830_AYM65935.1	AYM65935.1	CP033036.1	Agrobacterium fabrum	typical catalase Group 5	MARKPNSTSSVTATIHDQQLIRGAGGELHQIATGDEPVLTTAQGAPVADDQNSLRIGPRGPLVVDDFHFREKIFHFDHERIPERVVHARGYGAHGYFETYDSLATHTKADLFQRAGERTPAFVRFSTVAGNKGSADLARDVRGFAVKLYTKEGNWDLVGNNIPVFFIQDAIKFPDLVHAAKQEPDRAFPQAQTAHDTFWDFISLTPESMNMVMWIMSDRTIPRSFRFMEGFGVHTFRFINAKEQSTFVKFHWKPKLGLQSVAWNEAVKINGADPDFHRRDLWTAIQSGNFPEWELQVQLFDQDFADSFDFDVLDPTKIIPEEILAPKPVGRLVLDRMPDNFFAETEQVAFMTQNVPPGIDFSNDPLLQGRNFSYLDTQLKRLGGPNFTHLPINAPKCPF…
Avin_05880_ACO76841.1	ACO76841.1	CP001157.1	Azotobacter vinelandii DJ	catalase-peroxidase Group 4	MSSEKSETKCPFNHAVGGGTSNRDWWPNQLRLDLLHQHSSKSNPMDEGFDYAEEFKGLDLEAVKQDLRTLMTDSQDWWPADFGQYGPLFIRMAWHSAGTYRVGDGRGGAGRGQQRFAPLNSWPDNVSLDKARRLIWPIKQKYGRKISWADLIILTGNVALESMGFKTFGFAGGREDVWEPDQDVYWGRETTWLATSDKPNSRYSGDRDLENPLAAVQMGLIYVNPEGPDGNPDPLAAARDIRETFARMAMNDEETVALIAGGHTFGKTHGAGDVSHVGADPEAADLEAQGLGWRNSFGSGKGADTITSGLEVTWTSTPTRWSNNFFWNLFGYEWELTKSPAGAHQWVAKGAGASIPHAHDPSKKLLPTMLTTDLALRFDPAYEKIARRFYENPDEFADA…
Avin_47080_ACO80813.1	ACO80813.1	CP001157.1	Azotobacter vinelandii DJ	Mn-catalase Group 03	MFVHNKRLQYTVRVAAPNPGLANLLLEQFGGPQGELAAAMRYFTQGLAEDDAGRKDLLMDIATEELSHLEIIGSIVGMLNKGAKGQLAEGVEQEAELYRSLTGGGNDSHITSLLYGGGPALTNSGGIPWSAAYIDTIGEPTADLRSNIAAEARAKIIYERLINVTDDPGIQDALKFLMTRELAHQKSFEKALHALQPNFPEGKLAGMPEFTNTYFNMSQGADDVRGPWNQGAEWKFVETPQPAVDGGDGMATVNLPDKDAQVWKQMAMRTLSNPTADPLTGADLGSGKTQH
AzCIB_1231_AKU11136.1	AKU11136.1	CP011072.1	Azoarcus sp. CIB	catalase-peroxidase Group 3	MSNENKCPVAGMHGARATVGVRSNRDWWPNQLNLNILHQHAPASSPMGGDFDYAAEFGKLDLAALKKDLYALMTDSQDWWPADWGHYGGLFIRMAWHSAGTYRTGDGRGGGGTGNQRFAPLNSWPDNGNLDKARRLLWPIKQKYGNRISWADLVILTGNCALESMGFKTFGFGGGRADIWQPEEDTYWGNEDTWLGDKRYSGDRELANPLAAVQMGLIYVNPEGPNGNPDPVASGRDVRETFARMAMNDEETVALVAGGHTFGKAHGAGDPALVGPEPEGAPIEAQGLGWINRLGSGKGGDTTTSGIEGAWKRNPTKWDNGYFDTLFGYEWELTKSPAGAHQWVAKDVKPEDMIPDAHDPSKKHPPMMTTADLSLRFDPIYEPISRRFHRDPQALADAF…
B005_0217_AFR10247.1	AFR10247.1	CP003788.1	Nocardiopsis alba ATCC BAA-2165	typical catalase Group 6	MVDDRSESQDTTTTNAGIPVPSDEHSLSVGRDGPLLLHDAYLIEKMAQFNRERVPERVVHAKGSGAYGTFRVTEDVSAYTCADLFQPGRETPMLARFSTVAGEMGSPDTWRDPRGFALKFYTREGNYDMVGNNTPVFFMRDPQKFQDFIRSQKRDPRTGLRDNTMQWDYWSLSPESAHQVTWLMGDRGLPKTWRHMDGFSSHTYQWINARGERFWVKYHFQTDQGNDFLTQEESDRLAGEDADHHRRDLFEAIERGEYPSWTLRMQIMPVAEAADYRFNPFDLTKVWPHADYPLIEVGRMTLDHNPENHFIHIEQAAFEPANLVRGIGASPDKMLLGRIFSYPDTHRYRIGVNYNELPPHRPRVRVRSYSKDGHMRHDAPDTGAVYHPNSFGGPDAARQ…
B005_4033_AFR10141.1	AFR10141.1	CP003788.1	Nocardiopsis alba ATCC BAA-2165	typical catalase Group 7	MSHDNTQPLTTANGAPVANNQNSLTAGPRGPMLLQDLWFLEKLAHFDREVIPERRMHAKGSGAFGTFTVTKDITQYTKAALFSEVGKQSEVFLRFSTVAGERGAADAERDIRGFALRFYTEEGNWDVVGNNTPVFFFRDPLKFPDLNRAVKRDPRTNMRSAENNWDFWTNLPEALHQVTIVMSDRGIPASYRHMHGFGSHTFSFVNADNERFWVKFHFRTQQGIKNLTDQEAAEVIAEDRESSQRDLYDSIENGDYPKWTFYVQIMPEADAENYRFHPFDLTKVWSKKDYPLIEVGEFELNRNPENYHADVEQASFTPANLVPGIGVSPDRMLQGRLFSYGDAARYRLGVNHHQIPVNYPRAAKLVNTYHRDGVMRVDGNQGGVPGIEPNSYGRWQEQP…
B005_5150_AFR09255.1	AFR09255.1	CP003788.1	Nocardiopsis alba ATCC BAA-2165	typical catalase Group 5	MADAERDAKDRQLDAERTESRGPLTTETGVRVEDTDNSLSVGERGPTLLEDFHAREKITHFDHERIPERVVHARGAGAYGHFTPYEDLSDLTAAHFLSGPDVTTPVFVRFSTVAGSRGSADTVRDVRGFAVKFYTEQGNYDLVGNNMPVFFIQDGIKFPDFVHAVKPEPHNEIPQAQSAHDTLWDFVGLQPETTHMIMWLMSDRAIPRSYRTMQGFGVHTFRFVDERGRGTFVKFHWRPILGTHSLVWDEAQRIQGKDPDYNRRDLWEAIERGQYPEWELGVQLVPEENEHDFSFDLLDATKIIPEEQVPVRPIGRMVLNRNPDNFFAETEQIAFHTANVVPGIDFTNDPLLQARNFSYLDTQLLRLGGSNFQQIPVNRPVARVDNNQRDGFAQHRVHR…
B0537_06160_AQS58701.1	AQS58701.1	CP019698.1	Desulfotomaculum ferrireducens	Mn-catalase Group 02	MFMHDKRLLQNVMVERPNPNYAAMLTEQLGGPQGELKAAMQYISQSFRIKNPEIKDLFMDIAAEELSHMEMVATTINLLNGHDVAALEVESGHIQNHVLTGLNPLLANASGYPWTASYVNVTGDLVADILSNIAAEQRAKVVYEYLYRQINDKYVRQTIDFLLNREEAHNTMFREALNQIQETGSNKDWGIDQDARLYFNLSNPGSNSFSVSHPHPPAFVNPNGH
B0909_14360_AQS63569.1	AQS63569.1	CP019702.2	Agrobacterium rhizogenes	catalase-peroxidase Group 3	MDATSKPAGKCPVMHGGNTASGKSVTEWWPNALNLDILHQHDTKTNPLGTSFNYREALKTLDVEALKADLRALMTDSQEWWPADWGSYVGMMARVTWHAAGSYRVTDGRGGANTGNQRFAPLNSWPDNVNTDKGRRLLWPIKKKYGNKLSWADLIALAGTIAYDVAGLKTYGFAFGREDIWAPEKDTYWGDEKEWLAPSDGRYGDVSKPETLENPLAAVQMGLIYVNPEGVNGKSDPLATAAQMRETFARMGMDDEETVALTAGGHTIGKSHGNGSAANLSPDPEAAGPEYQGLGWINTKGRGIGRDTVVSGIEGAWTSEPTKWDNGFFDMLFKHEWTLTHSPAGASQWAPITIAEEDKPVDVEDASIRTIPMMTDADMALKVDPIYREISLRFKDDQD…
B0A89_07970_ARJ69568.1	ARJ69568.1	CP020612.1	Paracoccus contaminans	typical catalase Group 5	MATTPDKTIAPKVADQKAGNDGKTGPNPAEQRPLHDGTNSTGLTAAYAETTGAGGEPQQITQDPAARLTTNQGIPVSDNQNSLRLGARGPTLLEDFVLREKIFHFDHERIPERIVHARGSVAHGVFEVTRAIPELTRAALFQKAGNRCDVFARFSTVAGGAGSVDTPRDIRGFAVKFYTAEGNWDLVGNNTPVFFIQDAIKFPDLIHSVKMEADRGYPQAASAHTTFWDFVSLMPESLHNVMWLMSDRAIPRSLRMMEGFGIHTFRMVNAEGKSTFVRFTWKPKLGVQSLLWDESSKIQGADNDFHRRDLFESIAEGAYPQWDLGIQIIDPAWADAQPYDVLDATKLIPEEEVPVQIIGTMTLNRNVDNHFAENEQVAFCPSNVPPGIDFTDDPLLQGR…
B0A89_07975_ARJ70808.1	ARJ70808.1	CP020612.1	Paracoccus contaminans	Mn-catalase Group 06	MFMRVDQLQTELPPPRRADPNAAAALQELLGGKYGEMSTLGNYMFQSFNFRSKSKLKPFYNLVAAITAEELGHVELVSHGIAMLANGPDKPGADEKNGGDVSNAPFEQMKDIRSAASFFSHGGGAVPVNSNSMSWNVDMVTTTGNVVFDLLHNFHLECGARLHKLRVYESLTQDNATGREVCGYLLVRGSVHAHAYALALKKLTGVSIEQMLPTPNIPLDKIPECQKYLVEGSHRRLYTFSNGDYQAMRGIWEGEQALPTDPPGELIVVDGMPEGGKIHDLTGEPCAFTPDYAPEEMFEIAERLTKAAMQGAGSL
B0B39_00395_ARM32091.1	ARM32091.1	CP020894.3	Legionella longbeachae	typical catalase Group 6	MTDKDNTKKFTTTDSGIPVPSDEYSLSIGPNGPLVLHDHYLIEQMANFNREKIPERQPHAKGGGAFGYFEVTEDVSKYTKAAVFQPGTKTDVVIRFSTVAGERGSPDTWRDPRGFAVKFYTSEGNFDMVGNNTPVFFIRDPMKFQHFIRSQKRRANNNLRDHDMQWDFWTLSPESAHQVTWLMGDRGIPKNWRHMNGYSSHTYMWVNTQGEKFWVKYHFKTDQGIEFLTQEEANHLAGTDGDYHIRDLYESIERGDYPSWTLYMQIMPFKEAETYHFNPFDLTKVWPHADYPLVKVGKLTLNRNPADYHTEIEQAAFEPNNMVPGTGISPDKMLLARVFSYADAHRARLGVNYKQIPVNKPQCPVHSYSKDGAMRIENVSDPVYAPNSKGGPKADSSKN…
B0B51_04990_AQW29426.1	AQW29426.1	CP019911.1	blood disease bacterium A2-HR MARDI	typical catalase Group 7	MSKDILTTAAGAPVVDNQNSLTAGPRGPMLLEDVWFLEKLAHFDREVIPERRVHAKGSGAYGKLIVTHDITQYTKASIFAKVGKETPVFLRFSTVAGERGAADAERDPRGFALKFYTDEGNWDLVGNNTPVFFLRDPLKFPDFIHTQKRDPRTNLRNPVAAWDFFSRHPETLHQVTIVMSDRGIPRTYRHMDGFGSHTFSFINAAGERFWVKFHFKTQQGIQNYTNEEAAQVVAQDRESAQRDLVDSIDRGDFPRWNLKVQVMPEADAAAYRINPFDLTKVWPHKDYPLIDVGVLELNRNPDNYFAEVEQSAFTPANVVPGIGFSPDKMLQGRLFSYGDTQRYRLGVNHHQIPVNAPKCPFHNSFHRDGAMRTDGNLGSKLNYEPNREGAFAQDRRGEE…
B0B51_19230_AQW32032.1	AQW32032.1	CP019912.1	blood disease bacterium A2-HR MARDI	catalase-peroxidase Group 4	MSTEAKCPFKHAAAGGVSNRDWWPDQLNLKILHQHSSLSDPMDKDFNYAQAFKRLDLAAVKKDLQALMTDSQDWWPADFGHYGPLFIRMAWHSAGTYRTGDGRGGAGAGQQRFAPLNSWPDNASLDKARRLLWPIKQKYGRNISWADLMILAGNVALESMGFKTFGFAGGRKDVWEPEEDVYWGSETTWLGDQRYTGERDLENPLAAVQMGLIYVNPEGPNGNPDPLAAATDIRETFARMAMNDEETVALIAGGHSFGKTHGAGPASHVGPEPEAAGLEEQGLGWRSSFGTGKGGDAITSGLEVTWTTTPTQWSNNFFENLFGYEWELTKSPAGAHQWVAKGATATIPDAHDPSGKRLPTMLTTDLSLRFDPAYEKISRRFYEHPDQLADAFARAWFKL…
B0D95_00735_AQT62194.1	AQT62194.1	CP019799.1	Cellvibrio sp. PSBB023	catalase-peroxidase Group 2	MFKKSIPVISILALSISMVVHSGVTMADASATTNSPTTNNFWWPNQLDLSPLRQHGVESNPMGANFNYAEEFKKLDLNAVKADIKTLMTSSQDWWPADYGHYGPFFIRMAWHSAGTYRIYDGRGGAAGGQQRFEPLNSWPDNVNLDKARRLLWPIKQKYGSKISWADLMVLTGNVALESMGFKTFGFAGGRLDDWEVENVNWGSEKKWLADERHSGQRELKKPLAAVQMGLIYVNPEGPNGVPDPLLAAKDIRQAFGGMAMNDEETVALIAGGHTFGKAHGARKPEDCVGKEPAAAGLEEQGLGWTNKCGKGNAGDTISSGLEGAWSVNPIAWTTQYLDNLFAFEWVQTKSPAGAIQWIPKDGQAANLVPDAHDNTKRHAPIMFTTDLALKEDPEFRKI…
B0D95_00785_AQT58786.1	AQT58786.1	CP019799.1	Cellvibrio sp. PSBB023	catalase-peroxidase Group 3	MDNNQSAGKCPVMHGGNTASSKSNTAWWPNALNLDILHQHDRKTNPLGDDFNYAEAFKSLDLETVKSDLKALMTDSQDWWPADWGHYGGLFIRMAWHSAGSYRIADGRGGAGTGNQRFAPLNSWPDNGNLDKARRLLWPIKKKYGNKLSWADLMILAGNMAYESMGLKTFGFAGGREDIWHPEKDIYWGSEKEWLAKSGSEGTRYSGERDLENPLAAVMMGLIYVNPEGVDGNPDPQKTANDIRITFARMAMNDEETVALTAGGHTVGKAHGNGSAANLGPEPEAADVEEQGLGWNNHKTRGVGRDTVTSGIEGAWTTNPTQWDNGYFEMLLNHEWELTKSPAGAWQWKPVDIKEEDKPVDVEDPSVRCMPLMTDADMAMKVDPEYRKISERFAKDQAY…
B0E33_03745_AQQ02813.1	AQQ02813.1	CP019630.1	Labrenzia aggregata	catalase-peroxidase Group 3	MDAKVEKTGGCPVMHGGNTAMDKPVTKWWPDALNLDILHQRGARTNPMDPDFDYREAVKGLDHEAVKADVRALMTESQDWWPADWGHYGGLMIRLAWHSAGSYRMQDGRGGAGSGNIRFAPLNSWPDNASLDKARRLLWPVKKKYGNALSWADLIILAGNMAYESMGFKTFGFGFGREDIWGPETDVYWGSEKEWLAPVENRFENADDATSLENPLAAIHMGLIYVNPEGVNGQPDPVRTAAHVRETFKRMAMNDEETAALTCGGHTVGKAHGNRSAEGIGVEPEAAGVESQGFGWANTEQGGKASNAFTSGIEGAWTQFPIQFDMGYFDYLFNYDWELRKSPAGAWQWEPVNMPEDKKPVDASDPSIRRNPMMTDADMGMKMDPVYNEICRKFMADEA…
B0M43_0011290_QDW20666.1	QDW20666.1	CP042170.1	Flavobacterium sp. KBS0721	typical catalase Group 7	MDSNKKLTTATGTPVPDNQNIQTAGPRGPVLLQDFWFLEKMAHFDREVIPERRMHAKGSGAYGTFTVTHDISKYTRADLFSEIGKKTEMFVRFSTVAGERGAADAERDIRGFAMKFYTNEGNWDLVGNNTPVFFFRDPMKFPDLNHAVKRDPKTNLRSADNNWDFWTLLPEALHQVTIVMSDRGIPRSYRQMHGFGSHTFSFLNAQNERHYVKFHFVSQQGIENLSDEEAALLVGNDRESHQRDLFDAIEEGNFPKWKMFVQIMTEDQAANYRFHPFDLTKVWLKGDFPLIPVGEFELNKNPENYFAEVEQAAFNPAHVPPGISFSPDKMLQARLFSYGDAHRYRLGVNNYQIPVNSSRCPYNTFHRDGAMRVDGNNGGRKHYEPNSFGEWQEQPEFKE…
B0M43_0019590_QDW22225.1	QDW22225.1	CP042170.1	Flavobacterium sp. KBS0721	typical catalase Group 5	MKNSKKPSQDHADEKQRDLELNKSNADNQFLTTNQGVKINDNNNSLKAGERGPSLLEDFILREKITHFDHERIPERIVHARGSAAHGYFELYESMEKYTKAGFLNDKSIKTPVFVRFSTVAGSRGSTDLARDVRGFSVKFYTQEGNYDLVGNNMPVFFIQDAMKFPDLIHAVKPEPHHEMPQAASAHDTFWDFISLMPESMHMIMWVMSDRAIPRSLRMMEGFGVHTFRFINKNNESHFVKFHWKPKLGTHGVAWDEAQKISGKNSDFHRQDLWEAIEEGNFPEWELGVQIIPEADEHKFEFDLLDPTKLIPEELVPVQIIGKMVLNKNPDNFFAETEQVAFHPGHVVPGIDFSNDPLLQGRLFSYTDTQLSRLGSPNFHEIPINRTVAPMHNNQRDGH…
B0W44_09565_AQS55980.1	AQS55980.1	CP019699.1	Novibacillus thermophilus	Mn-catalase Group 07	MMKRVNRIAIELPRPEHGDLNAASAVQDLLGGKYGEMSTLNNYMFQSFNFRAKKKFKPFYDLIASITAEEFGHVELVANTINLLSYGVTQPADPDAAPLQEALDIRYPIYFTTTAQTAYPGDSMGKPWNGDYVNNSGALVQDLLHNYLLEIGARLHKMRVYEMTTHPTAREMIGYLLVRGGTHIIAYAKAIEVATGVDIGKMLPVPRPDNNKFDHARKFMEQGLYNVLYTWNEPEYQDINKIWKGKNPETGEPLRVIDGMPEGAPVPDFEMLPEQFAPGIDRDDYKRILKRLMANL
B0W44_12805_AQS56511.1	AQS56511.1	CP019699.1	Novibacillus thermophilus	Mn-catalase Group 07	MFLRVDKLQIELPKPKEGDPNAASAVQELLGGRFGEMSTLMNYMYQSFNFREKKKLKPYYDLIANISAEELGHIELVSATVNALLEKAAPNKPPHETPFKAAKDARNTHHFIATGQATLVGNSMGQPWQGDYVFNSGNLVLDLLHNFFLEVGARTQKMRVYQMTDNPVAREMVGYLLVRGGTHALAYAKALETLTGVEIKKMLPIPDIDNNKFPEARKFEEKGMHRTLYRFSLDDYKDVKAIWNGTHPDDGKELVVSDSLPEGGPVLEMEEQPESYAPGVNPEDLYEIAQKLLKNM
B0W44_12950_AQS56534.1	AQS56534.1	CP019699.1	Novibacillus thermophilus	typical catalase Group 6	MADRKKLTTATGNPVSDNQNSMTAGSRGPTLLQDIHLIEKLAHFDRERIPERVVHAKGAGAFGYFEVTHDVTKWTKAKFLSEVGKRTPMLARFSTVAGEKGSADTERDPRGFALKFYTEDGNYDLVGNNTPVFFIRDAIKFPDFIHTQKRNPATNLKDPNAAWDFWSLSPESLHQVTILFSDRGIPKSYRHMNGYGSHTFKWTNADGESVWIKYHFKTDQGIQNLTQEEATRLAGEDPDYATRDLYEAVARGDYPSWTMYVQIMPLEEAKTYRFDPFDVTKVWPHKDYPLIPVGKMVLNRNPENYFVDIEQAAFSPAKIVPGIGFSPDKMLQGRLFSYSDTHRYRLGTNYELLPPNRARNEVNNYQRDGAMRFDENGGGSVNYEPNSYNGPVESPEDKQ…
B0W47_00435_AQU86171.1	AQU86171.1	CP019875.1	Komagataeibacter nataicola	typical catalase Group 5	MTKTSKAPKAMATHVGAGGETHQTAGGDTPVMTTQQGLPVSDDQNTLRAGARGPALMEDFHFREKIFHFDHERIPERVVHARGYGAHGYFELTDSLADVCRADIFGKVGERTPAFVRFSTVAGNKGSADVVRDVRGFAVKLYTSEGNWDLVGNNIPVFFIQDAIKFPDFVHAAKQEPDRDFPQAQTAHDNFWDFVSLSPEATHMVCWAMSDRAIPRSFRFMEGFGVHTFRLINAEGQSTYVKFHWKPKLGLQSVVWNEALKINGADPDFHRRDLWQAIKSGNFPEWELGVQLFDDAFADSFDFDILDPTKLIPEELVPVRRVGRLVLDRMPDNFFAETEQVAFCTQNIIPGIDFTNDPLLQGRNFSYLDTQTKRLGGPNFTHIPINAPKCPFANFQQDG…
B0W48_02205_AQP98715.1	AQP98715.1	CP019628.1	Pseudoalteromonas aliena	catalase-peroxidase Group 3	MSNSKAGQCPVMHGSNTKASNTNTDWWPNALNLDILHQHDTKTTPYDSDFSYADAFKTLDLEALKADLKNAMTQSQEWWPADWGHYGGLMIRMAWHSAGSYRLADGRGGGGTANQRFAPLNSWPDNGNLDKARRLLWPIKKKYGNKLSWADLIILAGNMAYESMGLKTFGFAGGREDIWHPEKDVYWGAEKEWLAPSDGRYANVDKPDTMENPLAAVQMGLIYVNPEGVNGKPDPLKTAEQVRETFARMAMDDEETAALTVGGHTVGKTHGNGKAENLGPEPEAADVHEQGLGWNNTTTRGIGRDTVTSGIEGAWTTHPTKWDNGYCKLLLTYEWQLTKSPAGAHQWEPVNIKEEDKPVDVEDPSIRLNPIMTDADMAMKMDPAYRKIIERFYNDFDYF…
B0W48_02980_AQP98850.1	AQP98850.1	CP019628.1	Pseudoalteromonas aliena	typical catalase Group 4	MNTQINKTNKTKLTLSALALAIALPASAATTLTKDNGAAVGDNQNSMTAGERGSVLLEDVQLIQKLQRFARERIPERVVHARGTGAHGVFVASKELNDLTIATPFTQAGKETDVFVRFSSVIHSKGSPETLRDPRGFATKFYTDQGNWDLVGNNLPVFFIRDAIKFPDMVHSLKPSPVDNIQDPNRFFDFFSYEPGSTHMLTWVYSDYGTPASLRKMDGWGVHAYKMINKAGDVKYVKFHWVSQQGIDNLDSKEVAKVQSQNFQHLTQDLYSEVNKGNFPKWDLYIKTLDPSQLDDFDYNPLDATKMWLDIKETKVGTMTLNRMPTNFFQSTEQVAMAPANVIPGIEPSEDRLLQGRVFSYSDTQMYRLGANHQQLPINRAKVEVVNYNQDGAMNIGNT…
B0X71_15900_AQQ54437.1	AQQ54437.1	CP019640.1	Planococcus sp. Y42	Mn-catalase Group 10	MFFHRKELQYEAKPERPDPVFARKLQEVLGGQYGEMTIFMQYLFQGWSLRGNEKYKDLLMDIGTEEIAHVELLATLIARLLDGSVYEQEKASSDPTINAILSGSNPQHAIVHGLGASPKDSVGVPWNAGYIIASGNLLADFRANLNAESQGRLQVARLYGMTDDQGVKDALAFLVARDTMHQNQWIASIRDLESKEGVVTPSTFPANIEPSEHSHTLYNCSEGEESSKLDWLKMPAPDGSQFKYEQGRPFGGIPKLEPASPKAHDTLPMEDIQGDNNA
B0X71_16215_AQQ54494.1	AQQ54494.1	CP019640.1	Planococcus sp. Y42	typical catalase Group 3	MKDENKTNNQSGNNEERETLTTRQGHPVVNNQDIRTVGNRGPGTLENYHFIEKISHFDREEIPERIVHARGAGAFGYFETYGTVGDEPVEKYTRAKVFSGKGKQTPTLVRFSTVAGAKDSPETARDPRGFAVKFYTEDGNWDLVGNNIKIFFIRDAMKFPDMIHAFKADPASNIPNPERMFDFVARTPEATHMITWLFSPWGIPANYREMEGSGVNTYKWVNKDGEAVLVKYHWEPKQGVRNLTQEEANAIQATNVGHATQDLYEAIERGDYPEWELQVQIMSDDEHPELDFDPLDDTKLWPTDKFPMLPVGKMVLNRNPENYHAEIEQSAFGTGVLVDGLDFSDDKMLQGRTFSYSDTQRYRVGANYLKLPVNAPQNKVNTNQQRGAMDVHRSDEAGS…
B1812_08190_ARN83493.1	ARN83493.1	CP019948.1	Methylocystis bryophila	catalase-peroxidase Group 2	MAIVVGATMTASAEGAPHPNQFWWPDQLDLSPLRRNAAESNPLGRDFDYAKEFRSLDLAAVKKDIEAVLTTSQDWWPSDYGNYGPFFIRMAWHGAGTYRIHDGRGGAGGAQQRFEPLNSWPDNANLDKARRLLWPVKKKYGQKLSWGDLMVLTGNVAMEKMGFATFGFGGGRSDDWEPDLVYWGASKFMGNNRDKSGALEKPLGAVQMGLIYVNPVGPNGVPDPLAAAKDIREAFGRMAMNDEETVALIAGGHTFGKAHGAKSPAKCVGPAPAGEKTEAQGLGWANRCGSGKGADTITSGLEGAWSVDPVSFTTQYLDNLFGHEWVKTKSPAGATQWKPKDAEDVVPDAHEPGKAHPLMMFTTDLALKFDPEYAKIARRFHDDPNAFKLAFAKAWFKLT…
B1A86_00000830_QDW16540.1	QDW16540.1	CP042169.1	Micrococcus sp. KBS0714	Mn-catalase Group 10	MYIHKQKLQHVSSPEKPDAVYARKLQEVIGGQYGEITVAMQYSFQAWNAHIPGKYRDLLFSTAAEEFGHVEMLATMVAQLLEKAPVGITTDAIQDDPAVAAVIGGTDLQQAIVAGAGARPVDSMGNPWTGAYVTASGNLLADMTANLNAEMQGRTQVARLYHMTDDPGIRELLSFLLARDTMHQNQWAAAVKELQEDGLEEMPVPSNFPQKKEATEHSYTHYEFSDGQATAEGSWAAGPTPDGKGEFSYSSEPPAGVPMPPPTHPDSRFYGTTEVPNRVEKLAGTVQDKLHRE
B1A86_00000890_QDW16550.1	QDW16550.1	CP042169.1	Micrococcus sp. KBS0714	typical catalase Group 5	MTTQQPDIPGTPGPITPDLEEHTALTHPDQPVAVPAPDQRGPAQVSPTGQDTGADPATAAQGCPYLTTAHGVRLQDSDHSLKAGRRGPTLLQDHHLREKLSHFDHERIPERVVHARGAGAHGVFRGYGTAAKISRAGLFAKDKETEVFVRFSTVAGSRGSMDLARDTRGFATKFYTDEGTWDLVGNNIPVFFVQDAIKFPDVVHSVKPHPDREIPQAQSAHDTFWDFVSLHTEAQHHTLWNMSDRGIPRSYRMMEGFGVHTYRLIAADGSTVLVKFHWKPMLGVHSVTWEEALLTNGMDPDFHRRDLADAIEAGAFPEWELGVQVFEDNEEQMFEGIDLLDPTKLVPEELAPVQPLGRMTLNANPSNYFAETEQVAFNPANLVPGIDVTNDPLLQGRLF…
B1A86_00002085_QDW16761.1	QDW16761.1	CP042169.1	Micrococcus sp. KBS0714	typical catalase Group 6	MTEYQKTTPHATGSTRQNGAPAVSDRQSLTVGSEGPIVLHDTHLLETHQHFNRMNIPERRPHAKGSGAFGEFEVTEDVSKYTKALVFQPGTKTETLLRFSTVAGELGSPDTWRDVRGFALRFYSEEGNYDLVGNNTPIFFLRDPMKFTHFIRSQKRLPDSGLRDATMQWDFWTNNPESAHQVTYLMGPRGLPRTWREMNGYGSHTYLWVNAQGEKHWVKYHFISQQGVHNLSNDEATKIAGENADFHRQDLFESIAKGDHPKWDLYIQAIPYEEGKTYRFNPFDLTKTISKKDYPRIKVGTLTLNRNPENHFAQIESAAFSPSNTVPGIGLSPDRMLLGRAFAYHDAQLYRVGAHVNQLPVNRPKNAVHNYAFDGQMWYDHTGDRSTYAPNSNGDSWSD…
B1A86_00010340_QDW18238.1	QDW18238.1	CP042169.1	Micrococcus sp. KBS0714	Mn-catalase Group 10	MYIHKQKLQHVSSPEKPDAVYARKLQEVIGGQYGEITVAMQYSFQAWNAHIPGKYRDLLFSTAAEEFGHVEMLATMVAQLLEKAPVGITTDAIQDDPAVAAVIGGTDLQQAIVAGAGARPVDSMGNPWTGAYVTASGNLLADMTANLNAEMQGRTQVARLYHMTDDPGIRELLSFLLARDTMHQNQWAAAVKELQEDGLEEMPVPSNFPQKKEATEHSYTHYEFSDGQATAEGSWAAGPTPDGKGEFSYSSEPPAGVPMPPPTHPDSRFYGTTEVPNRVEKLAGTVQDKLHRE
B1H21_00670_AQT87197.1	AQT87197.1	CP019839.1	Enterobacter roggenkampii	catalase-peroxidase Group 4	MSTSDETNKAASVGKCPFHQGGVDHSAGAGTGSRDWWPKQLRIDLLNQHSNRSNPLGEDFDYRKEFSKLDYSALKGDLKALLTDSQPWWPADWGSYAGLFIRMAWHGAGTYRSVDGRGGAGRGQQRFAPLNSWPDNVSLDKARRLLWPIKKKYGQKISWADLFILAGNVALENSGFRTFGFGAGREDVWEPDLDVNWGDEKAWLTHRDPEALAKRPLAATEMGLIYVNPEGPNASGEPLSAAAAIRATFGNMGMNDEETVALIAGGHTLGKTHGAGEATHVGTDPEASPIEAQGLGWASTHGTGVGADAITSGLEVIWSQTPTQWSNYFFENLFKYEWVQTRSPAGAIQFEAVDAPEIMPDPFDPSKKRKPTMLVTDLTLRFDPEFEKISRRFLNDPQA…
B1H21_12070_AQT89247.1	AQT89247.1	CP019839.1	Enterobacter roggenkampii	Mn-catalase Group 03	MFRHVKQLQYTVRVAEPNPGLANLLLEQFGGPQGELAAACRYFTQGLSDDDPGRKDMLMDIATEELSHLEIIGTLVGMLNKGAKGALAEGVENEAELYRSMTENGNDSHITSLLYGGGTPLTNSAGVPWTAAYVDTIGEPTADLRSNVAAEARAKIIYERLINVTDDPGVKDALAFLMTREAAHQLSFEKALQSIRNNFPPGKLPPIEEFTNKYYNMSEGGEVRGSWNSDKHFDYVESPQPAVDGGDGSASVTLTTEQATLVKAMSARTKSDPHSDPLTGAELGAGKTKP
B1H21_13920_AQT89589.1	AQT89589.1	CP019839.1	Enterobacter roggenkampii	typical catalase Group 5	MSNKDKTHQSPIHGTEESQPGMDSLAPADGSHRPSPGPSAPCEQPTAPGSMKSPDTGNEKLKSLEPHRKGGEGFALTTNQGVRIADDQNSLRAGSRGPTLLEDFILREKITHFDHERIPERIVHARGSAAHGYFQPYKSLKAITKADFLSDPDKITPVFVRFSTVQGGAGSADTVRDIRGFATKFYTEEGIFDLVGNNTPVFFIQDAHKFPDFVHAVKPEPHWAIPQGQSAHDTFWDYVSLQPETLHNVMWAMSDRGIPRSYRTMEGFGIHTFRMINAEGKATFVRFHWKPVAGKASLVWDEAQKLTGRDPDFHRRELWESIEAGDFPEYELGLQLIPEEDEFKFDFDLLDPTKLIPEELVPVQLVGKMVLNRNPDNFFAENEQAAFHPGHIVPGLDFT…
B1H58_09590_ARJ42241.1	ARJ42241.1	CP019706.1	Pantoea alhagi	Mn-catalase Group 03	MFRHVKQLQYTVRVAEPNPGLANLLLEQFGGPQGELAAACRYFTQGLGDDDAGRKDMLLDIATEELSHLEIIGSLVGMLNKGAKGALAEGTEQEAELYRSLTGNGNDSHITALLYGGGPPLTNSAGVPWTAAYIDTIGEVTADLRSNIAAEARAKIIYERLINLTDDPGVKDALGFLMTREVAHQISFEKALYSIRNNFPPGKLPPIEKYANTYFNMSEGGDVRGSWNSDENFDYVANPQPAVDGGDGLASVMLSEQEKAMLESMALRTRSNPDIDPTTGAELGSQQLTDDAQNLTPKQ
B1H58_13785_ARJ42992.1	ARJ42992.1	CP019706.1	Pantoea alhagi	typical catalase Group 7	MNKKGLTTASGAPVAHNNNSMSAGRRGPLLLQDVWLLEKLAHFDREVIPERRMHAKGSGAYGTFTVTQDITRFSRAKLFSEVGKKTDLFIRFSTVAGERGGADAERDIRGFSMKFYTEEGNWDLVGNNTPVFYLRDPLKFPDLNHVVKRDPRTNLRNPTYKWDFFSLLPESLHQLTIDFSDRGLPRSYRHIHGFGSHTYSFINDQQERFWVKFHMRCQQGVENLMDEEAAQLIARDRESSQRDLFESIERGDFPRWKFYVQVMPEKEASQTPYNPFDLTKVWPHADYPLIEVGEFELNRNPDNYFAEVEQVAMSPANVVPGIGFSPDRMLQGRLFSYGDAHRYRLGVNHHQIPVNAPKCPFHSYHRDGAMRVDGNSGNGATYEPNSFGVFQEQPDFSEP…
B1H58_18360_ARJ43816.1	ARJ43816.1	CP019706.1	Pantoea alhagi	typical catalase Group 5	MSKETDNKELSHSAPATGPESARPGLDSLAPADGSHQPSSEPTPPGKQPTAPGSLKSPNTRNAKLDQLDAHRKGGENFPLTTNQGTRIANDQNSLKAGTRGPTLLEDFIMREKITHFDHERIPERIVHARGSAAHGYFHPYRSMSDITKADFLRDPSQATPVFVRFSTVQGGAGSADTVRDIRGFATKFYTQEGVFDLVGNNTPVFFIQDAHKFPDFVHAVKPEPHNEIPQGQSAHDTFWDYVSLQPETLHNVMWAMSDRGIPRSYRTMEGFGIHTFRMINAEGKATFVRFHWKPVAGKASLLWDEAQKLTGRDPDFHRRDLWEAIEAGDYPEYELGVQLIPEADEFKFDFDLLDATKLIPEELVPVELIGKMVLNRNPDNFFAETEQVAFHPGHIVPG…
B1H58_19195_ARJ43966.1	ARJ43966.1	CP019706.1	Pantoea alhagi	Mn-catalase Group 09	MFHHSSKMQFPVRVEKPDPEFAMLLQQAIGGVEGEIRVAMQYFFQAMGARGDARIRDLLMSTATEELGHIEMLAYAVALNLEGAPLSYQEASAKDPVVNAILGGMNPRHILSSGLAAMPVNANGMPFDMSHIYASGNVAADMLANVTAEATGRVLATRLYNMTEDKGMKDFLSFLIARDTMHQQQWLAVIEDMGGLNASLPIPNSFPQENEATEHSYYCLNTSLDKPLPKGRWSEGPSYDGKGQFTAKEKPEILGDEPLLGPARPGSGAQNEQISGSVPPAGTVK
B1L07_07975_AUZ55033.1	AUZ55033.1	CP019797.1	Stenotrophomonas acidaminiphila	typical catalase Group 5	MASKKGTPSHPPRSKDAARSDSGPAASRSRQPLRPQDEVPGLIDAWAGERAHNAGKAAEYGPDAAVPMQGEHFPAPSPAASASTVSETNASDKAGAPAAVGQDANAAPLSRVRNDGSGRRLTTNQGVPVSDNQHSLTAGLRGPALLKDFILREKITHFDHERIPERVVHARGSGAHGYFEAYEDLSALTRAAPFQAAGKITPVFARFSTVAGERGSKDTARDVRGFAVKFYTDEGNWDLVGNNMPVFFIQDAIKFPDLVHAVKPEPHHGMPQAASAHDTFWDFVSLMPESTHMLMWQMSDRAIPRSYRTMQGFGVHTFRLVNARGESVFCKFHWTPLLGTHSLVWDEAVKISGADPDYHRRDLWEAIEAGDPPEYELGIQVFSEEEADGFSFDVLDATK…
B1T45_13755_ARG62190.1	ARG62190.1	CP019884.1	Mycobacterium kansasii	typical catalase Group 5	MAANDSNPKQRQLDDCRLDGSTGYLTTQQGVRVDHTDDALTAGERGPTLLEDFHAREKITHFDHERIPERVVHARGAGAYGYFEPYDDWLAEYTAAKFLTTPGKQTPVFVRFSTVVGSRGSADTVRDVRGFATKFYTDQGNYDLVGNNFPVFFIQDGIKFPDLVHAVKPEPHNEIPQAQSAHDTLWDFVSLQPETLHTIMWLMSDRALPRSYRMMEGFGVHTFRLVNADGQGTFVKFHWKPRLGVHSLVWEECQKVAGKDPDFNRRDLWEAIEAGQYPEWEFGVQLVPESDEFNFGFDLLDATKIIPEEQVPVRPVGKMVLNRNPDNFFAETEQVAFHTANVVPGIDFTNDPLLQFRNFSYLDTQLIRLGGPNFAQLPVNRPVAEVHNNQRDGYGQHTI…
B1T45_16275_ARG62612.1	ARG62612.1	CP019884.1	Mycobacterium kansasii	typical catalase Group 6	MTERYTTTDAGSPAPSDDQSLTVGPDGPILLQDHYLIEQMAMFNRERIPERQPHAKGGGAFGHFEVTNDVSRYTRAAVFQPGTKTETLVRFSTVAGERGSPDTWRDPRGFAVKFYTSEGNFDMVGNNTPIFFIRDPLKFQHFIRSQKRRAANNLRDHNMQWDFWTLSPESAHQVTWLMGDRGIPKTWRHMNGYGSHTYSWINHAGEIFWVKYHFITDQGIDFLTQEDADRLAGEDADYHQRDLYDVIERGEFPSWTLKVQIMPFEDAKTYRFNPFDLTKVWPHRDYPLIDVGKLTLDRNVTDYHTEMEQAAFEPNNIVPGTGLSPDKMLLARGFSYSDAHRARLGTNYKQIPVNSPKVEVNSYSKDGAMRIKNITDPVYAPNSYGGPQADPARAAEVRW…
B1T45_27825_ARG64381.1	ARG64381.1	CP019884.1	Mycobacterium kansasii	catalase-peroxidase Group 4	MSSDTSESRPPHPDSNTASTSESENPAIPSPKPKAHAPLTNRDWWPDQIDVSMLHPNPPAASPLGADFDYASEFAKLDVDALKADLVEVMTTSQDWWPADYGHYGGLFIRMSWHAAGTYRIHDGRGGGGQGMQRFAPLNSWPDNASLDKARRLLWPVKKKHGNKISWADLIIFAGNVALESMGFKTFGFGFGREDVWEPEEILWGEEDEWLGTNKRYSGERDLAQPYGATTMGLIYVNPEGPEGKPDPIAAAIDIRETFGRMAMNDEETAALIVGGHSFGKTHGRGDPELVGPEPEAAPIEQQGLGWKSSYGSGKGKDAMTSGLEVVWTPTPTKWDNSFLETLYGYEWELTKSPAGAWQFTAKDGAGAGTIPDPFGGPGRVPTMLVTDISLRESPIYRD…
B2D07_17950_AQV02463.1	AQV02463.1	CP019913.2	Desulfococcus multivorans	typical catalase Group 6	MTNDDRKFTTTDAGIPVASDEFSLTVGPDGPILLHDHYLIEQMANFNREMIPDRQPHAKGSGAFGYFEVTQDVSAYTKAAVFQPGTKTDVLARFSTVAGESGSPDTWRDVRGFALKFYTTEGNYDMVGNNTPVFFVRDPMKFQHFIHSQKRRADSGLRDHDMQWDFWTLSPETAHQVTILMSDRGVPKSYRHMNGYTSHTYMWVNAKGERFWVKYHFKTDQGIEYLTQEEADRIAGQDADYHRRDLFNAVKRGDYPSWTLKVQIMPFKEAETYRFNPFDLTKVWPHADYPLHEVGRLTLNRNPDDFHTEIEQAAFEPNNLVPGIGPSPDKMLLARLVSYADAHRARLGPNYKQIPVNRPKSPVHSYSKGGAMRIDNVSDPVYAPNSKGGPKADAERYPE…
B2G51_01120_ASV10614.1	ASV10614.1	CP022887.1	Leptospira santarosai	typical catalase Group 7	MSKKTLTTAGGHPVSQNQHSITAGPRGPVLIQDTHLIEKLAHFNRERIPERVVHAKGAGAYGTLTITRDLTKYSRASVFSKVGKQTSLFLRFSTVAGERGSADTERDPRGFAIKFYTDEGIWDLVGNNTPVFFERDPLKFPDFIHSQKRDPITGYKNPFRMWDYWAKAPEALHQVTILFGDRGIPDGYRFMNGYGSHTFGLWNSQGQRYWVKFHFKSMQGIKNLTSEKASALAGTDPDYAARDLFEAIERKEFPKWKFCLQIMPEKEAETYRFNPFDLTKVWSHKDYPLIEAGVLELNSNPKNYFEEVEQAAFSPSNMPPGIGASPDKMLQGRLFAYPDAQRYRLGIRYQQLPVNKPKNTVNVYHRDGNAKFQYDGDYDNYEPNGFEGPAQDSSYAEPP…
B2G69_03065_ARO53233.1	ARO53233.1	CP021054.1	Methylorubrum zatmanii	Mn-catalase Group 06	MFMRVDKLQAELPAPKRKDPNAAAALQELLGGKYGEMSTLGNYMFQSFNFRSKDKLKPFYSLVSSITAEELGHVELVSNGVAMLNNGPDNDGDETDGGDISGAPFEDMKDIRLAAAFLSNGGGSAPINSNGASWNNDFITSTGNVVVDLLHNFHLECGARLHKLRVYETLSDPTGREVCGYLLVRGSVHAHAYALALKQITGVDLDKFLPTPNINLDKIPECQKYLQEGSHRRLYTWSPNDYRDIAGIWNSSEHALPGDPPGELEIVEGMPDGGKIHQLTGIPSAFAPDYAPEEMFEIAQKLTKKAR
B2G69_08705_ARO54219.1	ARO54219.1	CP021054.1	Methylorubrum zatmanii	typical catalase Group 7	MADQGSRLTTAFGNPVSDNQNSLTAGSRGPVLMQDYHLIEKMAHFNRERIPERVVHAKGYGAYGTFRLTKSLSEFTRAKVLTEIGKDVPMVARFSTVGGESGSADTARDPRGFALKFYTEEGNWDLVGNNTPIFFVRDAIKFSDFIRTQKRDPRTHLKPHWRRWDFWSLSPEAIHQVMFLYSDRGTPKSARFMNGYGSHTFSLWNDRGERHWVKFHFHTKQGIQNFSADEADEVAGKDPDYSSADLSTAIEQGDFPKWKASVQLMPELDADTYRINPFDLTKVWPHGDYPLIEIGEMELNRNPENYFAEIEQSAFEPSNVVPGIGFSPDKMLQNRVLSYADAHRYRLGVNYQQIPVNQGKNADVQTYHRDGAMRTDGNHGAQVDYEPNSFGGPKQDPSF…
B2G69_21430_ARO56446.1	ARO56446.1	CP021054.1	Methylorubrum zatmanii	Mn-catalase Group 09	MYYFDKKLQYPVRVDSPDPIYARMLQQAIGGVEGEIRVCMQYFFQAWGNRAPNTKYRDMLLHTATEEIGHIEMLATAVAMNLENAPTKVQEAGAADAIVGAVMGGENPRHIAEGMLHKHLLSSGMAAFPGNSDGVPFDMNHIYASGNIAADMYCNVAAEATGRTLAVRLSNATNDPGMKDMWSFLIARDTMHQQQWLAVIEELGGTEGALPIPNSFPQSEENQKFNYSFFATNRDGAPPPEGRWTAGPSIDGKGNFSVFQNEPMGQEPVLGPARPDSGAETQQIG
B2G69_23615_ARO56851.1	ARO56851.1	CP021054.1	Methylorubrum zatmanii	typical catalase Group 3	MSENRPILTTRQGHPVRDNQSTRTVGERGPATLENYQFIEKITHFDRERIPERVVHARGAGAHGWFEAYGKIGDEPASKYTRARVLNETGVKTPMFVRFSTVAGAKESPETERDPRGFAVKFKTVDGNWDLVGNNLKVFFIRDAIKFPDMIHAFKPDPVTNRQEAWRFFDFVAQHPEAIHMVTHLKSPWGIPANYREMEGSGVNTYKLVNDQGEAVLCKFHWEPKQGVRNLTSAQASEIQAKDVGHATRDLYDNIKAGNFPEWEFCVQIMPDGPNDHLSFDPLDDTKLWPVEDFPLLPVGRMVLDRVPDNFFAEVEQSAFGTGVLVDGIDFSDDKMLQGRTLSYSDTQRYRVGANYLQLPINAPQPGVKVYSNQRDGQMTYSVDGTGPNRHINYEPSTL…
B379_13820_AXM90143.1	AXM90143.1	CP025535.1	Anoxybacillus kamchatkensis G10	catalase-peroxidase Group 3	MENKCPFHGSVTNHTSNKTTNKDWWPNQLNLSILHQHDRKTNPHDETFDYAEQFQTLDYWALKEDLRKLMTTSQDWWPADYGHYGPLFIRMAWHSAGTYRIGDGRGGASTGTQRFAPLNSWPDNANLDKARRLLWPIKQKYGNKISWADLIVLAGNVAIESMGGKTIGFGAGREDVWHPEEDIYWGAEKEWLASERYTGDRELENPLAAVQMGLIYVNPEGPDGNPDPLAAARDIRETFKRMGMNDEETVALIAGGHTFGKAHGAGAASHVGPEPEAAPIEAQGLGWLSSYGKGNGRDTITSGLEGAWTPTPTQWDNSYLQLLFEYEWKLTKSPAGAYQWEAVNIKEEHLAPDVEDANVKVPPMMLTTDLALRFDPIYEKIARRFYEHPEEFADAFARA…
B379_14805_AXM90325.1	AXM90325.1	CP025535.1	Anoxybacillus kamchatkensis G10	Mn-catalase Group 07	MFTRINKLQIELPKSTYADANAAAAVQELLGGKFGEMSTLNNYLFQSFNFREKKKLKPFYDLVASITAEELGHVELVTTAINLCLTGTTHEGAPDITPMQNGVDQRNTYHFIATAQTALPGDSMGKSWSGDYVFNSGNLVLDLLHNFFLECGARTHKMRVYEMTDHPVAREMIGYLLVRGGVHVIAYAKALQIVTGVDVTKMLPIPNLSNDKFDAAKKYEAQGWHRRLYTFSEHDFQDVKQIWKGTHPLDGGQLEVIQGTPSGAPIPDLEAVEETFAPGISYEDFLEIAKRLQKSAGL
B5808_00845_ARJ03940.1	ARJ03940.1	CP020715.1	Cnuibacter physcomitrellae	Mn-catalase Group 10	MFFHKQELQFTATPAKPDAILARRMQELLGGQYGEITIAMQYGFQAWNAHIPGKYRDLLYGIGSEEFGHVEMLAIMIAQLLEKAPVEQSEEAAKSDPVLGAIIGGMDVQHAIVAGAGARPVDSNGNPWQGSYITASGNLLADFTANANGEMQGRLQAARIYNMTDDKGVRELLSFLIARDTMHQNQWTAAAAELRAEGVEDLPVPSNFPLGQEQREVSYQYLNFSDGAAAKDGSWASGPTPDGKGEFSYHDGPTTSSPMPPPTQPDPRLFGTDPKPNLIDKASGVIKDKLSDK
B5808_03510_ARJ04396.1	ARJ04396.1	CP020715.1	Cnuibacter physcomitrellae	typical catalase Group 6	MSDSSYTTTNSGAPVASDQHSMSVGRDGAIALHDHYLVEKLAQFNRERVPERVVHAKGGGAFGSFTTTGDVSQFTSASLFQKGATTDLLVRFSTVAGEQGSPDTWRDPRGFAIKFYTDEGNYDLVGNNTPVFFIRDGIKFPDFIRSQKRLPGTHLRDHDMQWDFWTLQPESAHQVTWLMGDRGLPASWRHMDGFGSHTYQWINAAGERFWVKYHFKTDQGNEILTQAQADQIAGEDADFHIRDLSTAIGRGEHPTWTLSVQVMPYADAADYRFNPFDLTKVWPHADYPLIEVGTMRLDRNPENYFAQIEQAAFAPSNFVPGIAASPDKMLLARIFSYADAHRYRVGTNHAQLPVNAPKAPVHTYSKDGAMRYDFNSSATPVYAPNSFGGPHADAARAGE…
B5D82_08385_ASP47768.1	ASP47768.1	CP020465.1	Colwellia beringensis	catalase-peroxidase Group 3	MNDKKNASGKCPVMHGGATESSMTNMEWWPKALNLDILHQHDSKTNPMTANFNYREAVKNLDIAALNKDLHALMTDSQDWWPADWGHYGGLMIRMTWHAAGTYRIADGRGGAATGNQRFTPINSWPDNANLDKARRLLWPIKKKYGNQLSWADLIAYAGTIAYASMGLKTFGFAFGREDIWHPEKDTYWGAEKEWLAPSGSENSRYSGERDLENPLASVMMGLIYVNPEGVDGKPDPLKTAHDIRVTFERMAMNDEETVALTAGGHTVGKCHGNGDASILGREPEAADISEQGTGWNNKTKRGIGRDTVTSGIEGAWTTNPTQWDNGYFSMLLKHEWELQKSPAGAWQWQPVDIKEEDKPVDVEDPTVRTMPIMTDADMAMKMDPAYREITERFANDAE…
B5J99_03640_ASR50674.1	ASR50674.1	CP020083.1	Blastomonas fulva	catalase-peroxidase Group 3	MDMKTSGMGGNCPFSNKDGGVRSLLGRTNRDWWPDSLQLDILTQNGTSPDPMGPDFDYAQAFAKLDYAALKADLKALMTDSQPWWPADYGHYGPFFIRMAWHSAGTYRTADGRGGSSSGQQRFAPLNSWPDNGNLDKARRLLWPIKQKYGKHISWADLFILTGNVAIESMGGPVFGFGGGRKDVFEPERDVYWGTEEAWVDTGAETRINPEKGWELENPLAAIQMGLIYVNPEGPGGNPDPLQSARDMRLTFERMAMNDEETVALTAGGHAFGKAHGAVPADQLSGAPESEAMELMGFGWATDAEQINTGHITTSGIEGAWTPNPTAWGGDYFRLLFKYDFELVRSPAGAQQWQPINPDPEDMAPDARDPSKRVPTMMTTADMALKMDPEYRKISERFR…
B5J99_05505_ASR53358.1	ASR53358.1	CP020083.1	Blastomonas fulva	typical catalase Group 5	MTKSAHETTTGQGGETHQQASGDTRVLTTNHGMPISDNQNSLKSGARGPTLLEDFVLREKIFHFDHERIPERIVHARGTGAHGVFEATDDISDLTRAAVFTKGEKTEVFVRFSTVAGGAGSVDTPRDVRGFAVKFYTREGNWDLVGNNIPVFFIQDAIKFPDLVHAVKMEADRGYPQAGSAHDTFWDWASLMPESTHMLMWAMSDRTLPRSLRMIEGFGVHTFKMVNAAGKASFVKFHWKPKLGIQSTIWDEALKLQAADNDYHRRDLFEAIDGGDFPEWELGIQVFDQEFADAQPYDVLDATKLIPEEDVPVRIIGTMTLNRNVDNFFAETEQVAFLPTNIVPGIDFSNDPLLQGRLFSYLDTQKSRLGTTNFHQIPVNAPRCPFGNFQRDGMMQTMV…
B5J99_08655_ASR51529.1	ASR51529.1	CP020083.1	Blastomonas fulva	catalase-peroxidase Group 2	MNRTSVSVFALLAFSLSAPAALASAENAPTVTDAPARSAAMSNQDWWPERLDLSPLRQHAAESNPMGDDFDYAKEFQTLDIAAVKKDIEALMTTSQDWWPADYGHYGPFFIRMAWHSAGTYRVTDGRGGAGGGQQRFEPLNSWPDNVNLDRARRLLWPIKQKYGRKLSWADLMVLTGNVALESMGFKTFGFAGGRTDDWEADKVYWGREKKFLAADRYHGDRQLEKPLAAVQMGLIYVNPEGPNGNPDPLAAARDIRETFGRMAMNDEETVALIAGGHTFGKAHGAHKPDDCMGADPAGSATEQQGIGWVNKCGAGKGADTITSGLEGAWSVNPIAWTSQYFDNLYAFDWVQTRSPAGAIQWIPSDKNAANLVPDAHDKTKRHAPIMFTTDLSMKMDPG…
B5M06_15170_AQZ99393.1	AQZ99393.1	CP020121.1	Comamonas kerstersii	catalase-peroxidase Group 4	MTAESKCPFHQEGQNLGTAAKGGTTNRDWWPNQLRVDLLSQHSSKSNPMGEDFNYAEEFKKLDYEALKRDLRALMTDSQDWWPADFGHYGPQFVRMAWHSAGTYRMQDGRGGAGRGQQRFAPLNSWPDNVNIDKSRRLLWPIKQKYGNKISWADLLILTGNVALETMGFRTFGFAGGRVDTWEPDQDVYWGSEKEWLAPTANPNSRYSGERDLENPLAAVQMGLIYVNPEGPDGNPDPLLSARDIRDTFARMAMNDEETVALIAGGHTFGKTHGAGPASHVGADPEAAGLEAQGLGWASSFGKGNAGDTITSGLEVTWTQTPTQWSNFFFENLFKYEWTLEKSPAGAWQWVAKDADDVIPDAHGGPRKKPTMLTSDIALRMDPAYEKISRRFLENPQAF…
B5M07_09950_AYE86410.1	AYE86410.1	CP020694.1	Sulfitobacter sp. D7	typical catalase Group 7	MSKRLTTTAGAPMPTNETSKTAGSRGPVLLDDYQLIEKLAHQNRERIPERAVHAKGWGAEGTFTVTHDISEYSCAAIFSEVGKTCEILSRWSTVAGELGAADSERDVRGFSVKFYTEEGNWDVVGNNTPIFFVRDAYKFPDFIRTQKRHPRTNLRSPEAMFDFWAAQPECVHQVTILMSDRGIPVNPMHMHGYGSHTYSMWNAKGERHWVKFHFRCQQEIRNRTNEDAEKLIGSTRENFQEDLFNAIEGGEFPKWELNIQVMPEAEAETCGFNPFDLTKVWPHADYPLIPVGMLEFNRNPDNYFQSIENAAYSPSNKVPGIGFSPDKMLQARVFSYADAHRYRLGTHYEALPANAPKAAPMHHYHKDGSMRFFPQQTGHPDAYYEPNQYEESARPDPSV…
B5M07_16855_AYE87890.1	AYE87890.1	CP020695.1	Sulfitobacter sp. D7	typical catalase Group 5	MTDKELGKGGEPRQQTTDREKTMTTAQGGPIADDQNSLKAGPRGPVLMEDHVFREKMFHFDHERIPERVVHARGYGVHGHFELKEAIPELSAADIFQRVGEKTPTFTRFSTVAGNKGSFDLARDVRGFATKFYTKEGNWDLVGNNIPVFFIQDAIKFPDLIHSVKPAPDRGFPQAQSAHDNFWDFVSLSPEATHMTLWQMSDRAIPRSFRFMEGFGVHTFRLVNAEGKSHYVKFHWKPKQGVQSVVWNEALKINGADPDFHRRDMWDAIDAGDYPQWDLGIQVFDDEFADNFEFDILDATKLIPEEQVPVRIIGTLTLDANVDNFFAETEQVAFCTHNIVRGIDHTNDPLLQGRNFSYLDTQIKRLGGPNFTHIPINAPKCPFHHFQQDGHMAMHNPKG…
B5T_04271_AFT72531.1	AFT72531.1	CP003466.1	Alcanivorax dieselolei B5	typical catalase Group 7	MSKKKQTLTTSAGIPVADNQNSLTAGPRGPLLVQDWQLFEKHAHFNRERIPERVVHAKGSAAFGTFKVTGDITQYSKAKVFQPGAETDVLLRFSTVAGERGAADAERDVRGFALKFYTEQGNWDLVGNNTPVFFVRDPYKFPDFIRTQKRDPRSNLRSATHMWDFWSLSPESLHQVTILMSDRGLPKSYRHMNGYGSHTYSFINANNERFWVKFHFKTQQGIECLTDAEAAEIVGGDRESHQRDLFNAIENKDFPTWRVCVQIMPEAEAENTPYNPFDLTKVWPHGDYPLIEVGELTLNRNPENYFAEVEQASFSPANVVPGISHSPDKMLQFRIFSYADAHRYRLGVNYESLPVNLPRCPVHGYHRDGRMRFDGNGGGSVNYEPNSFGGPVEDPAFKE…
B5V46_08200_ARC88595.1	ARC88595.1	CP020384.1	Rhodovulum sp. MB263	catalase-peroxidase Group 3	MDGNDRPAGKCPVLHTTFGGQSNRDWWPNQLNLRILHQNPSAANPMPQGFSYAEAFKALDLQAVKADLRALMTDSQDWWPADYGHYGGLFIRMAWHSAGTYRTADGRGGGGTGNQRFAPLNSWPDNVNLDKARRLLWPIKKTYGNAISWADLMILAGNVALETMGLKTFGYAGGREDIYEPEEDIYWGSEREWLATSDKPESRYSGDRELESPLAAVQMGLIYVNPEGPDGNPDPLASGRDIRETFARMAMNDYETVALTAGGHTFGKCHGAGDAALLEAEPEAAPLQAMGLGWLSRHGSGKGADAITSGIEGAWTPNPTTWDMGYFDVLFGYDWELTKSPAGAWQWTPKDLKPEDHAPDPETGERNRKIIMTTADMAMRMDPIYEPIARHFHENPDEF…
B6175_07550_AVT24040.1	AVT24040.1	CP020553.1	Staphylococcus aureus	typical catalase Group 7	MSQQDKKLTGVFGHPVSDRENSMTAGPRGPLLMQDIYFLEQMSQFDREVIPERRMHAKGSGAFGTFTVTKDITKYTNAKIFSEIGKQTEMFARFSTVAGERGAADAERDIRGFALKFYTEEGNWDLVGNNTPVFFFRDPKLFVSLNRAVKRDPRTNMRDAQNNWDFWTGLPEALHQVTILMSDRGIPKDLRHMHGFGSHTYSMYNDSGERVWVKFHFRTQQGIENLTDEEAAEIIATDRDSSQRDLFEAIEKGDYPKWTMYIQVMTEEQAKNHKDNPFDLTKVWYHDEYPLIEVGEFELNRNPDNYFMDVEQAAFAPTNIIPGLDFSPDKMLQGRLFSYGDAQRYRLGVNHWQIPVNQPKGVGIENICPFSRDGQMRVVDNNQGGGTHYYPNNHGKFDS…
B6264_01070_ARF77697.1	ARF77697.1	CP020567.1	Kitasatospora aureofaciens	typical catalase Group 6	MSKTLTTESGAPVADNQNSASAGEYGPLLLQDQHLLEKLARFNRERIPERVVHARGSGAYGYFEVTDEVSKYTRAAFLSEVGKRTELFLRFSTVAGNLGAGDAVRDPRGFAVKFYTEEGNYDLVGNNTPVFFIKDPIKFPDFIHSQKRDPYTGVQEADNVWDFWAHSPASTHQITWLFGDRGIPASYRHMNGYGSHTYQWVNAEGEAYWVKYHFKTNQGIRSLDGDQAAEVLGADADSHQRDLHQAIERGVFPSWTLYVQLMPVAEAADYRFNPFDLTKVWPHADYPLVKVGRLVLNRNPENVFAEVEQSAFSPNNFVPGIGPSPDKMLQGRLFAYADAQRYRLGVNHTQLPVNAPRATEANNYGRDGHNALNPAGRGKNYEPNSYDGPVQTDGALAAP…
B6264_07540_ARF78790.1	ARF78790.1	CP020567.1	Kitasatospora aureofaciens	typical catalase Group 6	MTTQDELRPTLTTAAGAPVADNQNTETAGVGGPVLIQDQLLFEKLAHFNRERIPERVVHARGAGAYGTFTVTADVTPWTRAAFLSRVGKQTEVFLRFSTVAGNLGAADAVRDPRGFALKFYTEEGNYDLVGNNTPVFFIRDAVKFPDFIHTQKRDPYTGSQEADNVWDFWGLSPEATHQVTWLFGDRGIPATYRHMDGFGSHTYQWQNEAGEHFWVKYHFKTDQGIRNLTQAEANRLAGEDPDSHQRDLRQAIERGEFPSWTVQVQIMPAADAATYRFNPFDLTKVWPHADYPPIEIGRLELNRNPDNVFAEVEQSVFTPANFVPGIGPSPDKMLQGRLFAYADAHRYRVGINADHLPVNRPHATEARTNSRDGYLYDGRHGRQKNYEPNSFGGPVQTG…
B6264_22995_ARF81394.1	ARF81394.1	CP020567.1	Kitasatospora aureofaciens	catalase-peroxidase Group 4	MSENHDATGVEASAGGCPVNHGRALHPTQGGGNRQWWPERLNLKILAKNPAVANPFGEAFDYAKAFNALDLPAVKRDIQEVLSTSQPWWPADFGYYGPFIIRMAWHSAGTYRISDGRGGADGGQQRFAPLNSWPDNASLDKARRLLWPVKKKYGRSISWADLIVLAGNVALEGMGFETFGFGGGRVDDWEPDEDVYWGPETTWLGDERYTGDRELESPLAAVQMGLIYVNPEGPNGNPDPIAAARDIRETFYRMAMNDEETVALIAGGHTFGKTHGAGPADNVGPDPEAAPMEQMGLGWKSGFGTGVGGDAITSGLEGIWTATPITWDNSFFETLFGYEWELTKSPAGAHQWKPKDGAGEGTVPDAHDPDKRHVPIMLTTDLSLRFDPVYEPISRRFLE…
B6E78_15330_ARD40571.1	ARD40571.1	CP020466.1	Edwardsiella ictaluri	catalase-peroxidase Group 3	MGNNNEFSGGKCPVMHGGMTSAGMASKDWWPNALNLDILHQHDTKTNPMGQQFNYREALKQLDVQALKDDLRALMTDSQPWWPADWGHYGGLMVRMAWHSAGSYRIADGRGGAGTGNQRFAPLNSWPDNVNLDKARRLLWPIKKKYGNKISWADLIVLAGTMAYESMGLKTFGFAFGREDIWHPEIDTYWGSEKEWLAPSGSEGSRYSGERDLENPLAAVMMGLIYVNPEGVDGHPDPQKTANDVRVTFARMAMNDEETVALTAGGHTVGKCHGNGSAANLGAAPEGADLQEQGLGWNNHTTRGIGRDTVSSGIEGAWTSKPTQWDNGYFEMLLGHEWTLTKSPAGAWQWVPIQIAEEDKPVDVEDPSIRLLPIMTDADMAMKVDPAYRQIAERFRQDP…
B6K69_16145_AWD23015.1	AWD23015.1	CP020470.1	Rhodobacter blasticus	catalase-peroxidase Group 3	MDGNDTRGSGKCPVMHGAMTSVGTNVMEWWPNALNLDILHQHDSKTNPLPGFNYREALKTLDVEALKRDVKALMTDSQDWWPADWGHYGGLMIRMAWHAAGSYRLADGRGGAGTGNQRFAPLNSWPDNANLDKARRLLWPIKKKYGNKISWADLIVLAGTMAYESMGLKTFGFGFGREDIWHPEKDVYWGSEKEWLAPSDSRYGDLSDPSTMENPLAAVQMGLIYVNPEGVNGQPDPMRTAAQVRETFARMAMDDEETAALTAGGHTVGKTHGNGSAANLGPSPEGADVTEQGLGWMNHTSRGIGRNTVTSGIEGAWTTHPTQWDNGYFDLLFGYEWELRKSPAGAWQWMPINIREEDMPVDVEDPSIRVMPIMTDADMAMKVDPAYRAICERFRADHA…
B7495_02175_ASD21052.1	ASD21052.1	CP021992.1	Cryobacterium sp. LW097	Mn-catalase Group 05	MYFHVQRLIHDIAQDEPDPAAANALQEGLGGQFGEMRTMMQYLFQSMNFRGPAAKPYRDLIQGIGTEEISHVELIGTTISRLVDGSPRYQGKVTDPLDKAGSGGAIPLEIALDQGNIHHYLVGAQGALPVDAVGNPWSGSYVYNSGNLVLDLLYNLMLESTGRLQKCRIYEMTANKTARSTIAYLIVRDQAHENAYAKALETLGVHWNTLLPIPKTNAEKFPEVKKLLDLNLHSKQYTFDLAGQSEAGKIFQGMSPSKDGTNLVADEQAPEGVPSVIAGERMEEFAPGLDPALMELIQATADMEMAEVDVSFGPAKAAPKTK
B7495_03605_ASD21292.1	ASD21292.1	CP021992.1	Cryobacterium sp. LW097	typical catalase Group 6	MTTLPPTTTQTGTPVPSDEHSLTAGADGVTALHDRYLVEKLAQFNRERIPERIVHAKGGGAHGVFEVTGDVSAYTRAALFQPGARTDTLQRFSSVAGEQGSPDTWRDVRGFSVKFYTQEGNYDIVGNNTPVFFIRDGIKFPDFIHSQKRLPGSGLRDADMQWDFWTLSPESAHQVTYLMGDRGLPRSWRTMPGFGSHTYQWINAAGERFWVKYHFTSNQGNIEMEGAEAELIAGADADYYRRDLYEAIDAGDFPSWDVHVQVMPYEEGKTYRFNPFDLTKVWPHADFPLIKVGTHTLNRNPGNFFAEIEQAAFSPANFVPGIAASPDKMLMARIFSYPDAQRYRVGTNYNQLPVNAPQSPVHNYSQDGAARYHFNDASAPVYAPNSLGGPVADPALAGD…
B7C62_02555_ARF71260.1	ARF71260.1	CP020563.1	Kitasatospora albolonga	catalase-peroxidase Group 4	MTENHESHVFDPVTPDSPETAIPEVPEAQASGCPVAHGRAPHPTQGGGNRQWWPDRLNLKILAKNPAVANPLGEEFDYAAAFQALDLPAVKRDIAEVLTTSQDWWPADFGNYGPLMIRMAWHSAGTYRISDGRGGAGAGQQRFAPLNSWPDNGNLDKARRLLWPVKKKYGQALSWADLLILTGNVALETMGFKTFGFAGGREDVWESEEDVYWGPETTWLDDERYTGDRELENPLGAVQMGLIYVNPEGPNGNPDPIAAARDIRETFRRMAMNDEETVALIAGGHTFGKTHGAGPAESVGADPEGAPLEEQGLGWRSSYKSGKGGDAITSGLEVTWTSTPTKWGNEFFHNLFAYEYELTKSPAGAHQWVAKDAEATIPDAHDASKKHKPQMLTTDLSLR…
B7C62_24865_ARF75112.1	ARF75112.1	CP020563.1	Kitasatospora albolonga	typical catalase Group 6	MTQGPLTTEAGAPVADNQNSETAGAGGPVLVQDQALLEKLAHFNRERIPERVVHARGAGAYGTFTVTRDVTRWTRAKFLSEVGKQTETFLRFSTVAGNLGSADAVRDPRGFALKFYTEEGNYDLVGNNTPVFFIKDAIKFPDFIHTQKRDPYTGSQEADNVWDFWGLSPESTHQVTWLFGDRGIPATLRHMNGYGSHTFQWNNEAGEVFWVKYHFKTDQGIKNLTQAEANKLAGEDPDSHQRDLREAIERGDFPSWTVQVQIMPAADAATYRFNPFDLTKVWPHADYPPIEIGKLELNRNPENVFAEVEQSIFSPAHFVPGIGPSPDKMLQGRLFAYGDAHRYRVGINADHLPVNRPHATEARTNSRDGFLYDGRHKGARNYEPNSFGGPSQTDRPLWQ…
B7C62_27005_ARF75497.1	ARF75497.1	CP020563.1	Kitasatospora albolonga	typical catalase Group 6	MTDTSRKPTTSDSGAPVESDEHSLTVGPGGPILLQDSYLIEQMAQFNRERIPERQPHAKGSGAFGKFEVTQDVSAYTKAALFQPGTTTDLVVRFSTVAGERGSPDTWRDPRGFAVKFYTSEGNYDMVGNNTPVFFVKDPMKFQHFIRSQKRRADNNLRDHDMQWDFWTLSPESAHQVTWLMGDRGIPRTWRHMNGYTSHTYMWINAEGRRFWVKYHFKTDQGIETFTQHEADQMAAADTDYHTRDLFEHIRDGDFPSWTLKVQVMPYEDAKDYRFNPFDLTKVWPHGDYPLIEVGRMTLDRNPTDNHAEIEQAAFQPNNLVPGIGPSPDRMLLARLFSYADAHRHRIGGNYQQLPVNAPVAPLHTYSKDGAMAYRKTTDPVYAPNSKGGPAADTERYGT…
B7C62_30545_ARF76130.1	ARF76130.1	CP020563.1	Kitasatospora albolonga	typical catalase Group 6	MAKRVLTTESGAPVADNQNSATAGVGGPILLQDQHLLEKLARFNRERIPERVVHARGSGAYGYFEVTDDVTGFTSADFLSEVGKRTETFLRFSTVADSLGGADAVRDPRGFALKFYTNEGNYDLVGNNTPVFFIKDPIKFPDFIHSQKRDPFTGRQEPDNVWDFWAHAPEATHQITWLMGDRGIPASYRHMNGYGSHTYQWTNAEGEAFFVKYHFKTNQGVRSLSAEQAAELVGRDANSHQTDLLQAIERGVNPSWTLHVQVMPAAEAADYRFNPFDLTKVWPHADYPLQRVGRLVLDRNPDNVFAEVEQAAFSPNNFVPGIGPSPDKMLQGRLFAYADAHRYRLGVNHTQLPVNAPKAAQADNYGRDGLHATRYGSRHDKNYEPNSYAGPAQTGSALG…
B7P19_08990_AUM03316.1	AUM03316.1	CP020817.1	Enterobacter sp. Crenshaw	typical catalase Group 5	MSNKDKTHQSPIHGTEESQPGMDSLAPADGSHRPSPGPSAPGEQPTAPGSMKSPETGNEKLKSLEPHRKGGEGFALTTNQGVRIADDQNSLRAGARGPTLLEDFILREKITHFDHERIPERIVHARGSAAHGYFQPYKSLKAITKADFLSDPDKITPVFVRFSTVQGGAGSADTVRDIRGFATKFYTEEGIFDLVGNNTPVFFIQDAHKFPDFVHAVKPEPHWAIPQGQSAHDTFWDYVSLQPETLHNVMWAMSDRGIPRSYRTMEGFGIHTFRLINAEGKATFVRFHWKPVAGKASLVWDEAQKLTGRDPDFHRRELWESIEAGDFPEYELGLQLIPEEDEFKFDFDLLDPTKLIPEELVPVQLVGKMVLNRNPDNFFAENEQAAFHPGHIVPGLDFT…
B7P19_10965_AUM03686.1	AUM03686.1	CP020817.1	Enterobacter sp. Crenshaw	Mn-catalase Group 03	MFRHVKQLQYTVRVAEPNPGLANLLLEQFGGPQGELAAACRYFTQGLSDDDPGRKDMLMDIATEELSHLEIIGTLVGMLNKGAKGALAEGVENEAELYRSMTENGNDSHITSLLYGGGTPLTNSAGVRWTAAYVDTIGEPTADLRSNVAAEARAKIIYERLINVTDDPGVKDALAFLMTREAAHQLSFEKALQSIRNNFPPGKLPPIEEFTNKYYNMSEGGEVRGSWNSDKHFDYVESPQPAVDGGDGSASVTLTTEQATLVKAMSARTKSDPHSDPLTGAELGAGKTKP
B7P19_21725_AUM05682.1	AUM05682.1	CP020817.1	Enterobacter sp. Crenshaw	catalase-peroxidase Group 4	MSTSDETNKAASVGKCPFHQGGVDHSAGAGTGSRDWWPKQLRIDLLNQHSNRSNPLGEDFDYRKEFSKLDYSALKGDLKALLTDSQPWWPADWGSYAGLFIRMAWHGAGTYRSVDGRGGAGRGQQRFAPLNSWPDNVSLDKARRLLWPIKQKYGQKISWADLFILAGNVALENSGFRTFGFGAGREDVWEPDLDVNWGDEKAWLTHRDPEALAKRPLAATEMGLIYVNPEGPNASGEPLSAAAAIRATFGNMGMNDEETVALIAGGHTLGKTHGAGEATHVGTDPEASPIEAQGLGWASTHGTGIGADAITSGLEVIWSQTPTQWSNYFFENLFKYEWVQTRSPAGAIQFEAVDAPEIMPDPFDPSKKRKPTMLVTDLTLRFDPEFEKISRRFLNDPQA…
B8281_11995_ARK05342.1	ARK05342.1	CP020857.1	Cellulosimicrobium sp. TH-20	Mn-catalase Group 10	MFFHRQELQHQATPDRPDAVYARKLQEVLGGQYGEITVAMQYGFQSWNAHIPGKYRDLLYGIGAEEFGHVEMLATMIAQLLEKAPVGAVEGAVQNDPTVAAIIGGTDPQHAIVAGAGARPVDSNGNPWSAGYVTASGNLLADFTANANAEMQGRVQVARLYHMTDDAGVKDLLAFLLARDTMHQNQWLAAAQELRDEGVEELPVPSTFPLSKEDRDVSYQYINFSDGEHASEGRWASGPTPDGKGEFTYVAEPPAGVPMPPPTTPDERFHGTTGKPSTLEKAKGAVKDALHKD
B8281_14340_ARK05733.1	ARK05733.1	CP020857.1	Cellulosimicrobium sp. TH-20	typical catalase Group 6	MTAPFTTTNAGAPVASDAHSQSVGADGPIVLHDHYLVEKLAQFNRERVPERVVHAKGGGAFGTFTVTQDVSAYTRAALFQPGTTTEMLARFSSVAGEQGSPDTWRDPRGFALKFYTTEGNYDLVGNNTPVFFLRDGIKFPDFIRSQKRLPGSNLRDNDMQWDFWSLSPESAHQVTWLMGDRGLPSSWRHMDGFGSHTYQWINAAGERFWVKYHFKTQQGIKNLTADEASQLAGSDSDHHIRDLYEHIEGGDFPRWTLSVQVMPYEDAKTYRFNPFDLTKVWPHADYPLIEVGVMELNRNPENYFAQIEQATFAPSNFVPGIATSPDKMLLARIFSYADAHRYRVGTNHAQLPVNAPHAAAEAGHSYAKDGSMRYSFSSATTPVYAPNSQGGAHADPARA…
B8P98_13445_ASV20218.1	ASV20218.1	CP022823.1	Klebsiella quasivariicola	catalase-peroxidase Group 4	MSTSNDPSNNASAGKCPFHAETPKQSAGSGTANRDWWPNQLRVDLLNQHSSRSNPLGEDFNYREEFKKLDYSALKADLRALLTDSQEWWPADWGSYIGLFIRMAWHGAGTYRTVDGRGGAGRGQQRFAPLNSWPDNVSLDKARRLLWPVKQKYGQKISWADLYMLAGNVALENAGFRTFGFGAGREDVWEPDLDVDWGDEKEWLAHRHPESLAKQAIGATEMGLIYVNPEGPNASGEPLSAAAAIRATFGNMAMDDEEIVALIAGGHTLGKTHGAAETSHVGAEPEAAPLEAQGLGWHSSYGSGAGADAITSGLEVVWTQTPTQWSNYFFENLFKYEWVQTRSPAGAIQFEAKDAPEIIPDPFNPEKKRKPTMLVTDLTLRFDPEFEKISRRFLNDPQA…
B8P98_16160_ASV20713.1	ASV20713.1	CP022823.1	Klebsiella quasivariicola	typical catalase Group 5	MSDKHPNPHHQQAPVHDSEEAQPGLDSLAPDDREWRPTPKPTAPGAEPTAPGSLKAPETHSSKLDALEPQRKGGEDFPLTTNQGVRIADDQNSLRAGTRGPTLLEDFILREKITHFDHERIPERIVHARGSAAHGYFQPYKSLAALTKADFLSAADKVTPVFVRFSTVQGGAGSADTVRDIRGFATKFYTDEGIFDLVGNNTPVFFIQDAIKFPDFVHAVKPEPHWAIPQGQSAHDTFWDYVSLQPETLHNVMWAMSDRGIPRSYRTMEGFGIHTFRLINAEGKATFVRFHWKPVAGKASLVWDEAQKLTGRDPDFHRRELWEAIEAGDYPEFELGLQLIPEENEFDFDFDLLDPTKLIPEALVPVQRVGKMVLNRNPDNFFAENEQAAFHPGHIVPGI…
B8P98_16605_ASV20794.1	ASV20794.1	CP022823.1	Klebsiella quasivariicola	Mn-catalase Group 03	MFRHVKQLQYTVRVAEPNPGLANLLLEQFGGPQGELAAACRYFTQGLSDDDPGRKDMLMDIATEELSHLEIIGTLVGMLNKGAKGALAEGTESEAELYRSLTANGNDSHITSLLYGGGTPLTNSAGVPWTAAYVDTIGEPTADLRSNVAAEARAKIVYERLINVTDDPGVKDALAFLMTREAAHQLSFEKAQQSIRNHFPPGKLPPISEYANTYYNMSEGGEVRGSWNSDKHFDYVKDPQPAVDGGDGSASVSLTPEQEALCKAMLKRTQSDPQDDPLTGAELGAGKQNTSSSAK
B9D02_07445_AWP34592.1	AWP34592.1	CP020820.1	Pantoea vagans	catalase-peroxidase Group 4	MVEADREAPEGKCPFHAGKPPQSNQAPGGGTTNRDWWPNQLRVDLLNQHSSRSNPLDESFDYRKEFAKLDYSALKADIKGLLTESQSWWPADWGSYIGLFIRMAWHSAGTYRSVDGRGGSGRGQQRFAPLNSWPDNVSLDKARRLLWPIKQKYGQKISWADLYILAGNVALENSGFRTFGFGAGRDDVWEPDMDVNWGEEAAWLEHRHPESLAQSPLGATEMGLIYVNPEGPEHSGDPASAAPAIRATFGNMGMNDEEIVALIAGGHTLGKTHGAAPASHVGVDPETAPIEAQGLGWVNSHGTGVGADAITSGLEVIWSQTPTQWSNYFFENLFKYEWVQTRSPAGAIQFEAADAPEIIPDAFDSTKKHKPTMLVTDLTLRFDPEFEKISRRFHNDPQA…
B9D02_10775_AWP33051.1	AWP33051.1	CP020820.1	Pantoea vagans	Mn-catalase Group 09	MFHHSSKLQFPVRVEKPDPEFAMLLQQAIGGVEGEIRVAMQYFFQAMGARGDARIRDLLISTATEELSHIEMLGYAVALNLEGAPLSYQEASAKDPVVNAILGGMNPRHILSSGLAAMPVNANGMPFDMSHIYASGNVAADMLANVTAEATGRVLATRLYNMTEDKGMKDFLSFLIARDTMHQQQWLAVIEEMGGLNASLPIPNSFPQEHEAQEHAYYCLNTSLDKPLPEGRWSSGPAYDGHGQFSAKQQPDILGDEPVLGNARPGSGAQSEQIDGVTPPKP
B9D02_10800_AWP33056.1	AWP33056.1	CP020820.1	Pantoea vagans	typical catalase Group 5	MSKETEKKPLSEHAPTTGPESSEPGLGSLAPKDGSHQPPAEPTPPGKQPTAPGSLKAPQTHSAKLDQLEASRKNGTHQALTTNQGTRIANDQSSLLAGSRGPTLLEDFILREKITHFDHERIPERIVHARGSAAHGYFQPYRSLKDLTKAQFLSDPEQTTPVFVRFSTVQGGAGSADTVRDIRGFAAKFYTEEGVFDLVGNNTPVFFIQDAHKFPDFVHAVKPEPHNEIPQGQSAHDTFWDYVSLQPETMHNVIWAMSDRGIPRSYRTMEGFGIHTFRLINAEGKATFVRFHWKPVAGKASLLWDESQKLTGRDPDFHRRDLWEAIEAGDFPEYELGLQLIPEEDEFKFDFDILDATKLIPEALVPVEIVGKMVLNRNPDNFFAETEQVAFHPGHIVPG…
B9G99_08850_ARS52975.1	ARS52975.1	CP021323.1	Kushneria konosiri	catalase-peroxidase Group 1	MSEEIKITGKCPFAGDSVGGAAGSAPTTDHWWPNRLKVELLHQDPREANPQDEDFNYAEAFSQLDLAEVKKDIKALLTSSQDWWPSDYGNYGPQMIRMAWHSAGTYRIADGRGGAGEAMQRFAPINSWWDNGNVDKSRRLLWPIKQKYGAALSWADLIVLTGNCSLEIMGFPTFGFAGGRIDAWEPDNLTYWGPESWYGKKIEDAPRGPFEGHPDQMVNRDLRWTGEAGDENYDLEAPLAASNSNLIYVDPEGSAKKGIPEDSAADIRITFGRMAMNDEETVALIAGGHAFGKSHGMTPPDQIGFAPEGAPMEAQGLGWHNPRGKGNAEDTMTNGIEGSWTQNPIQWDNSYLENLFNFEWEQTRSPAGALQWTPVDKNAPRTPDAHLEGVDHPLMMMTS…
B9G99_12975_ARS53658.1	ARS53658.1	CP021323.1	Kushneria konosiri	typical catalase Group 7	MTDSAPIHYTTANGAPVPNDDASITAGRNGPLTFDNWRLFEKLAHFNREQIPERVVHARGSAAFGTFRLTRDLSDLTIADFLRGVDTETPVALRFSTVAGGQDSADNIRDVRGFAVKFYTREGNFDLVGNNTPVFFIREPSKFPDFIHTQKKDPRTNLPSQQNQWEFWANHPQSFHQVTILKSDRGMPYSYRTMHGFGSHTLSLYNDAGERVWVKWHFKTNQGIRNMTPEEAQALPVNHHQADLFSHIERGDFPSWAVKLQVMTEAQARDYHINPFDLTKVWPQSDFPLMEIGQLELNRNPDNYFAEVEQLAFSPSNFVPGVSASPDRVLQSRLWSYADAHRYRLTVNYQQIPVNQPRCPVHHYQRDGLMAGTQRESGEGGQYSRTNFYPNDRVAQGAP…
B9G99_12980_ARS53659.1	ARS53659.1	CP021323.1	Kushneria konosiri	typical catalase Group 5	MADNPYSASNTDGPHDTDVKTSDQSKNDNLEPFRNDAEGHDLRTNNGVRIADNHNSLKAGERGPTLMEDFIFREKMNHFDHERIPERIVHARGAAAHGVFEAYPEAEQYSKAAVFRAGQQTPTFVRFSTVQGSRGSNDTVRDVRGFATKFYTEEGNWDLVGNDMPVFFIQDAIKFPDFVHAVKPEPHNEIPQGQSAHDTFWDFVSLMPESAHMVLWTMSDRAFPRSYRSMEGFGVHTFRLVDKQGKARFVKFHWKPLAGTYSFIWDEAQLLWGRDPDFNRREMATDISNGDYLEWELGVQIIEEEDEHRFDFDILDATKLIPEEQVPVTPLGKMTLNRNPDNYFAETEQVAFNPGHIVPGIDFTNDPLLQGRLFSYLDTQMLRLGGPNFKEIPINRPVT…
B9H00_02020_ART61998.1	ART61998.1	CP021358.1	Kushneria marisflavi	typical catalase Group 5	MANNPYSASNTDGPHDTDFKTSDQSKNENLEQFRNDAEGHDLRTNNGVRIADNHNSLKAGERGPTLMEDFIFREKMNHFDHERIPERIVHARGAAAHGVFEAYPEAERYSKAAVFKAGQQTPTFVRFSTVQGSRGSNDTVRDVRGFATKFYTEEGNWDLVGNDMPIFFIQDAIKFPDFVHAVKPEPHNEIPQGQSAHDTFWDFVSLMPESAAMVLWTMSDRAFPRSYRSMEGFGIHTFRLVDKQGKSRFVKFHWKPLAGTYSFIWDEAQLLWGRDPDFNRREMATDISNGDYLEWELGVQIIEEEDEHKFDFDILDATKLIPEEQVPVTPLGKMTLNRNPDNYFAETEQVAFNPGHIVPGIDFTNDPLLQGRLFSYLDTQMLRLGGPNFKEIPINRPVT…
B9H00_02025_ART61999.1	ART61999.1	CP021358.1	Kushneria marisflavi	typical catalase Group 7	MTDPAPIYYTTANGAPVPNDDASITAGRNGPLTLDNWRLFEKLAHFNREQIPERVVHARGSAAFGTFRLTRDLSDLTIADFLRGADTETPVALRFSTVAGGQDSADNIRDVRGFAVKFYTHEGNFDLVGNNTPVFFIREPSKFPDFIHTQKKDPRTNLPSQQNQWEFWANHPQSFHQVTILKSDRGMPYSYRTMHGFGSHTLSLYNDAGQRVWVKWHFKTNQGIRNMTPEEAQSLPVNHHQADLFNHIERGDFPSWTVKLQVMTEEQARGYRINPFDLTKVWSQADFPLIEIGQLELNRNPDNYFAEVEQLAFSPSNFVPGVSASPDRVLQSRLWSYADAHRYRLTVNYQQIPVNQPRCPVRNYQRDGFMAGTRRDEGEGGQYSRTNFYPNDRMSQGAP…
B9H00_06005_ART62658.1	ART62658.1	CP021358.1	Kushneria marisflavi	catalase-peroxidase Group 1	MSEEIKITGKCPFAGNSVGGAAGSEPTTDHWWPNRLKVELLHQDPREANPHDEGFNYAEAFNQLDLAEVKKDIKALLTSSQDWWPSDYGNYGPQMIRMAWHSAGTYRIADGRGGAGEAMQRFAPINSWWDNGNVDKSRRLLWPIKQKYGAALSWADLIVLTGNCSLEIMGFPTFGFAGGRIDAWEPDNLTYWGPESWYGKKIEDAPHGPFEGHPDQMVNRDLRWTGEAGDERYDLEAPLAASNSNLIYVDPEGSAKKGVPEDSAADIRITFGRMAMNDEETVALIAGGHAFGKSHGMTPPDQIGFAPEGAPMEAQGLGWHNPRGKGNAEDTMTNGIEGSWTQNPIQWDNSYLENLFNFEWEQTRSPAGALQWTPVDKNAPRTPDAHLEGVDHPLMMMTS…
B9H02_00655_ARM31819.1	ARM31819.1	CP020873.1	Prosthecochloris sp. HL-130-GSB	catalase-peroxidase Group 3	MQEQSKCPVTGHVGNPAAGGSGRSNRDWWPNQLNLDMLHQHSSLSNPLDESFDYAEAFNTLDLDAVKKDLYALMTDSQEWWPADYGHYGGLFIRMAWHSAGTYRTGDGRGGGGTGNQRFAPLNSWPDNANLDKARRLLWPIKQKYGKKISWADLMILAGNCALESMGFKTFGFGGGREDIWEPEEDIYWGKEVEWLGDNRYSGERDLENPLAAVQMGLIYVNPEGPDGKPDPVLAGKDIRETFARMAMNDEETVALVAGGHTFGKCHGVGDPDLLGPEPEAAPIEEQGLGWKSGYGSGKGDETMTSGLEGAWTPDPIHWDMGYLGMLFKYEWELTKSPAGAWQWKPKDVAEEDLAPAAHDPSKKVPTMMTTADLAMRMDPIYGPISKRFYEHPAEFADA…
B9N43_08445_QDX81267.1	QDX81267.1	CP020914.1	Denitratisoma sp. DHT3	typical catalase Group 7	MSDKQKLTTAAGCPVVDNQNTMTAGPRGPALLQDVWLLEKLAHFDREVIPERRMHAKGSGAYGTFTVTHDITKYTRAKIFSQIGKKTELFARFTTVAGERGAADAERDIRGFAVKFYTEEGNWDLVGNNTPVFFLRDPLKFPDLNHAVKRDPRTNMRSARNNWDFWTSLPEALHQITIVMSDRGIPASYRTMHGFGSHTFSFINAQNERFWVKFHLKSQQGIKNLSDAEAESIVGKDRESHQRDLYEAVERGDFPKWTLKVQIMPEKDASKVPYHPFDLTKVWPHKDYPLIDVGVMELNRNPENFFAEVEQSAFNPAAVVPGIGFSPDKMLQARLFSYGDAQRYRLGVNHHQIPVNAPRCPVHSYHRDGQMRTDGNHGGTLGYEPNSYGEWREQPDYRE…
B9S66_07410_AWL32022.1	AWL32022.1	CP029338.1	Streptomyces sp. SM17	typical catalase Group 5	MAQNKSPDPKQRQRAEALAPDPCGGPLTTDQGVTVEHTDDSLRAGERGPTLLEDFHFREKITRFDHERIPERVVHARGAGAYGYFEPYASCAEFTRAAFLQDPAVRTPVFVRFSTVQGPRGSADTVRDVRGFATKFYTSEGNYDLVGNNFPVFFIQDGIKFPDFVHAVKMEPHNEIPTGASAHDTLWDFVSLQPETLHTIMWLMSDRAIPRSYRMMQGFGVHTFRFVDAAGKGTFVKFHWKPKLGVHSLVWDEAQEVMGRDPDFNRRDLWDTIEAGQYPEWELGVQLVPEADEHKFDFDLLDATKIIPEEQVPVRPIGRMVLDRNPDNFFAETEQIAFCTANVVPGIDFTNDPLLQARNFSYLDTQLIRLGGPNFAHIPVNRPVVDVRNNQRDGYHQEE…
B9S66_09235_AWL32346.1	AWL32346.1	CP029338.1	Streptomyces sp. SM17	typical catalase Group 6	MSDAPQQAPYTTDNSGIPVESDEHSLTVGRDGPILLQDHYLIEKMAQFNRERVPERVVHAKGSGAYGFFEVTNDVSQFTKADLFQPGKRTPMLARFSTVAGEQGSPDTWRDPRGFALKFYTELGNYDMVGNNTPVFFVRDPMKFQDFIRSQKRRPDNALRDHDMQWDFWTLSPESAHMVTWLMGDRGIPRTYRHMDGFSSHTYMWVNEGGERFWVKYRFKTDQGIEFYTQEEADRVAGEDADIHRRDLFDAIRRGDHPTWTMYVQIMPFEDAADYRFNPFDLTKVWPYGDYPLIEVGRMTLDENPEDWFIHIEQASFEPSNLVPGIGPSPDKMLLGRLFSYPDTHRYRIGPNYTQLPPNRPRSPIASYAKDGPMRYEPARVNAVYAPNSYGGPDADTAR…
B9S66_20020_AWL34321.1	AWL34321.1	CP029338.1	Streptomyces sp. SM17	typical catalase Group 3	MTEPANKDRPYLTNRQGHPVYDNQNQRTVGARGPATLENYQFLEKISHFDRERIPERVVHARGVTTFGFFEAYGKWGDEPISRYTRAKLFQEAGKRTDVAVRFSTVIGGRDSSEAARDPRGFAVKFYTEDGNWDLVGNNLGVFFIRDAIKFPDVIHSLKPDPVSHEQKPARIFDFMSQTPEAMHMLVNLFSPRGIPADYRHMQGFGVNTYKWVDAEGGTVLVKYHWVPKQGVASMTEEDAANVQADDLGHATKDLYEAIGRGDYPEWELRVQMMSDDDHPELDFDPLDDTKTWPEQDFPPRPVGRMVLDRVPGNYFAENEQAAFGTGVLVDGLDFSDDKMLVGRTFSYSDTQRYRVGPNYLQLPVNQPKAPVATNQRDGQMAYENGPDGENPEVNYEPS…
B9S66_21800_AWL34641.1	AWL34641.1	CP029338.1	Streptomyces sp. SM17	typical catalase Group 6	MTQGPLTTEAGAPVADNQNSETAGVGGPVLVQDQLLLEKLAHFNRERIPERVVHARGAGAYGTFTVTADVTQWTRASFLSEVGKQTETFLRFSTVAGNLGAADAVRDPRGFALKFYTEDGNYDLVGNNTPVFFIKDAIKFPDFIHTQKRDPYTGSQEADNVWDFWGLSPESTHQVTWLFGDRGIPASYRHMNGYGSHTYQWNNEAGEVFWVKYHFKTDQGIKNLTTSEAAETSGLDPDSHQRDLREAIERGDFPSWTVQVQIMPAADAATYRFNPFDLTKVWPHEDYPPIEIGKLELNRNPENIFAEVEQSIFSPAHFVPGIGPSPDKMLQGRLFSYGDAHRYRVGINADHLPVNRPHATEARTNSRDGYLYDGRHKGAKNYEPNSFGGPAETGRALWQ…
B9S66_26640_AWL35531.1	AWL35531.1	CP029338.1	Streptomyces sp. SM17	typical catalase Group 6	MSKRVLTTESGAPVADNQNSASAGVGGPLLLQDQHLLEKLARFNRERIPERVVHARGSGAYGHFTVTDDVSDLTSAAFLNTVGKRTELFTRFSTVADNLGGADAVRDPRGFAVKFYTEEGNYDLVGNNTPVFFIKDPLKFPDFIHSQKRDPFTGKQEPDNVWDFWAHAPEATHQVTWLMGDRGIPASYRHMNGYGSHTYQWTNAAGDAFFVKYHFKTNQGIRSLSAEQGQELAGKDANSHQTDLLQAIERGVHPSWTLYVQVMPAAEADGYRFNPFDLTKVWPHADYPLRRVGRLVLDRNPDNVFAEVEQAAFSPNNFVPGIGPSPDKMLQGRLFAYADAHRYRLGVNHTQLAVNAPRATTADNYGRDGLMAANAQPRGEKNYEPNSYGGPAETGTPLS…
B9T62_03510_ASA19951.1	ASA19951.1	CP021780.1	Paenibacillus donghaensis	Mn-catalase Group 07	MFKRMDEILIEIPKVEKPDANAAAAIQELLGGKFGEMSTLNNYLYQSFNFRSKEKLKPFYDLVMSITAEELGHVELVSHAINHCLRGSTEYKKPDSTPLEAAKDARLSYHFLAGAQGAMPFDSMGNPWTGANVFNSGNLVEDLLHNFFLECGARTHKMKVYEMTDHPAARAVVGFLLVRGGVHVVAYAKALEIATGVNVTKLVPIPSLNNKSFTEAKKYEDKGVHTKLYTYSDKDFTSIGQIWKGTHPEDNQPLEVIEGTPKGYPIPEAPAVEEEFAPGISEEEFKEIAKRLKMAGNIKE
BA022_00440_ASI67177.1	ASI67177.1	CP016278.1	Diaphorobacter polyhydroxybutyrativorans	typical catalase Group 5	MPRTPATKQPLPARQAAAHADSYRGHAGELQQQAAGQHPVLTTQQGIAVPDNQNTLRPSPHGPALLEDFILREKITHFDHERIPERVVHARGSAAHGFFELTHSLADYTTARVLTEVGARTPVFTRFSTVAGGAGSVDTPRDVRGFAVKFYTPEGNWDLVGNNIPVFFIQDAMKFPDLVHAVKMEPDRAFPQAASAHDTFWDFISLMPESMHMVMWIMSDRTIPRSLRMIEGFGVHSFRLVNAAGESTFVKFHWRPKLGIQSTVWDEAMKLQAADNDFHRRDLFEAIEAGDYPEWELSVQLFTEEEAGTFPFDHLDPTKLIPEELVPLRPIGRMVLNRWPDNFFAETEQVAFCPANLPPGIDFSNDPLLQGRLFSYLDTQLLRLGGPNFVQIPINAPKC…
BA022_05300_ASI68046.1	ASI68046.1	CP016278.1	Diaphorobacter polyhydroxybutyrativorans	typical catalase Group 7	MTHRLTTAAGAPVANNQDSLTAGPRGPMLLQDLWHLEKLAHFHREVIPERRMHAKGSGAFGTFTVTGDITRYTRAKVFSAIGKQTELFARFSTVAGERGAADAERDIRGFAVKMYTEEGNWDLVGNNTPVFFFRDPLKFPDLNKAVKRDPYTNMRSAESNWDFWTGLPEALHQITIVMSDRGIPRGYRHMHGFGSHTYSLINQAGERHYVKFHWVCQQGIENLSDQEAAAVVAHDRESSQRDLLQAIDRGDFPKWKLCVQIMTEEQAQTYRFHPFDLTKVWSKKDFPLIEVGVMELNRNPDNYYADVEQASFAPSNLVPGIGPSPDRMLQSRLFSYADAARYRLGVNHHQIPVNAARCPVNIYHRDGAMRVDGNAGRTIAYEPNTQGAWQEQPAYAEPV…
BA177_13820_ANO52129.1	ANO52129.1	CP016268.1	Woeseia oceani	catalase-peroxidase Group 2	MRKQALYILVSLAVVLTPLIATTSAYAEGEPKSNQFWWPDNLNLAPLRQHAAASNPLGDDFDYAEAFNNLDIDAVKADIEALMTTSQDWWPADYGHYGPFFIRMAWHSAGTYRTIDGRGGAGGGQQRFEPLNSWPDNANLDKARRLLWPVKQKYGRSISWADLMVLTGNVALESMGFKTFGFAGGRQDDWEADLVYWGPENEFLADERYSGERELQKPLGAVQMGLIYVNPEGPNGKPDPLLAAKDIRETFGRMAMNDEETVALIAGGHTFGKAHGAAAPADCVDVEPAAAGVEMQGIGWKNKCGSGKAGDTITSGLEGAWSANPTAWTTQYLDNLFGFNWVMSKSPAGATQWVPDTASAANMVPDAFDASKRHAPIMFTTDLSLKFDPSYRKIAKRFQ…
BA20089_00585_ATO42188.1	ATO42188.1	CP017696.1	Bifidobacterium asteroides DSM 20089	typical catalase Group 6	MNDKLTTNEGQPWADNNHSQTAGTRGPILMQDYQLLEKLAHFNRERIPERVVHAKGAGAKGSFTLTKDMSAYTKADVFNGAGKTTPILLRFSQVAGESGYPDTLRDVRGFALRFYTQEGNYDVVGNNTPVFFVNDPLKFPDFIHSQKRDPATHLRSQEMQWDFWSHSPESVHQVTYLMGDRGNPASYRNMNGYGSHTFKWVNAKGEQFWVKYHFLSEQGVKNMTDETAAKVASEDTDFLLHDLYDAIDRGDYPKWKVCVQILPYQEGLDYKDDIFDVTKVVSKKDYPRIEIGEFVLDTNPTNYFDDVEEAAFSPANFVPGIEPSPDKLLQGRLFGYKDAERYRLGANYEQLPINRPVNEVHNYERDGFMSQGQDGSVNYEPNSKGGPVEDNDARMHGDA…
BA6348_14905_QAV13938.1	QAV13938.1	CP026363.1	Brevibacillus agri	typical catalase Group 3	MEESKNSTQGRSTEEELLTNRQGHPITDNQNMRTVGNRGPTVLENYDFLEKITHFDRERIPERVVHGRGAGAHGYFEAYGTVGDEPVAKYTRAKLFAERGKKTPVFVRFSTVIHGTHSPETLRDPRGFAVKFYTEDGNWDLVGNNLKVFFIRDAMKFPDLVHAFKPDPVTNIQDVERIFDFISNTPEAMHMITFLFSPWGIPANYRQMQGSGVNTYKWVNQKGEAVLVKYHWQPLAQGIKNLTQKEAEEIQGKNFNHATQDLYEAIERGDYPEWELCVQIMSDDEHPELDFDPLDPTKLWPEEQFPFLPVGKMVLNKNPENYFAEVEQVAFGTGVLVDGLDFSDDKLLQGRTFSYSDTQRYRVGANYLQLPINAPKKHVATNQEGGQMLYRVDRKQPHI…
BA6348_16100_QAV16080.1	QAV16080.1	CP026363.1	Brevibacillus agri	Mn-catalase Group 07	MFTRINRLAIELPEPEYGDANAAAAVQELLGGRFGEMSTLNNYLYQSFNFRGKRKLKPFYDLVASITAEEVGHVELVSNAINLCMKGITRPGDPDTTPLSNGLNKRNTYHFIASAQTALPGDSMGKSWTGDYVFTSGNLVLDLLHNFFLECGARTHKMRVYQMTDHPTARAMIGYLLVRGGVHIVAYAKALEIATGVDLTKMLPIPDLDNDQFDATHPYIAMGLNRKLFTFSYQDYQDIALIWRGPLPDGGTAEVIQGVPDGGPVPDLDELPEEFAPGVSREDFIEIAKRLQRSAGL
BA6348_17715_QAV14452.1	QAV14452.1	CP026363.1	Brevibacillus agri	Mn-catalase Group 01	MWIYEKKLQYPVRVSKCDVKMAKYLTEQYGGADGELAAALRYMNQRYTIPNKVIGLLTDIATEEFAHLEMIATMVYKLTKDATVEQLEEAGLGAHYANHDRALFYNNAAGVPWTATYIAAKGDPIADLYEDIAAEEKARATYQWLIDMTDDVDLQDSLKFLREREIVHSLRFREAVEILKEEQGRKTIF
BACOV975_04815_SCV11021.1	SCV11021.1	LT622246.1	Bacteroides ovatus V975	typical catalase Group 7	MEKKKLTAANGRPIADNQNSQTAGQRGPVMLQDPWLIEKLAHFDREVIPERRMHAKGSGAYGTFTVTHDITKYTRAAIFSKVGKQTECFVRFSTVAGERGAADAERDIRGFAMKFYTEEGNWDLVGNNTPVFFLRDPLKFPDLNHAIKRDPKTNMRSPNSNWDFWTLLPEALHQVTITMSPRGIPYSYRHMHGFGSHTYSFINAENQRIWVKFHLRTLQGIKNLTDQEAEAIVAKDRESHQRDLFESIEKGDYPKWLFQIQLMTEEEADNYRINPFDLTKVWPHKDFPLQDVGVLELNRNPENYFAEVEQAAFNPMNIVDGIGLSPDKMLQGRLFSYGDAQRYRLGVNAEQIPVNKPRCPFHAYHRDGAMRVDGNYGATKGYEPNSYGEWQDSPDMKEP…
BADSM9389_24560_BCG09786.1	BCG09786.1	AP023184.1	Buttiauxella agrestis DSM9389	typical catalase Group 5	MSTNDKHPLSHNAPIHDANESKPGMDSLAPEDGSHRPSAEPTPPGAQPTAAGSFKSPDTSNEKLKSLDVHRKDGENFPLTTNQGVRIADDQNSLRAGTRGPTLLEDFILREKITHFDHERIPERIVHARGSAAHGYFQPYKNLSDVTKADFLSDPDKITPVFVRFSTVQGGAGSADTVRDIRGFATKFYTEEGIFDLVGNNTPVFFIQDAHKFPDFVHAVKPEPHWAIPQGGSAHDTFWDYVSLQPETLHNVIWAMSDRGLPRSYRTMEGFGIHTFRMINAEGKATFVRFHWKPTAGKASLIWDESQKLTGRDPDFHRRDLWESIEAGDFPEYELGLQLIPEEDEFKYDFDLLDPTKLIPEELVPVHLVGKMTLNRNPDNFFAENEQAAFHPGHIVPGL…
BADSM9389_40610_BCG11340.1	BCG11340.1	AP023184.1	Buttiauxella agrestis DSM9389	catalase-peroxidase Group 4	MSTNENDHNKLSTDAGKCPFHQSGNDESAGAGTSTRDWWPKQLRVDLLNQHSNRSNPLGEDFDYRKEFSKLDYSALKGDLKALLTDSQPWWPADWGSYAGLFIRMAWHGAGTYRAVDGRGGAGRGQQRFAPLNSWPDNVSLDKARRLLWPIKKKYGQKISWADLYVLAGNVALENSGFRTFGFGAGREDVWEPDLDVNWGNEKAWLEHRDPEALAKRPLAATEMGLIYVNPEGPNASGEPLSAAAAIRATFGNMGMNDEETVALIAGGHTLGKTHGAAEATHVGVDPEAAPIESQGLGWTSSHGSGVGADAITSGLEVVWSQTPTQWSNYFFENLFKFEWVQTRSPAGAIQFEAVDAPEIIPDPFDPSKKRKPTMLVTDLTLRFDPEFEKISRRFLNDP…
BAU07_10650_ANN77501.1	ANN77501.1	CP016172.1	Bordetella flabilis	typical catalase Group 7	MTDKTTPPTLTHATGAPVADNVNIQTAGPRGPALLQDVWLIEKLAHFDREVIPERRMHAKGAGAHGTFTVTHDITRYTKARIFSEVGKQTPLFARFSTVAGERGAADAERDIRGFALKFYTEEGNWDVVGNNTPVFFFRDPLRFPDLNHAIKRDPRTGLRSAENNWDFWTLLPEALHQVTIVMSERGIPRTFRHMHGFGSHTYSFINAANERTWVKFHFRTQQGVENLTDAQAQELVGADRETHQRDLFESIERGDFPRWTLFIQVMTDAQAKAFRFNPFDLTKVWPKGEFPLIEVGYFELNRNPENFFAETEQAAFSPANIVPGVGYSPDKMLQARLFSYGDAQRYRLGVNFNHIPVNAPKCPFHSYHRDGAMRTDGNLGGTPSYWPNSKGVWTDQPQ…
BAU07_19655_ANN79034.1	ANN79034.1	CP016172.1	Bordetella flabilis	Mn-catalase Group 03	MFAHNKRLQYTVRVQETNPGLANLLLEQFGGPQGELAAAMRYFTQAIAEDDPGRKDMLIDIATEELSHLEVIGTLVAMLNKGAKGRLAEAVDSEAELYRAVNGPGNDSHVTQVLYGGGPALINSGGQLWTAGYIDSIGDPACDLRSNIAAEARAKIIYERLINVTDDPGVKEALGFLMTREVAHQQSFEKALYSMVPNFPPGKLPGDPRFANTYFNMSQGEGDTRGPWNSDENFEFVSDREEQCAVDGGDGLAMVNLSGEETQAMQALVSRTASDPQSNPETGADLGAGVSTTGKI
BAV0445_CAJ48050.1	CAJ48050.1	AM167904.1	Bordetella avium 197N	typical catalase Group 4	VYKTAISLGMAISATLCLPALAQEPTLTLDNGAPVGDNQNSQTAGPNGPVLLQDVQLLQKLQRFDRERIPERVVHARGTGAYGEFIAHEDLSDLTQAELFRKDIKTPVFVRFSSVVHGVHSPETLRDPRGFAVKFYTTQGNWDLVGNNFPTFFIRDAIKFPDMVHAFKTDPRTNLDDDRRRFDFFSFFPEATRTLTQLYANEGTPASYRHMDGNSVHAYKFVNAAGQTHYVKFNWRTRQGRKNLDPGEVQAMQGKDYSHMTRDLVEAIDRGDYPKWDLYIQVLKPEQLASFDFDPLDATKIWPDVPSRKIGEMVLNRNPENVFQETEQVAMAPSNLIPGIAPSEDRLLQGRLFAYADTQMYRLGATALSLPINRPHNAVLTRNQDGALNAGHTQGSVNY…
BAV3417_CAJ51027.1	CAJ51027.1	AM167904.1	Bordetella avium 197N	catalase-peroxidase Group 4	MCSPVPSWTQSWRNARGRFNFPRRESMSNEAKCPFNHTAGSGTTNQDWWPKRLRLELLSQHSAKTNPLDPDFDYAKAFNSLDLAAVKQDLAKLMTDSQDWWPADFGHYGPLFIRMAWHSAGTYRVGDGRGGAGRGQQRFAPLNSWPDNVSLDKARRLLWPIKKKYGNKISWADLFILTGNVALETMGFKTFGFGGGREDTWEPDQDVYWGDEKTWLGGDLRYGKNEAQPVADKAGHGKEHGRTDGGRNLENPLAAVQMGLIYVNPEGPDGNPDPQASAHDIRETFARMAMNDEETVALIAGGHTFGKTHGAGPADNVGPEPEAAELENQGLGWKNSFGTGKGSDTITSGLEVTWTSTPTKWSNNFFWNLFGYEWELTKSPAGAHQWIPKHGAGAGSVPD…
BAY15_1302_AOA71736.1	AOA71736.1	CP016294.1	Stenotrophomonas rhizophila	catalase-peroxidase Group 4	MKSEAKCPFNHALVGDATTNRDWWPNQLRVDLLNQHSSRSHPLAADFDYAKAFSQLDYAALKADLTALMTDSQDWWPADFGHYGGLFVRMAWHSAGTYRIGDGRGGGGRGQQRFAPLNSWPDNVSLDKARRLLWPIKQKYGQAISWADLLILTGNVALESMGFKTLGFAGGRPDTWEPDQDVYWGRETTWLGGDVRYAHGSEGVVEDHGVLVSDDDADGDIHSRNLENPLAAVQMGLIYVNPEGPDGNPDPVKAAIDIRDTFGRMAMDDEETVALIAGGHSFGKTHGAGPADNVDVEPEAAGLEHQGLGWANKFRSGKGGDTITSGLEVTWTRTPAQWSHDFFEILFGNEWELTKSPAGAHQWVAKNADAVIPDAHDPSKKHRPTMLTTDLSLRLDPAY…
BAY15_2764_AOA73198.1	AOA73198.1	CP016294.1	Stenotrophomonas rhizophila	typical catalase Group 5	MATSKPRTKSAPPADRRGEGDELHQQAGGGHPALTTNQGIPVADNQNSLRDTPRGPTLLEDFILREKITHFDHERIPERIVHARGSAAHGYFELTRSLEEFTRARVLTEVGVRTPVFTRFSTVAGGAGSVDTPRDVRGFAVKFYTPEGNWDLVGNNIPVFFIQDAIKFPDLIHAVKMEPDRAFPQAASAHDTFWDFVSLMPESMHMIMWAMSDRTIPRSLRTIEGFGIHSFRLLNDAGESTFVKFHWRPKLGVQSTVWDEAVKLQGADNDFHRRDLFEAITAGDFPEWELAVQLFTEEEAEAFPFDHLDSTKIIPESLVPLTVIGRMVLDRWPDNFFAETEQVAYCPANVPPGIDFSNDPLLQGRLFSYLDTQLSRLGGPNFHQIPVNAPKCPFANHQR…
BAY61_16735_ASR36379.1	ASR36379.1	CP016353.1	Prauserella marina	typical catalase Group 6	MTREHTNLTTTDAGIPVESDEHSLTVGPGGPILLQDSYLIEQMAQFNRERVPERQPHAKGSGAFGRFEVTDDVSAYTKAALFQPGTKTELVIRFSTVAGERGSPDTWRDPRGFAIKFYTSEGTYDMVGNNTPVFFVKDPLKFQHFIRSQKRRADNNLRDHDMQWDFWTLSPESAHQVTWLMGDRGIPRTWRHMNGYSSHTYLWINAAGERFWVKYHFKTDQGIEHFTQDEADQMASADTDYHTRDLFEAIERGEYPTWTLYMQIMPFDDAPGYRFNPFDLTKVWPHSDYPLIRVGRMTLDRNPTDYHTEIEQAAFEPNNLVPGIGPSPDRMLLGRLFSYADAHRYRIGPNYKQLPVNASTSPVNSYSKDGPMRYEKVSDPVYAPNSKGGPAADTERYGL…
BAY61_18280_ASR36624.1	ASR36624.1	CP016353.1	Prauserella marina	Mn-catalase Group 10	MFRHTKLLQFEAKPQRPDAAYARKLQELIGGAYGEMTVTMQYLFQGWNCRIEGKYKDLIMDTATEEIGHVEMLATMVARLLDGAPATETAEAADKDPVMAAVLGGMDPQQAIVAGGGALPNNSQGVPWNGGYIVASGNLLADFRANAAAEAQGRLQTARLYNMTDDPGVKEMLQFNLARDTVHQKQWLAAIEELEADGIEGPIAPSALFDVENSDHNNTVWHLSDGPDGAKGGWSADGDIEYLEAPKPLGGPATAPKPDPNLFGTYAPAQDASGTLKGKAKQAKNKLKDNGR
BAY61_22150_ASR37250.1	ASR37250.1	CP016353.1	Prauserella marina	catalase-peroxidase Group 4	MSDSPDAVVGEMNVEEAGGCPVAAGRFKHPTEGGTNNDWWPNQLNLKILRKHPAVADPMDEDFDYAAEFNTLDLDALAEDVDKVLTTSQEWWPADFGHYGPLMIRMAWHSAGTYRIQDGRGGAGAGMQRFAPLNSWPDNGNLDKARRLLWPVKKKYGRKISWADLMIFTGNRALETMGFKTFGFAGGRADVWEPDEDVYWGPERTWLGDERYSGDRDLENPLAAVQMGLIYVNPEGPNGNPDPLASARDIRETFRRMAMNDEETVALIAGGHTFGKTHGAADADVHVGAEPEGAPLEEQGLGWKNSFGSGKGRDAITSGLEVTWTSTPTRWGNGFFDNLFGYEWELTKSPAGAHQWQAKDGAGANTIPDPEDGSLNRPPTMLTTDLALRFDPVYEPISR…
BAY61_29335_ASR38426.1	ASR38426.1	CP016353.1	Prauserella marina	typical catalase Group 6	MTKPTTNNVGIPVASDDDSLTLGANGPILLQDHYLIEKNAQFNRERVPERVVHAKGGGAFGFLEVTEDVSQFTKAALFQPGTRTESLVRFSTVAGENGSPDTWRDPRGFAVKFYTSQGNYDIVGNNTPVFFIRDPIKFPDFIRSQKRRADNHLRDHNMQWDFWTQRTESAHQVTWLMGDRGLPRSWREMNGYGSHTYLWENAGGEKFWVKYHFKTDQGIGYLTQAEADRLAGEDADFHIRDLWTAIDKGNHPSWTLYVQVMPYQEAADYRFNPFDLTKVWPHGDYPLIKVGRWVLDRNPANYFAQIEQASFEPSNLVPGIGPSPDKMLQGRLFAYADAHRYRIGTNYTQLPVNAPKSEVNSYSKDGAMRFHNPADPVYAPNSYGGPHADAELASETASA…
BB31_23250_AJK56140.1	AJK56140.1	CP007219.1	Amycolatopsis lurida NRRL 2430	typical catalase Group 6	MTLPTTNNVGIPVASDNDSLTAGANGPILLQDHYLIEKNAQFNRERVPERVVHAKGGGAHGFLEVTEDVSQFTKAALFQPGVRTESLARFSSVAGENGSPDTWRDPRGFAVKFYTSEGNYDLVGNNTPVFFIRDPIKFPDFIHSQKRRADNHLRDHDIQWDFWTLRPESAHQVTWLMGDRGIPSNWREMDGFGSHTYLWENAGGEKFWVKYHFKTDQGIGYLAQADADRIAGEDSDYYIRDLFKNIKQGNHPSWTLYVQVMPYAEAADYRFNPFDLTKVWPKGDYPLIKVGRWVLDRNPANYFAEIEQAAFEPSNLVPGIGPSPDKMLQGRLFAYPDAHRYRIGANYTQLPVNAPKSPVNSYSRDGAMRYNNPGDPVYAPNSYGGPHANAEIAAETASG…
BB31_31170_AJK57586.1	AJK57586.1	CP007219.1	Amycolatopsis lurida NRRL 2430	Mn-catalase Group 10	MFRHTKSLQFEAKPEKPDALYARKLQELIGGAYGEMTVTMQYLFQGWNCRIEGKYKDLIMDTATEEIGHVEMLATMVARLLEGAPATMVAEAAKDPATAAILGGMDPQQAIISGGGATPSDSQGYPWNGRYVVASGNLLADFRANAAAEAQGRLQTARLYNMTDDPGVKAMLQFNLARDTVHQKQWLAAIEELKADGLESDIAPTALFDEENQEHNNTIWHLSDGPDGSKGGWSFGEDGIEYLMEPEPLGGPGTAPKPDPALYGTYAPLQDAVGTVKGKVKDAKKKATKSSKS
BB31_31810_AJK57705.1	AJK57705.1	CP007219.1	Amycolatopsis lurida NRRL 2430	catalase-peroxidase Group 4	MSDSPDAVIGEMNEESAGGCPVSSGRRNHPTEGAGNRDWWPNQLNLKILRKHSAASDPMDAGFDYAAEFKTLDLTELAKDVDAVLTTSQDWWPADFGHYGGFMIRMAWHSAGTYRIEDGRGGAGAGMQRFAPLNSWPDNGNLDKARRLLWPVKKKYGRKISWADLMIFTGNRALETMGFKTFGFAGGRADVWEPDEDVYWGPERTWLGDERYTGDRELENPLAAVQMGLIYVNPEGPNGNPDPLAAARDIRETFGRMAMNDEETVALIAGGHSFGKTHGAADPDKYVGPEPEGASIEEQGLGWKNTFGSGKGRDAITSGLEVTWTPTPTQWSNWFFHNLFEYDWELTKSPAGAHQWVPKDGKAKNTVPDPEDGKLNRAPGMLTTDLALRFDPVYEQISR…
BB31_33030_AJK57927.1	AJK57927.1	CP007219.1	Amycolatopsis lurida NRRL 2430	typical catalase Group 5	MAQHREDAKDEQLGGSRVDPGQSALTTQQGVRVDHTNDSLTAGVRGPTLLEDFHAREKITHFDHERIPERVVHARGAGAYGFFEAYDDALADYTVAEFLTSGEKIPVFVRFSTVAGSRGSADTVRDVRGFATKFYTRQGNYDLVGNNMPVFFIQDGIKFPDFVHAVKPEPRNEIPQAQSAHDTFWDFVSLQPESLHMVLWLMSDRALPRSYRMMQGFGVHTFRLVNADGEGTFVKFHWKPVLGTHSLVWDECQKIAGKDPDFNRRDLWDAIEAGQYPEWELGVQLVAEDSEHDFDFDLLDPTKIIPEEQVPVRAVGRMVLDRNPEDFFAETEQIAFHTANVVPGIDFTNDPLLQARNFSYLDTQLIRLGGPNFSQLPVNRPIAPVHTNQRDGHGQQNIH…
BB31_33875_AJK58062.1	AJK58062.1	CP007219.1	Amycolatopsis lurida NRRL 2430	typical catalase Group 5	MPPKRQREQSAPAKDESNARTGRSGEGQRGNHLTTAQGVRLPDTDHSLKAGPRGPSLMEDFHLREKITHFDHERIPERVVHARGAAAHGTFRAYGNAASVTKAGFLEKGRETPVFVRFSTVLGSRGSADTVRDVRGFAVKFYTAEGNFDLVGNNMPVFFIQDGIKFPDVIHAGKPHPDREIPQAQTAHDTFWDFVSLHTEATHHVMWAMSDRGIPRSYRTMEGFGVHTFRLVNAEGATSLVKFHWKPVAGVHSLVWEEAQIAAGADPDFHRRDMADGIDAGAPLEYELGLQVMPDSDDEMFEGIDLLDPTKIVPEELAEVQLVGKLTLDRNPTNYFAETEQVAFHTGNLVPGIEVTDDPLMQARLFSYLDTQLTRLGGPNFTQLPINCPHVAVNDNLRD…
BB31_39385_AJK59044.1	AJK59044.1	CP007219.1	Amycolatopsis lurida NRRL 2430	catalase-peroxidase Group 4	MSDTPEKGCPVAHDSVTAHGSESENPAIDSPTPKTGGRPRTNKDWWPNQLDLSVLHAHSPKADPLGENFSYAEEFAKLDVEALKRDIVEVLTTSQDWWPADFGHYGGLMIRMSWHAAGTYRIHDGRGGAGDGAQRFAPLNSWPDNANLDKARRLLWPVKEKYGQQISWADLLVLAGNVALESMGFKTFGFGFGRVDTWEPEEIFWGPEDTWLGDERYASDSEMVPDVGATEMGLIYVNPEGPRGSADPAAAAHFIRETFARMAMNDEETVALIAGGHTFGKTHGAGIADDHVGPEPEAAPIETQGLGWLSTHGSGKGADTITSGLEVTWTDKPTQWSNRFFEILFGYEWELTTSPGGAKQYVAKDAEAIIPDAHDPAKKHKPTMLTTDLALRVDPAYEK…
BB497_05615_AVI62222.1	AVI62222.1	CP016490.1	Halomonas sp. GFAJ-1	catalase-peroxidase Group 3	MSGKCPVMHGGNTSTGTSNKDWWPEGLNLDILHQQDRKSNPMDADFNYREEVRKLDFDALKKDVHALMTDSQEWWPADWGHYGGLMIRMAWHSAGTYRIADGRGGGGTGSQRFAPLNSWPDNVSLDKARRLLWPIKRKYGNKISWADLMILAGTVAYESMGLPSYGFSFGRADIWEPEKDIYWGDEKEWLAPSDERYGDVEKPDTMENPLAAVQMGLIYVNPEGVNGQPDPLKTAQQVRETFARMAMNDEETAALTAGGHTVGKCHGNGDAGALGAEPEASDVENQGFGWNNPHMDGQANKAVTSGIEGAWTTNPTQFDMGYFDLLFGYEWELRKSPAGAHQWEPIDIKEEDKPVDATDPSVRHNPIMTDADMAMKMDPTYRAICEKFMADPEYFKLTF…
BB497_08385_AVI62723.1	AVI62723.1	CP016490.1	Halomonas sp. GFAJ-1	typical catalase Group 6	MTSSKYTTNEAGIPVSSDEHSLSVGADGPIVMHDHYLMEQMAAFNREMIPDRQPHAKGSGAFGHFEVTQDVSKYTKAKFLQPGTKTDVLIRFSTVAGESGSPDTWRDPRGFSIKFYTDEGNFDMVGNNTPVFFVRDPMKFQHFIHSQKRRADNGLRDHDMQWDFWTLAPESAHQVAWLMGDRGVPATWRHMNGYSSHTYMWVNDEGERFWVKYHFKTDQGIKCMTQEQADQMAGSDADYHRRDLFEAIKRGDYPSWTLQMQIMPFEDAKTYRINPFDLTKVWPHDDYPLMEVGKLTLNRNPTDFHSEIEQAAFEPNNSVPGTGFSPDKMLLARVISYADAHRARLGVNYKHIPVNAPKCPVHSYSQGGAMRIKHSTDPVYTPNSKGGAKADPERFPEDA…
BB934_04620_ANY77605.1	ANY77605.1	CP016616.1	Microvirga ossetica	Mn-catalase Group 06	MFLRVDKLQIDLPAPKRQDPNAAAALQELLGGKYGEMSTLGNYMFQSFNFRSKSKLRPFYSLVAAITAEEIGHVELVSNGVAMLNNGPDNDGDEEDGGDISDAPFEDMKDIRLAAAFLSGGGGAMPVNSNGQSWNNDFITTTGNVVLDLLHNFHLECGARLHKLRVYETLTDPTGREVCGYLLVRGSVHAHAYALALKKITGVEIEKMLPTPNIPLGNIPECQKYLDEGSHRRLYTFSPDDYKEMAGIWGNGEVALPDDPPGELMVVDGMPEGGKIQQLTGVPSAFTPDYAPEEMFEIATKLYKASR
BB934_11045_ANY78696.1	ANY78696.1	CP016616.1	Microvirga ossetica	typical catalase Group 7	MTKTTMTTTAGAPIADNQNSLSAGSRGPLLLQDYQLIEKLAHQNRERIPERVVHAKGSAAYGTLTITNDITRYSKAKVFSEIGKQTEAFLRFSTVAGERGAADAERDVRGFALKFYTDEGNWDIVGNNTPVFFVRDPVKFPDFIRTQKRHPATNLRSTTAMWDFWSLSPESLHQITILFSDRGLPQGYRFMHGFGSHTYSFINEADERFWVKFHFKSMQGIKTWTNREGEAVVAKDRESAQRDLYEAIEVGEFPRWKFCVQVMPETDAEKTSYNPFDVTKVWPHADYPLIEVGILELNRNAQHYFAEVEQSSFSPSNIVPGIGFSPDKMLQGRIFAYADAHRYRVGTHYEALPVNRPRCPVHHYHADGAMLSDIPNRGDAYYEPNSFNGPVQTRRAAEP…
BB934_15225_ANY79403.1	ANY79403.1	CP016616.1	Microvirga ossetica	typical catalase Group 3	MGKTPKAPSGTSDRVLTNRQGHPVANNQSQRTVGSRGPATLENYQFLEKITHFDRERIPERVVHARGFVCYGELEVTGKIGDEPASTYTRAKLFQQAGKKTPLAIRFSTVIGGRDSSEVARDPRGFAVKFYTEDGNWDLVGNNLAVFFIRDAIKFPDVIHSLKPDPITFRQEANRIFDFMSQTPESMHMLTHLFSPRGIPASYRHMEGFGVNTYKMVNAKGDTVLVKYHFHPRCGVASLTADEAAKVQGQDLGSASKDLYEAIERGEYPQWDLYVQIMEDHDHPELDWDPLDDTKVWPEKDFPLRHLGVMTLNRNVEDHFNENEQIAMGTGVLVDGLDFSDDKMLVGRTFSYSDTQRYRVGTNYLQLPVNQAKNARVSTNLNGGQMSYRRDLAPGQNPH…
BBC0122_005940_AQT46723.1	AQT46723.1	CP015625.1	Bartonella apis	typical catalase Group 7	MSERITLTTTAGAAVPDNQNSITAGPRGPVLIQDYQLLEKLAHQNRERIPERTVHAKGVGAHGVLKITGDITRYTKAAVFKPGTETPMLGRFSTVAGERGAADAERDVRGFALKFYTSEGNWDLVGNNTPVFFVRDAYKFPDFIHTQKRHPRTNLRSNTAQWDFWSLSPESLHQVTILMSDRGLPIDTMHMNGYGSHTYSLWNEKGERFWVKFHFKTMQGHKFYTNAEAKELVGTTRESSQEALYNAIESGNFPRWKVQVQIMPEADADKTPYNPFDLTKVWPHKDYPPMDIGIMELNRNPDDYFAEIEEAAFSPSNIVPGIGYSPDKMLQARIFSYADAHRYRLGTHYEQIPVNKPLCPVHNYHRDGQMNTYGGHSTNNVDAYYEPNSFNGPVEDKSA…
BBD30_07795_AQW94107.1	AQW94107.1	CP016372.1	Elizabethkingia endophytica	typical catalase Group 7	MENKKKLTNAAGIPYYNHEDSQTVGSRGPVLLQDFILQENLAHFVRERIPERIVHAKGSGAYGKFTVTGDISKYTRAKLFSKVGNECKMFARFSTVGGEKGSADTERDPRGFALKFYTEDGNWDLVGNNTPVFFIKDAKKFPDFIHTQKRVPRTNLKDHTVMWDYWSLNPESLHQVLILMSDRGTPHGYRHMHGYGSHTFAMINDKNERHWVKFHFKSQQGIKNFNNEEAADMKGKNPDFAQEDLVDAIDNGNFPKWTMQIQVMTEEQAKNFRWNPFDVTKVWPHNEYPLIDVGIMELNEVPVNYFAHVEQSTFAPSNLIDGISFSPDKMLQGRLFSYADAHRYRVGVNSHHLPVNACPFQVNNYQRDGYMTMGDNGGDAPNYFPNSFDNIAPDPTYKP…
BBD30_17440_AQW95831.1	AQW95831.1	CP016372.1	Elizabethkingia endophytica	catalase-peroxidase Group 4	MENQSNDISKCPFHNGTLEKQNVSSNGTQNKDWWPKQLTLDILRQHSSLTDPMDEGFNYAEEFKKLDLAAVKKDLTDLMTDSQDWWPADFGHYGPLFIRMAWHSAGTYRVQDGRGGGGRGQQRFAPLNSWPDNVSLDKARRLLWPIKQKYGKKISWADLLILTGNVALESMGLQTKGFGGGRTDVWEADKDVYWGDEKTWLGTDKRYTGDRDLEDPLAATTMGLIYVNPEGPEGKPDPLAAAKDIRDTFGRMGMNDEETVALIAGGHTFGKTHGAGDAALVGAEPEGAGIEAQGLGWASKFGTGSGADAITSGLEVTWTKTPTKWSNDFFEHLFSYEWELTKSPAGAHQWIAKDAGDIIPNAFDAEKKGPAYMLTTDLSLRFDPIYEKISRRFYENPEE…
BBD34_08210_AQX08625.1	AQX08625.1	CP016377.1	Elizabethkingia genomosp. 4	typical catalase Group 7	MENKKKLTNAAGIPYYNHEDSQTVGSRGPVLLQDFILQENLAHFVRERIPERIVHAKGSGAYGKFTVTGDISKYTRAKLFSKVGNECKMFARFSTVGGEKGSADTERDPRGFALKFYTEDGNWDLVGNNTPVFFIKDAKKFPDFIHTQKRVPRTNLKDHTVMWDYWSLNPESLHQVLILMSDRGTPHGYRHMHGYGSHTFAMINDKNERHWVKFHFKSQQGIKNFNNEEATEMKGKNPDFAQEDLVDAIDNGNFPKWTMQIQVMTEEQAKNFRWNPFDVTKVWPHSEYPLIDVGVMELNEVPVNYFAHVEQSTFAPSNLIDGISFSPDKMLQGRLFSYADAHRYRVGVNSHYLPVNACPFQVNNYQRDGYMAMGDNGGDAPNYFPNSFDNITPDPAYKP…
BBD34_17655_AQX10348.1	AQX10348.1	CP016377.1	Elizabethkingia genomosp. 4	catalase-peroxidase Group 4	MENQSNDISKCPFHNGTLEKQNVSSNGTQNKDWWPKQLTLDILRQHSSLTDPMDEGFNYAEEFKKLDLAAVKKDLTDLMTDSQDWWPADFGHYGPLFIRMAWHSAGTYRVQDGRGGGGRGQQRFAPLNSWPDNVSLDKARRLLWPIKQKYGKKISWADLLILTGNVALESMGLQTKGFGGGRTDVWEADKDVYWGDEKTWLGTDKRYTGDRDLEDPLAATTMGLIYVNPEGPEGKPDPLAAAKDIRDTFGRMGMNDEETVALIAGGHTFGKTHGAGDAALVGSEPEGSGIEAQGLGWASKFGTGSGADAITSGLEVTWTKTPTKWSNDFFDHLFRYEWELTKSPAGAHQWIAKDAGDIIPNAFDAEKKGPAYMLTTDLSLRFDPIYEKISRRFYENPDE…
BBD35_06415_AQX12030.1	AQX12030.1	CP016378.1	Elizabethkingia meningoseptica	typical catalase Group 7	MENKKKLTNAAGIPYYHHEDSQTVGSRGPVLLQDFILQENLAHFVRERIPERVVHAKGSGAYGKFTVTGDISQYTRAKLFSRVGNTCKMFARFSTVGGEKGSADTERDPRGFALKFYTEDGNWDLVGNNTPVFFIKDAKKFPDFIHTQKRVPRTNLKDHTVMWDYWSLNPESLHQVLILMSDRGTPYGYRHMNGYGSHTFAMINDKNERHWVKFHFKTQQGIKNFNNEDATDMKGKNPDFAQEDLVGAIDSGNFPKWTMQIQVMTEEQAKDFRWNPFDVTKVWPHSEFPLIEVGTMELNEVPVNYFAHVEQSTFAPSNLIDGISFSPDKMLQGRLFSYADAHRYRVGVNAHHLAVNACPYQVNNYQRDGYMAMGDNGGDAPNYFPNSFDNITPDPAYKS…
BBD35_15570_AQX13703.1	AQX13703.1	CP016378.1	Elizabethkingia meningoseptica	catalase-peroxidase Group 4	MENQSNDISKCPFHNGTLEKQNVSSNGTQNKDWWPKQLTLDILRQHSSLTDPMDEGFNYAEEFKKLDLAAVKKDLTDLMTDSQDWWPADFGHYGPLFIRMAWHSAGTYRLQDGRGGGGRGQQRFAPLNSWPDNVSLDKARRLLWPIKQKYGKKISWADLLILTGNVALESMGLKTIGFGGGRSDVWEADKDVYWGDEKTWLGTDKRYSGDRDLEDPLAATTMGLIYVNPEGPEGKPDPIAAAKDIRDTFGRMGMNDEETVALIAGGHTFGKTHGAGDAALVGAEPEGSGMESQGLGWASKFGSGSGADAITSGLEVTWTKTPTQWSNDFFEHLFSYEWELTKSPAGAYQWIAKDAGDIIPNAFDASKKGPAYMLTTDLSLRFDPVYEKISRHFYENPDE…
BBEV_2945_AOM84270.1	AOM84270.1	CP012502.1	Bacillus beveridgei	catalase-peroxidase Group 3	MDEQKKMNEQQGMCPVMHGGATSPTRGGTANQEWWPNQLNVSILHQHDKKTNPFDEDFNYKEAFNQMDYYAMKEDLKELMKTSQDWWPADYGHYGPFFIRMSWHAAGTYRTGDGRGGGGTGAQRFAPLNSWPDNANLDKARRLLWPIKQKYGNKLSWADLIILAGNVALEDMGLKTFGFGGGREDIWHPEEDIYWGSEDEWLGDNRYAGSRQDLENPLAAVQMGLIYVNPEGPNGEPDPKKSGEDIRETFKRMGMNDEETVALTAGGHTFGKSHGAGDAAHVGPEPEAAPAEEMGLGWKSDFRSGKGSDTITSGIEGAWTPTPTKWDNTYFELLLGYEWELIKSPAGAYQWKAVDVKEDHLAPDAENADKKVPTMMTTADMAMKMDPEYRKISERFYKN…
BBF93_06885_AXE63974.1	AXE63974.1	CP016437.1	Hyphomonas sp. CACIAM 19H1	typical catalase Group 5	MKDKDQSGLDAAGVLHQTADESREKLTTRQGVLVSDNQNHLKAGARGPMLMDDFVFREKLFHFDHERIPERVVHARGYGAHGFFETLDPLTDVTSADIFRKAGEKTPVFVRFSTVAGNKGSMDLARDVRGFAVKFYTKEGNWDLVGNNIPVFFIQDAIKFPDLIHAAKAEPDRGFPQAQTAHDNFWDFISLTPESMHMVMWIMSDRTIPRSYRFMEGFGVHTFRFVNEAGQSTFVKFHWKPAGGLQSVLWNEAVKINGADPDYHRRDLWDAIGAGDFPEWHLGVQLFDEAFADEFEFDILDATKIIPEELVPVRIVGRLVLDRVVDNFFAETEQVAFHTANIVPGIDFTDDPLLQGRNFSYLDTQLKRLGSPNFTHIPINQPHCPVSHFHQDGHMAMRN…
BBF93_11905_AXE64853.1	AXE64853.1	CP016437.1	Hyphomonas sp. CACIAM 19H1	catalase-peroxidase Group 3	MDGNDLPPQDKCPVMHGAITVAGNSNTAWWPETLNLDILHQHDTKVSPLGKDFNYRDAVKTLDFEALKKDMHDLMTNSQEWWPADYGHYGGLMIRLAWHSAGSYRLADGRGGGGSGNIRFAPLNSWPDNGNLDKARRLLWPIKKKYGNKISWADLILLSGTIAYESMGLKTYGFSFGREDIWAPEKDVYWGAEKEWLAPSDSRYENVDQPETMENPLAAVQMGLIYVNPEGVNGKSDPLKTAAQVRETFARMAMNDEETAALTCGGHTVGKAHGNGDASKLSPPPEGTDLEAQGFGWLNPHMDGKATNAITSGIEGAWTTHPTKWDMGYFKLLFGYDWELTKSPAGASQWRPINIKEEDMPVDPTDSSKRVMPMMTDADMAMKVDPTYNAICQKFMADP…
BBF96_03875_AZR72599.1	AZR72599.1	CP016379.1	Anoxybacter fermentans	Mn-catalase Group 02	MFKHEKHLLHEVKVDRPNPTYAAMLQEQLGGANGELKAALQYLAQSFRIKDKEIKDLFLDIAAEELGHMEMVATMINMLNGHDVEGQVVMSGTIEPQVLSGLTPMLTNASGAPFTGNYISATGDLAADILSNVAAEQGAKVVYEYLYRQINDKGVRETIDFLLNREEAHNALFREALNKIQGKGSGKDYGVDEDARLYFDLSAPGQYFKDPQPTSPGFQNPRQH
BBH56_05185_AUB78550.1	AUB78550.1	CP016382.1	Spiribacter roseus	catalase-peroxidase Group 3	MAAADIDKAGKCPVMHGGATSQSSDNMEWWPNALNLEILHQHDTKTNPMGEHFDYREEVKKLDYEALWNDMRAFMKDSQSWWPADWGHYGGLMIRMAWHAAGSYRTSDGRGGGGTGNQRFAPLNSWPDNTNLDKARRLLWPLKQKYGNQVSWADLIILAGTVAYESMGLKVFGFGYGREDIWHPEKDIYWGSEKEFLAPSDERYEDVENPETMENPLAAVQMGLIYVNPEGVNGNPDPLATAEQVRVTFDRMAMNDEETVALTAGGHTVGKCHGNGDAELLGPDPEAADVEEQGLGWNNHTTRGVGRDTVTSGIEGAWTTKPIEWDNGYFYLLLNYEWELKKSPAGAWQWEPVDIKEEDKPVDVEDPSIRLNPIMTDADMAMKMDPAYREISERFYNDP…
BBH88_03420_ANU09425.1	ANU09425.1	CP016534.2	Planococcus antarcticus DSM 14505	catalase-peroxidase Group 3	MENNEHDNNEQKRHTAASDAQCPVTGGGGQTGGHTDSAITTSNKPGKTQNKDWWPNMLNVNILHQHDKKSTPLGEEFDYKKEFEKLDYNALKQDLHDLMTDSQDWWPADYGHYGGLFIRMSWHDAGTYRTADGRGGGSTGNQRFAPLNSWPDNVNLDKARRLLWPIKQKYGNKISWADLLLLTGNVALESMGFKTFGFGAGREDVWAPEEDVYWGNEKEWLEDNRYSGERDLENPLAAVQMGLIYVNPEGPNGKPDPLGSAVDIRETFARMGMNDEETVALIAGGHTFGKAHGAGDPSQVGDDPEAAVMESQGIGWKSTYGSGKGRDTISSGVEGAWTANPTKWDNGYYEQLFGYEWELTKSPAGAYQWTAKDLSEHQMAPDAEDASIKVKTMMTTADM…
BBH88_05785_ANU09843.1	ANU09843.1	CP016534.2	Planococcus antarcticus DSM 14505	Mn-catalase Group 10	MFFHTGELQYHAKPDSPDPVFAKQVQELIGGQFGEMTVAMQYLFQGWGTRGNEKYRDLLMDTGTQELGHIEMLATMVARLLEGASVYEQEKAASDPIVGAIMGGMNPQHAIVHGLGASPKDSNGVPWNAGYIVASGNLLADFRANVNAESQGRLQVARLYSMTDDKGVKDLFSFLLARDTMHQNQWLAAIKELEAKEGPIVPGTLPPEWEATEYSHTLYTSSESSKELKWMSETAPDGHEFKFGKPEPFSTKPELKPAPPEAHNSLPEDKLK
BBH88_06155_ANU09909.1	ANU09909.1	CP016534.2	Planococcus antarcticus DSM 14505	typical catalase Group 5	MAKEPKVHENSKDEQLEQYRVDDSGKSLTTNQGLKMAEDEFSLKAGERGSTLLEDFHFREKMTHFDHERIPERVVHARGYAAHGVFEAYGSLEHLTKAKFLSGKSKKTPVFVRFSTVAGSKGSAETVRDARGFSTKFYTEEGNYDLVGNNMPVFFIQDAIKFPDFVHAVKPEPHNEMPQAASAHDTLWDFVINNQETAHMMMWLMSDRAIPRSFRMMDGFGVHAFRFVNAEGKSHFVKFNWKSTLGTHSLVWDEAQKIAGKDPDFNRRDLYDSIDQGNFPEWELGVQIIAEEDEHKFDFDLLDATKLWPQEEIPIQMVGKMTLNRNVDNVFAETEQVAFHPGHVVPGIDFSNDPLLQGRLFSYTDTQLLRLNGPNFHELPINRPVCPFHNNQRDGFGRQ…
BBI11_00510_ANU15661.1	ANU15661.1	CP016538.2	Planococcus maritimus	catalase-peroxidase Group 3	MDNNDQKRHTAASDAQCPFTGAGSGQPTSQTGGHQDSAITTSNKPGKTQNKDWWPNMLNINILHQHDTKTNPLGDEFDYQTEFEKLDYDALKQDLRDLMTDSQDWWPADYGHYGGLFIRMSWHAAGTYRTMDGRGGGSTGNQRFAPLNSWPDNVNLDKARRLLWPIKKKYGNKISWADLLVLTGNVALESMGFKTFGFGAGREDIWAPEEDVYWGNEKEWLTDNRYSGDRELENPLAAVEMGLIYVNPEGPNGKPDPLASARDIRETFSRMGMNDEETVALIAGGHTFGKAHGAGDPSNVGDDPEAAVMENMGIGWKSTHGSGKGRDTISSGIEGAWTANPTQWDNGYYEQLLGYEWELTKSPAGAYQWTAVDLSEGQMAPDAEDSSIKVKTMMTTADM…
BBI11_14550_ANU18187.1	ANU18187.1	CP016538.2	Planococcus maritimus	typical catalase Group 5	MAKDSKKVDENSKNEQLEQFRSDDSGKDLTTNQGLKLSEDEFSLKAGERGPTLMEDFHFREKMTHFDHERIPERVVHARGFAAHGEFEAYESLEHLTKAKFLSKKGKKTPVFVRFSTVAGSRGSAETVRDARGFSTKFYTEEGNYDLVGNNIPVFFIQDAIKFPDLVHAIKPEPHNEIPQAATAHDTFWDFVANNQESAHMVMWTMSDRAIPRSLRTMDGFGVHAFRFVNAEGKSHFVKFTWKSTLGVHSLVWDEAQKINGKNPDFHRADLHESIENGDYPEYELGVQIVAEEDEHKFDFDLLDATKMWPQEEIPIHIVGKMTLNRNVDNVFAETEQVAFHPGHVVPGIDFSNDPLLQGRLFSYTDTQLIRLGGPNFHELPINRPACPFHNNQRDGYGR…
BBI15_08925_ANU20330.1	ANU20330.1	CP016539.2	Planococcus plakortidis	typical catalase Group 5	MSKDHNKVDENSKNEQLEQYRSDDSGKDLTTNQGLKLSEDEFSLKAGERGPTLMEDFHFREKMTHFDHERIPERVVHARGFAAHGEFEAYESLEHLTKAKFLSEKGKKTPVFVRFSTVAGSRGSGELARDARGFSTKFYTEEGNYDLVGNNIPVFFIQDAIKFPDLVHAIKPEPHNEIPQAATAHDTFWDFVANNQESAHMVMWTMSDRAIPRSFRTMDGFGVHAFRFVNAEGKSHFVKFTWKSTLGVHSVVWDEAQKINGKNPDFHRADLHEAIENGDYPEYELGVQIVPEEDEHKFDFDLLDATKMWPQEEIPIHIVGKMTLNRNVDNVFAETEQVAFHPGHVVPGIDFSNDPLLQGRLFSYTDTQLIRLGGPNFHELPINRAVCPFHNNQRDGYGR…
BBI15_09225_ANU20383.1	ANU20383.1	CP016539.2	Planococcus plakortidis	Mn-catalase Group 10	MFFNRKELQFEAKPDKPDPIFAKQLQEVIGGQFGEMSVAMQYLFQGWNTRGNEKYKDLLMDTGTEELGHIEMLATMVAQLLEGAPVYEQEKAASDPVIGAIMGGMNPHHAIVSGLGATPENSAGVPWSAGYIIASGNLLADFRANVTAESQGRLQVARLYSMTDDKGVKDLLSFLLARDTMHQNQWIAAIRDLEEKEGGVIAPSTVPPEWEATEYSHTLYNFSEGEDSAQLPWMSGNAPDGHPFKYGQPQAFGQKPVLKPGPLESHDTLPEDKLKG
BBI15_09700_ANU20470.1	ANU20470.1	CP016539.2	Planococcus plakortidis	typical catalase Group 3	MKDNNEELKKKMSEGENEETLTNRQGHPVKDNQNLRTIGNRGPATLENYNFIEKISHFDREEIPERIVHARGAGAFGYFETYGTVGDEPVEKYTRAKVFSGKGKQTPLLVRFSTVAGSRHSPETARDPRGFAVKMYTEDGNWDLVGNNLKIFFIRDAMKFPDMIHAFKNDPVSNVPDPERMFDFVARSPEATHMITFLFSPWGIPATYRHMQGSGVNTYKWVNDKGEAVLVKYHWEPKQGIRNLTQAEADEIQAKNVGHATEDLYDSIENGDYPEWELFVQIMSDDEHAELDFDPLDDTKLWPMDKFPFLPVGKMVLNRNPENYHAEIEQAAFGTGVLVDGMDFSDDKMLIGRTFSYSDTQRYRVGANYLKLPVNAPRKRVATNQYGGAMDVPRGENAK…
BBI15_11345_ANU20764.1	ANU20764.1	CP016539.2	Planococcus plakortidis	catalase-peroxidase Group 3	MDNNEQKRHTAASDAQCPFTGAGGQQPTDQTGGHQDSAITTSNKPGKTQNKDWWPNMLNSNILHQHDTKSNPLGVEFDYKAEFEKLDYEALKQDLRDLMTNSQEWWPADYGHYGGLFIRMSWHAAGTYRTTDGRGGGSTGNQRFAPLNSWPDNVNLDKARRLLWPIKKKYGNKISWADLLVLTGNVALESMGFKTFGFGAGREDIWAPEEDVYWGNEKEWLADNRYSGDRELENPLAAVQMGLIYVNPEGPNGKPDPLASAVDIRETFARMGMNDEETVALIAGGHTFGKAHGAGDPSNVGDDPEAAVMENMGLGWKSSYGSGKGRDTISSGIEGAWTANPTQWDNGYYEQLFEYEWELTKSPAGAYQWTAVDLSEGQMAPDAEDPSIKVKTMMTTADM…
BBJ32_04245_ANR90558.1	ANR90558.1	CP016396.1	Mycobacterium avium	typical catalase Group 5	MATDHTSGAPDPKQRDLESARFRRDTGYLTTQQGVRVDHTDDALTVGERGPTLLEDFHAREKITHFDHERIPERVVHARGAGAYGYFEPYDDRLAQYTAAKFLTSPGTRTPVFVRFSTVAGSRGSADTVRDVRGFATKFYTEQGNYDLVGNNFPVFFIQDGIKFPDFVHAVKPEPHNEIPQAQSAHDTLWDFVSLQPETLHAIMWLMSDRALPRSYRMMQGFGVHTFRLVNARGEGTFVKFHWKPRLGVHSLIWDECQKIAGKDPDYNRRDLWEAIESGQYPEWELGVQLVAEDDEFSFDFDLLDATKIIPEEQVPVLPVGKMVLNRNPDNFFAETEQVAFHTANVVPGIDFTNDPLLQFRNFSYLDTQLIRLGGPNFAQLPVNRPVAQVRTNQHDGYG…
BBJ32_08425_ANR91298.1	ANR91298.1	CP016396.1	Mycobacterium avium	typical catalase Group 6	MAENHTTTNAGAPAPSDELSLTVGPDGPLLLQDSYLVEQMAAFNRERVPERQPHAKGAGAYGRFEVTADVSEYTKAAFLQPGAVTEVFARFSSGNSGERGSADTARDNRGFSVKFYTTEGNFDLVGSDVPVFAIRDPMKFPNLIRAGGRRADNDLHDHNMVWDFWTSCPETAHLVTLVMGDRGIPRTFRHMNGFGLHAFSWVNSAGEIHWVKYHFKTDQGIQWLPQEEGRRLAGTHPDCCVRDLYEAIARGEYPSWSLQVQLMPFADAKTYRFNPFDVTKVWPHADYPPIEVGTMTLDRNVTDHHAEVEQAAFAPSNLVPGTGLSPDRLLLGRSFAYPDAHRARIGVNHDQLPVNAARCAVRSYAKDGRMRIVNTADPVYAPNSAGGPHADPARAGEVH…
BBJ32_08430_ANR91299.1	ANR91299.1	CP016396.1	Mycobacterium avium	typical catalase Group 6	MTENFTTTNAGAPAPSDELSLTLGPDGPVLLQDFYLIEQLAAFNRERVPERQPHAKGTGAFGRFEVTNDLSAYTKAAVFQPGTKTDVFVRLSGNAGERGSADTVRDTRGFSVKFYTTEGNFDLVGLDFPVFVIRDPIKFPQMVRSAKRRANNDCRDHNMQWDFWTLSPESAHQVTMIMSDRGIPKTFRHMHGFGLHTFSFLNAAGEISWVKFHFKSNQGIEWLTQEEGDRLAGTDPDYCIRDLYEAIERGDHPSWSVKVQIMPFEDAKTYRFNPFDVTKVWPHADYPLIDLGTMTLDRNVTDHHTEVEQVTFAPHALVPGIGLSPDKLLLGRSFAYADAHRYRVGANHNQIPVNAPRCPVRSYSKDGQMRFVNSTDPVYAPNSYGGPKADPDRASVVKW…
BBJ32_09200_ANR91440.1	ANR91440.1	CP016396.1	Mycobacterium avium	Mn-catalase Group 03	MFVHNKDLQFEVRVDRPDPRFASLLMDQFGGANGELTAALQYFTQAFVLRQKNPKMYDLFMDIATEELSHLEMVGSMITMLLDGLNDNLKIANEKCDWMPAVASNGGGRDGLIHSVAVNPLFLVLSGGGPDVKDSGGNNWTGAYIDANGDPTVDLRNNVAAESRAKIVYEYLKQFTDDPGVQDTLTFLMTREVAHYQQFTAALNELPVNFPPGQLPGDPRFQNVAFNMSNGGGESIRGPWNQGQGPWPEGTEWDYVEKPEQQWLGSETRKNKGAERVPDGSPAVNAEKPFTHEQHVPTG
BBJ32_21260_ANR93573.1	ANR93573.1	CP016396.1	Mycobacterium avium	catalase-peroxidase Group 4	MSSDTSASRPPQPDTGTASKSESENPAIPSPHPKSNAPLTNRDWWPNQIDVSRLHPHVAEANPLGEDFDYAEEFAKLDVEALKADVISVMTTSQDWWPADYGHYGGLFIRMSWHAAGTYRIHDGRGGGGQGMQRFAPLNSWPDNVSLDKARRLLWPVKKKYGNKISWADLIIFAGNCALESMGFKTFGFAFGREDVWEPEEILWGEEDEWLGTDKRYPGTGERELAQPYGATTMGLIYVNPEGPEGKPDPIAAAIDIRETFGRMAMNDEETAALIVGGHSFGKTHGAGDADLVGPEPEAAPIEQQGLGWKSSYGTGVGKDAITSGLEVVWTPTPTKWDNTFLETLYGYEWELTKSPAGAWQFTAKDGAGAGTIPDPFGGPGRAPTMLVTDISLRESPIY…
BBK82_06770_ANZ35831.1	ANZ35831.1	CP016793.1	Lentzea guizhouensis	catalase-peroxidase Group 4	MSDSTDAKVSESKGECPVAHSRRSHPSEGGSNRDWWPNQLNLRILRKHPVQANPMGGDFDYSKEFLTVDLDELARDVDAVLTESKDWWPADFGHYGPFMIRMAWHSAGTYRTHDGRGGAGAGMQRFAPLNSWPDNGNLDKARRLLWPVKKKYGKKLSWADLMIFTGNRALETMGLKTFGFAGGRTDVWEPDEDVYWGPETEWLGGDTRYSGERDLESPLAAVQMGLIYVNPEGPNSNPDPLAAARDIRETFGRMGMNDEETVALIAGGHTFGKAHGAGDPSLVGAEPEGSLMDAQGFGWISTHGTGKGRDAITSGLEVTWTQQPTKWTNLFFKNLFEFEWELTKSPAGAHQWKPKGDAGANTVPDPEDGTLNRQPMMLTTDLSLRFDPIYEPISRRFAQ…
BBK82_33735_ANZ40259.1	ANZ40259.1	CP016793.1	Lentzea guizhouensis	typical catalase Group 7	MSFQDNTTPLTTAAGAPVADNQNSLTAGPRGPVLLQDLWLLEKLAHFDREVIPERRMHAKGSGAFGTFTVTADLTAYTSAALFSSVGNQCETFVRFSTVAGERGAADAERDIRGFATRFYTGEGNWDVVGNNTPAFFFRDPLKFPDLAHAVKRDPRTNMRDPENNWGFWTNLPEALHQVTIVMSDRGIPRSYRHMHGFGSHTYSMVNADGVRHWVKFHFRTQQGIENLTDEQAGQLIGRDRESHQRDLYDSIERGQFPTWKLYLQLMPEADAASYRFHPFDLTKVWSKKDYPLVEAGELRLDRNPDNYFADVEQVAFTPANVVPGISLSPDKMLQGRLFSYGDAARYRLGVNHHQIPVNHPTGARLVNSYHRDGAMRVDGNQGGVPGIQPNNFGRWAEQ…
BBK82_37520_ANZ40841.1	ANZ40841.1	CP016793.1	Lentzea guizhouensis	typical catalase Group 5	MANRKPGKVVKAALEKAVDKVTEVVNPPIPGVPNSEPPSLEEPTEPRGPLPPKGDQNGPETVSPTGAPTGAPQIVNAQQGEFLTTSAGARLYDTDHSLKAGERGPTLLQDHHLREKIMHFDHERIPERVVHARGYGAHGVFVGYGTATNVCKSAFLGDGVETPVFVRFSTVLGSRGSADTVRDTRGFATKFYTQEGNFDLVGNNIPVFFIQDGIKFPDIIHAGKPHPDREIPQAQSAHDTFWDFVSTHTEATHHVMWNMSDRGIPRSYRTMEGFGVHTFRLVNAEGETALAKFHWKPKLGVHSLVWEEAQMINGIDPDFHRRDLADAIESGAYPQWELGLQIFPDTPRQTFEGIDLLDSTKIVPEELAPVQPVGLLTLNRNTKNFFAETEQVAFHLGNL…
BBK82_42440_ANZ41627.1	ANZ41627.1	CP016793.1	Lentzea guizhouensis	Mn-catalase Group 10	MFLHTSRLQFEAKPDRPDAHYARKLQELIGGAYGEMTVTMQYLFQGWNCRMEGKYKDLIMDVATEEIGHVEMLATMVARLLEGAPTGVTAKMVEDDPVIAAVIGGMDPQQAIVSGGGPTLSDSNGVPWNGRYIVASGNLMADFRANVAAEAQGRLQTARLYNMTDDTGVRDMLKFNLARDTAHQNMWLAAIEELQEDGLEGPIAPSVLFDEEHAEHAGTIWHNSDGALGAEGGWASGTAPDGAHEFSYVMNPEPLGGHASAPKPDPLLYATSPANLGLIEKAIRKLT
BBN53_10040_ANY16208.1	ANY16208.1	CP016440.1	Bordetella pseudohinzii	typical catalase Group 6	MTDKLFDTKAPSTTTTGAPAVSDRNSLTVGPDGPIVLHDVHFLEQMAHFNREKVIERQPHAKGSGAFGVFETTEDVSKYTKAALFKRGAKTEMLARFSTVAGEQGSPDTWRDVRGFSLKFYTSEGNYDLVGNNTPVFFVRDPMKFPHFIRSQKRLPDRGLRDNHMQWDFWTNNPESAHQVTYLMGVRGLPRSWRQMNGYGSHTYMWVNAKGERFWVKYHFHTQQGMAFFSNAEAAAMAGADADFHRRDLFEAIERGDCPSWVMSVQVMPYADAKKYRINPFDLTKTWSHKDYPLIKVGTMTLNRNPVNFFAEIEQAAFSPGNTVPGIGLSPDKMLLGRAFAYNDAQRNRIGANFHQLPVNQPKVPVNTYMIDGPMAYHHTGAAPVYVPNSGDRPWSDET…
BBN53_20800_ANY18110.1	ANY18110.1	CP016440.1	Bordetella pseudohinzii	catalase-peroxidase Group 4	MSNEAKCPFNHSAGSGTTNQDWWPKRLRLELLSQHSEKSNPLDPAFDYAQAFKSLDLAALKKDLAALMTDSQDWWPADFGHYGPLFIRMAWHSAGTYRIGDGRGGAGRGQQRFAPLNSWPDNVSLDKARRLLWPIKQKYGNKISWADLLILAGNVALESMGFKTFGFAGGREDTWEPDQDVYWGNERTWLGGDLRYGKQAGGKDEGTVVADEQLHGKESGRKDGGRNLENPLAAVQMGLIYVNPEGPDGHPDPLASAQDIRDTFGRMAMNDEETVALIAGGHTFGKTHGAGPADHVGPEPEAAELENQGLGWKSSFRSGKGGDTITSGLEVTWTSTPTRWSNNFFWNLFGYEWELTKSPAGAHQWIPKHGAGAGSIPDAHDPAKRHAPAMLTSDIALRV…
BBR43_09685_ATZ06427.1	ATZ06427.1	CP024931.1	Corynebacterium striatum	typical catalase Group 6	MTNSEADKVLNKGQRPAGGPNTTSPSGQPIATENTSITAGQNGPVVLNDIHLIEKLAHFNRERVPERTPHAKGHGAFGELHITNDVSKYTKAKLFQPGTVTPMMGRFSTVAGEQGSPDTWRDVHGFALRFYTEDGNYDIVGNNTPVFFLRDGMKFPDFIHSQKRLGVNGLRDADMQWDFWTRNPESTHQVTYLMGDRGTPKTTRHQNGYGSHTFQWVNEEGDAFWVKYHFKTRQGVQNFTDAEAGEMAGKNADYHREDLYNAIEEGDYPIWDVKVQIMPLAEAAEYRFNPFDLTKVWSKKDYPLVDVGYFVLNRNPRNFFAQIEQVALDPSNLVPGIGLSPDKMLQARVFAYADQQRYRIGPNYKQLPVNQPLNADKVNTYEHEGNMQFLFNAPEDPVY…
BCAL3299_CAR53623.1	CAR53623.1	AM747720.1	Burkholderia cenocepacia J2315	catalase-peroxidase Group 4	MSNETKCPFNHTAGSGTTNKDWWPNQLNLNVLHRHSALSDPMDPDFDYAEAFKKLDLAAVKQDLHALMTTSQDWWPADFGHYGGLFVRMAWHSAGTYRTADGRGGAGGGQQRFAPLNSWPDNVSLDKARRLLWPIKQKYGRNISWADLLILTGNVALESMGFKTFGYAGGRVDTWEPDDVYWGSEKIWLELSGGPNSRYTGKRELESPLAAVQMGLIYVNPEGPDGNPDPVAAAHDIRETFARMAMNDEETVALIAGGHTFGKTHGAGPASNVGPEPEAAGLEEQGLGWKSTFGTGKGKDTITSGLEVTWTSTPTKWSNDFFKHLFSYEWELTKSPAGAHQWVAKDADEVIPDAYDASKKHRPTMLTTDLSLRFDPAYEKISRRFYENPAEFADAFARA…
BCAM0931_CAR54788.1	CAR54788.1	AM747721.1	Burkholderia cenocepacia J2315	typical catalase Group 4	MSSSSPRVLRHAVAAICVALSASPYAAELTRDTGAPVGDNQNSQTAGPAGPVLLQDSALIEKLQRFDRERIPERVVHARGTGAFGEFVPSADISDLTKAKVFTPGTRTPVFVRFSTVMGYRGSPEQARDPRGFAVKFYTQQGNWDMVGINWPVFFIRDGIKFPDFVHANKPSAVTGVQDPNLAFDFFAHTPEATHMLTRLYTDEGMPDSYRHMDGFAVHAFKFVNAQGDVHYVKFHWKSRQGVHGLRPQEIAASIGRDWNMMTNDLYGALKQGDFPKWDLYVQVLTPKDLNRFDFNALDDTKVWTGVPERKIGTMTLNRVPDNYFQSTEESAFAPSRLVPGIEPSEDRMLQDRLFAYADTQMYRLGANYMDLPINRPVVPVVNNNQDGKMNAGDRKGEV…
BCAM2107_CAR55964.1	CAR55964.1	AM747721.1	Burkholderia cenocepacia J2315	catalase-peroxidase Group 4	MSNEGQCPFNHANGGGTTNRDWWPNELRLDLLSQHSSKTDPLDPGFNYAEAFNSLDLDALRKDLAALMTDSQDWWPADFGHYGPLFVRMAWHSAGTYRMGDGRGGAGRGQQRFAPLNSWPDNVSLDKARRLLWPIKQKYGQKISWADLLILTGDVALTTMGFKTFGYAGGREDTWEPDRDVYWGSETTWLGGDLRYDKGGACESQHGGNAGRNLENPLAAVQMGLIYVNPEGPDGNPDPVAAAYDIREVFGRMAMNDEETVALIAGGHAFGKTHGAGPADNVGLEPEAAGLEQQGLGWKNSFGTGKGADTITSGLEVTWSDTPTQWGMGFFKNLFGYEWELTKSPAGAHQWVAKNAEPTIPHAHDPSKKLLPTMLTTDLSLRFDPVYEKISRHFMDNPD…
BCB70_06160_AOH45554.1	AOH45554.1	CP017040.1	Propionibacterium sp. oral taxon 193	typical catalase Group 6	MPIDPSRTSTNTNGSPAPSDEYSLTVGADGPVVLHDAHLVDTLAHFNRENIPERKPHAKGSGAFGHLEITADVSEYTKASFLQKGRDTPMLARFSTVAGELGSPDTWRDVRGFSLKFYTDEGNFDLVGNNTPVFFMRDPMKFPHFIRSQKRLPSSGLRSPNMMYDYWSLSPESAHQVAYLMGPRGIPLSYRTMNGYSSHTYSWTNADGQITWVKYHFISDQGVHNMTADQAKAIVGDHPDIHREDLFNHIADGDYPSWTVKVQLMPYDAAKDYRFNPFDITKVWPHRDYPLHTIGKFTLDRNPENFFAQIEQAAFSPSNTVGGTGLSPDRMLLSRAFAYNDAARNRLGVNYEQLPVNRPTTPTNQYTFDGQMAFEHSGAAPTYAPNSYGRDFATGYRAG…
BCCGELA001_00250_AMA54844.1	AMA54844.1	CP013949.1	Bradyrhizobium sp. CCGE-LA001	catalase-peroxidase Group 4	MDDTSKCPFTGGKPTRTNRDWWPTQLNIEVLHKNSDKSDPMDKDFDYAKEFKSLDLNAVIKDLTALMTDSQEWWPADFGHYGGLMIRMAWHSAGTYRTTDGRGGAGAGQQRFAPLNSWPDNANLDKARRLLWPIKQKYGRKISWADLMVLAGNVALESMGFKTFGFAGGRADVWEPEELYWGPEGTWLGDERYSGERQLAEPLGAVQMGLIYVNPEGPNGKPDPVAAAKDIRETFARMAMNDEETVALIAGGHSFGKTHGAGDPSLVGPEPEAGALEDQGLGWKSKHASGHSGDAITSGLEVTWTATPTKWSNNFFENLFNFEWELTKSPGGANQWTAKGADAIIPDAFDKSKKHRPTMLTTDLSLRFDPAYEKISRRFLENPDQFADAFARAWFKLTH…
BCCGELA001_03740_AMA55471.1	AMA55471.1	CP013949.1	Bradyrhizobium sp. CCGE-LA001	typical catalase Group 7	MSDKRPHLTHATGAPVSDNLNIMTAGRRGPALLQDVWLIEKLAHFDREVIPERRMHAKGSGAFGTFTVTHDISGYTKANIFSEIGKVTPMFARFSTVAGERGAADAERDIRGFALKFYTEEGNWDMVGNNTPVFFFRDPLRFPDLNHAIKRDPRTGMRSADNNWDFWTLLPEALHQVTIVMSERGIPKSFRHMHGFGSHTYSFINAANERTWVKFHFRTQQGIENLTDAEAEALIGKDRETHQRDLFESIERGDFPRWTMFVQVMTDDQAKAFAFNPFDLTKIWPKADFPLIEVGYFELNRNPENVFAEVEQASFSPAHIVPGIGFSPDKMLQARLFSYGDAARYRLGVNHHLIPVNAPKCPYHSYHRDGAMRIDGNLGRTPTYFPNSRGEWADQPDLN…
BCCGELA001_22230_AMA58720.1	AMA58720.1	CP013949.1	Bradyrhizobium sp. CCGE-LA001	Mn-catalase Group 09	MYYFDKRLQYPVKVEKPDPIFARQLQQAIGGVEGEIRVCLQYFFQAWGARGPAKYRDVLLNTATEEISHIEMLSTAVALNLENAPATMQETSLQGNPIVGAVMSGGERPRHVIEGMLHKHILSTGMAAFPSDSDGIPFDCSHIYASGNLAADMYCNVAAESTGRTLAVRLYNSTSDPGMQDMLSYLIARDTMHQQQWLAVIEEMGGEASMPIPNSFDRSKEATEFAYMFMGTERNGAPVPPGRYSEGPSLDGRGEFSARPGFEPLGDVPVLGPARPDSAAQVEQMQEPPVTNALT
BCM27_13810_ANY23723.1	ANY23723.1	CP016594.1	Gordonia terrae	catalase-peroxidase Group 4	MAPHDPSSVSAPPPPEAREHPPIAEANTEPAGGGTCPVAHGRLKPPTQGGGNRDWWPNQLNLKVLQHNPDVANPMDADFDYDSALETLDVGALRADLIALMTDSQDWWPADFGHYGGLFVRMSWHAAGTYRVEDGRGGAGAGMQRFAPLNSWPDNANLDKARRLLWPIKKKYGTALSWADLLVFAGNVALESMGFTTAGFAFGRVDEWEPDEVYWGPELEWLADQRYSGNRDLENPLAAVQMGLIYVNPEGPNGNPDILASAVDIRETFARMAMNDVETAALIVGGHTFGKTHGAGDAGLVGPEPEAADVADAGLGWTSSHGMGKGADAITSGLEVIWNPTPTTWDNAFLETLYGYEWELYKSPAGANQWRPKDGAGAGTVPKAFGEDTTHPSMLTTDL…
BCM27_21430_ANY25028.1	ANY25028.1	CP016594.1	Gordonia terrae	catalase-peroxidase Group 4	MTSDSRPPNSDEQTRSNSESENPVISSPEPKAHAPLTNKDWWPEQIDLSILHAHSSLSNPLGEDFDYSAEFAKLDVEALKADLVSLMTTSQDWWPADYGHYGGLFIRMSWHAAGTYRIFDGRGGGGQGAQRFAPLNSWPDNANLDKARRLLWPIKQKYGTKLSWADLLVFAGNVALESMGFKTFGFGFGREDIWEPEEVFWGPEDAWLGTDKRYSGERELAKPLGATTMGLIYVNPEGPEGKPDPIAAAEDIRETFSRMAMNDEETAALIIGGHSFGKTHGAGNADLIGPEPEGAPIEQQGLGWKSGYGKGKAEDTVTSGLEVVWTSTPTQWGNGFLQNLYGYEWELTKSPAGAWQYVAKDGAGAGTIPDPFGGPGRAPTMLVTDVALRESPIYADITR…
BCM27_23945_ANY25454.1	ANY25454.1	CP016594.1	Gordonia terrae	typical catalase Group 6	MSDDSLFTTRDSGAPAGSDEHSLTVGAGGPIVLHDHYLIEQMAQFNRERIPERQPHAKGSGAFGTFETTQDISAYTCAALFQPGVKTEMVARFSTVAGERGSPDTWRDPRGFALKFYTSEGIYDMVGNNTPVFFVKDPMKFQHFIRSQKRRQDNNLRDHDMQWDFWTLSPESAHQVTWLMGDRGIPKTWRHMNGYTSHTYLWVNAEGVKHWVKYHFKSDQGVEHLTQHEADQMAAADTDFHTRDLFENIAAGNHPSWTLKVQLMPFDDAVSYRFNPFDLTKVWPHGDYPLIEVGRMTLHTNPVDHHTQIEQAAFEPNNVVPGIGFSPDRMLLARVFSYADAHRHRIGGNYKQIPVNAPTNEVHSYSKDGAMRIHNVPDPVYAPNSKGGPSALYPGQGEP…
BCM27_24645_ANY25573.1	ANY25573.1	CP016594.1	Gordonia terrae	Mn-catalase Group 05	MYLHTQQLINEIAVDEPDPAAANALQEGLGGQFGEMRTMMQYLFQSMNFRGDPASKPYRDLLQGVGTEEISHVELIGTTISRLLDGSPEYSGKKTDPVDKPGAKGATPLKIALDTSNIHHYLVGAQGALPVDAAGNPWSGSYVYNSGNLVLDLLYNLMLESTGRLQKCRIYEMTDNKTARSTIAYLIVRDQAHENAFAKALESLGVNWGSILPIPKTNAERFPEVKKLVDQGLQSVQFTFSADDQSDAAKLYRGASPSGDGTELSTAIMPEGFPMTIAPERREEFAPGLDKDLLALIQATAEVEIAAADDPGKM
BCM40_00335_ANU21871.1	ANU21871.1	CP016543.2	Planococcus donghaensis	catalase-peroxidase Group 3	MENNEEKRHTAAGEGQCPVTGGHKDSAITTSNKPGKTQNKDWWPNMLNVNILHQHDTKTNPLGEEFDYKTEFEKLDFDALKQDLHKLMTDSQDWWPADYGHYGGLFIRMSWHAAGTYRTADGRGGGSTGNQRFAPLNSWPDNVNLDKARRLLWPIKQKYGNKISWADLLVLTGNVALESMGFKTFGFGAGREDIWAPEEDVYWGNEKEWLEDNRYSGDRELENPLAAVQMGLIYVNPEGPNGKPDPLGSAVDIRETFARMGMNDEETVALIAGGHTFGKAHGAGDPDQVGDDPEAAVMENQGLGWKSSYGSGKGRDTISSGVEGAWTANPTQWDNGYFEQLFEYEWELTKSPAGAYQWTAKDLSEEQMAPDAEDSSIKVKTMMTTADMALRKDPVYEKI…
BCM40_02490_ANU22279.1	ANU22279.1	CP016543.2	Planococcus donghaensis	typical catalase Group 5	MAKEPKVNENSKDEQLQQYRVDDSGKSLTTNQGLKMAEDEFSLKAGERGPTLMEDFHFREKMTHFDHERIPERIVHARGYAAHGVFETYESLEHLTKAKFLSEKGKKTPVFVRFSTVAGSKGSAETVRDIRGFATKFYTEEGNYDLVGNNVPVFFIQDAIKFPDFVHAVKPEPHNEMPQAASAHDTLWDFVINNQETAHTIMWLMSDRAIPRSFRMMDGFGVHAFRFVNAEGKSHFVKFNWKSTLGTHSLVWDEAQKIAGKDADFNRRDLYESIEQGDFPEWELGVQIVAEEDEHKFDFDLLDATKLWPQEEIPIQIVGKMTLNRNVDNVFAETEQVAFHPGHVVPGIDFSNDPLLQGRLFSYTDTQLLRLNGPNFHELPINRPVCPFHNNQRDGFGRQ…
BCOUA_II0355_CDL77901.1	CDL77901.1	HG803176.1	Brucella canis str. Oliveri	typical catalase Group 7	MTDRPIMTTSAGAPIPDNQNSLTAGERGPILMQDYQLIEKLSHQNRERIPERAVHAKGWGAYGTLTITGDISRYTKAKVLQPGAQTPMLARFSTVAGELGAADAERDVRGFALKFYTQEGNWDLVGNNTPVFFVRDPLKFPDFIHTQKRHPRTHLRSATAMWDFWSLSPESLHQVTILMSDRGLPTDVRHINGYGSHTYSFWNDAGERYWVKFHFKTMQGHKHWTNAEAEQVIGRTRESTQEDLFSAIENGEFPKWKVQVQIMPELDADKTPYNPFDLTKVWPHADYPPIDIGVMELNRNPENYFTEVENAAFSPSNIVPGIGFSPDKMLQARIFSYADAHRHRLGTHYESIPVNQPKCLVHHYHRDGQMNVYGGIKTGNPDAYYEPNSFNGPVEQPSA…
BCV53_00560_ANZ28741.1	ANZ28741.1	CP016622.1	Parageobacillus thermoglucosidasius	typical catalase Group 6	MADTKKLTTSWGAPVGDNQNSITAGNPGPTLIQDVHLIEKLAHFNRERVPERVVHAKGAGAHGYFEVTNDMSKYTKAKVFNGVGKRTPVFVRFSTVAGELGSADTVRDPRGFAVKFYTEEGNYDIVGNNTPIFFIRDAIKFPDFIHTQKRDPRTHLKNPTAMWDFWSLSPESLHQVTYLFGDRGIPLTYRHMNGYGSHTFKWVNEKGEAVWVKYHFKTNQGVKNMDPELAVKIAGENPDYHTEDLYNAIEKGDYPSWTLYVQIMPLEDAKTYRFNPFDVTKVWSHKDYPLIEVGRMVLNRNPENYFAEVEQATFSPGNLVPGVEPSPDKMLQARLFAYADAHRYRVGVNHNLLPINRPRVEVNNYQRDGFMRFDNNGGGSVNYEPNSFGGPTEVPEHKT…
BCV53_00565_ANZ28742.1	ANZ28742.1	CP016622.1	Parageobacillus thermoglucosidasius	Mn-catalase Group 07	MFTRIDKLAIELPEPKYADANAAAAVQELLGGRFGEMSTLNNYLFQSFNFRQKKKLKPFYDLIASITAEEFGHVELVSTAINLCLTGSTHPGDPDIAPMRNAVDKRNTYHFIATAQTAFPGDSMGKAWTGDYVFSSGNLILDLLHNFFLECGARANKMRVYEMTDHPVAREMVGYLLVRGGVHIIAYAKALEVATGVDVTKMLPIPNLDNKKFDVARKFEEQGVHRRLYTFSDKYYKDIAQIWKGTHPLDGQPLEVIEGIPQGGPVPELAEIPEAFAPGVSAEDFFEIAKRLQRSAGL
BCV53_15825_ANZ31428.1	ANZ31428.1	CP016622.1	Parageobacillus thermoglucosidasius	Mn-catalase Group 01	MWIYEKKLQYPVRVSTCNPKLAKYLIEQYGGADGELAAALRYLNQRYTIPDKVIGLLTDIGTEELAHLEMIATMVYKLTKDATPEQLKEAGLDAHYVNHDRALFYHNAAGAPFTATYIQAKGDPIADLYEDIAAEEKARATYQWIINMSDDPDLNDGLRFLREREIIHAQRFREAVEMLKEERDQKKFF
BD65_826_AJI96667.1	AJI96667.1	CP009539.1	Yersinia ruckeri	typical catalase Group 7	MSKKKGLTTAAGAPVVDNNNVITAGPRGPMLLQDIWFLEKLAHFDREVIPERRMHAKGSGAYGTFTVTHDITQYTRAKIFAEVGKKTDMFVRFSTVAGERGAADAERDIRGFAMKFYTEEGNWDLVGNDTPVFYLRDPLKFPDLNHVVKRDPRTNLRNPIYKWDFFSQLPEALHQLTIDFSDRGLPKSYRHMHGFGSHTFSFINGQNQRYWVKFHFRCQQGIENLMDDEAEKLIGSDRESSQRDLYEAIERGDFPRWNLQVQIMPEQEASEVPYNPFDLTKVWPHADYPLIDVGYFELNRNPENYFSEVEQAAFNPANVVPGISFSPDRMLQGRLFSYGDAHRYRLGVNHHQIPVNGAKCPFHNYHRDGAMRVDGNSGNTATYEPNSFGLFQEQPDFSE…
BDI_1740_ABR43487.1	ABR43487.1	CP000140.1	Parabacteroides distasonis ATCC 8503	typical catalase Group 7	MEDKKLTAANGRPVADNQNVQTVGPRGPMVLQDPWFIEKLAHFDREVIPERRMHAKGSGAFGTFTVTHDITKYTKAAIFSEVGKKTDCFVRFSTVAGERGAADAERDIRGFAMKFYTEEGNWDLVGNNTPVFFLRDPLKFPDLNHAIKRDPKTNLRSEDNNWDFWTLLPEALHQVTITMSSRGIPYSYRHMHGFGSHTYSFINDKNERIWVKFHLRTLQGIKNLSDEEAAAIIAKDRESHQRDLFESIERGDFPKWKFQIQLMTEEQAETYPINPFDLTKVWPHKDFPLMDVGILELNRNPENYFQDVEQAAFNPMNTVEGIGFSPDKMLQGRLFSYGDAQRYRLGVNLEQIPVNKPRCPFHAYHRDGTMRVDGNYGAAKGYEPNSFGEWKDSPEKKEP…
BEH62_01710_AWG00311.1	AWG00311.1	CP021038.1	Clavibacter insidiosus	Mn-catalase Group 05	MYFHAQTWINEIADGEPDPAAANALQEGLGGQFGEMRTMMQYLFQAMNFRGAAAKPYRDLIQGVGTEEISHVELIGTTISRLLDGAPEYTGKLTDPLDTPGKGGKTPLSIALDHGNIHHHLVGAQGALPVDAAGNPWSGSYVYNSGNLPLDLLYNVMLESTGRLQKCRIYEMTDNPVARATVAYLIVRDQAHENAYAKALETLGVDWGKLLPIPKTNAEQFPEVKKLVDLGLQSKQYSFDLDGKSEAGRIFQGASPSNDGTDLTATEQAPVGVPSTIAPERLEEFAPGLDKDLLALIQETAERELAEVEAFYGPKA
BEH62_03220_AWG00607.1	AWG00607.1	CP021038.1	Clavibacter insidiosus	typical catalase Group 6	MTDQKYTTTDSGAPVASDEHSLSVGPDGAIPLHDHYLVEKLAQFNRERIPERVVHAKGGGAFGTFRVTGDVSAYTRASLFQPGAEVEMLARFSTVAGEQGSPDTWRDPRGFALKFYTDEGNYDLVGNNTPVFFIRDGIKFPDFIRSQKRLPGSHLRDHDMQWDFWTLSPESAHQVTWLMGDRGLPSSWRHMDGFGSHTYQWINAAGERFWVKYHFKTQQGIEILKQEQADQIAGEDADFHIRDLTEAIDRGDYPEWKLEVQIMPYEEAKSYRFNPFDLTKVWSQKDYPRIEVGTMTLNRNPENYFAQIEQAAFAPSNFVPGIQTSPDKMLLARIFSYADAHRYRVGTNHAQLPVNAPKSPVHSYSKDGQGRYTFQDAGTPVYAPNSHGGAHADPARAAE…
BEH62_14720_AWG02844.1	AWG02844.1	CP021038.1	Clavibacter insidiosus	Mn-catalase Group 10	MFFHKQELQHSATPDKPDPIYARHLQEVLGGQYGEISVAMQYGFQSWNSKLPGKYRDMLYGIGAEEFGHVEMLAIMIAKLLETAPVEATEDAMKDPTLAAVIGGGDIQHAIVAGAGARPVDANGNPWQGSFITASGNLLADFHANANAEMQGRLQVARLHHMTDDKGVKDLLSFLLARDTMHQNQWLAAIAELQAEGTESLPVPGDFPIELEDRDVSYQYLNFSDGPAAAEGTWASGPAPDGKGTFSYHDGPTSSVPMPAPPLGNPLLHGTIPPKDPGLLKKAASAVKDAVTPE
BEN51_03165_ASW42511.1	ASW42511.1	CP016786.1	Clostridium isatidis	Mn-catalase Group 02	MFEHKKQLLYEVKIEKPNPQYAMLLQEQLGGANGELKAAMQYLSQSFRIKDQEIKDLFLDIAAEELSHMEIISTTINLLNGHDLDYKGVGVGQIEAHVLGGLSPLLMNSSGHPWTADYINCTGDLVADLLSNIAAEQRAKVVYEYLYRQIEDKEVRKTIDFLLNREEAHNALFREALNKIQDTGSNRDFGVTEDSKLYFNLSNPGPNHKAPNPTAPSFENTRR
BER92_13245_AOD15508.1	AOD15508.1	CP016830.1	Xanthomonas fragariae	catalase-peroxidase Group 4	MTTEAKCPFNHAVLGTGTTNIDWWPKQLRVDLLSQHSSKSNPLGQSFNYAEAFKSIDLQALKQELRALMTDSQDWWPADFGHYGPLFVRMAWHSAGTYRIGDGRGGSGRGQQRFAPLNSWPDNVSLDKARRLLWSIKQKYGQAISWADLMILTGNVALESMGLKTFGFAGGREDTWEPDQDVYWGRETKWLGGDERYTRGSPGVDETHGVLVKDDDSQVQHTRDLENPLAAVQMGLIYVNPEGPDGKPDPIAAAIDIRDTFARMAMNDEETVALIAGGHTFGKTHGAADAEHVAAEPEASDLESQGLGWHNSYGSGKGADTITSGLEVTWTTTPTQWSNDFFDHLFKFEWELTKSPAGAHQWVAKDADAIIPDAHDASKKHRPTMLTTDLALRFDPAYA…
BER92_15065_AOD15783.1	AOD15783.1	CP016830.1	Xanthomonas fragariae	typical catalase Group 5	MPKSPSKPEQLSAIAAASATSDVLRGSGDELHQKAGRTHRQLTTNQGIAVDDNQNSLRATPRGPTLLEDFILREKITHFDHERIPERIVHARGSAAHGYFELTKSLSQYTTAKIFTEVGEKTPLFTRFSTVAGGAGSVDTPRDVRGFAVKFYTKEGNWDLVGNNIPVFFIQDAIKFPDLIHAVKMEPDRGFPQAASAHDTFWDFISLTPESMHMVMWAMSDRTIPRSLRMIEGFGVHSFRFLNENGESTFVKFHWRPKLGLQSTIWDEAVKIAGADQDFHRRDLFEAIQRGNFPEWELGVQLFTEAHADAFPFDHLDSTKVIPEELIPLQIVGRMVLDRWPDNFFAETEQVAYCAANIVPGIDFSNDPLLQGRLFSYLDTQLSRLGGPNFHQIPINAPK…
BER92_18515_AOD16301.1	AOD16301.1	CP016830.1	Xanthomonas fragariae	typical catalase Group 4	MRPGFLTVLVLLAPALIALPVFAQSVLTRDNGAKVGDNQNSQTAGATGPTLLQDVQLIQKLQRFDRERIPERVVHARGTGVKGEFTATADLSNLTKAKVFSSGEKIPVFVRFSSVVHGNHSPETLRDPHGFATKFYTSEGNWDLVGNNFPTFFIRDAIKFPDMVHAFKPDPRTNLDDDARRFDFFSHVPESTRTLTLLYSNEGTPAGYRFMDGNGVHAYKLVNAQGEVHYVKFHWKTLQGSKNLDPKQVAAVQAKDYSHLTNDLVGAIKKGDYPKWDLYLQVLKPEDLAKFDFDPLDATKIWPDVPEQKVGQMVLNKNVDNFFQETEQVAMAPANLVPGIEPSEDRLLQGRIFSYADAQLYRIGTNGLSLPVNRPRVAVNNGNQDGQANTGHTTSGVNY…
BES08_16875_AOR78241.1	AOR78241.1	CP017075.1	Novosphingobium resinovorum	typical catalase Group 7	MHGSNSDEPKCPYGHGAATPLTTQFGAPVVDNSNSYTAGPRGPLLMQDVWLIEKLANLNREVIPERRMHAKGSGAFGTFTVTGDVSKYTRAKFLAEKGKQTELFARFTTVAGERGAADAERDIRGFAVKFYTEEGNWDMVGNNTPVFFVRDPRHFADLNKAVKRDPRTNMRSAQNNWDFWTLLPEAFHQVTYVMGDRGIPKSYRHMDGFSSHTYSFYNEAGERFWVKWHFKTQQGHAHLTDAEAAEVVAGDRESNQRDLYEAIERGEFPKWKVMVQIMDEAEAETCGFHPFDLTKVWSQKVYPLIEVGMMELNRNPENFFADVEQSAFSPSNLVPGIGVSPDKMLQARLFAYSDAQRYRLGVNHHQIPVNAARCPVFNNHRDGQGRVDGNYGGLLHYHP…
BES08_27855_AOR80651.1	AOR80651.1	CP017077.1	Novosphingobium resinovorum	typical catalase Group 6	MTDRSTPRTTNDAGIPIQSDEHSLTIGRDGPIVLNDHYLIEQMANFNRERIPERQPHAKGSGAFGHFETTGDVTAYTKAKLFQPGAKVDTAIRFSTVAGESGSPDTWRDPRGFSVKFYTEEGNFDMVGNNTPIFFIRDPMKFQHFIRSQKRRADNGLRDHDMQWDFWTLSPESAHQVTYLMGDRGIPKTWREMNGYSSHTYSLVSAKGEKFWVKFHFKTDLGDGNAYFSQADADTMAGKDGDFHRRDLFNAIDQGEHPSWTLFWQVMPYEDAKTYRINPFDLTKIWPHADYPLIEVGKLTLTRNPTDFHSEIEQLAFEPNNMVPGVGLSPDKMLLARGFSYADAHRARLGVNYKQIPVNRPVAPVHSYSTAGAMRIEKATDPVYAPNSYGGPAAERDPY…
BES08_28075_AOR80993.1	AOR80993.1	CP017077.1	Novosphingobium resinovorum	typical catalase Group 5	MDIGGESLQKADPVPADADIAFAYSEPQGAGGETRQVAGGEVPTMTTQQGIPVGDDQNSLKQGARGPTLLEDFHFREKMFHFDHERIPERVVHARGYAAHGYFELTDSLADVSRADIFQRVGERTPAFVRFSTVAGSKGSVDLARDVRGFAVKLYTQEGNWDLVGNNIPVFFIQDAMKFPDLIHAAKPEPDRAFPQAQTAHDNFWDFISLTPESFHMVMWAMSDRAIPRSFRTMEGFGVHTFRLIDAKGKSTFVKFHWKPKQGLQSVVWNEAVKINGADPDFHRRDLWDAINSGDYPEWELGVQLFDDAFADSFDFDVLDATKLIPEELVPVRVVGRLVLDRVVDNFFAETEQVAFCTQNVPPGIDFSNDPLLQGRNFSYLDTQIKRLGGPNFTHIPIN…
BF17_12405_AHK20025.1	AHK20025.1	CP007230.1	Yersinia similis	catalase-peroxidase Group 2	MLKKILPVLITLAIVNNTSTAWAVETSNADSFYLPKSLDLSPLRLHNIESNPYGKDFNYAQQFKTLDLDAVKKDIKTVLTTSQDWWPADYGNYGPFFIRMAWHGAGTYRVYDGRGGADGGQQRFEPLNSWPDNANLDKARRLLWPIKKKYGAKISWGDLMVLTGNVALESMGFKTLGFAGGREDDWQSDLVYWGAGNKILSDNRDKNGKLPKPLAATQMGLIYVNPEGPNGKPDPVASAKDIREAFAGMAMNDEETVALIAGGHTFGKAHGAASPAKCLGAAPGEAGLEQQGLGWANKCGSGNGKDTITSGLEGAWTTDPTHFTMQYLSNLYKHEWVLTKSPAGAWQWKPKDAANVVPDATDPTKLHPLMMFTTDIALKVDPEYKKITTRFLENPEEFK…
BFC19_04380_ANZ94689.1	ANZ94689.1	CP016839.1	Brochothrix thermosphacta	typical catalase Group 6	MTNQHNAKLTTNTGAPVGDNQNTMTAGVNGPVLLQDVHFIEKMAHFDRERVPERVVHAKGAGAHGVFKVTNDLTKYTRADFLSEVGKETEMLARFSTVAGELGSADTLRDPRGFSLRFYSEEGNYDLVGNNTPVFFIRDPLKFPDFIHTQKRNPQTHLKSTTAVWDFWSLSPESLHQVTILMSDRGIPASFRHMHGYGSHTYRWTNAEGESFWVKYHFRTDQGVQNLTAEAAERLAGQNPDYHTEDLFYAIEDGEFPSWTLSVQIMPLEDAAKYRFNSFDVTQVWSQKDYPLIEVGTMTLNRNPENYFATIEQAAFSPANIVPGIDFSPDKMLHGRVFAYPDTQRHRIGPNYNLLKVNQPKNPINNYQRDGSMRSDNNGGSDVYYEPNSFGGPKESPVD…
BFC22_00275_ANZ98624.1	ANZ98624.1	CP016843.1	Carnobacterium divergens	typical catalase Group 6	MTKNLDPTKSNLTTDQGAPVGDNQNSMTAGVRGPVLIQDVALLEKLAHFNRERIPERVVHAKGAGAHGYFEVTNDLSHYTKADLFSKVGKKTPMFARFSTVAGESGSADTLRDPRGFALKFYTEEGNYDIVGNNTPVFFIRDAIKFPDFIHTQKRDPQSHLKNPNAVWDFWSLSPEALHQVTILMSDRGIPATFRHMHGFGSHTFKWTNAEGESVWVKYHFKTEQGIKNLTADVAEQIAGENPDHHTEDLFNAIENGDFPAWKVCVQLMPLADADHYRFNPFDVTKVWSQKDYPLIELGRMVLNENPANYFAEVEQVTFSPGNIVPGIDFSPDKLLQGRLFAYGDAHRHRVGANSHLLPINRSKNDVNNYHRDGAMRSDANGGGSAYYEPNSLGGPTET…
BFC23_11875_AOA03163.1	AOA03163.1	CP016844.1	Carnobacterium maltaromaticum	typical catalase Group 6	MTKNLDSHKSNLTTDAGAPIGDNQNSMTAGNRGPVLIQDVALLEKLAHFNRERIPERVVHAKGAGAHGYFEVTNDLTEYTKADFLSEIGKKTPVFTRFSTVAGESGSADTLRDPRGFAVKLYTDEGNYDIVGNNTPIFFIRDAIKFPDFIHTQKRDPQTHLKNHNAIWDFWSLSPESLHQVTILMSDRGIPATFRHMHGFGSHTFKWTNAAGESVWVKYHFKTEQGIKNLTAEVAEELAGSNPDYHTEDLFNAIENGDAPAWKLCVQIMPLADADHYRFNPFDVTKVWSQKDYPLIEVGRMVLDRNTDNYFAEVEQVTFTPGNIVPGVDFSPDKLLQGRLFAYGDAHRHRVGANSHLLPINRPKNEVKNYHRDGAMRSDANGGSSVYYEPNSLGGPTET…
BFG07_07200_AST68477.1	AST68477.1	CP022690.1	Kosakonia cowanii	catalase-peroxidase Group 4	MSTSDETNRDAGMGKCPFHHEASKPETKSSGPTTNRDWWPNQLRVDLLNQHSSRSNPLGEQFNYREAFKQLDYSALKTDIRGVLTDSQAWWPADWGSYIGLFIRMAWHSAGTYRTVDGRGGSGRGQQRFAPLNSWPDNVSLDKARRLLWPVKQKYGQQISWADLMILAGNVALENSGFRTFGFGAGREDVWEPDMDVDWGSEKEWLTHRHPESLAQAAIGATEMGLIYVNPEGPNASGEPISAAAAIRATFGNMGMNDEETVALIAGGHTLGKTHGAAHAPDYVGADPETAPLEAQGLGWSSSYGSGVGADAITSGLEVAWTQTPTQWSHYFFENLFKYQWVQTRSPGGAIQFEAVDADAVIPDPFDPEKKRKPTMLVTDLTLRFDPEFEKISRRFLND…
BFG07_07215_AST68480.1	AST68480.1	CP022690.1	Kosakonia cowanii	Mn-catalase Group 03	MFRHVKQLQYTVRVSEPNPGLANLLLEQFGGPQGELAAACRYFTQGLGDDDAGRKEMLMDIATEELSHLEIIGSLVGMLNKGAKGALAEGTESEAELYRSLTQSGNDSHVTSLLYGGGPALTNSAGKPWTASYIDTIGEVTADLRSNIAAEARAKIIYERLINLTDDPGVKDALGFLMTREVAHMMSFEKALYSIRNNFPPGKLPPIEQYSNVYYNMSEGDDPRGSWNSDENFEYVANPQPAVDGGDGLITVQLTPEQLAMVKAMSDRTMSDPSVEPITGFELGTGEPKSKK
BFG07_10125_AST69013.1	AST69013.1	CP022690.1	Kosakonia cowanii	typical catalase Group 5	MSQHEKETQPSRAPVDDENEARPGLDSLAPSDNSHRPSPKPTAPGEEPTAPGSLKSPDTANEKLNAMEPFRKGGENAALTTNQGVRISDDQNSLRAGSRGPTLLEDFILREKITHFDHERIPERIVHARGSAAHGYFQPYRSLQDVTKADFLSDPEKITPVFVRFSTVQGGAGSADTVRDIRGFATKFYTEEGIFDLVGNNTPIFFLQDAHKFPDFVHAVKPEPHWAIPQGQSAHDTFWDYVSLQPETLHNVMWAMSDRGIPRSYRTMEGFGIHTFRLINAEGKATFVRFHWKPLAGKASLVWDESQKLTGRDPDFHRRELWEAIEAGDYPEYELGLQLIPEEDEFKFDFDLLDPTKLIPEALVPVQRVGKMVLNRNPDNFFAENEQVAFHPGHIVPGL…
BFG52_13860_AOA59335.1	AOA59335.1	CP016895.1	Acinetobacter larvae	typical catalase Group 7	MSNPPKKCPVTHLTTDFGAPVVDNQNSLTAGARGPLLAQDLWLNEKLANFVREVIPERRMHAKGSGAFGTFTVTHDIRQYTSAKIFSEVGKKTEMFARFTTVAGERGAADAERDIRGFALKFYTEEGNWDMVGNNTPVFFLRDPRKFPDLNKAVKRDPRTNMRSATNNWDFWTLLPEALHQVTIVMSDRGIPKSFRHMHGFGSHTYSFINAQQQRFWVKFHFRTQQGIANLTDAEAAAVIANDRESNQRDLYDAIEKGDYPKWTMYIQVMPETDAEKVPYHPFDLTKVWPHGDYPLIEVGEFELNRNPENFFLDVEQSAFAPSNLVPGISASPDKMLQARLFNYADAQRYRLGPNYQQIPVNAARCPVHSNHRDGQGRIDDNYGGLPHYEPNSFQQWQE…
BFS30_09655_AOM77408.1	AOM77408.1	CP017141.1	Pedobacter steynii	typical catalase Group 5	MKKPTVPKGSSKKEDLIPDTSDGTGKLLTTNQGLKINDDQNSLKAGERGATLLEDFILREKITHFDHERIPERIVHARGSGTHGVFQLYKPQSAYTKAGFLNDTNIETPVFVRFSTVAGSRGSTDLARDVRGFSVKFYTQEGIYDLVGNNMPIFFIQDAIKFPDLVHAVKPEPNHEMPQAASAHDTFWDFISLMPESTHMVMWLMSDRAIPRSYRMMEGFGVHTFRLINEEGKSHFVKFHWKPLLGVHSVAWNEAQKISGNDPDFHRRDLWEAIEAGAFPEWELGIQVIPEEDEHKFDFDLLDPTKLVPEELVPVQRIGKMTLNRNPDNFFAETEQVAFHPGHIVPGIDFTNDPLLQGRLFSYTDTQLSRLGGPNFHEIPINRPISPVYNNQRDGHMRQ…
BFS30_20940_AOM79411.1	AOM79411.1	CP017141.1	Pedobacter steynii	catalase-peroxidase Group 4	MERESNDISKCPFHNGSMKHNVGGGGTRNNDWWPNQLKLSILRQHSSLSSPMGEDFDYAEAFKSLDLAAVKNDLHALMTDSQDWWPADFGHYGGLFIRMAWHSAGTYRVGDGRGGAGAGLQRFAPLNSWPDNVSLDKARRLLWPIKQKYGHSISWADLMILAGNVALESMGFKTFGFAGGREDVWEADESVYWGSETTWLGGDLRYAHGSPGVEGDGVLVTDDKADGDVHSRNLEKPLAAVQMGLIYVNPEGPDGNPDPIAAAKDIRDTFGRMAMDDEETVALIAGGHSFGKTHGAASADHVGKEPEAVDLELQGLGWSNSYGSGKGADAITSGLEVIWTKTPTQWSNNFFENLFGFEWELSKSPAGAHQWVAKDAEAFIPDAFDASKKHLPTMLTTDL…
BFX80_06785_AOM02907.1	AOM02907.1	CP017114.1	Cobetia marina	typical catalase Group 4	MKTLTAVMALGLSASSLAQQEVMTRSNGAPIGNNQDSLTAGQNGPTLLQDHHLLEKLGHFERERIPERVVHARGIGAYGEFRATADLTDLTVAAPFQDKGQVTPVFVRFSSVINSKGSPETLRDPRGFAVKFYTDQGNWDMVGINFPVFFIRDAMKFPDMIHALKPDPRTNLQDPNRYFDFFSHIPESTNMLTYLYSPLGVPASLREMDGSGVHAFKFVNGEGDWKYVKFTWKSRQGNHGMSPEEIAKVQSTDFNHLTDDLYTHLDEGDDPVWDLYIQTLDPRQLNSFDFNPLDTTKLWPQDLIPARKVGELTLNRVPDNFFQETEQAAMSPANLVPGIEPSEDRMLQGRLFAYADAQRYRLGANYSQLPVNAPKVAVHNNHQDGAGYSAPRSGSINYQ…
BFX80_14460_AOM02256.1	AOM02256.1	CP017114.1	Cobetia marina	typical catalase Group 7	MSQTPRYTTGNGAPVPHDDISQTAGPNGSLTFDNWRLFEKLAHFNRERIPERVVHARGVAAYGTFTLTRDLSDLTIARFLQGVGKQTPMLARFSTVAGGQDSGDNTRDVRGFSLKFYTEEGNWDMVGNNTPVFFIREPSKFPDFIHTQKKDPRTNMVDWQNRWEFWANHPQALHQVTILMSDRGIPKSLTTMNGYSSHTLSLWNDKGERVWVKWHFKTDQGHETLTDDEAAQVAPDFHQHDMFTRLERGERPSWTVNLQVMTEQQARDYHINPFDLTKVWPHGDFPLMEVGKMELNRNPENYFAEVEQSVFSPSNFVPGIGASPDRVLQARLWAYADAHRYRVGANAEQLPVNRPVCPVNHYQRDGVMAGMCPVTGHGGGPLGGQVGQGVPGETKEGGQ…
BG023_11783_AOL93732.1	AOL93732.1	CP017113.1	Porphyrobacter sp. LM 6	catalase-peroxidase Group 3	MDAKTGDISGCPFHGSAQTRSLLGRTNRDWWPEAMQLDILTEQGKSANPYGEDFDYAEAFNTLDYAALKADLTALMTDSQPWWPADYGHYGPFFIRMAWHAAGTYRTGDGRGGAGSGQQRFAPLNSWPDNGNLDKARRLLWPIKQKYGKNISWADLFILAGNVAIESMGGPVFGFGGGRADVFEPESVYWGTEEQWVNEGVATRIQPKEGMALENPLAAIQMGLIYVNPEGPGGNPDPLESARDMRETFARMAMNDEETVALTAGGHAFGKAHGAAPASTFGGSPESESLELQGFGWLVDQDEINAGHITTSGIEGSWSNNPTAWSHDYFRLLFKYDYELVHSPAGAQMWTPINPAPEDMAPDARDPNKRVPTIMTTADMALKMDPEYRKISERFLAHP…
BG454_08905_ATX67778.1	ATX67778.1	CP024899.1	Rhodobaca barguzinensis	catalase-peroxidase Group 3	MDGSDKAGKCPVMHGGQTNTGNAVMDWWPKALNLDILHQHDTKVNPLTGFDYREEVKKLDVEALKADVHALLTDSQDWWPADWGHYGGLMIRMSWHAAGTYRVQDGRGGAGTGNHRFAPLNSWPDNANLDKARRLLWPIKKKYGNQISWADLMVLAGTIAYENMGLKTFGFAFGREDIWHPEKDVYWGSEKEWLAPSDERYDNVGDASTMENPLSAVQMGLIYVNPEGVNGQPDPLKTAAHVRETFARMAMNDEETVALTAGGHTVGKSHGNGRAENLGPAPEGAALEEAGMGWMNHKTRAVGRDTVTSGIEGAWTTEPTKWDMGYFKLLFGYEWELKKSPAGAWQWEPINIKEEDKPVDVEDPSIRLNPIMTDADMAMKMDPTYRAICEKFMADPASF…
BG602_11930_QEA82256.1	QEA82256.1	CP017549.1	Mannheimia haemolytica	typical catalase Group 7	MSKCPVTHLTMNNGAPVVDNQNSLTAGPRGPLLAQDLWLNEKLANFVREVIPERRMHAKGSGAFGTFTVTNDITKYTRAAIFSQVGKKTEMFARFTTVAGERGAADAERDIRGFALKFYTEEGNWDMVGNNTPVFFLRDPRKFPDLNKAVKRDPRTNMRSATNNWDFWTLLPEAFHQVTIVMSERGIPASYRHMHGYGSHTYSFINAANERFWVKFHFHTQQGIKNLTNEEAAAIIANDRESHQRDLYEAIERGDFPKWKMFVQIMPETDADKVPYHPFDLTKVWPKSDYPLIEVGEFELNRNPENFFADVEQSAFAPSNLVPGISVSPDRMLQARLFNYADAQRYRLGVNHHQIPVNAPRCPVHSNARDGQGRVDGNYGSTIHYEPNSFGKWQEQAQY…
BG910_04170_ASK27046.1	ASK27046.1	CP022278.1	Neisseria sp. 10023	typical catalase Group 7	MSQHKCPVTHLTMNNGAPVADNQNSLTAGARGPLLAQDLWLNEKLANFVREVIPERRMHAKGSGAFGTFTVTHDITRYTKAKLFSQIGKKTEMFARFTTVAGERGAADAERDIRGFALKFYTEEGNWDMVGNNTPVFFLRDPRKFPDLNKAVKRDPRTNMRSATNNWDFWTLLPEAFHQVTIVMSERGIPKSYRHMHGFGSHTYSFINAQNERFWVKFHFRTQQGIQNLSNEEAAAVIAEDRESHQRDLYEAIERGEFPKWTMFVQIMSEADAEKVPYHPFDLTKVWPKSDYPLIEVGEFELNKNPENFFADVEQSAFAPSNLVPGISVSPDKMLQARLFNYADAQRYRLGVNHHQIPVNAPRCPVHSNARDGQGRTDGNYGSTIHYEPNSFGQWQEQA…
BGP89_03300_AOH35498.1	AOH35498.1	CP017074.1	Luteimonas sp. JM171	typical catalase Group 6	MTKRDKQDTGSTMSTGAPAPSDRHSLTIGPNGPILLHDVHFLEQMAHFNREKVPERQPHAKGGGAYGVFETTEDVSKYTKAALFQKGEKTDLLIRFSTVAGEQGSPDTWRDVRGFSLKFYTRQGNYDLVGNNTPIFFVRDPMKFPHFIRSQKRLPDSGLRDNHMQWDFWTANPESAHQVTYLMGPRGLPRTWRHMNGYGSHTFMWINEDGERFWVKYHFHTEQGMEFFSNAEAMDMAGSDADFHRRDLFDAIARGDHPKWVLSVQVMPYEDAKSYCFNPFDLTKVWPHADYPLIRVGVMTLNRNPENFFAEIEQAAFSPGNVVPGIGLSPDKMLLGRAFAYNDAQRRRIGTNFHQLPVNQPKVPVNTYMFDGHMTYHHSGAQPVYAPNSGDRTWADETG…
BH708_06110_APX32366.1	APX32366.1	CP017297.1	Brachybacterium sp. P6-10-X1	typical catalase Group 5	MTSANNTPTPAPGRPSSRPPSLDEPTEPTGPLEPTPDQEAAQPRTPTGAEPGPERSTTAQQGEFLTTSQGARLQDTDHSLKAGRRGPVLLQDHHLREKVTHFDHERIPERVVHARGAAAHGVFEGYGTAESVCRAGFLAKGKRTEVFTRFSTVVGSRGSMDTARDTRGFATKLYTDEGTFDLVANNIPVFFIQDGIKFPDVVHAAKPHPDREIPQAQSAHDTFWEFVSLHTEAQHHTLWFMGDRGIPRSFRMMEGFGIHTFRLANADGETSLVKFHWKPTLGVHSLTWEEAQILGGADPDFHRRDLSDAIEAGAHPSWELGIQVFPDDEEQSFEGIDLLDPTKFVPEEFAPVQPIGRMTLDRNPSNYFAETEQVAFNPGHLVPGIDVTDDPLLQVRLFS…
BH708_09055_APX32841.1	APX32841.1	CP017297.1	Brachybacterium sp. P6-10-X1	typical catalase Group 6	MTDFDPTIPSTTESGAPRESDAHSLSIGADGPLLLHDVNLVEKLARFDRERVPERSPHAKGSGAFGELEVTEDVSMYTKADLFQPGRKTPMVQRFSTVAGELGSPDTWRDVRGFSMKFYTQQGNYDLVGNNTPVFFLRDPMKFPDFIHSQKRTADSGLRDNTMQWDFWTSVPESAHQVTYVMGQRGLPKSWRHMNGYGSHTYMWINESGEKFWVKYHFHTDQGMEFLSNEEADRLAGVDGDYHRRDLFESIAQGDFPSWTLSVQVIPYEEAKTYRYNIFDLTKTVSHKDYPLIKVGRITLNQNPKNHFAQIEQAAFSPSNTVPGIGLSPDKMLLGRSFSYPDAQRNRIGTNFNQLPVNRPIVPTNSYDKEGAMEFFHSEDAPVYAPNSYGRKYAAEQGP…
[truncated: 4,041 more rows]

## Sheet: 1,079 Streptomyces homologs
Protein name	Protein Accession	Nucleotide Accession	Organism	Group	Sequence
[truncated: 1,079 more rows]
